# Supplementary material for: Peat-based gnotobiotic plant growth systems for Arabidopsis microbiome research
Source: Springer Nature journal article supplement (doi:10.1038/s41596-021-00504-6), 2021-04-28
Supplement: MOESM3 [file 41596_2021_504_MOESM3_ESM18.xlsx]

## Sheet: Soil Input Community Locations
Supplementary Table 1. Geographic locations of soils used in this study.
Soil	Coordinates	Altitude	Depth	Sieve	Jurisdiction	Description
Michigan Agricultural Soil	42.7089°N, -84.4656°E	261 M	10 cm	3 mm	East Lansing, Michigan, USA	Sandy loam used for miscanthus cultivation; no additional inputs
California Arid Soil	33.3037°N, -116.8511°E	1604 M	10 cm	3 mm	Cleveland National Forest, California, USA	Fine loam soil from an arid region of California; Collected from a backslope
Iowa undisturbed Prairie	41.8361°N, -93.0078°E	271 M	10 cm	3 mm	Iowa, USA	Fine silt soil from an undisturbed grassland
Map reproduced with permission from Kremer, J.M. 2017. Characterization of axenic immune deficiency in Arabidopsis thaliana. Michigan State University Ph.D. thesis.
