# Supplementary material for: Peat-based gnotobiotic plant growth systems for Arabidopsis microbiome research
Source: Springer Nature journal article supplement (doi:10.1038/s41596-021-00504-6), 2021-04-28
Supplement: MOESM4 [file 41596_2021_504_MOESM4_ESM19.xlsx]

## Sheet: 16S_OTUtable
Supplementary Table 2. OTU information for the example community profiling workflow used to generate the heatmap in Fig. 6
Classified OTU sequences																Relative abundance of OTUs															Abundance	OTU classifications
#sum	35122	23641	27312	37740	27188	23451	38202	38933	40156	49965	68101	42200	52986	57440	56505																Fig.6 cutoff
#OTU ID	cali1	cali2	cali3	cali4	cali5	iowa1	iowa2	iowa3	iowa4	iowa5	mich1	mich2	mich3	mich4	mich5	cali1	cali2	cali3	cali4	cali5	iowa1	iowa2	iowa3	iowa4	iowa5	mich1	mich2	mich3	mich4	mich5	>0.02	phylum	phy_conf	class	class_conf	subclass	subc_conf	order	order_conf	suborder	subo_conf	family	fam_conf	genus	genus_conf
Otu1	259	0	489	6	26	380	78	336	67	19	38547	26465	27234	31658	30689	0.0073743	0	0.0179042	0.000158983	0.000956304	0.016204	0.00204178	0.00863021	0.00166849	0.000380266	0.566027	0.627133	0.513985	0.551149	0.54312	Y	Proteobacteria	1	Betaproteobacteria	1			Burkholderiales	1			Burkholderiaceae	1	Burkholderia	1
Otu11	0	0	0	0	0	355	2764	4025	3205	2485	12	11	3	6	5	0	0	0	0	0	0.0151379	0.0723522	0.103383	0.0798137	0.0497348	0.000176209	0.000260664	5.66187e-05	0.000104457	8.84877e-05	Y	Proteobacteria	1	Betaproteobacteria	1			Burkholderiales	1			Burkholderiaceae	1	Ralstonia	0.49
Otu12	1	0	0	28	7	1443	1604	1601	597	409	6100	1404	2722	1903	904	2.84722e-05	0	0	0.000741918	0.000257467	0.0615326	0.0419873	0.0411219	0.014867	0.00818573	0.0895728	0.0332701	0.0513721	0.0331302	0.0159986	Y	Proteobacteria	1	Betaproteobacteria	1			Burkholderiales	1			Comamonadaceae	1	Variovorax	0.98
Otu13	0	0	0	0	0	1396	5480	1191	2983	13357	3	8	1565	7	2	0	0	0	0	0	0.0595284	0.143448	0.030591	0.0742853	0.267327	4.40522e-05	0.000189573	0.0295361	0.000121866	3.53951e-05	Y	Proteobacteria	1	Alphaproteobacteria	1			Rhizobiales	1			Rhizobiaceae	0.98	Rhizobium	0.94
Otu131	0	0	0	2	2	565	209	211	1568	279	0	0	0	0	561	0	0	0	5.29942e-05	7.35619e-05	0.0240928	0.00547092	0.00541957	0.0390477	0.00558391	0	0	0	0	0.00992832	Y	Proteobacteria	1	Gammaproteobacteria	1			Pseudomonadales	0.99			Pseudomonadaceae	0.99	Pseudomonas	0.99
Otu14	22	6	196	540	1388	38	303	144	1539	34	3225	1967	2739	9011	1952	0.000626388	0.000253796	0.00717633	0.0143084	0.0510519	0.0016204	0.00793152	0.00369866	0.0383255	0.000680476	0.0473561	0.0466114	0.0516929	0.156877	0.0345456	Y	Proteobacteria	1	Betaproteobacteria	1			Burkholderiales	1			Burkholderiaceae	1	Burkholderia	0.85
Otu1441	6	18	14	12	12	81	5	11	2	4	434	41	1638	95	2389	0.000170833	0.000761389	0.000512595	0.000317965	0.000441371	0.00345401	0.000130883	0.000282537	4.98058e-05	8.0056e-05	0.00637289	0.000971564	0.0309138	0.0016539	0.0422794	Y	Proteobacteria	1	Betaproteobacteria	1			Burkholderiales	1			Oxalobacteraceae	0.99	Massilia	0.87
Otu16	0	8	0	0	1	1790	443	70	427	46	4428	1366	1226	802	2176	0	0.000338395	0	0	3.67809e-05	0.0763294	0.0115963	0.00179796	0.0106335	0.000920644	0.0650211	0.0323697	0.0231382	0.0139624	0.0385099	Y	Proteobacteria	1	Gammaproteobacteria	1			Xanthomonadales	1			Xanthomonadaceae	1	Dyella	0.98
Otu17	0	0	0	0	0	102	6970	3	1840	104	1	2	2	5	0	0	0	0	0	0	0.00434949	0.182451	7.70555e-05	0.0458213	0.00208146	1.46841e-05	4.73934e-05	3.77458e-05	8.70474e-05	0	Y	Bacteroidetes	1	Flavobacteriia	1			"Flavobacteriales"	1			Flavobacteriaceae	1	Flavobacterium	0.99
Otu18	0	609	586	11	1581	63	105	278	88	68	0	0	0	0	2	0	0.0257603	0.0214558	0.000291468	0.0581507	0.00268645	0.00274855	0.00714047	0.00219145	0.00136095	0	0	0	0	3.53951e-05	Y	Proteobacteria	1	Gammaproteobacteria	1			Pseudomonadales	1			Pseudomonadaceae	1	Pseudomonas	1
Otu2	10390	10078	7392	16411	9923	1300	501	1046	222	355	844	330	729	1429	3482	0.295826	0.426293	0.27065	0.434844	0.364977	0.0554347	0.0131145	0.0268667	0.00552844	0.00710497	0.0123934	0.00781991	0.0137584	0.0248781	0.0616229	Y	Proteobacteria	1	Betaproteobacteria	1			Burkholderiales	1			Oxalobacteraceae	1	Massilia	0.98
Otu20	338	125	134	818	113	90	307	407	814	1744	0	0	2	3	1	0.0096236	0.00528742	0.00490627	0.0216746	0.00415625	0.00383779	0.00803623	0.0104539	0.0202709	0.0349044	0	0	3.77458e-05	5.22284e-05	1.76975e-05	Y	Proteobacteria	1	Gammaproteobacteria	1			"Enterobacteriales"	1			Enterobacteriaceae	1	Erwinia	0.99
Otu21	605	343	110	477	312	3	46	762	2823	5	2	0	3	3	0	0.0172257	0.0145087	0.00402753	0.0126391	0.0114757	0.000127926	0.00120413	0.0195721	0.0703008	0.00010007	2.93681e-05	0	5.66187e-05	5.22284e-05	0	Y	Proteobacteria	1	Betaproteobacteria	1			Burkholderiales	1			Oxalobacteraceae	1	Herbaspirillum	0.42
Otu22	0	0	0	0	0	111	71	1076	711	10	0	0	0	0	0	0	0	0	0	0	0.00473327	0.00185854	0.0276372	0.0177059	0.00020014	0	0	0	0	0	Y	Bacteroidetes	1	Flavobacteriia	1			"Flavobacteriales"	1			Flavobacteriaceae	1	Flavobacterium	0.96
Otu24	1755	347	1506	1311	348	4	4	5	5	8	0	0	0	0	0	0.0499687	0.0146779	0.0551406	0.0347377	0.0127998	0.000170568	0.000104707	0.000128426	0.000124514	0.000160112	0	0	0	0	0	Y	Proteobacteria	1	Gammaproteobacteria	1			"Enterobacteriales"	1			Enterobacteriaceae	1	Pantoea	0.97
Otu27	0	0	0	0	0	521	1374	1951	940	95	0	0	127	3	1	0	0	0	0	0	0.0222165	0.0359667	0.0501117	0.0234087	0.00190133	0	0	0.00239686	5.22284e-05	1.76975e-05	Y	Proteobacteria	1	Alphaproteobacteria	1			Rhizobiales	1			Rhizobiaceae	1	Rhizobium	1
Otu28	7	0	1097	345	2	37	1	9	0	0	139	12	10	28	14	0.000199305	0	0.0401655	0.00914149	7.35619e-05	0.00157776	2.61766e-05	0.000231166	0	0	0.00204109	0.00028436	0.000188729	0.000487465	0.000247766	Y	Proteobacteria	1	Alphaproteobacteria	1			Rhizobiales	1			Rhizobiaceae	1	Neorhizobium	0.54
Otu3	0	0	0	0	0	167	528	167	23	11	8747	7466	11649	9220	9639	0	0	0	0	0	0.00712123	0.0138213	0.00428942	0.000572766	0.000220154	0.128442	0.176919	0.219851	0.160515	0.170587	Y	Proteobacteria	1	Alphaproteobacteria	1			Rhizobiales	1			Rhizobiaceae	1	Rhizobium	1
Otu30	90	4	2	0	2	26	3	22	8	2	237	40	514	174	1409	0.0025625	0.000169198	7.32279e-05	0	7.35619e-05	0.00110869	7.85299e-05	0.000565073	0.000199223	4.0028e-05	0.00348013	0.000947867	0.00970068	0.00302925	0.0249358	Y	Proteobacteria	1	Betaproteobacteria	1			Burkholderiales	1			Oxalobacteraceae	0.98	Massilia	0.44
Otu4	0	0	0	0	0	5216	6542	11178	10976	12645	7	3	6	9	3	0	0	0	0	0	0.222421	0.171248	0.287109	0.273334	0.253077	0.000102789	7.109e-05	0.000113237	0.000156685	5.30926e-05	Y	Proteobacteria	1	Alphaproteobacteria	1			Sphingomonadales	1			Sphingomonadaceae	1	Novosphingobium	0.97
Otu42	489	3	389	227	583	0	0	0	0	0	0	0	0	0	0	0.0139229	0.000126898	0.0142428	0.00601484	0.0214433	0	0	0	0	0	0	0	0	0	0	Y	Actinobacteria	1	Actinobacteria	1	Actinobacteridae	1	Actinomycetales	1	Corynebacterineae	1	Nocardiaceae	1	Gordonia	1
Otu5	5857	645	9947	4183	1300	0	3	0	0	0	0	0	0	0	0	0.166762	0.0272831	0.364199	0.110837	0.0478152	0	7.85299e-05	0	0	0	0	0	0	0	0	Y	Bacteroidetes	1	Flavobacteriia	1			"Flavobacteriales"	1			Flavobacteriaceae	1	Chryseobacterium	1
Otu52	189	113	1053	744	897	19	32	158	75	438	0	0	0	0	0	0.00538124	0.00477983	0.0385545	0.0197138	0.0329925	0.0008102	0.000837652	0.00405825	0.00186772	0.00876614	0	0	0	0	0	Y	Proteobacteria	1	Gammaproteobacteria	1			"Enterobacteriales"	1			Enterobacteriaceae	1	Enterobacter	0.66
Otu594	0	0	0	0	0	225	192	1210	728	36	1	1	2	1	0	0	0	0	0	0	0.00959447	0.00502591	0.031079	0.0181293	0.000720504	1.46841e-05	2.36967e-05	3.77458e-05	1.74095e-05	0	Y	Proteobacteria	1	Betaproteobacteria	1			Burkholderiales	1			Oxalobacteraceae	0.99	Herbaspirillum	0.39
Otu6	2933	3185	1658	4939	3882	5074	6097	4952	3961	14269	183	21	67	88	746	0.0835089	0.134724	0.0607059	0.130869	0.142784	0.216366	0.159599	0.127193	0.0986403	0.28558	0.00268719	0.00049763	0.00126448	0.00153203	0.0132024	Y	Proteobacteria	1	Gammaproteobacteria	1			Pseudomonadales	1			Pseudomonadaceae	1	Pseudomonas	1
Otu7	47	16	13	86	10	1	0	0	0	0	1477	621	840	325	240	0.00133819	0.00067679	0.000475981	0.00227875	0.000367809	4.26421e-05	0	0	0	0	0.0216884	0.0147156	0.0158532	0.00565808	0.00424741	Y	Proteobacteria	1	Betaproteobacteria	1			Burkholderiales	1			Burkholderiaceae	1	Burkholderia	1
Otu8	11097	6625	1344	5105	5137	598	858	279	1647	158	65	114	78	1433	28	0.315956	0.280233	0.0492091	0.135268	0.188944	0.0255	0.0224596	0.00716616	0.041015	0.00316221	0.000954465	0.00270142	0.00147209	0.0249478	0.000495531	Y	Proteobacteria	1	Betaproteobacteria	1			Burkholderiales	1			Alcaligenaceae	1	Achromobacter	0.99
Otu9	0	0	0	0	0	204	194	1217	272	1235	1	7	3	1	26	0	0	0	0	0	0.00869899	0.00507827	0.0312588	0.00677358	0.0247173	1.46841e-05	0.000165877	5.66187e-05	1.74095e-05	0.000460136	Y	Proteobacteria	1	Betaproteobacteria	1			Burkholderiales	1			Oxalobacteraceae	1	Massilia	0.96
Otu10	9	47	77	663	9	0	0	0	1	0	0	0	0	0	0	0.00025625	0.00198807	0.00281927	0.0175676	0.000331028	0	0	0	2.49029e-05	0	0	0	0	0	0	n	Proteobacteria	1	Alphaproteobacteria	1			Caulobacterales	1			Caulobacteraceae	1	Caulobacter	0.78
Otu100	0	0	0	0	0	2	0	0	0	0	21	14	16	3	2	0	0	0	0	0	8.52842e-05	0	0	0	0	0.000308366	0.000331754	0.000301967	5.22284e-05	3.53951e-05	n	Proteobacteria	1	Betaproteobacteria	1			Burkholderiales	1			Burkholderiaceae	1	Burkholderia	0.64
Otu1000	0	0	0	0	0	0	0	0	0	0	0	0	0	0	0	0	0	0	0	0	0	0	0	0	0	0	0	0	0	0	n	Firmicutes	0.94	Bacilli	0.88			Bacillales	0.71			Paenibacillaceae 1	0.64	Saccharibacillus	0.64
Otu1001	0	0	0	0	0	2	0	0	0	0	0	0	0	0	0	0	0	0	0	0	8.52842e-05	0	0	0	0	0	0	0	0	0	n	Proteobacteria	1	Alphaproteobacteria	0.64			Rhizobiales	0.59			Rhizobiales_incertae_sedis	0.21	Amorphus	0.21
Otu1002	0	0	0	0	0	0	0	0	0	0	0	0	0	0	0	0	0	0	0	0	0	0	0	0	0	0	0	0	0	0	n	Actinobacteria	0.54	Actinobacteria	0.54	Actinobacteridae	0.54	Actinomycetales	0.54	Propionibacterineae	0.51	Propionibacteriaceae	0.51	Mariniluteicoccus	0.34
Otu1003	0	0	0	0	0	0	0	0	0	0	0	0	0	3	0	0	0	0	0	0	0	0	0	0	0	0	0	0	5.22284e-05	0	n	Proteobacteria	1	Gammaproteobacteria	0.58			Xanthomonadales	0.5			Xanthomonadaceae	0.48	Frateuria	0.44
Otu1004	0	0	0	0	0	0	0	0	0	0	0	0	0	0	0	0	0	0	0	0	0	0	0	0	0	0	0	0	0	0	n	Proteobacteria	0.7	Alphaproteobacteria	0.7			Rhizobiales	0.7			Xanthobacteraceae	0.52	Pseudolabrys	0.52
Otu1005	0	0	0	0	0	0	0	0	0	0	0	0	0	0	0	0	0	0	0	0	0	0	0	0	0	0	0	0	0	0	n	Proteobacteria	1	Alphaproteobacteria	1			Rhodospirillales	0.93			Acetobacteraceae	0.89	Paracraurococcus	0.27
Otu1006	0	0	0	0	0	0	0	0	0	0	0	0	0	0	0	0	0	0	0	0	0	0	0	0	0	0	0	0	0	0	n	Firmicutes	1	Bacilli	1			Bacillales	1			Paenibacillaceae 1	0.91	Paenibacillus	0.62
Otu1007	0	0	0	0	0	0	0	0	0	0	0	0	0	0	0	0	0	0	0	0	0	0	0	0	0	0	0	0	0	0	n	Bacteroidetes	0.65	Flavobacteriia	0.65			"Flavobacteriales"	0.65			Flavobacteriaceae	0.65	Bergeyella	0.49
Otu1008	0	0	0	0	0	0	0	0	0	0	0	0	0	0	0	0	0	0	0	0	0	0	0	0	0	0	0	0	0	0	n	Acidobacteria	0.51	Acidobacteria_Gp3	0.5									Bryobacter	0.48
Otu1009	0	0	0	0	0	0	0	0	0	0	0	0	0	0	0	0	0	0	0	0	0	0	0	0	0	0	0	0	0	0	n	Proteobacteria	0.88	Deltaproteobacteria	0.66			Desulfuromonadales	0.37			Geobacteraceae	0.36	Geoalkalibacter	0.12
Otu101	0	0	0	0	0	11	2	10	3	0	11	3	6	0	0	0	0	0	0	0	0.000469063	5.23533e-05	0.000256852	7.47086e-05	0	0.000161525	7.109e-05	0.000113237	0	0	n	Proteobacteria	1	Alphaproteobacteria	1			Caulobacterales	1			Caulobacteraceae	1	Caulobacter	0.89
Otu1010	0	0	0	0	0	0	0	0	0	0	0	0	0	0	0	0	0	0	0	0	0	0	0	0	0	0	0	0	0	0	n	Proteobacteria	0.95	Alphaproteobacteria	0.95			Rhodospirillales	0.78			Acetobacteraceae	0.75	Granulibacter	0.51
Otu1011	0	0	0	0	0	0	0	0	0	0	0	0	0	0	0	0	0	0	0	0	0	0	0	0	0	0	0	0	0	0	n	Proteobacteria	0.99	Betaproteobacteria	0.41			Burkholderiales	0.39			Burkholderiales_incertae_sedis	0.11	Ideonella	0.11
Otu1012	0	0	0	0	0	0	0	0	0	0	0	0	0	0	0	0	0	0	0	0	0	0	0	0	0	0	0	0	0	0	n	Proteobacteria	0.99	Gammaproteobacteria	0.9			Chromatiales	0.65			Ectothiorhodospiraceae	0.63	Acidiferrobacter	0.55
Otu1013	0	0	0	0	0	0	0	0	0	0	0	0	0	0	0	0	0	0	0	0	0	0	0	0	0	0	0	0	0	0	n	Proteobacteria	1	Betaproteobacteria	0.73			Rhodocyclales	0.39			Rhodocyclaceae	0.39	Uliginosibacterium	0.25
Otu1014	0	0	0	0	0	0	0	0	0	0	0	0	0	0	0	0	0	0	0	0	0	0	0	0	0	0	0	0	0	0	n	Proteobacteria	1	Gammaproteobacteria	0.68			"Enterobacteriales"	0.68			Enterobacteriaceae	0.68	Rahnella	0.23
Otu1015	0	0	0	0	0	0	0	0	0	0	0	0	0	0	0	0	0	0	0	0	0	0	0	0	0	0	0	0	0	0	n	Proteobacteria	1	Deltaproteobacteria	1			Bdellovibrionales	1			Bdellovibrionaceae	1	Bdellovibrio	1
Otu1016	0	0	0	0	0	0	0	0	0	0	0	0	0	0	0	0	0	0	0	0	0	0	0	0	0	0	0	0	0	0	n	Acidobacteria	0.84	Acidobacteria_Gp3	0.84									Candidatus Solibacter	0.84
Otu1017	0	0	0	0	0	0	0	0	0	0	0	0	0	0	0	0	0	0	0	0	0	0	0	0	0	0	0	0	0	0	n	Proteobacteria	0.98	Betaproteobacteria	0.8			Burkholderiales	0.52			Comamonadaceae	0.47	Zhizhongheella	0.28
Otu1018	0	0	0	0	0	0	0	0	0	0	0	0	0	0	0	0	0	0	0	0	0	0	0	0	0	0	0	0	0	0	n	Proteobacteria	0.63	Betaproteobacteria	0.55			Burkholderiales	0.55			Burkholderiales_incertae_sedis	0.52	Methylibium	0.26
Otu1019	0	0	0	0	0	0	0	0	0	0	0	0	0	0	0	0	0	0	0	0	0	0	0	0	0	0	0	0	0	0	n	Proteobacteria	1	Alphaproteobacteria	0.99			Sneathiellales	0.44			Sneathiellaceae	0.44	Taonella	0.27
Otu102	0	0	0	0	0	0	0	0	0	0	0	0	0	0	0	0	0	0	0	0	0	0	0	0	0	0	0	0	0	0	n	Proteobacteria	1	Betaproteobacteria	1			Hydrogenophilales	0.24			Hydrogenophilaceae	0.24	Thiobacillus	0.24
Otu1020	0	0	0	0	0	0	0	0	0	0	0	0	0	0	0	0	0	0	0	0	0	0	0	0	0	0	0	0	0	0	n	Proteobacteria	0.82	Deltaproteobacteria	0.77			Bdellovibrionales	0.55			Bdellovibrionaceae	0.53	Bdellovibrio	0.53
Otu1021	0	0	0	0	0	1	0	0	0	0	73	27	22	31	133	0	0	0	0	0	4.26421e-05	0	0	0	0	0.00107194	0.00063981	0.000415204	0.000539694	0.00235377	n	Proteobacteria	1	Gammaproteobacteria	0.85			Xanthomonadales	0.85			Xanthomonadaceae	0.85	Fulvimonas	0.38
Otu1022	0	0	0	0	0	0	0	0	0	0	0	0	0	0	0	0	0	0	0	0	0	0	0	0	0	0	0	0	0	0	n	Gemmatimonadetes	0.37	Gemmatimonadetes	0.37			Gemmatimonadales	0.37			Gemmatimonadaceae	0.37	Gemmatimonas	0.37
Otu1023	0	0	0	0	0	0	0	0	0	0	0	0	0	0	0	0	0	0	0	0	0	0	0	0	0	0	0	0	0	0	n	Acidobacteria	0.7	Acidobacteria_Gp2	0.67									Gp2	0.67
Otu1024	0	0	0	0	0	0	0	0	0	0	0	0	0	0	0	0	0	0	0	0	0	0	0	0	0	0	0	0	0	0	n	Proteobacteria	0.67	Betaproteobacteria	0.67			Burkholderiales	0.44			Oxalobacteraceae	0.2	Pseudoduganella	0.09
Otu1025	0	0	0	0	0	0	0	0	0	0	0	0	0	0	0	0	0	0	0	0	0	0	0	0	0	0	0	0	0	0	n	Proteobacteria	1	Alphaproteobacteria	1			Rhizobiales	1			Hyphomicrobiaceae	0.86	Pelagibacterium	0.8
Otu1026	0	0	0	0	0	0	0	0	0	0	0	0	0	0	0	0	0	0	0	0	0	0	0	0	0	0	0	0	0	0	n	Proteobacteria	0.83	Betaproteobacteria	0.82			Burkholderiales	0.59			Oxalobacteraceae	0.5	Pseudoduganella	0.19
Otu1027	0	0	0	0	0	0	0	0	0	0	0	0	0	0	0	0	0	0	0	0	0	0	0	0	0	0	0	0	0	0	n	Actinobacteria	0.6	Actinobacteria	0.6	Actinobacteridae	0.59	Actinomycetales	0.59	Micrococcineae	0.55	Microbacteriaceae	0.54	Schumannella	0.41
Otu1028	0	0	0	0	0	0	0	0	0	0	0	0	0	0	0	0	0	0	0	0	0	0	0	0	0	0	0	0	0	0	n	Proteobacteria	1	Betaproteobacteria	0.89			Nitrosomonadales	0.44			Nitrosomonadaceae	0.44	Nitrosospira	0.44
Otu1029	0	0	0	0	0	0	0	0	0	0	0	0	0	0	0	0	0	0	0	0	0	0	0	0	0	0	0	0	0	0	n	Acidobacteria	0.53	Acidobacteria_Gp1	0.53									Telmatobacter	0.35
Otu103	0	0	0	0	0	0	0	0	0	0	0	0	0	0	0	0	0	0	0	0	0	0	0	0	0	0	0	0	0	0	n	Acidobacteria	1	Acidobacteria_Gp2	1									Gp2	1
Otu1030	0	0	0	0	0	0	0	0	0	0	0	0	0	0	0	0	0	0	0	0	0	0	0	0	0	0	0	0	0	0	n	Proteobacteria	0.84	Betaproteobacteria	0.39			Burkholderiales	0.34			Alcaligenaceae	0.13	Eoetvoesia	0.04
Otu1031	0	0	0	0	0	0	0	0	0	0	0	0	0	0	0	0	0	0	0	0	0	0	0	0	0	0	0	0	0	0	n	Proteobacteria	1	Alphaproteobacteria	1			Sphingomonadales	0.99			Sphingomonadaceae	0.99	Sphingomonas	0.65
Otu1032	0	0	0	0	0	0	0	0	0	0	0	0	0	0	0	0	0	0	0	0	0	0	0	0	0	0	0	0	0	0	n	Proteobacteria	0.92	Alphaproteobacteria	0.87			Rhizobiales	0.82			Methylobacteriaceae	0.41	Psychroglaciecola	0.41
Otu1033	0	0	0	0	0	0	0	0	0	0	0	0	0	0	0	0	0	0	0	0	0	0	0	0	0	0	0	0	0	0	n	Proteobacteria	1	Alphaproteobacteria	1			Rhodospirillales	1			Acetobacteraceae	0.98	Acidocella	0.23
Otu1034	0	0	0	0	0	0	0	0	0	0	0	0	0	0	0	0	0	0	0	0	0	0	0	0	0	0	0	0	0	0	n	Proteobacteria	1	Alphaproteobacteria	1			Rhizobiales	0.98			Rhodobiaceae	0.29	Afifella	0.22
Otu1035	0	0	0	0	0	0	0	0	0	0	0	0	0	0	0	0	0	0	0	0	0	0	0	0	0	0	0	0	0	0	n	Proteobacteria	0.85	Alphaproteobacteria	0.78			Rhizobiales	0.66			Beijerinckiaceae	0.41	Methyloferula	0.4
Otu1036	0	0	0	0	0	0	0	0	0	0	0	0	0	0	0	0	0	0	0	0	0	0	0	0	0	0	0	0	0	0	n	Proteobacteria	0.99	Alphaproteobacteria	0.7			Rhizobiales	0.7			Xanthobacteraceae	0.51	Pseudolabrys	0.51
Otu1037	0	0	0	0	0	0	0	0	0	0	0	0	0	0	0	0	0	0	0	0	0	0	0	0	0	0	0	0	0	0	n	Actinobacteria	0.62	Actinobacteria	0.62	Actinobacteridae	0.62	Actinomycetales	0.62	Propionibacterineae	0.6	Propionibacteriaceae	0.6	Auraticoccus	0.39
Otu1038	0	0	0	0	2	6	2	7	0	0	0	0	0	0	0	0	0	0	0	7.35619e-05	0.000255853	5.23533e-05	0.000179796	0	0	0	0	0	0	0	n	Proteobacteria	1	Betaproteobacteria	0.9			Burkholderiales	0.62			Alcaligenaceae	0.14	Paralcaligenes	0.12
Otu1039	0	0	0	0	0	0	0	0	0	0	0	0	0	0	0	0	0	0	0	0	0	0	0	0	0	0	0	0	0	0	n	Proteobacteria	0.83	Betaproteobacteria	0.74			Burkholderiales	0.68			Oxalobacteraceae	0.62	Paraherbaspirillum	0.39
Otu104	0	0	0	0	0	0	0	0	0	0	0	0	0	0	0	0	0	0	0	0	0	0	0	0	0	0	0	0	0	0	n	Proteobacteria	1	Alphaproteobacteria	1			Rhodospirillales	1			Acetobacteraceae	1	Acidisphaera	0.69
Otu1040	0	0	0	0	0	0	0	0	0	0	0	0	0	0	0	0	0	0	0	0	0	0	0	0	0	0	0	0	0	0	n	Proteobacteria	1	Betaproteobacteria	1			Burkholderiales	0.99			Oxalobacteraceae	0.97	Glaciimonas	0.47
Otu1041	0	0	0	3	0	0	0	0	0	0	0	0	0	0	1	0	0	0	7.94913e-05	0	0	0	0	0	0	0	0	0	0	1.76975e-05	n	Proteobacteria	0.6	Gammaproteobacteria	0.56			Pseudomonadales	0.15			Pseudomonadales_incertae_sedis	0.11	Dasania	0.11
Otu1042	0	0	0	0	0	0	0	0	0	0	0	0	0	0	0	0	0	0	0	0	0	0	0	0	0	0	0	0	0	0	n	Acidobacteria	0.43	Acidobacteria_Gp1	0.43									Terriglobus	0.36
Otu1043	0	0	0	0	0	0	0	0	0	0	0	0	0	0	0	0	0	0	0	0	0	0	0	0	0	0	0	0	0	0	n	Bacteroidetes	1	Cytophagia	1			Cytophagales	1			Cytophagaceae	1	Adhaeribacter	0.94
Otu1044	0	0	0	0	0	0	0	0	0	0	0	0	0	0	0	0	0	0	0	0	0	0	0	0	0	0	0	0	0	0	n	Proteobacteria	1	Betaproteobacteria	0.93			Burkholderiales	0.84			Alcaligenaceae	0.83	Candidimonas	0.41
Otu1045	0	0	0	0	0	0	0	0	0	0	0	0	0	0	0	0	0	0	0	0	0	0	0	0	0	0	0	0	0	0	n	Actinobacteria	1	Actinobacteria	1	Actinobacteridae	1	Actinomycetales	1	Micrococcineae	0.5	Intrasporangiaceae	0.41	Arsenicicoccus	0.19
Otu1046	0	0	0	0	0	0	0	0	0	0	0	0	0	0	0	0	0	0	0	0	0	0	0	0	0	0	0	0	0	0	n	Proteobacteria	0.97	Alphaproteobacteria	0.69			Alphaproteobacteria_incertae_sedis	0.61					Rhizomicrobium	0.61
Otu1047	0	0	0	0	0	0	0	0	0	0	0	0	0	0	0	0	0	0	0	0	0	0	0	0	0	0	0	0	0	0	n	Proteobacteria	1	Alphaproteobacteria	0.99			Rhodospirillales	0.61			Rhodospirillaceae	0.61	Nisaea	0.29
Otu1048	0	0	0	0	0	0	0	0	0	0	0	0	0	0	0	0	0	0	0	0	0	0	0	0	0	0	0	0	0	0	n	Deinococcus-Thermus	0.69	Deinococci	0.69			Deinococcales	0.69			Deinococcaceae	0.69	Deinobacterium	0.67
Otu1049	0	0	0	0	0	0	0	0	0	0	0	0	0	0	0	0	0	0	0	0	0	0	0	0	0	0	0	0	0	0	n	Actinobacteria	0.75	Actinobacteria	0.75	Actinobacteridae	0.75	Actinomycetales	0.75	Propionibacterineae	0.69	Propionibacteriaceae	0.69	Auraticoccus	0.4
Otu105	0	0	0	0	0	0	0	0	0	0	0	0	0	0	0	0	0	0	0	0	0	0	0	0	0	0	0	0	0	0	n	Actinobacteria	1	Actinobacteria	1	Actinobacteridae	1	Actinomycetales	1	Frankineae	1	Geodermatophilaceae	1	Modestobacter	1
Otu1050	0	0	0	0	0	0	0	0	0	0	0	0	0	0	0	0	0	0	0	0	0	0	0	0	0	0	0	0	0	0	n	Proteobacteria	1	Betaproteobacteria	0.9			Burkholderiales	0.9			Burkholderiales_incertae_sedis	0.4	Xylophilus	0.36
Otu1051	0	0	0	0	0	0	0	0	0	0	0	0	0	0	0	0	0	0	0	0	0	0	0	0	0	0	0	0	0	0	n	Proteobacteria	0.53	Betaproteobacteria	0.53			Rhodocyclales	0.49			Rhodocyclaceae	0.49	Sulfuritalea	0.18
Otu1052	0	0	0	0	0	0	0	0	0	0	0	0	0	0	0	0	0	0	0	0	0	0	0	0	0	0	0	0	0	0	n	Proteobacteria	1	Alphaproteobacteria	0.96			Sphingomonadales	0.96			Erythrobacteraceae	0.89	Croceicoccus	0.79
Otu1053	0	0	0	0	0	0	0	0	0	0	0	0	0	0	0	0	0	0	0	0	0	0	0	0	0	0	0	0	0	0	n	Proteobacteria	0.99	Alphaproteobacteria	0.91			Rhizobiales	0.57			Hyphomicrobiaceae	0.5	Cucumibacter	0.46
Otu1054	0	0	0	0	0	0	0	0	0	0	0	0	0	0	0	0	0	0	0	0	0	0	0	0	0	0	0	0	0	0	n	Proteobacteria	0.52	Alphaproteobacteria	0.52			Rhodospirillales	0.52			Acetobacteraceae	0.52	Paracraurococcus	0.18
Otu1055	0	0	0	0	0	0	0	0	0	0	0	0	0	0	0	0	0	0	0	0	0	0	0	0	0	0	0	0	0	0	n	Proteobacteria	1	Betaproteobacteria	1			Burkholderiales	0.93			Burkholderiaceae	0.53	Paucimonas	0.38
Otu1056	0	0	0	0	0	0	0	0	0	0	0	0	0	0	0	0	0	0	0	0	0	0	0	0	0	0	0	0	0	0	n	Actinobacteria	0.69	Actinobacteria	0.69	Actinobacteridae	0.65	Actinomycetales	0.65	Micrococcineae	0.48	Intrasporangiaceae	0.12	Ornithinicoccus	0.12
Otu1057	0	0	0	0	0	0	0	0	0	0	0	0	0	0	0	0	0	0	0	0	0	0	0	0	0	0	0	0	0	0	n	Proteobacteria	0.99	Betaproteobacteria	0.89			Burkholderiales	0.89			Burkholderiales_incertae_sedis	0.79	Ideonella	0.63
Otu1058	0	0	0	0	0	0	0	0	0	0	0	0	0	0	0	0	0	0	0	0	0	0	0	0	0	0	0	0	0	0	n	Proteobacteria	1	Betaproteobacteria	1			Burkholderiales	1			Comamonadaceae	0.99	Ramlibacter	0.6
Otu1059	0	0	0	0	0	0	0	0	0	0	0	0	0	0	0	0	0	0	0	0	0	0	0	0	0	0	0	0	0	0	n	Actinobacteria	1	Actinobacteria	1	Actinobacteridae	1	Actinomycetales	1	Frankineae	0.51	Cryptosporangiaceae	0.29	Jatrophihabitans	0.28
Otu106	1	21	8	14	20	0	0	0	1	1	2	0	0	3	0	2.84722e-05	0.000888287	0.000292912	0.000370959	0.000735619	0	0	0	2.49029e-05	2.0014e-05	2.93681e-05	0	0	5.22284e-05	0	n	Actinobacteria	1	Actinobacteria	1	Actinobacteridae	1	Actinomycetales	1	Corynebacterineae	1	Mycobacteriaceae	1	Mycobacterium	1
Otu1060	0	0	0	0	0	0	0	0	0	0	0	0	0	0	0	0	0	0	0	0	0	0	0	0	0	0	0	0	0	0	n	Proteobacteria	1	Betaproteobacteria	0.7			Burkholderiales	0.67			Oxalobacteraceae	0.62	Rugamonas	0.24
Otu1061	0	0	0	0	0	0	0	0	0	0	0	0	0	0	0	0	0	0	0	0	0	0	0	0	0	0	0	0	0	0	n	Nitrospirae	0.97	Nitrospira	0.97			"Nitrospirales"	0.97			"Nitrospiraceae"	0.97	Nitrospira	0.97
Otu1062	0	0	0	0	0	0	0	0	0	0	0	0	0	0	0	0	0	0	0	0	0	0	0	0	0	0	0	0	0	0	n	Proteobacteria	0.89	Alphaproteobacteria	0.85			Rickettsiales	0.62			Anaplasmataceae	0.49	Ehrlichia	0.32
Otu1063	16	16	4	47	26	40	15	4	5	0	18	3	1	13	11	0.000455555	0.00067679	0.000146456	0.00124536	0.000956304	0.00170568	0.00039265	0.000102741	0.000124514	0	0.000264313	7.109e-05	1.88729e-05	0.000226323	0.000194673	n	Proteobacteria	1	Betaproteobacteria	0.99			Burkholderiales	0.89			Oxalobacteraceae	0.86	Telluria	0.6
Otu1064	0	1	0	0	0	0	0	0	0	0	0	0	0	0	0	0	4.22994e-05	0	0	0	0	0	0	0	0	0	0	0	0	0	n	Proteobacteria	1	Alphaproteobacteria	0.97			Sphingomonadales	0.97			Sphingomonadaceae	0.97	Rhizorhabdus	0.97
Otu1065	0	0	0	0	0	0	0	0	0	0	0	0	0	0	0	0	0	0	0	0	0	0	0	0	0	0	0	0	0	0	n	Bacteroidetes	0.45	Flavobacteriia	0.45			"Flavobacteriales"	0.45			Flavobacteriaceae	0.45	Bergeyella	0.31
Otu1066	0	0	0	0	0	0	0	0	0	0	0	0	0	0	0	0	0	0	0	0	0	0	0	0	0	0	0	0	0	0	n	Proteobacteria	1	Betaproteobacteria	0.98			Burkholderiales	0.95			Oxalobacteraceae	0.91	Glaciimonas	0.29
Otu1067	0	0	0	0	0	0	0	0	0	0	0	0	0	0	0	0	0	0	0	0	0	0	0	0	0	0	0	0	0	0	n	Gemmatimonadetes	0.83	Gemmatimonadetes	0.83			Gemmatimonadales	0.83			Gemmatimonadaceae	0.83	Gemmatimonas	0.83
Otu1068	0	0	0	0	0	0	0	0	0	0	0	0	0	0	0	0	0	0	0	0	0	0	0	0	0	0	0	0	0	0	n	Proteobacteria	1	Betaproteobacteria	1			Nitrosomonadales	0.39			Spirillaceae	0.37	Spirillum	0.37
Otu1069	0	0	0	0	0	0	0	0	0	0	0	0	0	0	0	0	0	0	0	0	0	0	0	0	0	0	0	0	0	0	n	Acidobacteria	1	Acidobacteria_Gp3	1									Candidatus Solibacter	1
Otu107	0	0	0	0	0	0	0	0	0	0	0	0	0	0	0	0	0	0	0	0	0	0	0	0	0	0	0	0	0	0	n	Proteobacteria	1	Betaproteobacteria	1			Hydrogenophilales	0.25			Hydrogenophilaceae	0.25	Thiobacillus	0.25
Otu1070	0	0	0	0	0	0	0	0	0	0	0	0	0	0	0	0	0	0	0	0	0	0	0	0	0	0	0	0	0	0	n	Actinobacteria	1	Actinobacteria	1	Actinobacteridae	1	Actinomycetales	1	Pseudonocardineae	1	Pseudonocardiaceae	1	Kutzneria	0.94
Otu1071	0	0	0	0	0	12	4	2	1	0	0	0	0	0	0	0	0	0	0	0	0.000511705	0.000104707	5.13703e-05	2.49029e-05	0	0	0	0	0	0	n	Proteobacteria	1	Alphaproteobacteria	1			Caulobacterales	1			Caulobacteraceae	1	Caulobacter	1
Otu1072	0	0	0	0	0	0	0	0	0	0	0	0	0	0	0	0	0	0	0	0	0	0	0	0	0	0	0	0	0	0	n	Proteobacteria	0.83	Deltaproteobacteria	0.67			Myxococcales	0.24	Cystobacterineae	0.23	Vulgatibacteraceae	0.22	Vulgatibacter	0.22
Otu1073	0	0	0	0	0	0	0	0	0	0	0	0	0	0	0	0	0	0	0	0	0	0	0	0	0	0	0	0	0	0	n	Actinobacteria	0.33	Actinobacteria	0.33	Rubrobacteridae	0.3	Gaiellales	0.25			Gaiellaceae	0.25	Gaiella	0.25
Otu1074	0	0	0	0	0	0	0	0	0	0	0	0	0	0	0	0	0	0	0	0	0	0	0	0	0	0	0	0	0	0	n	Proteobacteria	0.85	Deltaproteobacteria	0.44			Desulfuromonadales	0.14			Geobacteraceae	0.14	Geothermobacter	0.14
Otu1075	0	0	0	0	0	0	0	0	0	0	0	0	0	0	0	0	0	0	0	0	0	0	0	0	0	0	0	0	0	0	n	Proteobacteria	0.99	Alphaproteobacteria	0.6			Rhizobiales	0.5			Rhodobiaceae	0.43	Dichotomicrobium	0.39
Otu1076	0	0	0	0	0	0	0	0	0	0	0	0	0	0	0	0	0	0	0	0	0	0	0	0	0	0	0	0	0	0	n	Bacteroidetes	1	Sphingobacteriia	1			"Sphingobacteriales"	1			Sphingobacteriaceae	1	Mucilaginibacter	0.8
Otu1077	0	0	0	0	0	0	0	0	0	0	0	0	0	0	0	0	0	0	0	0	0	0	0	0	0	0	0	0	0	0	n	Chloroflexi	0.31	Ardenticatenia	0.12			Ardenticatenales	0.12			Ardenticatenaceae	0.12	Ardenticatena	0.12
Otu1078	0	0	0	0	0	0	0	0	0	0	0	0	0	0	0	0	0	0	0	0	0	0	0	0	0	0	0	0	0	0	n	Proteobacteria	0.93	Alphaproteobacteria	0.64			Rhodospirillales	0.51			Rhodospirillaceae	0.44	Rhodospirillum	0.18
Otu1079	0	0	0	0	0	0	0	0	0	0	0	0	0	0	0	0	0	0	0	0	0	0	0	0	0	0	0	0	0	0	n	Chrysiogenetes	0.09	Chrysiogenetes	0.09			Chrysiogenales	0.09			Chrysiogenaceae	0.09	Chrysiogenes	0.04
Otu108	0	0	0	0	0	0	0	0	0	0	0	0	0	0	0	0	0	0	0	0	0	0	0	0	0	0	0	0	0	0	n	Acidobacteria	1	Acidobacteria_Gp5	1									Gp5	1
Otu1080	0	0	0	0	0	0	0	0	0	0	0	0	0	0	0	0	0	0	0	0	0	0	0	0	0	0	0	0	0	0	n	Proteobacteria	1	Alphaproteobacteria	1			Rhizobiales	1			Rhizobiales_incertae_sedis	0.48	Variibacter	0.48
Otu1081	0	0	0	0	0	0	0	0	0	0	0	0	0	0	0	0	0	0	0	0	0	0	0	0	0	0	0	0	0	0	n	Acidobacteria	0.64	Acidobacteria_Gp1	0.64									Acidipila	0.2
Otu1082	0	0	0	0	0	0	0	0	0	0	0	0	0	0	0	0	0	0	0	0	0	0	0	0	0	0	0	0	0	0	n	Firmicutes	0.98	Bacilli	0.94			Bacillales	0.92			Paenibacillaceae 1	0.63	Paenibacillus	0.35
Otu1083	0	0	0	0	0	0	0	0	0	0	0	0	0	0	0	0	0	0	0	0	0	0	0	0	0	0	0	0	0	0	n	Acidobacteria	0.6	Acidobacteria_Gp1	0.4									Candidatus Koribacter	0.18
Otu1084	0	0	0	0	0	0	0	0	0	0	0	0	0	0	0	0	0	0	0	0	0	0	0	0	0	0	0	0	0	0	n	Proteobacteria	0.88	Betaproteobacteria	0.73			Burkholderiales	0.67			Burkholderiaceae	0.34	Paucimonas	0.32
Otu1085	0	0	0	0	0	0	0	0	0	0	0	0	0	0	0	0	0	0	0	0	0	0	0	0	0	0	0	0	0	0	n	Actinobacteria	1	Actinobacteria	1	Actinobacteridae	1	Actinomycetales	1	Frankineae	0.17	Cryptosporangiaceae	0.12	Fodinicola	0.12
Otu1086	0	0	0	0	0	0	0	0	0	0	0	0	0	0	0	0	0	0	0	0	0	0	0	0	0	0	0	0	0	0	n	Proteobacteria	1	Alphaproteobacteria	1			Rhizobiales	0.96			Xanthobacteraceae	0.81	Pseudolabrys	0.81
Otu1087	0	0	0	0	0	0	0	0	1	0	13	3	11	7	3	0	0	0	0	0	0	0	0	2.49029e-05	0	0.000190893	7.109e-05	0.000207602	0.000121866	5.30926e-05	n	Proteobacteria	1	Betaproteobacteria	0.99			Burkholderiales	0.98			Burkholderiaceae	0.96	Pandoraea	0.53
Otu1088	0	0	0	0	0	0	0	0	0	0	0	0	0	0	0	0	0	0	0	0	0	0	0	0	0	0	0	0	0	0	n	Proteobacteria	1	Betaproteobacteria	0.99			Burkholderiales	0.98			Burkholderiaceae	0.58	Paucimonas	0.43
Otu1089	0	0	0	0	0	0	0	2	0	0	0	0	0	0	0	0	0	0	0	0	0	0	5.13703e-05	0	0	0	0	0	0	0	n	Proteobacteria	1	Alphaproteobacteria	0.86			Sphingomonadales	0.69			Sphingomonadaceae	0.66	Parasphingopyxis	0.56
Otu109	0	0	0	0	0	6	5	1	2	0	102	50	4	37	5	0	0	0	0	0	0.000255853	0.000130883	2.56852e-05	4.98058e-05	0	0.00149778	0.00118483	7.54916e-05	0.00064415	8.84877e-05	n	Actinobacteria	1	Actinobacteria	1	Actinobacteridae	1	Actinomycetales	1	Micrococcineae	1	Microbacteriaceae	1	Leifsonia	0.8
Otu1090	0	0	0	0	0	0	0	0	0	0	0	0	0	0	0	0	0	0	0	0	0	0	0	0	0	0	0	0	0	0	n	Proteobacteria	0.36	Alphaproteobacteria	0.34			Rhizobiales	0.26			Rhizobiales_incertae_sedis	0.25	Phreatobacter	0.25
Otu1091	0	0	0	0	0	0	0	0	0	0	0	0	0	0	0	0	0	0	0	0	0	0	0	0	0	0	0	0	0	0	n	Proteobacteria	0.47	Betaproteobacteria	0.36			Rhodocyclales	0.18			Rhodocyclaceae	0.18	Ferribacterium	0.13
Otu1092	0	0	0	0	0	0	0	0	0	0	0	0	0	0	0	0	0	0	0	0	0	0	0	0	0	0	0	0	0	0	n	Proteobacteria	0.89	Betaproteobacteria	0.64			Gallionellales	0.09			Gallionellaceae	0.09	Ferriphaselus	0.07
Otu1093	0	0	0	0	0	0	0	0	0	0	0	0	0	0	0	0	0	0	0	0	0	0	0	0	0	0	0	0	0	0	n	Proteobacteria	0.79	Betaproteobacteria	0.64			Burkholderiales	0.6			Burkholderiales_incertae_sedis	0.58	Piscinibacter	0.43
Otu1094	0	0	0	0	0	0	0	0	0	0	0	0	0	0	0	0	0	0	0	0	0	0	0	0	0	0	0	0	0	0	n	Proteobacteria	1	Alphaproteobacteria	1			Rhizobiales	0.86			Xanthobacteraceae	0.47	Pseudolabrys	0.47
Otu1095	0	0	0	0	0	0	0	0	0	0	0	0	0	0	0	0	0	0	0	0	0	0	0	0	0	0	0	0	0	0	n	Proteobacteria	1	Alphaproteobacteria	0.99			Caulobacterales	0.68			Caulobacteraceae	0.67	Phenylobacterium	0.63
Otu1096	0	0	0	0	0	0	0	0	0	0	0	0	0	0	0	0	0	0	0	0	0	0	0	0	0	0	0	0	0	0	n	Proteobacteria	0.43	Alphaproteobacteria	0.43			Rhodospirillales	0.43			Acetobacteraceae	0.43	Paracraurococcus	0.06
Otu1097	0	0	0	0	0	0	0	0	0	0	0	0	0	0	0	0	0	0	0	0	0	0	0	0	0	0	0	0	0	0	n	Proteobacteria	0.99	Betaproteobacteria	0.81			Burkholderiales	0.81			Comamonadaceae	0.65	Macromonas	0.25
Otu1098	0	0	0	0	0	18	6	8	2	0	1	0	0	7	0	0	0	0	0	0	0.000767558	0.00015706	0.000205481	4.98058e-05	0	1.46841e-05	0	0	0.000121866	0	n	Proteobacteria	1	Betaproteobacteria	1			Burkholderiales	0.93			Oxalobacteraceae	0.91	Telluria	0.48
Otu1099	0	0	0	0	0	0	0	0	0	0	0	0	0	0	0	0	0	0	0	0	0	0	0	0	0	0	0	0	0	0	n	Verrucomicrobia	1	Subdivision3	1									Subdivision3_genera_incertae_sedis	1
Otu110	0	0	0	0	0	0	0	0	0	0	0	0	0	0	0	0	0	0	0	0	0	0	0	0	0	0	0	0	0	0	n	Acidobacteria	1	Acidobacteria_Gp1	1									Gp1	0.78
Otu1100	0	0	0	0	0	0	0	0	0	0	0	0	0	0	0	0	0	0	0	0	0	0	0	0	0	0	0	0	0	0	n	Proteobacteria	1	Alphaproteobacteria	1			Sphingomonadales	0.81			Sphingomonadaceae	0.79	Sandaracinobacter	0.4
Otu1101	0	0	0	0	0	0	0	0	0	0	0	0	0	0	0	0	0	0	0	0	0	0	0	0	0	0	0	0	0	0	n	Proteobacteria	1	Alphaproteobacteria	0.99			Caulobacterales	0.38			Caulobacteraceae	0.38	Caulobacter	0.19
Otu1102	0	0	0	0	0	0	0	0	0	0	0	0	0	0	0	0	0	0	0	0	0	0	0	0	0	0	0	0	0	0	n	Proteobacteria	0.77	Alphaproteobacteria	0.72			Rhizobiales	0.72			Methylobacteriaceae	0.6	Psychroglaciecola	0.6
Otu1103	0	0	0	0	0	0	0	0	0	0	0	0	0	0	0	0	0	0	0	0	0	0	0	0	0	0	0	0	0	0	n	Proteobacteria	1	Alphaproteobacteria	1			Rhizobiales	0.67			Bradyrhizobiaceae	0.49	Tardiphaga	0.45
Otu1104	0	0	0	0	0	0	0	0	0	0	0	0	0	0	0	0	0	0	0	0	0	0	0	0	0	0	0	0	0	0	n	Bacteroidetes	0.86	Flavobacteriia	0.86			"Flavobacteriales"	0.86			Flavobacteriaceae	0.85	Lutaonella	0.25
Otu1105	0	0	0	0	0	0	0	0	0	0	0	0	0	0	0	0	0	0	0	0	0	0	0	0	0	0	0	0	0	0	n	Acidobacteria	0.78	Acidobacteria_Gp1	0.78									Acidipila	0.24
Otu1106	0	0	0	0	0	0	0	0	0	0	0	0	0	0	0	0	0	0	0	0	0	0	0	0	0	0	0	0	0	0	n	Proteobacteria	0.96	Gammaproteobacteria	0.94			Xanthomonadales	0.92			Xanthomonadaceae	0.92	Mizugakiibacter	0.33
Otu1107	0	0	0	0	0	0	0	0	0	0	0	0	0	0	0	0	0	0	0	0	0	0	0	0	0	0	0	0	0	0	n	Actinobacteria	0.48	Actinobacteria	0.48	Actinobacteridae	0.48	Actinomycetales	0.48	Micromonosporineae	0.12	Micromonosporaceae	0.12	Phytomonospora	0.11
Otu1108	0	0	0	0	0	0	0	0	0	0	0	0	0	0	0	0	0	0	0	0	0	0	0	0	0	0	0	0	0	0	n	Proteobacteria	1	Betaproteobacteria	0.92			Burkholderiales	0.34			Burkholderiaceae	0.26	Pandoraea	0.22
Otu1109	0	0	0	0	0	0	0	0	0	0	0	0	0	0	0	0	0	0	0	0	0	0	0	0	0	0	0	0	0	0	n	Chloroflexi	0.72	Thermomicrobia	0.22			Thermomicrobiales	0.18			Thermomicrobiaceae	0.18	Thermorudis	0.18
Otu111	0	0	0	0	0	0	0	0	0	0	0	0	0	0	0	0	0	0	0	0	0	0	0	0	0	0	0	0	0	0	n	Chloroflexi	0.49	Ardenticatenia	0.24			Ardenticatenales	0.24			Ardenticatenaceae	0.24	Ardenticatena	0.24
Otu1110	0	0	0	0	0	0	0	0	0	0	0	0	0	0	0	0	0	0	0	0	0	0	0	0	0	0	0	0	0	0	n	Proteobacteria	0.99	Alphaproteobacteria	0.94			Rhizobiales	0.74			Bradyrhizobiaceae	0.72	Oligotropha	0.58
Otu1111	0	0	0	0	0	0	0	0	0	0	0	0	0	0	0	0	0	0	0	0	0	0	0	0	0	0	0	0	0	0	n	Proteobacteria	0.46	Alphaproteobacteria	0.38			Rhizobiales	0.36			Rhodobiaceae	0.36	Methyloceanibacter	0.3
Otu1112	0	0	0	0	0	0	0	0	0	0	0	0	0	0	0	0	0	0	0	0	0	0	0	0	0	0	0	0	0	0	n	Proteobacteria	0.99	Gammaproteobacteria	0.97			Xanthomonadales	0.97			Xanthomonadaceae	0.97	Rudaea	0.19
Otu1113	0	0	0	0	0	0	0	0	0	0	0	0	0	0	0	0	0	0	0	0	0	0	0	0	0	0	0	0	0	0	n	Proteobacteria	0.86	Deltaproteobacteria	0.44			Myxococcales	0.23			Sandaracinaceae	0.19	Sandaracinus	0.19
Otu1114	0	0	0	0	0	0	0	0	0	0	0	0	0	0	0	0	0	0	0	0	0	0	0	0	0	0	0	0	0	0	n	Proteobacteria	0.99	Gammaproteobacteria	0.85			Xanthomonadales	0.85			Xanthomonadaceae	0.85	Fulvimonas	0.38
Otu1115	0	0	0	0	0	0	0	0	0	0	0	0	0	0	0	0	0	0	0	0	0	0	0	0	0	0	0	0	0	0	n	Proteobacteria	0.99	Deltaproteobacteria	0.95			Myxococcales	0.9	Cystobacterineae	0.86	Cystobacteraceae	0.48	Anaeromyxobacter	0.36
Otu1116	0	0	0	0	0	0	0	0	0	0	0	0	0	0	0	0	0	0	0	0	0	0	0	0	0	0	0	0	0	0	n	Proteobacteria	1	Alphaproteobacteria	1			Rhizobiales	1			Hyphomicrobiaceae	0.93	Pelagibacterium	0.56
Otu1117	0	0	0	0	0	0	0	0	0	0	0	0	0	0	0	0	0	0	0	0	0	0	0	0	0	0	0	0	0	0	n	Proteobacteria	0.83	Alphaproteobacteria	0.81			Sphingomonadales	0.64			Sphingomonadaceae	0.64	Sandaracinobacter	0.19
Otu1118	0	0	0	0	0	14	0	4	1	0	38	28	24	36	7	0	0	0	0	0	0.000596989	0	0.000102741	2.49029e-05	0	0.000557995	0.000663507	0.00045295	0.000626741	0.000123883	n	Proteobacteria	1	Betaproteobacteria	1			Burkholderiales	0.94			Oxalobacteraceae	0.86	Massilia	0.37
Otu1119	0	0	0	0	0	0	0	0	0	0	0	0	0	0	0	0	0	0	0	0	0	0	0	0	0	0	0	0	0	0	n	Gemmatimonadetes	0.83	Gemmatimonadetes	0.83			Gemmatimonadales	0.83			Gemmatimonadaceae	0.83	Gemmatimonas	0.83
Otu112	1	0	0	0	0	0	0	0	0	0	0	0	0	0	0	2.84722e-05	0	0	0	0	0	0	0	0	0	0	0	0	0	0	n	Proteobacteria	1	Betaproteobacteria	1			Neisseriales	0.19			Neisseriaceae	0.19	Pseudogulbenkiania	0.12
Otu1120	0	0	0	0	0	0	0	0	0	0	0	0	0	0	0	0	0	0	0	0	0	0	0	0	0	0	0	0	0	0	n	Proteobacteria	1	Betaproteobacteria	0.95			Burkholderiales	0.56			Alcaligenaceae	0.18	Paralcaligenes	0.16
Otu1121	0	0	0	0	0	0	0	0	0	0	0	0	0	0	0	0	0	0	0	0	0	0	0	0	0	0	0	0	0	0	n	Proteobacteria	1	Betaproteobacteria	1			Burkholderiales	1			Comamonadaceae	1	Pseudorhodoferax	0.8
Otu1122	0	0	0	0	0	0	0	0	0	0	0	0	0	0	0	0	0	0	0	0	0	0	0	0	0	0	0	0	0	0	n	Bacteroidetes	1	Sphingobacteriia	0.93			"Sphingobacteriales"	0.93			Chitinophagaceae	0.93	Heliimonas	0.53
Otu1123	0	0	0	0	0	0	0	0	0	0	0	0	0	0	0	0	0	0	0	0	0	0	0	0	0	0	0	0	0	0	n	Proteobacteria	1	Alphaproteobacteria	1			Rhodospirillales	1			Acetobacteraceae	1	Roseomonas	0.93
Otu1124	0	0	0	0	0	0	0	0	0	0	0	0	0	0	0	0	0	0	0	0	0	0	0	0	0	0	0	0	0	0	n	Proteobacteria	1	Alphaproteobacteria	0.93			Rhizobiales	0.92			Methylocystaceae	0.28	Methylosinus	0.28
Otu1125	0	0	0	0	0	0	0	0	0	0	0	0	0	0	0	0	0	0	0	0	0	0	0	0	0	0	0	0	0	0	n	Acidobacteria	0.68	Acidobacteria_Gp3	0.68									Candidatus Solibacter	0.68
Otu1126	0	0	0	0	0	0	0	0	0	0	0	0	0	0	0	0	0	0	0	0	0	0	0	0	0	0	0	0	0	0	n	Chloroflexi	0.73	Thermoflexia	0.36			Thermoflexales	0.36			Thermoflexaceae	0.36	Thermoflexus	0.36
Otu1127	0	0	0	0	0	0	0	0	0	0	0	0	0	0	0	0	0	0	0	0	0	0	0	0	0	0	0	0	0	0	n	Proteobacteria	1	Betaproteobacteria	1			Burkholderiales	0.98			Oxalobacteraceae	0.91	Janthinobacterium	0.28
Otu1128	0	0	0	0	0	0	0	0	0	0	0	0	0	0	0	0	0	0	0	0	0	0	0	0	0	0	0	0	0	0	n	Proteobacteria	0.43	Alphaproteobacteria	0.34			Rhizobiales	0.31			Beijerinckiaceae	0.1	Methyloferula	0.07
Otu1129	0	0	0	0	0	0	0	0	0	0	0	0	0	0	0	0	0	0	0	0	0	0	0	0	0	0	0	0	0	0	n	Actinobacteria	0.81	Actinobacteria	0.81	Actinobacteridae	0.81	Actinomycetales	0.8	Micrococcineae	0.8	Microbacteriaceae	0.78	Lysinimonas	0.71
Otu113	0	0	0	0	0	0	0	0	0	0	0	0	0	0	0	0	0	0	0	0	0	0	0	0	0	0	0	0	0	0	n	Planctomycetes	0.86	Phycisphaerae	0.81			Phycisphaerales	0.74			Phycisphaeraceae	0.74	Phycisphaera	0.74
Otu1130	0	0	0	0	0	0	0	0	0	0	0	0	0	0	0	0	0	0	0	0	0	0	0	0	0	0	0	0	0	0	n	Proteobacteria	1	Alphaproteobacteria	1			Caulobacterales	0.72			Caulobacteraceae	0.72	Asticcacaulis	0.54
Otu1131	0	0	0	0	0	0	0	0	0	0	0	0	0	0	0	0	0	0	0	0	0	0	0	0	0	0	0	0	0	0	n	Proteobacteria	0.81	Alphaproteobacteria	0.81			Sphingomonadales	0.77			Sphingomonadaceae	0.76	Polymorphobacter	0.53
Otu1132	0	0	0	0	2	0	0	1	0	1	6	3	6	10	3	0	0	0	0	7.35619e-05	0	0	2.56852e-05	0	2.0014e-05	8.81044e-05	7.109e-05	0.000113237	0.000174095	5.30926e-05	n	Proteobacteria	1	Betaproteobacteria	1			Burkholderiales	1			Oxalobacteraceae	0.94	Noviherbaspirillum	0.83
Otu1133	0	0	0	0	0	0	0	0	0	0	0	0	0	0	0	0	0	0	0	0	0	0	0	0	0	0	0	0	0	0	n	Proteobacteria	0.87	Alphaproteobacteria	0.81			Rhizobiales	0.81			Bradyrhizobiaceae	0.79	Tardiphaga	0.79
Otu1134	0	0	0	0	0	0	0	0	0	0	0	0	0	0	0	0	0	0	0	0	0	0	0	0	0	0	0	0	0	0	n	Proteobacteria	0.71	Alphaproteobacteria	0.58			Rhizobiales	0.56			Xanthobacteraceae	0.3	Pseudolabrys	0.3
Otu1135	0	0	0	0	0	0	0	0	0	0	0	0	0	0	0	0	0	0	0	0	0	0	0	0	0	0	0	0	0	0	n	Proteobacteria	0.97	Alphaproteobacteria	0.7			Rhizobiales	0.31			Hyphomicrobiaceae	0.2	Aquabacter	0.18
Otu1136	0	0	0	0	0	0	0	0	0	0	1	0	0	0	0	0	0	0	0	0	0	0	0	0	0	1.46841e-05	0	0	0	0	n	Proteobacteria	1	Alphaproteobacteria	1			Rhizobiales	0.99			Rhizobiales_incertae_sedis	0.91	Variibacter	0.91
Otu1137	0	0	0	0	0	0	0	0	0	0	0	0	0	0	0	0	0	0	0	0	0	0	0	0	0	0	0	0	0	0	n	Proteobacteria	1	Betaproteobacteria	0.99			Burkholderiales	0.61			Alcaligenaceae	0.42	Paralcaligenes	0.06
Otu1138	0	0	0	0	0	0	0	0	0	0	0	0	0	0	0	0	0	0	0	0	0	0	0	0	0	0	0	0	0	0	n	Proteobacteria	1	Alphaproteobacteria	1			Rhizobiales	0.99			Methylocystaceae	0.62	Hansschlegelia	0.62
Otu1139	0	0	0	0	0	0	0	0	0	0	0	0	0	0	0	0	0	0	0	0	0	0	0	0	0	0	0	0	0	0	n	Proteobacteria	1	Betaproteobacteria	0.6			Burkholderiales	0.58			Burkholderiaceae	0.38	Pandoraea	0.28
Otu114	0	0	0	0	0	64	113	46	44	7	0	0	0	0	0	0	0	0	0	0	0.00272909	0.00295796	0.00118152	0.00109573	0.000140098	0	0	0	0	0	n	Actinobacteria	1	Actinobacteria	1	Actinobacteridae	1	Actinomycetales	1	Propionibacterineae	0.97	Nocardioidaceae	0.97	Nocardioides	0.9
Otu1140	0	0	0	0	0	0	0	0	0	0	0	0	0	0	0	0	0	0	0	0	0	0	0	0	0	0	0	0	0	0	n	Acidobacteria	0.83	Acidobacteria_Gp3	0.64									Candidatus Solibacter	0.63
Otu1141	0	0	0	0	0	0	0	0	0	0	0	0	0	0	0	0	0	0	0	0	0	0	0	0	0	0	0	0	0	0	n	Proteobacteria	0.85	Betaproteobacteria	0.8			Burkholderiales	0.8			Burkholderiales_incertae_sedis	0.58	Methylibium	0.25
Otu1142	0	0	0	0	0	0	0	0	0	0	0	0	0	0	0	0	0	0	0	0	0	0	0	0	0	0	0	0	0	0	n	Firmicutes	0.23	Clostridia	0.2			Thermoanaerobacterales	0.15			Thermodesulfobiaceae	0.13	Thermodesulfobium	0.13
Otu1143	0	0	0	0	0	0	0	0	0	0	0	0	0	0	0	0	0	0	0	0	0	0	0	0	0	0	0	0	0	0	n	Proteobacteria	0.88	Betaproteobacteria	0.88			Nitrosomonadales	0.44			Nitrosomonadaceae	0.44	Nitrosospira	0.44
Otu1144	0	0	0	0	0	0	0	0	0	0	0	0	0	0	0	0	0	0	0	0	0	0	0	0	0	0	0	0	0	0	n	Chloroflexi	0.94	Ktedonobacteria	0.92			Ktedonobacterales	0.86			Thermosporotrichaceae	0.7	Thermosporothrix	0.7
Otu1145	0	0	0	0	0	0	0	0	0	0	0	0	0	0	0	0	0	0	0	0	0	0	0	0	0	0	0	0	0	0	n	Acidobacteria	0.53	Acidobacteria_Gp1	0.32									Candidatus Koribacter	0.28
Otu1146	0	0	0	0	0	0	0	0	0	0	0	0	0	0	0	0	0	0	0	0	0	0	0	0	0	0	0	0	0	0	n	Proteobacteria	0.89	Betaproteobacteria	0.75			Burkholderiales	0.32			Alcaligenaceae	0.21	Paralcaligenes	0.05
Otu1147	0	0	0	0	0	0	0	0	0	0	0	0	0	0	0	0	0	0	0	0	0	0	0	0	0	0	0	0	0	0	n	Proteobacteria	1	Alphaproteobacteria	1			Rhodospirillales	0.95			Rhodospirillaceae	0.93	Dongia	0.88
Otu1148	0	0	0	0	0	0	0	0	0	0	0	0	0	0	0	0	0	0	0	0	0	0	0	0	0	0	0	0	0	0	n	Acidobacteria	0.93	Acidobacteria_Gp3	0.89									Bryobacter	0.78
Otu1149	0	0	0	0	0	0	0	0	0	0	0	0	0	0	0	0	0	0	0	0	0	0	0	0	0	0	0	0	0	0	n	Proteobacteria	0.84	Alphaproteobacteria	0.5			Alphaproteobacteria_incertae_sedis	0.17					Geminicoccus	0.17
Otu115	0	0	0	0	0	0	0	0	0	0	0	0	0	0	0	0	0	0	0	0	0	0	0	0	0	0	0	0	0	0	n	Verrucomicrobia	1	Subdivision3	1									Subdivision3_genera_incertae_sedis	0.98
Otu1150	0	0	0	0	0	0	0	0	0	0	0	0	0	0	0	0	0	0	0	0	0	0	0	0	0	0	0	0	0	0	n	Proteobacteria	0.41	Gammaproteobacteria	0.3			Xanthomonadales	0.09			Xanthomonadaceae	0.09	Mizugakiibacter	0.09
Otu1151	0	0	0	0	0	0	0	0	0	0	0	0	0	0	0	0	0	0	0	0	0	0	0	0	0	0	0	0	0	0	n	Gemmatimonadetes	0.83	Gemmatimonadetes	0.83			Gemmatimonadales	0.83			Gemmatimonadaceae	0.83	Gemmatimonas	0.83
Otu1152	0	0	0	0	0	0	0	0	0	0	0	0	0	0	0	0	0	0	0	0	0	0	0	0	0	0	0	0	0	0	n	Acidobacteria	0.55	Acidobacteria_Gp1	0.13									Acidipila	0.08
Otu1153	0	0	0	0	0	0	0	0	0	0	0	0	0	0	0	0	0	0	0	0	0	0	0	0	0	0	0	0	0	0	n	Proteobacteria	0.95	Alphaproteobacteria	0.83			Rhodospirillales	0.83			Acetobacteraceae	0.83	Rhodopila	0.45
Otu1154	0	0	0	0	0	0	0	0	0	0	0	0	0	0	0	0	0	0	0	0	0	0	0	0	0	0	0	0	0	0	n	Verrucomicrobia	0.58	Subdivision3	0.41									Subdivision3_genera_incertae_sedis	0.4
Otu1155	0	0	0	0	0	0	0	0	0	0	0	0	0	0	0	0	0	0	0	0	0	0	0	0	0	0	0	0	0	0	n	Acidobacteria	0.46	Acidobacteria_Gp4	0.11									Pyrinomonas	0.11
Otu1156	0	0	0	0	0	0	0	0	0	0	0	0	0	0	0	0	0	0	0	0	0	0	0	0	0	0	0	0	0	0	n	Actinobacteria	0.59	Actinobacteria	0.59	Acidimicrobidae	0.45	Acidimicrobiales	0.45	"Acidimicrobineae"	0.45	"Acidimicrobineae"_incertae_sedis	0.33	Aciditerrimonas	0.33
Otu1157	0	0	0	0	0	0	0	0	0	0	0	0	0	0	0	0	0	0	0	0	0	0	0	0	0	0	0	0	0	0	n	Firmicutes	1	Bacilli	1			Bacillales	1			Planococcaceae	1	Lysinibacillus	1
Otu1158	0	0	0	0	0	0	0	0	0	0	0	0	0	0	0	0	0	0	0	0	0	0	0	0	0	0	0	0	0	0	n	Proteobacteria	0.89	Betaproteobacteria	0.67			Sulfuricellales	0.11			Sulfuricellaceae	0.11	Sulfuricella	0.11
Otu1159	0	0	0	0	0	0	0	0	0	0	0	0	0	0	0	0	0	0	0	0	0	0	0	0	0	0	0	0	0	0	n	Proteobacteria	0.89	Gammaproteobacteria	0.82			Pseudomonadales	0.51			Pseudomonadaceae	0.51	Serpens	0.24
Otu116	0	0	0	0	0	0	0	0	0	0	0	0	0	0	0	0	0	0	0	0	0	0	0	0	0	0	0	0	0	0	n	Proteobacteria	1	Betaproteobacteria	0.94			Burkholderiales	0.94			Burkholderiales_incertae_sedis	0.93	Piscinibacter	0.9
Otu1160	0	0	0	0	0	0	0	0	0	0	0	0	0	0	0	0	0	0	0	0	0	0	0	0	0	0	0	0	0	0	n	Bacteroidetes	0.81	Flavobacteriia	0.81			"Flavobacteriales"	0.81			Flavobacteriaceae	0.81	Gilvibacter	0.15
Otu1161	0	0	0	0	0	0	0	0	0	0	0	0	0	0	0	0	0	0	0	0	0	0	0	0	0	0	0	0	0	0	n	Proteobacteria	0.57	Alphaproteobacteria	0.55			Rhodospirillales	0.53			Acetobacteraceae	0.52	Rhodovarius	0.19
Otu1162	0	0	0	0	0	0	0	0	0	0	0	0	0	0	0	0	0	0	0	0	0	0	0	0	0	0	0	0	0	0	n	Proteobacteria	1	Betaproteobacteria	0.77			Rhodocyclales	0.48			Rhodocyclaceae	0.48	Ferribacterium	0.34
Otu1163	0	0	0	0	0	0	0	0	0	0	0	0	0	0	0	0	0	0	0	0	0	0	0	0	0	0	0	0	0	0	n	Proteobacteria	0.64	Gammaproteobacteria	0.63			Pseudomonadales	0.4			Pseudomonadaceae	0.4	Azomonas	0.36
Otu1164	0	0	0	0	0	0	0	0	0	0	0	0	0	0	0	0	0	0	0	0	0	0	0	0	0	0	0	0	0	0	n	Bacteroidetes	1	Sphingobacteriia	1			"Sphingobacteriales"	1			Chitinophagaceae	1	Flavihumibacter	0.88
Otu1165	0	0	0	0	0	0	0	0	0	0	0	0	0	0	0	0	0	0	0	0	0	0	0	0	0	0	0	0	0	0	n	Proteobacteria	1	Alphaproteobacteria	1			Rhodospirillales	1			Acetobacteraceae	1	Roseomonas	1
Otu1166	0	0	0	0	0	0	0	0	0	0	0	0	0	0	0	0	0	0	0	0	0	0	0	0	0	0	0	0	0	0	n	Actinobacteria	1	Actinobacteria	1	Acidimicrobidae	0.97	Acidimicrobiales	0.97	"Acidimicrobineae"	0.97	Iamiaceae	0.81	Iamia	0.68
Otu1167	0	0	0	0	0	0	0	0	0	0	0	0	0	0	0	0	0	0	0	0	0	0	0	0	0	0	0	0	0	0	n	Acidobacteria	1	Acidobacteria_Gp3	1									Bryobacter	0.5
Otu1168	0	0	0	0	0	0	0	0	0	0	0	0	0	0	0	0	0	0	0	0	0	0	0	0	0	0	0	0	0	0	n	Deinococcus-Thermus	0.27	Deinococci	0.27			Deinococcales	0.2			Trueperaceae	0.2	Truepera	0.2
Otu1169	0	0	0	0	0	0	0	0	0	0	0	0	0	0	0	0	0	0	0	0	0	0	0	0	0	0	0	0	0	0	n	Firmicutes	0.95	Bacilli	0.5			Bacillales	0.5			Bacillaceae 1	0.31	Falsibacillus	0.25
Otu117	0	0	0	0	0	0	0	0	0	0	0	0	0	0	0	0	0	0	0	0	0	0	0	0	0	0	0	0	0	0	n	Proteobacteria	1	Alphaproteobacteria	1			Rhizobiales	1			Methylocystaceae	0.81	Methylosinus	0.43
Otu1170	0	0	0	0	0	0	0	0	0	0	0	0	0	0	0	0	0	0	0	0	0	0	0	0	0	0	0	0	0	0	n	Proteobacteria	0.98	Alphaproteobacteria	0.92			Rhodospirillales	0.9			Acetobacteraceae	0.73	Rubritepida	0.1
Otu1171	0	0	0	0	0	0	0	0	0	0	0	0	0	0	0	0	0	0	0	0	0	0	0	0	0	0	0	0	0	0	n	Acidobacteria	0.97	Acidobacteria_Gp2	0.82									Gp2	0.82
Otu1172	0	0	0	0	0	0	0	0	0	0	0	0	0	2	2	0	0	0	0	0	0	0	0	0	0	0	0	0	3.48189e-05	3.53951e-05	n	Proteobacteria	1	Betaproteobacteria	1			Hydrogenophilales	0.46			Hydrogenophilaceae	0.46	Thiobacillus	0.46
Otu1173	0	0	0	0	0	0	0	0	0	0	0	0	0	0	0	0	0	0	0	0	0	0	0	0	0	0	0	0	0	0	n	Actinobacteria	0.98	Actinobacteria	0.97	Rubrobacteridae	0.97	Solirubrobacterales	0.91			Conexibacteraceae	0.72	Conexibacter	0.72
Otu1174	0	0	0	0	0	0	0	0	0	0	0	0	0	0	0	0	0	0	0	0	0	0	0	0	0	0	0	0	0	0	n	Acidobacteria	0.98	Acidobacteria_Gp3	0.98									Candidatus Solibacter	0.98
Otu1175	0	0	0	0	0	0	0	0	0	0	0	0	0	0	0	0	0	0	0	0	0	0	0	0	0	0	0	0	0	0	n	Proteobacteria	0.56	Betaproteobacteria	0.52			Nitrosomonadales	0.39			Nitrosomonadaceae	0.36	Nitrosospira	0.36
Otu1176	0	0	0	0	0	0	0	0	0	0	0	0	0	0	0	0	0	0	0	0	0	0	0	0	0	0	0	0	0	0	n	Proteobacteria	0.88	Alphaproteobacteria	0.71			Sneathiellales	0.23			Sneathiellaceae	0.23	Ferrovibrio	0.18
Otu1177	0	0	0	0	0	0	0	0	0	0	0	0	0	0	0	0	0	0	0	0	0	0	0	0	0	0	0	0	0	0	n	Proteobacteria	1	Alphaproteobacteria	1			Caulobacterales	0.84			Caulobacteraceae	0.66	Asticcacaulis	0.45
Otu1178	0	0	0	0	0	0	0	0	0	0	0	0	0	0	0	0	0	0	0	0	0	0	0	0	0	0	0	0	0	0	n	Actinobacteria	0.99	Actinobacteria	0.99	Actinobacteridae	0.99	Actinomycetales	0.99	Frankineae	0.73	Cryptosporangiaceae	0.45	Jatrophihabitans	0.45
Otu1179	0	0	0	0	0	0	0	0	0	0	0	0	0	0	0	0	0	0	0	0	0	0	0	0	0	0	0	0	0	0	n	Bacteroidetes	1	Flavobacteriia	1			"Flavobacteriales"	1			Flavobacteriaceae	1	Flavobacterium	0.59
Otu118	0	0	0	0	0	0	0	0	0	0	0	0	0	0	0	0	0	0	0	0	0	0	0	0	0	0	0	0	0	0	n	Proteobacteria	1	Alphaproteobacteria	1			Rhizobiales	1			Rhizobiaceae	0.23	Kaistia	0.23
Otu1180	0	0	0	0	0	0	0	0	0	0	0	0	0	0	0	0	0	0	0	0	0	0	0	0	0	0	0	0	0	0	n	Proteobacteria	0.87	Deltaproteobacteria	0.81			Bdellovibrionales	0.64			Bacteriovoracaceae	0.64	Bacteriovorax	0.62
Otu1181	0	0	0	0	0	0	0	0	0	0	0	0	0	0	0	0	0	0	0	0	0	0	0	0	0	0	0	0	0	0	n	Proteobacteria	0.76	Deltaproteobacteria	0.46			Myxococcales	0.38	Cystobacterineae	0.27	Cystobacteraceae	0.26	Anaeromyxobacter	0.26
Otu1182	0	0	0	0	0	0	0	0	0	0	0	0	0	0	0	0	0	0	0	0	0	0	0	0	0	0	0	0	0	0	n	Proteobacteria	0.57	Alphaproteobacteria	0.57			Rhizobiales	0.52			Rhizobiales_incertae_sedis	0.3	Vasilyevaea	0.28
Otu1183	0	0	0	0	0	0	0	0	0	0	0	0	0	0	0	0	0	0	0	0	0	0	0	0	0	0	0	0	0	0	n	Proteobacteria	0.99	Alphaproteobacteria	0.9			Sphingomonadales	0.82			Sphingomonadaceae	0.44	Novosphingobium	0.4
Otu1184	0	0	0	0	0	0	0	0	0	0	0	0	0	0	0	0	0	0	0	0	0	0	0	0	0	0	0	0	0	0	n	Proteobacteria	1	Gammaproteobacteria	0.9			Xanthomonadales	0.9			Xanthomonadaceae	0.9	Vulcaniibacterium	0.49
Otu1185	0	0	0	0	0	6	0	6	0	0	0	0	0	0	0	0	0	0	0	0	0.000255853	0	0.000154111	0	0	0	0	0	0	0	n	Proteobacteria	1	Betaproteobacteria	1			Burkholderiales	0.44			Burkholderiaceae	0.3	Paucimonas	0.09
Otu1186	0	0	0	0	0	0	0	0	0	0	0	0	0	0	0	0	0	0	0	0	0	0	0	0	0	0	0	0	0	0	n	Proteobacteria	0.89	Betaproteobacteria	0.85			Rhodocyclales	0.29			Rhodocyclaceae	0.29	Azovibrio	0.1
Otu1187	0	0	0	0	0	0	0	0	0	0	0	0	0	0	0	0	0	0	0	0	0	0	0	0	0	0	0	0	0	0	n	Actinobacteria	0.39	Actinobacteria	0.38	Rubrobacteridae	0.13	Gaiellales	0.13			Gaiellaceae	0.13	Gaiella	0.13
Otu1188	0	0	0	0	0	0	0	0	0	0	0	0	0	0	0	0	0	0	0	0	0	0	0	0	0	0	0	0	0	0	n	Proteobacteria	1	Betaproteobacteria	0.95			Burkholderiales	0.77			Oxalobacteraceae	0.32	Pseudoduganella	0.14
Otu1189	0	0	0	0	0	0	0	0	0	0	0	0	0	0	0	0	0	0	0	0	0	0	0	0	0	0	0	0	0	0	n	Proteobacteria	0.89	Betaproteobacteria	0.89			Burkholderiales	0.76			Oxalobacteraceae	0.75	Paraherbaspirillum	0.18
Otu119	0	0	0	0	0	260	111	114	29	2	0	0	0	0	0	0	0	0	0	0	0.0110869	0.00290561	0.00292811	0.000722183	4.0028e-05	0	0	0	0	0	n	Proteobacteria	1	Alphaproteobacteria	1			Rhizobiales	1			Bradyrhizobiaceae	1	Rhodopseudomonas	0.46
Otu1190	0	0	0	0	0	0	0	0	0	0	0	0	0	0	0	0	0	0	0	0	0	0	0	0	0	0	0	0	0	0	n	Bacteroidetes	1	Flavobacteriia	0.21			"Flavobacteriales"	0.21			Cryomorphaceae	0.21	Wandonia	0.18
Otu1191	0	0	0	0	0	0	0	0	0	0	0	0	0	0	0	0	0	0	0	0	0	0	0	0	0	0	0	0	0	0	n	Bacteroidetes	1	Cytophagia	1			Cytophagales	1					Ohtaekwangia	0.74
Otu1192	0	0	0	0	0	0	0	0	0	0	0	0	0	0	0	0	0	0	0	0	0	0	0	0	0	0	0	0	0	0	n	Proteobacteria	0.94	Deltaproteobacteria	0.83			Myxococcales	0.76	Nannocystineae	0.61	"Haliangiaceae"	0.46	Haliangium	0.46
Otu1193	0	0	0	0	0	0	0	0	0	0	0	0	0	0	0	0	0	0	0	0	0	0	0	0	0	0	0	0	0	0	n	Proteobacteria	1	Alphaproteobacteria	1			Caulobacterales	0.92			Caulobacteraceae	0.92	Caulobacter	0.33
Otu1194	0	0	0	0	0	0	0	0	0	0	0	0	0	0	0	0	0	0	0	0	0	0	0	0	0	0	0	0	0	0	n	Proteobacteria	0.81	Alphaproteobacteria	0.79			Sphingomonadales	0.48			Erythrobacteraceae	0.2	Erythromicrobium	0.2
Otu1195	0	0	0	0	0	0	0	0	0	0	0	0	0	0	0	0	0	0	0	0	0	0	0	0	0	0	0	0	0	0	n	Acidobacteria	1	Acidobacteria_Gp1	1									Acidipila	0.99
Otu1196	0	0	0	0	0	0	0	0	0	0	0	0	0	0	0	0	0	0	0	0	0	0	0	0	0	0	0	0	0	0	n	Actinobacteria	1	Actinobacteria	1	Actinobacteridae	1	Actinomycetales	1	Kineosporiineae	1	Kineosporiaceae	1	Angustibacter	1
Otu1197	0	0	0	0	0	0	0	0	0	0	0	0	0	0	0	0	0	0	0	0	0	0	0	0	0	0	0	0	0	0	n	Actinobacteria	0.44	Actinobacteria	0.44	Rubrobacteridae	0.42	Solirubrobacterales	0.42			Solirubrobacteraceae	0.42	Solirubrobacter	0.42
Otu1198	0	0	0	0	0	0	0	0	0	0	0	0	0	0	0	0	0	0	0	0	0	0	0	0	0	0	0	0	0	0	n	Acidobacteria	0.2	Acidobacteria_Gp3	0.19									Bryobacter	0.17
Otu1199	0	0	0	0	0	0	0	0	0	0	0	0	0	0	0	0	0	0	0	0	0	0	0	0	0	0	0	0	0	0	n	Proteobacteria	1	Betaproteobacteria	0.75			Burkholderiales	0.56			Burkholderiaceae	0.48	Paucimonas	0.16
Otu120	0	0	0	0	0	0	0	0	0	0	0	0	0	0	0	0	0	0	0	0	0	0	0	0	0	0	0	0	0	0	n	Firmicutes	1	Bacilli	1			Bacillales	1			Paenibacillaceae 1	1	Paenibacillus	1
Otu1200	0	0	0	0	0	0	0	0	0	0	0	0	0	0	0	0	0	0	0	0	0	0	0	0	0	0	0	0	0	0	n	Deinococcus-Thermus	0.41	Deinococci	0.41			Deinococcales	0.41			Trueperaceae	0.41	Truepera	0.41
Otu1201	0	0	0	0	0	0	0	0	0	0	0	0	0	0	0	0	0	0	0	0	0	0	0	0	0	0	0	0	0	0	n	Proteobacteria	0.8	Alphaproteobacteria	0.78			Rhizobiales	0.4			Beijerinckiaceae	0.15	Methylorosula	0.12
Otu1202	0	0	0	0	0	0	0	0	0	0	0	0	0	0	0	0	0	0	0	0	0	0	0	0	0	0	0	0	0	0	n	Proteobacteria	0.96	Betaproteobacteria	0.5			Burkholderiales	0.46			Comamonadaceae	0.43	Alicycliphilus	0.34
Otu1203	0	0	0	0	0	0	0	0	0	0	0	0	0	0	0	0	0	0	0	0	0	0	0	0	0	0	0	0	0	0	n	Proteobacteria	1	Alphaproteobacteria	0.99			Rhodospirillales	0.74			Rhodospirillaceae	0.67	Oceanibaculum	0.34
Otu1204	0	0	0	0	0	0	0	0	0	0	0	0	0	0	0	0	0	0	0	0	0	0	0	0	0	0	0	0	0	0	n	Actinobacteria	0.62	Actinobacteria	0.62	Actinobacteridae	0.62	Actinomycetales	0.62	Pseudonocardineae	0.5	Pseudonocardiaceae	0.5	Labedaea	0.45
Otu1205	0	0	0	0	0	0	0	0	0	0	0	0	0	0	0	0	0	0	0	0	0	0	0	0	0	0	0	0	0	0	n	Armatimonadetes	1	Armatimonadia	0.96			Armatimonadales	0.96			Armatimonadaceae	0.96	Armatimonas/Armatimonadetes_gp1	0.96
Otu1206	0	0	0	0	0	0	0	0	0	0	0	0	0	0	0	0	0	0	0	0	0	0	0	0	0	0	0	0	0	0	n	Proteobacteria	0.82	Betaproteobacteria	0.81			Burkholderiales	0.71			Alcaligenaceae	0.27	Brackiella	0.19
Otu1207	0	0	0	0	0	0	0	0	0	0	0	0	0	0	0	0	0	0	0	0	0	0	0	0	0	0	0	0	0	0	n	Proteobacteria	1	Gammaproteobacteria	1			Oceanospirillales	0.91			Oceanospirillaceae	0.64	Nitrincola	0.38
Otu1208	0	0	0	0	0	0	0	0	0	0	0	0	0	0	0	0	0	0	0	0	0	0	0	0	0	0	0	0	0	0	n	Proteobacteria	0.85	Alphaproteobacteria	0.64			Rhizobiales	0.61			Rhodobiaceae	0.53	Methyloceanibacter	0.31
Otu1209	0	0	0	0	0	0	0	0	0	0	0	0	0	0	0	0	0	0	0	0	0	0	0	0	0	0	0	0	0	0	n	Proteobacteria	0.77	Betaproteobacteria	0.75			Rhodocyclales	0.59			Rhodocyclaceae	0.59	Sterolibacterium	0.4
Otu121	0	0	1	2	0	2	7	0	0	0	5	0	0	7	0	0	0	3.66139e-05	5.29942e-05	0	8.52842e-05	0.000183236	0	0	0	7.34204e-05	0	0	0.000121866	0	n	Firmicutes	1	Bacilli	1			Bacillales	1			Paenibacillaceae 1	1	Cohnella	1
Otu1210	0	0	0	0	0	0	0	0	0	0	0	0	0	0	0	0	0	0	0	0	0	0	0	0	0	0	0	0	0	0	n	Acidobacteria	0.75	Acidobacteria_Gp3	0.65									Bryobacter	0.48
Otu1211	0	0	0	0	0	0	0	0	0	0	0	0	0	0	0	0	0	0	0	0	0	0	0	0	0	0	0	0	0	0	n	Proteobacteria	0.99	Alphaproteobacteria	0.8			Rhizobiales	0.8			Bradyrhizobiaceae	0.64	Tardiphaga	0.61
Otu1212	0	0	0	0	0	0	0	0	0	0	0	0	0	0	0	0	0	0	0	0	0	0	0	0	0	0	0	0	0	0	n	Proteobacteria	0.93	Deltaproteobacteria	0.86			Myxococcales	0.83	Nannocystineae	0.44	Nannocystaceae	0.44	Pseudenhygromyxa	0.28
Otu1213	0	0	0	0	0	0	0	0	0	0	0	0	0	0	0	0	0	0	0	0	0	0	0	0	0	0	0	0	0	0	n	Proteobacteria	0.56	Deltaproteobacteria	0.46			Syntrophobacterales	0.31			Syntrophobacteraceae	0.29	Desulfovirga	0.28
Otu1214	0	0	0	0	0	0	0	0	0	0	0	0	0	0	0	0	0	0	0	0	0	0	0	0	0	0	0	0	0	0	n	Firmicutes	0.66	Bacilli	0.21			Lactobacillales	0.09			Carnobacteriaceae	0.07	Jeotgalibaca	0.05
Otu1215	0	0	0	0	0	0	0	0	0	0	0	0	0	0	0	0	0	0	0	0	0	0	0	0	0	0	0	0	0	0	n	Proteobacteria	0.99	Alphaproteobacteria	0.93			Rhizobiales	0.92			Bradyrhizobiaceae	0.89	Tardiphaga	0.89
Otu1216	1	0	0	2	0	9	6	5	2	0	0	0	0	0	0	2.84722e-05	0	0	5.29942e-05	0	0.000383779	0.00015706	0.000128426	4.98058e-05	0	0	0	0	0	0	n	Proteobacteria	0.99	Alphaproteobacteria	0.99			Caulobacterales	0.99			Caulobacteraceae	0.99	Phenylobacterium	0.94
Otu1217	0	0	0	0	0	0	0	0	0	0	0	0	0	0	0	0	0	0	0	0	0	0	0	0	0	0	0	0	0	0	n	Proteobacteria	1	Alphaproteobacteria	0.65			Rhizobiales	0.65			Xanthobacteraceae	0.39	Pseudolabrys	0.39
Otu1218	0	0	0	0	0	0	0	0	0	0	0	0	0	0	0	0	0	0	0	0	0	0	0	0	0	0	0	0	0	0	n	Proteobacteria	0.66	Alphaproteobacteria	0.63			Rhizobiales	0.63			Methylobacteriaceae	0.15	Psychroglaciecola	0.15
Otu1219	0	0	0	0	0	0	0	0	0	0	0	0	0	0	0	0	0	0	0	0	0	0	0	0	0	0	0	0	0	0	n	Proteobacteria	0.86	Alphaproteobacteria	0.85			Rhizobiales	0.69			Beijerinckiaceae	0.2	Methylovirgula	0.16
Otu122	1	0	0	9	4	10	0	3	0	0	14	33	5	47	2	2.84722e-05	0	0	0.000238474	0.000147124	0.000426421	0	7.70555e-05	0	0	0.000205577	0.000781991	9.43645e-05	0.000818245	3.53951e-05	n	Proteobacteria	1	Alphaproteobacteria	1			Rhizobiales	1			Phyllobacteriaceae	1	Mesorhizobium	1
Otu1220	0	0	0	0	0	0	0	0	0	0	0	0	0	0	0	0	0	0	0	0	0	0	0	0	0	0	0	0	0	0	n	Firmicutes	0.81	Clostridia	0.8			Clostridiales	0.8			Clostridiaceae 1	0.78	Proteiniclasticum	0.31
Otu1221	0	0	0	0	0	0	0	0	0	0	0	0	0	0	0	0	0	0	0	0	0	0	0	0	0	0	0	0	0	0	n	Proteobacteria	0.84	Alphaproteobacteria	0.63			Rhizobiales	0.63			Xanthobacteraceae	0.34	Pseudolabrys	0.34
Otu1222	0	0	0	0	0	0	0	0	0	0	0	0	0	0	0	0	0	0	0	0	0	0	0	0	0	0	0	0	0	0	n	Actinobacteria	0.5	Actinobacteria	0.5	Actinobacteridae	0.49	Actinomycetales	0.48	Propionibacterineae	0.24	Nocardioidaceae	0.11	Thermasporomyces	0.11
Otu1223	0	0	0	0	0	0	0	0	0	0	0	0	0	0	0	0	0	0	0	0	0	0	0	0	0	0	0	0	0	0	n	Actinobacteria	0.63	Actinobacteria	0.63	Actinobacteridae	0.63	Actinomycetales	0.63	Micrococcineae	0.31	Micrococcaceae	0.13	Renibacterium	0.1
Otu1224	0	0	0	0	0	0	0	0	0	0	0	0	0	0	0	0	0	0	0	0	0	0	0	0	0	0	0	0	0	0	n	Proteobacteria	0.83	Deltaproteobacteria	0.81			Desulfarculales	0.32			Desulfarculaceae	0.32	Desulfocarbo	0.29
Otu1225	0	0	0	0	0	0	0	0	0	0	0	0	0	0	0	0	0	0	0	0	0	0	0	0	0	0	0	0	0	0	n	Actinobacteria	0.99	Actinobacteria	0.97	Rubrobacteridae	0.96	Gaiellales	0.93			Gaiellaceae	0.93	Gaiella	0.93
Otu1226	0	0	0	0	0	0	0	0	0	0	0	0	0	0	0	0	0	0	0	0	0	0	0	0	0	0	0	0	0	0	n	Proteobacteria	0.95	Alphaproteobacteria	0.81			Rhizobiales	0.81			Xanthobacteraceae	0.28	Pseudolabrys	0.28
Otu1227	0	0	0	0	0	0	0	0	0	0	0	0	0	0	0	0	0	0	0	0	0	0	0	0	0	0	0	0	0	0	n	Proteobacteria	0.86	Alphaproteobacteria	0.75			Caulobacterales	0.58			Caulobacteraceae	0.44	Caulobacter	0.25
Otu1228	0	0	0	0	0	0	0	0	0	0	0	0	0	0	0	0	0	0	0	0	0	0	0	0	0	0	0	0	0	0	n	Acidobacteria	0.71	Acidobacteria_Gp1	0.71									Edaphobacter	0.4
Otu1229	0	0	0	0	0	0	0	0	0	0	0	0	0	0	0	0	0	0	0	0	0	0	0	0	0	0	0	0	0	0	n	Proteobacteria	0.99	Gammaproteobacteria	0.98			Xanthomonadales	0.98			Xanthomonadaceae	0.98	Fulvimonas	0.56
Otu123	0	0	0	0	0	0	0	0	0	0	0	0	0	0	0	0	0	0	0	0	0	0	0	0	0	0	0	0	0	0	n	Proteobacteria	1	Alphaproteobacteria	1			Rhodospirillales	1					Reyranella	1
Otu1230	0	0	0	0	0	0	0	0	0	0	0	0	0	0	0	0	0	0	0	0	0	0	0	0	0	0	0	0	0	0	n	Proteobacteria	0.73	Deltaproteobacteria	0.55			Desulfuromonadales	0.28			Geobacteraceae	0.28	Geothermobacter	0.22
Otu1231	0	0	0	0	0	0	0	0	0	0	0	0	0	0	0	0	0	0	0	0	0	0	0	0	0	0	0	0	0	0	n	Bacteroidetes	0.58	Sphingobacteriia	0.35			"Sphingobacteriales"	0.35			Sphingobacteriaceae	0.27	Nubsella	0.12
Otu1232	0	0	0	0	0	0	0	0	0	0	0	0	0	0	0	0	0	0	0	0	0	0	0	0	0	0	0	0	0	0	n	Verrucomicrobia	1	Subdivision3	1									Subdivision3_genera_incertae_sedis	1
Otu1233	0	0	0	0	0	0	0	0	0	0	0	0	0	0	0	0	0	0	0	0	0	0	0	0	0	0	0	0	0	0	n	Elusimicrobia	0.98	Elusimicrobia	0.97			Elusimicrobiales	0.97			Elusimicrobiaceae	0.97	Elusimicrobium	0.97
Otu1234	0	0	0	0	0	0	0	0	0	0	0	0	0	0	0	0	0	0	0	0	0	0	0	0	0	0	0	0	0	0	n	Actinobacteria	0.91	Actinobacteria	0.91	Actinobacteridae	0.85	Actinomycetales	0.85	Corynebacterineae	0.77	Nocardiaceae	0.48	Millisia	0.47
Otu1235	0	0	0	0	0	0	0	0	0	0	0	0	0	0	0	0	0	0	0	0	0	0	0	0	0	0	0	0	0	0	n	Proteobacteria	0.97	Alphaproteobacteria	0.84			Sphingomonadales	0.83			Sphingomonadaceae	0.83	Rhizorhabdus	0.83
Otu1236	0	0	0	0	0	0	0	0	0	0	0	0	0	0	0	0	0	0	0	0	0	0	0	0	0	0	0	0	0	0	n	Proteobacteria	1	Alphaproteobacteria	1			Rhizobiales	0.9			Rhizobiales_incertae_sedis	0.7	Phreatobacter	0.7
Otu1237	0	0	0	0	0	0	0	0	0	0	0	0	0	0	0	0	0	0	0	0	0	0	0	0	0	0	0	0	0	0	n	Firmicutes	1	Bacilli	0.82			Bacillales	0.82			Alicyclobacillaceae	0.62	Alicyclobacillus	0.61
Otu1238	0	0	0	0	0	0	0	0	0	0	0	0	0	0	0	0	0	0	0	0	0	0	0	0	0	0	0	0	0	0	n	Proteobacteria	0.98	Alphaproteobacteria	0.98			Sphingomonadales	0.51			Sphingomonadaceae	0.43	Parablastomonas	0.21
Otu1239	0	0	0	0	0	0	0	0	0	0	0	0	0	0	0	0	0	0	0	0	0	0	0	0	0	0	0	0	0	0	n	Proteobacteria	1	Betaproteobacteria	1			Rhodocyclales	0.26			Rhodocyclaceae	0.26	Azovibrio	0.06
Otu124	0	0	0	0	0	0	0	0	0	0	0	0	0	0	0	0	0	0	0	0	0	0	0	0	0	0	0	0	0	0	n	Acidobacteria	1	Acidobacteria_Gp2	1									Gp2	1
Otu1240	0	0	0	0	0	0	0	0	0	0	0	0	0	0	0	0	0	0	0	0	0	0	0	0	0	0	0	0	0	0	n	Proteobacteria	0.89	Betaproteobacteria	0.56			Burkholderiales	0.45			Burkholderiaceae	0.26	Paucimonas	0.24
Otu1241	0	0	0	0	0	0	0	0	0	0	0	0	0	0	0	0	0	0	0	0	0	0	0	0	0	0	0	0	0	0	n	Proteobacteria	0.97	Gammaproteobacteria	0.66			Xanthomonadales	0.51			Xanthomonadaceae	0.45	Vulcaniibacterium	0.21
Otu1242	0	0	0	0	0	0	0	0	0	1	0	0	0	0	0	0	0	0	0	0	0	0	0	0	2.0014e-05	0	0	0	0	0	n	Firmicutes	1	Bacilli	1			Bacillales	1			Planococcaceae	0.66	Planococcus	0.35
Otu1243	0	0	0	0	0	0	0	0	0	0	0	0	0	0	0	0	0	0	0	0	0	0	0	0	0	0	0	0	0	0	n	Acidobacteria	1	Acidobacteria_Gp1	1									Terriglobus	0.47
Otu1244	0	0	0	0	0	0	0	0	0	0	0	0	0	0	0	0	0	0	0	0	0	0	0	0	0	0	0	0	0	0	n	Armatimonadetes	1	Armatimonadia	1			Armatimonadales	1			Armatimonadaceae	1	Armatimonas/Armatimonadetes_gp1	1
Otu1245	0	0	0	0	0	0	0	0	0	0	0	0	0	0	0	0	0	0	0	0	0	0	0	0	0	0	0	0	0	0	n	Acidobacteria	1	Acidobacteria_Gp3	1									Candidatus Solibacter	0.99
Otu1246	0	0	0	0	0	0	0	0	0	0	0	0	0	0	0	0	0	0	0	0	0	0	0	0	0	0	0	0	0	0	n	Ignavibacteriae	0.09	Ignavibacteria	0.09			Ignavibacteriales	0.09			Ignavibacteriaceae	0.09	Ignavibacterium	0.08
Otu1247	0	0	0	0	0	0	0	0	0	0	0	0	0	0	0	0	0	0	0	0	0	0	0	0	0	0	0	0	0	0	n	Proteobacteria	0.46	Gammaproteobacteria	0.14			Chromatiales	0.04			Ectothiorhodospiraceae	0.04	Ectothiorhodosinus	0.03
Otu1248	0	0	0	0	0	0	0	0	0	0	0	0	0	0	0	0	0	0	0	0	0	0	0	0	0	0	0	0	0	0	n	Proteobacteria	0.97	Alphaproteobacteria	0.89			Rhizobiales	0.35			Bradyrhizobiaceae	0.18	Tardiphaga	0.13
Otu1249	0	0	0	0	0	0	0	0	0	0	0	0	0	0	0	0	0	0	0	0	0	0	0	0	0	0	0	0	0	0	n	Proteobacteria	1	Alphaproteobacteria	1			Rhodospirillales	0.8			Rhodospirillaceae	0.4	Constrictibacter	0.23
Otu125	0	0	0	0	0	0	0	0	0	0	0	0	0	0	0	0	0	0	0	0	0	0	0	0	0	0	0	0	0	0	n	Proteobacteria	1	Betaproteobacteria	1			Neisseriales	0.32			Neisseriaceae	0.32	Pseudogulbenkiania	0.21
Otu1250	0	0	0	0	0	0	0	0	0	2	0	0	0	0	0	0	0	0	0	0	0	0	0	0	4.0028e-05	0	0	0	0	0	n	Bacteroidetes	1	Flavobacteriia	1			"Flavobacteriales"	1			Flavobacteriaceae	1	Cloacibacterium	0.99
Otu1251	0	0	0	0	0	0	0	0	0	0	0	0	0	0	0	0	0	0	0	0	0	0	0	0	0	0	0	0	0	0	n	Bacteroidetes	1	Sphingobacteriia	1			"Sphingobacteriales"	1			Chitinophagaceae	1	Flavihumibacter	0.91
Otu1252	0	0	0	0	0	0	0	0	0	0	0	0	0	0	0	0	0	0	0	0	0	0	0	0	0	0	0	0	0	0	n	Proteobacteria	1	Alphaproteobacteria	1			Rhizobiales	0.87			Rhizobiaceae	0.83	Kaistia	0.83
Otu1253	0	0	0	0	0	0	0	0	0	0	0	0	0	0	0	0	0	0	0	0	0	0	0	0	0	0	0	0	0	0	n	Firmicutes	1	Bacilli	0.93			Bacillales	0.93			Paenibacillaceae 1	0.91	Fontibacillus	0.35
Otu1254	0	0	0	0	0	0	0	0	0	0	0	0	0	0	0	0	0	0	0	0	0	0	0	0	0	0	0	0	0	0	n	Proteobacteria	1	Gammaproteobacteria	0.81			Pseudomonadales	0.8			Pseudomonadaceae	0.8	Rhizobacter	0.8
Otu1255	0	0	0	0	0	0	0	0	0	0	0	0	0	0	0	0	0	0	0	0	0	0	0	0	0	0	0	0	0	0	n	Proteobacteria	1	Alphaproteobacteria	0.75			Sphingomonadales	0.58			Sphingomonadaceae	0.58	Blastomonas	0.46
Otu1256	0	0	0	0	0	0	0	0	0	0	0	0	0	0	0	0	0	0	0	0	0	0	0	0	0	0	0	0	0	0	n	Proteobacteria	1	Alphaproteobacteria	0.97			Sphingomonadales	0.91			Sphingomonadaceae	0.52	Parablastomonas	0.41
Otu1257	0	0	0	0	0	0	0	0	0	0	0	0	0	0	0	0	0	0	0	0	0	0	0	0	0	0	0	0	0	0	n	Proteobacteria	1	Gammaproteobacteria	0.43			Oceanospirillales	0.15			Oceanospirillales_incertae_sedis	0.15	Pseudohongiella	0.15
Otu1258	0	0	0	0	0	0	0	0	0	0	0	0	0	0	0	0	0	0	0	0	0	0	0	0	0	0	0	0	0	0	n	Firmicutes	0.5	Clostridia	0.5			Clostridiales	0.5			Clostridiaceae 1	0.38	Proteiniclasticum	0.31
Otu1259	0	0	0	0	0	0	0	0	0	0	0	0	0	0	0	0	0	0	0	0	0	0	0	0	0	0	0	0	0	0	n	Actinobacteria	0.47	Actinobacteria	0.46	Nitriliruptoridae	0.13	Euzebyales	0.12			Euzebyaceae	0.12	Euzebya	0.12
Otu126	0	0	0	0	0	0	0	0	0	0	0	2	0	0	2	0	0	0	0	0	0	0	0	0	0	0	4.73934e-05	0	0	3.53951e-05	n	Proteobacteria	1	Betaproteobacteria	1			Burkholderiales	0.78			Oxalobacteraceae	0.69	Oxalicibacterium	0.39
Otu1260	0	0	0	0	0	0	0	0	0	0	0	0	0	0	0	0	0	0	0	0	0	0	0	0	0	0	0	0	0	0	n	Proteobacteria	1	Betaproteobacteria	0.65			Burkholderiales	0.48			Oxalobacteraceae	0.39	Rugamonas	0.16
Otu1261	0	0	0	0	0	0	0	0	0	0	0	0	0	0	0	0	0	0	0	0	0	0	0	0	0	0	0	0	0	0	n	Proteobacteria	1	Betaproteobacteria	0.91			Burkholderiales	0.76			Burkholderiaceae	0.6	Burkholderia	0.37
Otu1262	0	0	0	0	0	0	0	0	0	0	0	0	0	0	0	0	0	0	0	0	0	0	0	0	0	0	0	0	0	0	n	Actinobacteria	0.32	Actinobacteria	0.32	Actinobacteridae	0.25	Actinomycetales	0.25	Frankineae	0.17	Cryptosporangiaceae	0.17	Jatrophihabitans	0.17
Otu1263	0	0	0	0	0	0	0	0	0	0	0	0	0	0	0	0	0	0	0	0	0	0	0	0	0	0	0	0	0	0	n	Proteobacteria	1	Betaproteobacteria	1			Hydrogenophilales	0.21			Hydrogenophilaceae	0.21	Thiobacillus	0.21
Otu1264	0	0	0	0	0	0	0	0	0	0	0	0	0	0	0	0	0	0	0	0	0	0	0	0	0	0	0	0	0	0	n	Actinobacteria	0.89	Actinobacteria	0.89	Rubrobacteridae	0.86	Gaiellales	0.86			Gaiellaceae	0.86	Gaiella	0.86
Otu1265	0	0	0	0	0	0	0	0	0	0	0	0	0	0	0	0	0	0	0	0	0	0	0	0	0	0	0	0	0	0	n	Proteobacteria	0.63	Betaproteobacteria	0.41			Burkholderiales	0.23			Oxalobacteraceae	0.04	Pseudoduganella	0.04
Otu1266	0	0	0	0	0	0	0	0	0	0	0	0	0	0	0	0	0	0	0	0	0	0	0	0	0	0	0	0	0	0	n	Proteobacteria	0.81	Alphaproteobacteria	0.8			Rhizobiales	0.79			Bradyrhizobiaceae	0.7	Tardiphaga	0.69
Otu1267	0	0	0	0	0	0	0	0	0	0	0	0	0	0	0	0	0	0	0	0	0	0	0	0	0	0	0	0	0	0	n	Proteobacteria	1	Alphaproteobacteria	1			Rhizobiales	0.69			Rhizobiaceae	0.55	Neorhizobium	0.55
Otu1268	0	0	0	0	0	0	0	0	0	0	0	0	0	0	0	0	0	0	0	0	0	0	0	0	0	0	0	0	0	0	n	Proteobacteria	1	Gammaproteobacteria	1			Xanthomonadales	0.99			Sinobacteraceae	0.99	Steroidobacter	0.8
Otu1269	0	0	0	0	0	0	0	0	0	0	0	0	0	0	0	0	0	0	0	0	0	0	0	0	0	0	0	0	0	0	n	Proteobacteria	0.91	Deltaproteobacteria	0.75			Myxococcales	0.44	Sorangiineae	0.25	Phaselicystidaceae	0.07	Phaselicystis	0.07
Otu127	2	15	0	93	10	0	0	0	0	0	0	0	0	0	0	5.69444e-05	0.000634491	0	0.00246423	0.000367809	0	0	0	0	0	0	0	0	0	0	n	Proteobacteria	0.82	Alphaproteobacteria	0.74			Rickettsiales	0.55			Anaplasmataceae	0.49	Anaplasma	0.27
Otu1270	0	0	0	0	0	0	0	0	0	0	0	0	0	0	0	0	0	0	0	0	0	0	0	0	0	0	0	0	0	0	n	Acidobacteria	0.58	Acidobacteria_Gp25	0.33									Gp25	0.33
Otu1271	0	0	0	0	0	0	0	0	0	0	0	0	0	0	0	0	0	0	0	0	0	0	0	0	0	0	0	0	0	0	n	Proteobacteria	1	Deltaproteobacteria	1			Myxococcales	1	Cystobacterineae	1	Cystobacteraceae	0.57	Cystobacter	0.44
Otu1272	0	0	0	0	0	0	0	0	0	0	0	0	0	0	0	0	0	0	0	0	0	0	0	0	0	0	0	0	0	0	n	Actinobacteria	1	Actinobacteria	1	Actinobacteridae	1	Actinomycetales	1	Pseudonocardineae	1	Pseudonocardiaceae	1	Pseudonocardia	1
Otu1273	0	0	0	0	0	0	0	0	0	0	0	0	0	0	0	0	0	0	0	0	0	0	0	0	0	0	0	0	0	0	n	Proteobacteria	0.72	Alphaproteobacteria	0.61			Rhizobiales	0.56			Phyllobacteriaceae	0.42	Pseudaminobacter	0.36
Otu1274	0	0	0	0	0	0	0	0	0	0	0	0	0	0	0	0	0	0	0	0	0	0	0	0	0	0	0	0	0	0	n	Proteobacteria	1	Betaproteobacteria	1			Burkholderiales	1			Oxalobacteraceae	1	Duganella	0.82
Otu1275	0	0	0	0	0	0	0	0	0	0	0	0	0	0	0	0	0	0	0	0	0	0	0	0	0	0	0	0	0	0	n	Acidobacteria	0.52	Acidobacteria_Gp2	0.52									Gp2	0.52
Otu1276	0	0	0	0	0	0	0	0	0	0	0	0	0	0	0	0	0	0	0	0	0	0	0	0	0	0	0	0	0	0	n	Proteobacteria	0.96	Deltaproteobacteria	0.86			Myxococcales	0.78	Cystobacterineae	0.78	Cystobacteraceae	0.56	Melittangium	0.18
Otu1277	0	0	0	0	0	0	0	0	0	0	0	0	0	0	0	0	0	0	0	0	0	0	0	0	0	0	0	0	0	0	n	Proteobacteria	0.71	Alphaproteobacteria	0.66			Rhodospirillales	0.66			Acetobacteraceae	0.65	Rubritepida	0.31
Otu1278	0	0	0	0	0	0	0	0	0	0	0	0	0	0	0	0	0	0	0	0	0	0	0	0	0	0	0	0	0	0	n	Acidobacteria	0.78	Acidobacteria_Gp3	0.78									Candidatus Solibacter	0.78
Otu1279	0	0	0	0	0	0	0	0	0	0	0	0	0	0	0	0	0	0	0	0	0	0	0	0	0	0	0	0	0	0	n	Actinobacteria	1	Actinobacteria	1	Actinobacteridae	1	Actinomycetales	1	Frankineae	0.86	Cryptosporangiaceae	0.62	Jatrophihabitans	0.61
Otu128	0	0	0	0	0	0	0	0	0	0	0	0	0	0	0	0	0	0	0	0	0	0	0	0	0	0	0	0	0	0	n	Proteobacteria	1	Alphaproteobacteria	1			Rhizobiales	1			Xanthobacteraceae	0.99	Pseudolabrys	0.99
Otu1280	0	0	0	0	0	0	0	0	0	0	0	0	0	0	0	0	0	0	0	0	0	0	0	0	0	0	0	0	0	0	n	Proteobacteria	0.94	Alphaproteobacteria	0.85			Rhizobiales	0.85			Bradyrhizobiaceae	0.84	Tardiphaga	0.8
Otu1281	0	0	0	0	0	2	0	1	0	0	0	0	0	0	0	0	0	0	0	0	8.52842e-05	0	2.56852e-05	0	0	0	0	0	0	0	n	Bacteroidetes	1	Sphingobacteriia	1			"Sphingobacteriales"	1			Sphingobacteriaceae	1	Mucilaginibacter	1
Otu1282	0	0	0	0	0	0	0	0	0	0	0	0	0	0	0	0	0	0	0	0	0	0	0	0	0	0	0	0	0	0	n	Firmicutes	0.91	Bacilli	0.65			Bacillales	0.6			Paenibacillaceae 1	0.37	Ammoniibacillus	0.14
Otu1283	0	0	0	0	0	0	0	0	0	0	0	0	0	0	0	0	0	0	0	0	0	0	0	0	0	0	0	0	0	0	n	Actinobacteria	0.46	Actinobacteria	0.46	Rubrobacteridae	0.46	Solirubrobacterales	0.46			Patulibacteraceae	0.46	Patulibacter	0.46
Otu1284	0	0	0	0	0	0	0	0	0	0	0	0	0	0	0	0	0	0	0	0	0	0	0	0	0	0	0	0	0	0	n	Bacteroidetes	0.62	Flavobacteriia	0.62			"Flavobacteriales"	0.62			Flavobacteriaceae	0.61	Frondibacter	0.14
Otu1285	0	0	0	0	0	0	0	0	0	0	0	0	0	0	0	0	0	0	0	0	0	0	0	0	0	0	0	0	0	0	n	Proteobacteria	0.95	Alphaproteobacteria	0.84			Rhizobiales	0.84			Xanthobacteraceae	0.59	Pseudolabrys	0.59
Otu1286	0	0	0	0	0	0	0	0	0	0	0	0	0	0	0	0	0	0	0	0	0	0	0	0	0	0	0	0	0	0	n	Proteobacteria	1	Betaproteobacteria	0.99			Burkholderiales	0.8			Burkholderiales_incertae_sedis	0.61	Ideonella	0.47
Otu1287	0	0	0	0	0	0	0	0	0	0	0	0	0	0	0	0	0	0	0	0	0	0	0	0	0	0	0	0	0	0	n	Proteobacteria	1	Betaproteobacteria	0.54			Burkholderiales	0.21			Burkholderiaceae	0.16	Paucimonas	0.16
Otu1288	0	0	0	0	0	0	0	0	0	0	0	0	0	0	0	0	0	0	0	0	0	0	0	0	0	0	0	0	0	0	n	Proteobacteria	0.66	Deltaproteobacteria	0.32			Myxococcales	0.2	Cystobacterineae	0.16	Cystobacteraceae	0.1	Melittangium	0.07
Otu1289	0	0	0	0	0	0	0	0	0	0	0	0	0	0	0	0	0	0	0	0	0	0	0	0	0	0	0	0	0	0	n	Proteobacteria	0.65	Alphaproteobacteria	0.65			Rhizobiales	0.65			Xanthobacteraceae	0.25	Pseudolabrys	0.25
Otu129	0	0	0	0	0	0	0	0	0	0	0	0	0	0	0	0	0	0	0	0	0	0	0	0	0	0	0	0	0	0	n	Actinobacteria	0.57	Actinobacteria	0.47	Actinobacteridae	0.35	Actinomycetales	0.35	Propionibacterineae	0.1	Nocardioidaceae	0.09	Thermasporomyces	0.08
Otu1290	0	0	0	0	0	0	0	0	0	0	0	0	0	0	0	0	0	0	0	0	0	0	0	0	0	0	0	0	0	0	n	Firmicutes	0.35	Bacilli	0.21			Bacillales	0.21			Bacillaceae 2	0.16	Aquisalibacillus	0.07
Otu1291	0	0	0	0	0	0	0	0	0	0	0	0	0	0	0	0	0	0	0	0	0	0	0	0	0	0	0	0	0	0	n	Acidobacteria	0.78	Acidobacteria_Gp3	0.78									Candidatus Solibacter	0.77
Otu1292	0	0	0	0	0	0	0	0	0	0	0	0	0	0	0	0	0	0	0	0	0	0	0	0	0	0	0	0	0	0	n	Proteobacteria	0.9	Deltaproteobacteria	0.89			Myxococcales	0.89	Sorangiineae	0.84	Phaselicystidaceae	0.82	Phaselicystis	0.82
Otu1293	0	0	0	0	0	0	0	0	0	0	0	0	0	0	0	0	0	0	0	0	0	0	0	0	0	0	0	0	0	0	n	Proteobacteria	0.82	Betaproteobacteria	0.35			Neisseriales	0.3			Neisseriaceae	0.3	Rivicola	0.27
Otu1294	0	0	0	0	0	0	0	0	0	0	0	0	0	0	0	0	0	0	0	0	0	0	0	0	0	0	0	0	0	0	n	Proteobacteria	0.95	Betaproteobacteria	0.93			Burkholderiales	0.9			Burkholderiales_incertae_sedis	0.63	Xylophilus	0.61
Otu1295	0	0	0	0	0	0	0	0	0	0	0	0	0	0	0	0	0	0	0	0	0	0	0	0	0	0	0	0	0	0	n	Actinobacteria	0.38	Actinobacteria	0.38	Acidimicrobidae	0.3	Acidimicrobiales	0.3	"Acidimicrobineae"	0.3	Acidimicrobiaceae	0.28	Ilumatobacter	0.28
Otu1296	0	0	0	0	0	0	0	0	0	0	0	0	0	0	0	0	0	0	0	0	0	0	0	0	0	0	0	0	0	0	n	Actinobacteria	0.48	Actinobacteria	0.47	Rubrobacteridae	0.27	Gaiellales	0.27			Gaiellaceae	0.27	Gaiella	0.27
Otu1297	0	0	0	0	0	0	0	0	0	0	0	0	0	0	0	0	0	0	0	0	0	0	0	0	0	0	0	0	0	0	n	Proteobacteria	1	Alphaproteobacteria	0.98			Sphingomonadales	0.59			Sphingomonadaceae	0.59	Hephaestia	0.21
Otu1298	0	0	0	0	0	0	0	0	0	0	0	0	0	0	0	0	0	0	0	0	0	0	0	0	0	0	0	0	0	0	n	Actinobacteria	1	Actinobacteria	1	Rubrobacteridae	1	Solirubrobacterales	0.98			Patulibacteraceae	0.61	Patulibacter	0.61
Otu1299	0	0	0	0	0	0	0	0	0	0	0	0	0	0	0	0	0	0	0	0	0	0	0	0	0	0	0	0	0	0	n	Proteobacteria	1	Alphaproteobacteria	1			Rhizobiales	0.97			"Aurantimonadaceae"	0.88	Aureimonas	0.83
Otu130	0	0	0	0	0	0	0	0	0	0	0	0	0	0	0	0	0	0	0	0	0	0	0	0	0	0	0	0	0	0	n	Acidobacteria	0.99	Acidobacteria_Gp3	0.99									Bryobacter	0.67
Otu1300	0	0	0	0	0	2	0	5	0	0	0	0	0	0	0	0	0	0	0	0	8.52842e-05	0	0.000128426	0	0	0	0	0	0	0	n	Proteobacteria	1	Betaproteobacteria	1			Burkholderiales	0.99			Oxalobacteraceae	0.98	Noviherbaspirillum	0.44
Otu1301	0	0	0	0	0	0	0	0	0	0	0	0	0	0	0	0	0	0	0	0	0	0	0	0	0	0	0	0	0	0	n	Proteobacteria	0.83	Alphaproteobacteria	0.78			Rhizobiales	0.77			Hyphomicrobiaceae	0.69	Cucumibacter	0.59
Otu1302	0	0	0	0	0	0	0	0	0	0	0	0	0	0	0	0	0	0	0	0	0	0	0	0	0	0	0	0	0	0	n	Verrucomicrobia	0.44	Subdivision3	0.38									Subdivision3_genera_incertae_sedis	0.38
Otu1303	0	0	0	0	0	0	0	0	0	0	0	0	0	0	0	0	0	0	0	0	0	0	0	0	0	0	0	0	0	0	n	Proteobacteria	0.88	Betaproteobacteria	0.79			Burkholderiales	0.74			Alcaligenaceae	0.73	Paralcaligenes	0.31
Otu1304	0	0	0	0	0	0	0	0	0	0	0	0	0	0	0	0	0	0	0	0	0	0	0	0	0	0	0	0	0	0	n	Proteobacteria	1	Betaproteobacteria	1			Burkholderiales	1			Oxalobacteraceae	0.98	Duganella	0.49
Otu1305	0	0	0	0	0	0	0	0	0	0	0	0	0	0	0	0	0	0	0	0	0	0	0	0	0	0	0	0	0	0	n	Proteobacteria	1	Alphaproteobacteria	1			Sphingomonadales	0.96			Sphingomonadaceae	0.96	Sphingomonas	0.35
Otu1306	0	0	0	0	0	0	0	0	0	0	0	0	0	0	0	0	0	0	0	0	0	0	0	0	0	0	0	0	0	0	n	Bacteroidetes	1	Cytophagia	1			Cytophagales	1			Cytophagaceae	1	Dyadobacter	1
Otu1307	0	0	0	0	0	0	0	0	0	0	0	0	0	0	0	0	0	0	0	0	0	0	0	0	0	0	0	0	0	0	n	Proteobacteria	0.88	Betaproteobacteria	0.71			Rhodocyclales	0.64			Rhodocyclaceae	0.64	Sulfuritalea	0.22
Otu1308	0	0	0	0	0	0	0	0	0	0	0	0	0	0	0	0	0	0	0	0	0	0	0	0	0	0	0	0	0	0	n	Proteobacteria	1	Alphaproteobacteria	0.97			Caulobacterales	0.91			Caulobacteraceae	0.88	Caulobacter	0.57
Otu1309	0	0	0	0	0	0	0	0	0	0	0	0	0	0	0	0	0	0	0	0	0	0	0	0	0	0	0	0	0	0	n	Proteobacteria	1	Alphaproteobacteria	1			Rhodobacterales	1			Rhodobacteraceae	1	Rubellimicrobium	1
Otu1310	0	0	0	0	0	0	0	0	0	0	0	0	0	0	0	0	0	0	0	0	0	0	0	0	0	0	0	0	0	0	n	Proteobacteria	1	Alphaproteobacteria	0.98			Sphingomonadales	0.68			Sphingomonadaceae	0.68	Rhizorhabdus	0.62
Otu1311	0	0	0	0	0	0	0	0	0	0	0	0	0	0	0	0	0	0	0	0	0	0	0	0	0	0	0	0	0	0	n	Proteobacteria	1	Alphaproteobacteria	0.99			Sneathiellales	0.39			Sneathiellaceae	0.39	Ferrovibrio	0.35
Otu1312	0	0	0	0	0	0	0	0	0	0	0	0	0	0	0	0	0	0	0	0	0	0	0	0	0	0	0	0	0	0	n	Proteobacteria	1	Gammaproteobacteria	0.78			"Enterobacteriales"	0.72			Enterobacteriaceae	0.72	Rahnella	0.18
Otu1313	0	0	0	0	0	0	0	0	0	0	0	0	0	0	0	0	0	0	0	0	0	0	0	0	0	0	0	0	0	0	n	Actinobacteria	0.8	Actinobacteria	0.8	Actinobacteridae	0.8	Actinomycetales	0.8	Corynebacterineae	0.8	Mycobacteriaceae	0.8	Hoyosella	0.78
Otu1314	0	0	0	0	0	0	0	0	0	0	0	0	0	0	0	0	0	0	0	0	0	0	0	0	0	0	0	0	0	0	n	Proteobacteria	0.99	Alphaproteobacteria	0.94			Sneathiellales	0.48			Sneathiellaceae	0.48	Ferrovibrio	0.44
Otu1315	0	0	0	0	0	0	0	0	0	0	0	0	0	0	0	0	0	0	0	0	0	0	0	0	0	0	0	0	0	0	n	Proteobacteria	0.96	Gammaproteobacteria	0.83			Xanthomonadales	0.83			Xanthomonadaceae	0.83	Mizugakiibacter	0.15
Otu1316	0	0	0	0	0	0	0	0	0	0	0	0	0	0	0	0	0	0	0	0	0	0	0	0	0	0	0	0	0	0	n	Actinobacteria	1	Actinobacteria	1	Actinobacteridae	1	Actinomycetales	1	Kineosporiineae	0.91	Kineosporiaceae	0.91	Angustibacter	0.53
Otu1317	0	0	0	0	0	0	0	0	0	0	0	0	0	0	0	0	0	0	0	0	0	0	0	0	0	0	0	0	0	0	n	Chloroflexi	0.33	Thermomicrobia	0.24			Thermomicrobiales	0.24			Thermomicrobiaceae	0.24	Thermorudis	0.2
Otu1318	0	0	0	0	0	0	0	0	0	0	0	0	0	0	0	0	0	0	0	0	0	0	0	0	0	0	0	0	0	0	n	Proteobacteria	1	Betaproteobacteria	1			Rhodocyclales	0.43			Rhodocyclaceae	0.43	Azovibrio	0.08
Otu1319	0	0	0	0	0	0	0	0	0	0	0	0	0	0	0	0	0	0	0	0	0	0	0	0	0	0	0	0	0	0	n	Acidobacteria	0.74	Acidobacteria_Gp3	0.74									Candidatus Solibacter	0.65
Otu132	0	0	0	0	0	0	0	0	0	0	0	0	0	0	0	0	0	0	0	0	0	0	0	0	0	0	0	0	0	0	n	Proteobacteria	1	Deltaproteobacteria	1			Bdellovibrionales	0.99			Bdellovibrionaceae	0.99	Bdellovibrio	0.99
Otu1320	0	0	0	0	0	0	0	0	0	0	0	0	0	0	0	0	0	0	0	0	0	0	0	0	0	0	0	0	0	0	n	Acidobacteria	0.45	Acidobacteria_Gp3	0.37									Candidatus Solibacter	0.35
Otu1321	0	0	0	0	0	0	0	0	0	0	0	0	0	0	0	0	0	0	0	0	0	0	0	0	0	0	0	0	0	0	n	Firmicutes	0.98	Bacilli	0.6			Bacillales	0.58			Paenibacillaceae 1	0.53	Cohnella	0.36
Otu1322	0	0	0	0	0	0	0	0	0	0	0	0	0	0	0	0	0	0	0	0	0	0	0	0	0	0	0	0	0	0	n	Nitrospirae	0.03	Nitrospira	0.03			"Nitrospirales"	0.03			"Nitrospiraceae"	0.03	Nitrospira	0.03
Otu1323	0	0	0	0	0	0	0	0	0	0	0	0	0	0	0	0	0	0	0	0	0	0	0	0	0	0	0	0	0	0	n	Acidobacteria	0.81	Acidobacteria_Gp1	0.81									Candidatus Koribacter	0.62
Otu1324	0	0	0	0	0	0	0	0	0	0	0	0	0	0	0	0	0	0	0	0	0	0	0	0	0	0	0	0	0	0	n	Proteobacteria	0.96	Deltaproteobacteria	0.94			Myxococcales	0.93	Sorangiineae	0.93	Polyangiaceae	0.85	Byssovorax	0.39
Otu1325	0	0	0	0	0	0	0	0	0	0	2	0	0	10	3	0	0	0	0	0	0	0	0	0	0	2.93681e-05	0	0	0.000174095	5.30926e-05	n	Proteobacteria	1	Betaproteobacteria	1			Burkholderiales	0.95			Oxalobacteraceae	0.43	Oxalobacter	0.3
Otu1326	0	0	0	0	0	0	0	0	0	0	0	0	0	0	0	0	0	0	0	0	0	0	0	0	0	0	0	0	0	0	n	Actinobacteria	0.78	Actinobacteria	0.78	Actinobacteridae	0.78	Actinomycetales	0.78	Corynebacterineae	0.42	Mycobacteriaceae	0.33	Hoyosella	0.22
Otu1327	0	0	0	0	0	0	0	0	0	0	0	0	0	0	0	0	0	0	0	0	0	0	0	0	0	0	0	0	0	0	n	Chloroflexi	0.6	Caldilineae	0.45			Caldilineales	0.45			Caldilineaceae	0.45	Litorilinea	0.45
Otu1328	0	0	0	0	0	0	0	0	0	0	0	0	0	0	0	0	0	0	0	0	0	0	0	0	0	0	0	0	0	0	n	Firmicutes	0.14	Clostridia	0.12			Thermoanaerobacterales	0.1			Thermoanaerobacteraceae	0.05	Thermanaeromonas	0.04
Otu1329	0	0	0	0	0	0	0	0	0	0	0	0	0	0	0	0	0	0	0	0	0	0	0	0	0	0	0	0	0	0	n	Acidobacteria	0.35	Acidobacteria_Gp3	0.35									Candidatus Solibacter	0.35
Otu133	0	0	0	0	0	0	0	0	0	0	0	0	0	0	0	0	0	0	0	0	0	0	0	0	0	0	0	0	0	0	n	Proteobacteria	1	Betaproteobacteria	1			Sulfuricellales	0.47			Sulfuricellaceae	0.47	Sulfuriferula	0.31
Otu1330	0	0	0	0	0	0	0	0	0	0	0	0	0	0	0	0	0	0	0	0	0	0	0	0	0	0	0	0	0	0	n	Proteobacteria	1	Alphaproteobacteria	1			Rhizobiales	0.89			Xanthobacteraceae	0.34	Pseudolabrys	0.34
Otu1331	0	0	0	0	0	0	0	0	0	0	0	0	0	0	0	0	0	0	0	0	0	0	0	0	0	0	0	0	0	0	n	Proteobacteria	1	Betaproteobacteria	0.94			Burkholderiales	0.8			Burkholderiales_incertae_sedis	0.63	Aquabacterium	0.47
Otu1332	0	0	0	0	0	0	0	0	0	0	0	0	0	0	0	0	0	0	0	0	0	0	0	0	0	0	0	0	0	0	n	Acidobacteria	0.43	Acidobacteria_Gp10	0.42									Gp10	0.42
Otu1333	0	0	0	0	0	0	0	0	0	0	0	0	0	0	0	0	0	0	0	0	0	0	0	0	0	0	0	0	0	0	n	Proteobacteria	0.79	Alphaproteobacteria	0.76			Rhizobiales	0.33			Rhizobiales_incertae_sedis	0.23	Variibacter	0.23
Otu1334	0	0	0	0	0	0	0	0	0	0	0	0	0	0	0	0	0	0	0	0	0	0	0	0	0	0	0	0	0	0	n	Actinobacteria	0.75	Actinobacteria	0.75	Actinobacteridae	0.75	Actinomycetales	0.75	Streptosporangineae	0.71	Streptosporangiaceae	0.66	Thermocatellispora	0.29
Otu1335	0	0	0	0	0	0	0	0	0	0	0	0	0	0	0	0	0	0	0	0	0	0	0	0	0	0	0	0	0	0	n	Proteobacteria	1	Betaproteobacteria	0.96			Neisseriales	0.61			Neisseriaceae	0.61	Chitiniphilus	0.32
Otu1336	0	0	0	0	0	0	0	0	0	0	0	0	0	0	0	0	0	0	0	0	0	0	0	0	0	0	0	0	0	0	n	Proteobacteria	0.99	Betaproteobacteria	0.74			Neisseriales	0.48			Neisseriaceae	0.48	Rivicola	0.34
Otu1337	0	0	0	0	0	0	0	0	0	0	0	0	0	0	0	0	0	0	0	0	0	0	0	0	0	0	0	0	0	0	n	Proteobacteria	0.91	Gammaproteobacteria	0.53			Xanthomonadales	0.53			Xanthomonadaceae	0.53	Oleiagrimonas	0.09
Otu1338	0	0	0	0	0	0	0	0	0	0	0	0	0	0	0	0	0	0	0	0	0	0	0	0	0	0	0	0	0	0	n	Proteobacteria	0.95	Alphaproteobacteria	0.92			Rhizobiales	0.78			Rhodobiaceae	0.46	Tepidamorphus	0.23
Otu1339	0	0	0	0	0	0	0	0	0	0	0	0	0	0	0	0	0	0	0	0	0	0	0	0	0	0	0	0	0	0	n	Proteobacteria	0.59	Deltaproteobacteria	0.26			Bdellovibrionales	0.16			Bacteriovoracaceae	0.16	Bacteriovorax	0.14
Otu134	0	0	0	0	0	0	0	0	0	0	0	0	0	0	0	0	0	0	0	0	0	0	0	0	0	0	0	0	0	0	n	Acidobacteria	0.9	Acidobacteria_Gp3	0.88									Bryobacter	0.49
Otu1340	0	0	0	0	0	0	0	0	0	0	0	0	0	0	0	0	0	0	0	0	0	0	0	0	0	0	0	0	0	0	n	Proteobacteria	0.8	Alphaproteobacteria	0.73			Rhizobiales	0.68			Phyllobacteriaceae	0.37	Aminobacter	0.35
Otu1341	0	0	0	0	0	0	0	0	0	0	0	0	0	0	0	0	0	0	0	0	0	0	0	0	0	0	0	0	0	0	n	Proteobacteria	0.98	Betaproteobacteria	0.9			Burkholderiales	0.38			Alcaligenaceae	0.24	Basilea	0.23
Otu1342	0	0	0	0	0	0	0	0	0	0	0	0	0	0	0	0	0	0	0	0	0	0	0	0	0	0	0	0	0	0	n	Gemmatimonadetes	0.45	Gemmatimonadetes	0.45			Gemmatimonadales	0.45			Gemmatimonadaceae	0.45	Gemmatimonas	0.45
Otu1343	0	0	0	0	0	0	0	0	0	0	0	0	0	0	0	0	0	0	0	0	0	0	0	0	0	0	0	0	0	0	n	Proteobacteria	1	Deltaproteobacteria	1			Myxococcales	1	Cystobacterineae	0.96	Myxococcaceae	0.56	Aggregicoccus	0.22
Otu1344	0	0	0	0	0	0	0	0	0	0	0	0	0	0	0	0	0	0	0	0	0	0	0	0	0	0	0	0	0	0	n	Acidobacteria	0.94	Acidobacteria_Gp3	0.68									Candidatus Solibacter	0.62
Otu1345	0	0	0	0	0	0	0	0	0	0	0	0	0	0	0	0	0	0	0	0	0	0	0	0	0	0	0	0	0	0	n	Proteobacteria	0.97	Alphaproteobacteria	0.75			Rhizobiales	0.75			Bradyrhizobiaceae	0.58	Tardiphaga	0.58
Otu1346	0	0	0	0	0	0	0	0	0	0	0	0	0	0	0	0	0	0	0	0	0	0	0	0	0	0	0	0	0	0	n	Firmicutes	1	Clostridia	1			Clostridiales	1			Clostridiaceae 1	1	Clostridium sensu stricto	1
Otu1347	0	0	0	0	0	0	0	0	0	0	0	0	0	0	0	0	0	0	0	0	0	0	0	0	0	0	0	0	0	0	n	Bacteroidetes	1	Sphingobacteriia	1			"Sphingobacteriales"	1			Chitinophagaceae	1	Flavisolibacter	0.46
Otu1348	0	0	0	0	0	0	0	0	0	0	0	0	0	0	0	0	0	0	0	0	0	0	0	0	0	0	0	0	0	0	n	Proteobacteria	0.99	Alphaproteobacteria	0.76			Rhizobiales	0.76			Bradyrhizobiaceae	0.71	Tardiphaga	0.6
Otu1349	0	0	0	0	0	0	0	0	0	0	0	0	0	0	0	0	0	0	0	0	0	0	0	0	0	0	0	0	0	0	n	Acidobacteria	0.73	Acidobacteria_Gp3	0.73									Candidatus Solibacter	0.73
Otu135	0	0	0	0	0	0	0	0	0	0	0	0	0	0	0	0	0	0	0	0	0	0	0	0	0	0	0	0	0	0	n	Actinobacteria	1	Actinobacteria	1	Actinobacteridae	1	Actinomycetales	1	Pseudonocardineae	1	Pseudonocardiaceae	1	Actinomycetospora	1
Otu1350	0	0	0	0	0	0	0	0	0	0	0	0	0	0	0	0	0	0	0	0	0	0	0	0	0	0	0	0	0	0	n	Actinobacteria	0.46	Actinobacteria	0.46	Rubrobacteridae	0.4	Solirubrobacterales	0.4			Conexibacteraceae	0.4	Conexibacter	0.4
Otu1351	0	0	0	0	0	0	0	0	0	0	0	0	0	0	0	0	0	0	0	0	0	0	0	0	0	0	0	0	0	0	n	Proteobacteria	0.73	Alphaproteobacteria	0.73			Rhizobiales	0.73			Xanthobacteraceae	0.43	Pseudolabrys	0.43
Otu1352	0	0	0	0	0	0	0	0	0	0	0	0	0	0	0	0	0	0	0	0	0	0	0	0	0	0	0	0	0	0	n	Proteobacteria	0.57	Betaproteobacteria	0.44			Burkholderiales	0.42			Alcaligenaceae	0.09	Eoetvoesia	0.05
Otu1353	0	0	0	0	0	0	0	0	0	0	0	0	0	0	0	0	0	0	0	0	0	0	0	0	0	0	0	0	0	0	n	Proteobacteria	1	Alphaproteobacteria	1			Rhizobiales	1			Rhizobiales_incertae_sedis	0.25	Variibacter	0.25
Otu1354	0	0	0	0	0	0	0	0	0	0	0	0	0	0	0	0	0	0	0	0	0	0	0	0	0	0	0	0	0	0	n	Acidobacteria	0.81	Acidobacteria_Gp3	0.79									Candidatus Solibacter	0.78
Otu1355	0	0	0	0	0	0	0	0	0	0	0	0	0	0	0	0	0	0	0	0	0	0	0	0	0	0	0	0	0	0	n	Proteobacteria	0.67	Betaproteobacteria	0.67			Burkholderiales	0.61			Burkholderiaceae	0.27	Paucimonas	0.27
Otu1356	0	0	0	0	0	0	0	0	0	0	0	0	0	0	0	0	0	0	0	0	0	0	0	0	0	0	0	0	0	0	n	Actinobacteria	0.76	Actinobacteria	0.69	Actinobacteridae	0.3	Actinomycetales	0.3	Pseudonocardineae	0.23	Pseudonocardiaceae	0.23	Haloechinothrix	0.22
Otu1357	0	0	0	0	0	0	0	0	0	0	0	0	0	0	0	0	0	0	0	0	0	0	0	0	0	0	0	0	0	0	n	Proteobacteria	0.86	Betaproteobacteria	0.73			Rhodocyclales	0.63			Rhodocyclaceae	0.63	Sterolibacterium	0.34
Otu1358	0	0	0	0	0	0	0	0	0	0	0	0	0	0	0	0	0	0	0	0	0	0	0	0	0	0	0	0	0	0	n	Proteobacteria	0.99	Alphaproteobacteria	0.99			Rhizobiales	0.74			Bradyrhizobiaceae	0.66	Tardiphaga	0.6
Otu1359	0	0	0	0	0	0	0	0	0	0	0	0	0	0	0	0	0	0	0	0	0	0	0	0	0	0	0	0	0	0	n	Proteobacteria	1	Alphaproteobacteria	1			Rhizobiales	1			Beijerinckiaceae	0.62	Methylovirgula	0.39
Otu136	0	0	0	0	0	0	0	0	0	0	0	0	0	0	0	0	0	0	0	0	0	0	0	0	0	0	0	0	0	0	n	Acidobacteria	1	Acidobacteria_Gp3	1									Bryobacter	0.43
Otu1360	0	0	0	0	0	0	0	0	0	0	0	0	0	0	0	0	0	0	0	0	0	0	0	0	0	0	0	0	0	0	n	Proteobacteria	0.92	Alphaproteobacteria	0.87			Rhodospirillales	0.68			Acetobacteraceae	0.62	Acidisphaera	0.22
Otu1361	0	0	0	0	0	1	0	1	1	0	0	0	0	0	0	0	0	0	0	0	4.26421e-05	0	2.56852e-05	2.49029e-05	0	0	0	0	0	0	n	Proteobacteria	1	Betaproteobacteria	0.97			Burkholderiales	0.88			Oxalobacteraceae	0.75	Duganella	0.6
Otu1362	0	0	0	0	0	0	0	0	0	0	0	0	0	0	0	0	0	0	0	0	0	0	0	0	0	0	0	0	0	0	n	Proteobacteria	1	Alphaproteobacteria	0.99			Rhizobiales	0.97			Rhizobiaceae	0.62	Rhizobium	0.59
Otu1363	0	0	0	0	0	0	0	0	0	0	0	0	0	0	0	0	0	0	0	0	0	0	0	0	0	0	0	0	0	0	n	Proteobacteria	1	Alphaproteobacteria	0.89			Rhizobiales	0.87			Xanthobacteraceae	0.39	Pseudolabrys	0.39
Otu1364	0	0	0	0	0	0	0	0	0	0	0	0	0	0	0	0	0	0	0	0	0	0	0	0	0	0	0	0	0	0	n	Proteobacteria	0.99	Betaproteobacteria	0.88			Rhodocyclales	0.27			Rhodocyclaceae	0.27	Sterolibacterium	0.1
Otu1365	0	0	0	0	0	0	0	0	0	0	0	0	0	0	0	0	0	0	0	0	0	0	0	0	0	0	0	0	0	0	n	Proteobacteria	0.85	Alphaproteobacteria	0.85			Rhizobiales	0.85			Xanthobacteraceae	0.51	Pseudolabrys	0.51
Otu1366	0	0	0	0	0	0	0	0	0	0	0	0	0	0	0	0	0	0	0	0	0	0	0	0	0	0	0	0	0	0	n	Proteobacteria	0.97	Alphaproteobacteria	0.95			Rhizobiales	0.84			Rhizobiaceae	0.58	Shinella	0.4
Otu1367	0	0	0	0	0	0	0	0	0	0	0	0	0	0	0	0	0	0	0	0	0	0	0	0	0	0	0	0	0	0	n	Proteobacteria	0.99	Betaproteobacteria	0.85			Burkholderiales	0.85			Burkholderiales_incertae_sedis	0.74	Xylophilus	0.74
Otu1368	0	0	0	0	0	0	0	0	0	0	0	0	0	0	0	0	0	0	0	0	0	0	0	0	0	0	0	0	0	0	n	Proteobacteria	1	Alphaproteobacteria	1			Rhizobiales	1			Rhodobiaceae	0.53	Afifella	0.51
Otu1369	0	0	0	0	0	8	1	5	0	0	0	0	0	0	0	0	0	0	0	0	0.000341137	2.61766e-05	0.000128426	0	0	0	0	0	0	0	n	Proteobacteria	1	Alphaproteobacteria	1			Rhizobiales	0.99			Phyllobacteriaceae	0.28	Lentilitoribacter	0.09
Otu137	0	0	0	0	0	0	0	0	0	1	0	0	0	0	0	0	0	0	0	0	0	0	0	0	2.0014e-05	0	0	0	0	0	n	Proteobacteria	1	Alphaproteobacteria	1			Alphaproteobacteria_incertae_sedis	0.99					Rhizomicrobium	0.99
Otu1370	0	0	0	0	0	0	0	0	0	0	0	0	0	0	0	0	0	0	0	0	0	0	0	0	0	0	0	0	0	0	n	Bacteroidetes	1	Sphingobacteriia	1			"Sphingobacteriales"	1			Sphingobacteriaceae	1	Pedobacter	1
Otu1371	0	0	0	0	0	0	0	0	0	0	0	0	0	0	0	0	0	0	0	0	0	0	0	0	0	0	0	0	0	0	n	Proteobacteria	0.99	Alphaproteobacteria	0.78			Alphaproteobacteria_incertae_sedis	0.62					Rhizomicrobium	0.62
Otu1372	0	0	0	0	0	0	0	0	0	0	0	0	0	0	0	0	0	0	0	0	0	0	0	0	0	0	0	0	0	0	n	Proteobacteria	1	Alphaproteobacteria	1			Sphingomonadales	0.47			Sphingomonadaceae	0.37	Parablastomonas	0.17
Otu1373	0	0	0	0	0	0	0	0	0	0	0	0	0	0	0	0	0	0	0	0	0	0	0	0	0	0	0	0	0	0	n	Proteobacteria	0.95	Betaproteobacteria	0.74			Burkholderiales	0.33			Comamonadaceae	0.22	Zhizhongheella	0.19
Otu1374	0	0	0	0	0	0	0	0	0	0	0	0	0	0	0	0	0	0	0	0	0	0	0	0	0	0	0	0	0	0	n	Actinobacteria	0.35	Actinobacteria	0.35	Actinobacteridae	0.35	Actinomycetales	0.35	Micrococcineae	0.34	Cellulomonadaceae	0.24	Sediminihabitans	0.24
Otu1375	0	0	0	0	0	0	0	0	0	0	0	0	0	0	0	0	0	0	0	0	0	0	0	0	0	0	0	0	0	0	n	Proteobacteria	0.99	Deltaproteobacteria	0.81			Myxococcales	0.81	Cystobacterineae	0.81	Cystobacteraceae	0.73	Hyalangium	0.62
Otu1376	0	0	0	0	0	0	0	0	0	0	0	0	0	0	0	0	0	0	0	0	0	0	0	0	0	0	0	0	0	0	n	Proteobacteria	0.97	Betaproteobacteria	0.93			Burkholderiales	0.57			Burkholderiaceae	0.44	Paucimonas	0.4
Otu1377	0	0	0	0	0	0	0	0	0	0	0	0	0	0	0	0	0	0	0	0	0	0	0	0	0	0	0	0	0	0	n	Proteobacteria	0.94	Gammaproteobacteria	0.23			Acidithiobacillales	0.17			Thermithiobacillaceae	0.16	Thermithiobacillus	0.16
Otu1378	0	0	0	0	1	0	0	0	1	0	3	0	0	0	37	0	0	0	0	3.67809e-05	0	0	0	2.49029e-05	0	4.40522e-05	0	0	0	0.000654809	n	Proteobacteria	1	Betaproteobacteria	0.6			Neisseriales	0.47			Neisseriaceae	0.47	Silvimonas	0.28
Otu1379	0	0	0	0	0	0	0	0	0	0	0	0	0	0	0	0	0	0	0	0	0	0	0	0	0	0	0	0	0	0	n	Proteobacteria	0.37	Deltaproteobacteria	0.28			Syntrophobacterales	0.17			Syntrophobacteraceae	0.17	Desulfoglaeba	0.13
Otu138	0	0	0	0	0	0	0	0	0	0	0	0	0	0	0	0	0	0	0	0	0	0	0	0	0	0	0	0	0	0	n	Proteobacteria	1	Alphaproteobacteria	1			Rhodospirillales	1			Acetobacteraceae	1	Belnapia	0.55
Otu1380	0	0	0	0	0	0	0	0	0	0	0	0	0	0	0	0	0	0	0	0	0	0	0	0	0	0	0	0	0	0	n	Proteobacteria	1	Alphaproteobacteria	1			Rhodospirillales	0.39			Rhodospirillaceae	0.39	Aestuariispira	0.21
Otu1381	0	0	0	0	0	0	0	0	0	0	0	0	0	0	0	0	0	0	0	0	0	0	0	0	0	0	0	0	0	0	n	Proteobacteria	1	Alphaproteobacteria	1			Rhizobiales	1			Hyphomicrobiaceae	1	Devosia	1
Otu1382	0	0	0	0	0	0	0	0	0	0	3	1	0	1	3	0	0	0	0	0	0	0	0	0	0	4.40522e-05	2.36967e-05	0	1.74095e-05	5.30926e-05	n	Proteobacteria	1	Betaproteobacteria	1			Burkholderiales	0.98			Burkholderiaceae	0.9	Pandoraea	0.59
Otu1383	0	0	0	0	0	0	0	0	0	0	0	0	0	0	0	0	0	0	0	0	0	0	0	0	0	0	0	0	0	0	n	Proteobacteria	1	Betaproteobacteria	1			Sulfuricellales	0.44			Sulfuricellaceae	0.44	Sulfuricella	0.43
Otu1384	0	0	0	0	0	0	0	0	0	0	0	0	0	0	0	0	0	0	0	0	0	0	0	0	0	0	0	0	0	0	n	Proteobacteria	1	Alphaproteobacteria	0.97			Alphaproteobacteria_incertae_sedis	0.5					Geminicoccus	0.5
Otu1385	0	0	0	0	0	1	0	0	0	0	0	0	0	0	0	0	0	0	0	0	4.26421e-05	0	0	0	0	0	0	0	0	0	n	Actinobacteria	1	Actinobacteria	1	Actinobacteridae	1	Actinomycetales	1	Frankineae	1	Nakamurellaceae	1	Nakamurella	1
Otu1386	0	0	0	0	0	0	0	0	0	0	0	0	0	0	0	0	0	0	0	0	0	0	0	0	0	0	0	0	0	0	n	Proteobacteria	0.63	Alphaproteobacteria	0.62			Rhizobiales	0.6			Methylobacteriaceae	0.54	Psychroglaciecola	0.54
Otu1387	0	0	0	0	0	10	7	12	2	1	9	6	31	1	168	0	0	0	0	0	0.000426421	0.000183236	0.000308222	4.98058e-05	2.0014e-05	0.000132157	0.00014218	0.00058506	1.74095e-05	0.00297319	n	Proteobacteria	1	Betaproteobacteria	1			Burkholderiales	0.98			Oxalobacteraceae	0.94	Telluria	0.19
Otu1388	0	0	0	0	0	0	0	0	0	0	0	0	0	0	0	0	0	0	0	0	0	0	0	0	0	0	0	0	0	0	n	Proteobacteria	1	Betaproteobacteria	0.99			Burkholderiales	0.98			Burkholderiaceae	0.69	Paucimonas	0.67
Otu1389	0	0	0	0	0	0	0	0	0	0	0	0	0	0	0	0	0	0	0	0	0	0	0	0	0	0	0	0	0	0	n	Firmicutes	0.33	Clostridia	0.32			Halanaerobiales	0.11					Anoxybacter	0.09
Otu139	0	0	0	0	0	29	3	25	0	0	3	16	24	33	17	0	0	0	0	0	0.00123662	7.85299e-05	0.000642129	0	0	4.40522e-05	0.000379147	0.00045295	0.000574513	0.000300858	n	Firmicutes	1	Bacilli	1			Bacillales	1			Paenibacillaceae 1	1	Paenibacillus	0.98
Otu1390	0	0	0	0	0	0	0	0	0	0	0	0	0	0	0	0	0	0	0	0	0	0	0	0	0	0	0	0	0	0	n	Actinobacteria	0.87	Actinobacteria	0.87	Actinobacteridae	0.87	Actinomycetales	0.87	Propionibacterineae	0.82	Propionibacteriaceae	0.69	Friedmanniella	0.33
Otu1391	0	0	0	0	0	0	0	0	0	0	0	0	0	0	0	0	0	0	0	0	0	0	0	0	0	0	0	0	0	0	n	Acidobacteria	0.79	Acidobacteria_Gp1	0.79									Bryocella	0.76
Otu1392	0	0	0	0	0	0	0	0	0	0	0	0	0	0	0	0	0	0	0	0	0	0	0	0	0	0	0	0	0	0	n	Proteobacteria	1	Alphaproteobacteria	1			Rhizobiales	0.9			Rhizobiales_incertae_sedis	0.29	Alsobacter	0.11
Otu1393	0	0	0	0	0	0	0	0	0	0	0	0	0	0	0	0	0	0	0	0	0	0	0	0	0	0	0	0	0	0	n	Proteobacteria	0.6	Deltaproteobacteria	0.44			Bdellovibrionales	0.04			Bacteriovoracaceae	0.04	Bacteriovorax	0.04
Otu1394	0	0	0	0	0	0	0	0	0	0	0	0	0	0	0	0	0	0	0	0	0	0	0	0	0	0	0	0	0	0	n	Proteobacteria	1	Betaproteobacteria	0.9			Burkholderiales	0.87			Comamonadaceae	0.5	Zhizhongheella	0.44
Otu1395	0	0	0	0	0	0	0	0	0	0	0	0	0	0	0	0	0	0	0	0	0	0	0	0	0	0	0	0	0	0	n	Proteobacteria	1	Betaproteobacteria	0.99			Burkholderiales	0.99			Oxalobacteraceae	0.82	Duganella	0.22
Otu1396	0	0	0	0	0	0	0	0	0	0	0	0	0	0	0	0	0	0	0	0	0	0	0	0	0	0	0	0	0	0	n	Actinobacteria	0.64	Actinobacteria	0.64	Actinobacteridae	0.63	Actinomycetales	0.63	Propionibacterineae	0.6	Propionibacteriaceae	0.6	Auraticoccus	0.37
Otu1397	0	0	0	0	0	0	0	0	0	0	0	0	0	0	0	0	0	0	0	0	0	0	0	0	0	0	0	0	0	0	n	Gemmatimonadetes	0.81	Gemmatimonadetes	0.81			Gemmatimonadales	0.81			Gemmatimonadaceae	0.81	Gemmatimonas	0.81
Otu1398	0	0	0	0	0	0	0	0	0	0	0	0	0	0	0	0	0	0	0	0	0	0	0	0	0	0	0	0	0	0	n	Acidobacteria	0.58	Acidobacteria_Gp3	0.58									Candidatus Solibacter	0.58
Otu1399	0	0	0	0	0	0	0	0	0	0	0	0	0	0	0	0	0	0	0	0	0	0	0	0	0	0	0	0	0	0	n	Proteobacteria	1	Deltaproteobacteria	1			Myxococcales	1	Cystobacterineae	1	Cystobacteraceae	0.34	Melittangium	0.28
Otu140	0	0	0	0	0	0	0	0	0	0	0	0	0	0	0	0	0	0	0	0	0	0	0	0	0	0	0	0	0	0	n	Actinobacteria	1	Actinobacteria	1	Rubrobacteridae	1	Solirubrobacterales	1			Conexibacteraceae	0.71	Conexibacter	0.71
Otu1400	0	0	0	0	0	0	0	0	0	0	0	0	0	0	0	0	0	0	0	0	0	0	0	0	0	0	0	0	0	0	n	Acidobacteria	0.85	Acidobacteria_Gp3	0.85									Candidatus Solibacter	0.85
Otu1401	0	0	0	0	0	0	0	0	0	0	0	0	0	0	0	0	0	0	0	0	0	0	0	0	0	0	0	0	0	0	n	Proteobacteria	0.99	Alphaproteobacteria	0.5			Sphingomonadales	0.27			Erythrobacteraceae	0.27	Croceicoccus	0.27
Otu1402	0	0	0	0	0	0	0	0	0	0	0	0	0	0	0	0	0	0	0	0	0	0	0	0	0	0	0	0	0	0	n	Acidobacteria	0.82	Holophagae	0.37			Holophagales	0.37			Holophagaceae	0.37	Holophaga	0.23
Otu1403	0	0	0	0	0	0	0	0	0	0	0	0	0	0	0	0	0	0	0	0	0	0	0	0	0	0	0	0	0	0	n	Proteobacteria	0.71	Alphaproteobacteria	0.59			Rhizobiales	0.55			Hyphomicrobiaceae	0.23	Aquabacter	0.22
Otu1404	0	0	0	0	0	0	0	0	0	0	0	0	0	0	0	0	0	0	0	0	0	0	0	0	0	0	0	0	0	0	n	Proteobacteria	1	Gammaproteobacteria	1			Aeromonadales	1			Aeromonadaceae	1	Aeromonas	1
Otu1405	0	0	0	0	0	0	0	0	0	0	0	0	0	0	0	0	0	0	0	0	0	0	0	0	0	0	0	0	0	0	n	Proteobacteria	1	Betaproteobacteria	1			Hydrogenophilales	0.69			Hydrogenophilaceae	0.69	Thiobacillus	0.69
Otu1406	0	0	0	0	0	0	0	0	0	0	0	0	0	0	0	0	0	0	0	0	0	0	0	0	0	0	0	0	0	0	n	Actinobacteria	1	Actinobacteria	1	Rubrobacteridae	1	Gaiellales	0.98			Gaiellaceae	0.98	Gaiella	0.98
Otu1407	0	0	0	0	0	0	0	0	0	0	0	0	0	0	0	0	0	0	0	0	0	0	0	0	0	0	0	0	0	0	n	Proteobacteria	0.97	Deltaproteobacteria	0.91			Myxococcales	0.87	Sorangiineae	0.39	Polyangiaceae	0.33	Byssovorax	0.3
Otu1408	0	0	0	0	0	0	0	0	0	0	0	0	0	0	0	0	0	0	0	0	0	0	0	0	0	0	0	0	0	0	n	Proteobacteria	1	Deltaproteobacteria	1			Myxococcales	1	Sorangiineae	1	Labilitrichaceae	0.94	Labilithrix	0.94
Otu1409	0	0	0	0	0	0	0	0	0	0	0	0	0	0	0	0	0	0	0	0	0	0	0	0	0	0	0	0	0	0	n	Planctomycetes	0.44	Planctomycetia	0.38			Planctomycetales	0.38			Planctomycetaceae	0.38	Gimesia	0.22
Otu141	0	0	0	0	0	0	0	0	0	0	0	0	0	0	0	0	0	0	0	0	0	0	0	0	0	0	0	0	0	0	n	Proteobacteria	1	Alphaproteobacteria	1			Rhodospirillales	1			Acetobacteraceae	1	Kozakia	0.06
Otu1410	0	0	0	0	0	0	0	0	0	0	0	0	0	0	0	0	0	0	0	0	0	0	0	0	0	0	0	0	0	0	n	Proteobacteria	0.91	Alphaproteobacteria	0.9			Sphingomonadales	0.7			Sphingomonadaceae	0.7	Parasphingopyxis	0.09
Otu1411	0	0	0	0	0	0	0	0	0	0	0	0	0	0	0	0	0	0	0	0	0	0	0	0	0	0	0	0	0	0	n	Proteobacteria	1	Alphaproteobacteria	0.95			Rhizobiales	0.92			Xanthobacteraceae	0.44	Pseudolabrys	0.44
Otu1412	0	0	0	0	0	0	0	0	0	0	0	0	0	0	0	0	0	0	0	0	0	0	0	0	0	0	0	0	0	0	n	Proteobacteria	1	Alphaproteobacteria	1			Rhodobacterales	0.98			Rhodobacteraceae	0.98	Amaricoccus	0.98
Otu1413	0	0	0	0	0	0	0	0	0	0	0	0	0	0	0	0	0	0	0	0	0	0	0	0	0	0	0	0	0	0	n	Verrucomicrobia	1	Subdivision3	1									Subdivision3_genera_incertae_sedis	0.99
Otu1414	0	0	0	0	0	0	0	0	0	0	0	0	0	0	0	0	0	0	0	0	0	0	0	0	0	0	0	0	0	0	n	Proteobacteria	1	Alphaproteobacteria	1			Rhizobiales	1			Methylobacteriaceae	1	Methylobacterium	1
Otu1415	0	0	0	0	0	0	0	0	0	0	0	0	0	0	0	0	0	0	0	0	0	0	0	0	0	0	0	0	0	0	n	Proteobacteria	1	Betaproteobacteria	0.89			Burkholderiales	0.75			Oxalobacteraceae	0.19	Pseudoduganella	0.16
Otu1416	0	0	0	0	0	0	0	0	0	0	0	0	0	0	0	0	0	0	0	0	0	0	0	0	0	0	0	0	0	0	n	Proteobacteria	1	Alphaproteobacteria	1			Rhizobiales	0.93			Bradyrhizobiaceae	0.93	Tardiphaga	0.81
Otu1417	0	0	0	0	0	0	0	0	0	0	0	0	0	0	0	0	0	0	0	0	0	0	0	0	0	0	0	0	0	0	n	Proteobacteria	0.95	Deltaproteobacteria	0.93			Myxococcales	0.93	Sorangiineae	0.63	Polyangiaceae	0.57	Minicystis	0.33
Otu1418	0	0	0	0	0	0	0	0	0	0	0	0	0	0	0	0	0	0	0	0	0	0	0	0	0	0	0	0	0	0	n	Proteobacteria	1	Alphaproteobacteria	0.98			Rickettsiales	0.96			Rickettsiaceae	0.93	Rickettsia	0.56
Otu1419	0	0	0	0	0	0	0	0	0	0	0	0	0	0	0	0	0	0	0	0	0	0	0	0	0	0	0	0	0	0	n	Proteobacteria	0.65	Betaproteobacteria	0.64			Burkholderiales	0.48			Burkholderiaceae	0.31	Paucimonas	0.04
Otu142	0	0	1	1	1	0	0	0	0	0	0	0	0	0	0	0	0	3.66139e-05	2.64971e-05	3.67809e-05	0	0	0	0	0	0	0	0	0	0	n	Proteobacteria	1	Alphaproteobacteria	1			Rhizobiales	1			Hyphomicrobiaceae	1	Devosia	1
Otu1420	0	0	0	0	0	0	0	0	0	0	0	0	0	0	0	0	0	0	0	0	0	0	0	0	0	0	0	0	0	0	n	Proteobacteria	1	Alphaproteobacteria	1			Rhodospirillales	0.64			Acetobacteraceae	0.64	Paracraurococcus	0.2
Otu1421	0	0	0	0	0	0	0	0	0	0	0	0	0	0	0	0	0	0	0	0	0	0	0	0	0	0	0	0	0	0	n	Proteobacteria	0.84	Deltaproteobacteria	0.78			Bdellovibrionales	0.67			Bdellovibrionaceae	0.67	Bdellovibrio	0.67
Otu1422	0	0	0	0	0	0	0	0	0	0	0	0	0	0	0	0	0	0	0	0	0	0	0	0	0	0	0	0	0	0	n	Actinobacteria	0.87	Actinobacteria	0.87	Actinobacteridae	0.87	Actinomycetales	0.87	Micrococcineae	0.87	Microbacteriaceae	0.87	Homoserinimonas	0.67
Otu1423	0	0	0	0	0	0	0	0	0	0	0	0	0	0	0	0	0	0	0	0	0	0	0	0	0	0	0	0	0	0	n	Proteobacteria	1	Betaproteobacteria	0.99			Burkholderiales	0.96			Oxalobacteraceae	0.93	Janthinobacterium	0.19
Otu1424	0	0	0	0	0	0	0	0	0	0	0	0	0	0	0	0	0	0	0	0	0	0	0	0	0	0	0	0	0	0	n	Proteobacteria	0.8	Alphaproteobacteria	0.38			Rhizobiales	0.07			Methylocystaceae	0.05	Terasakiella	0.05
Otu1425	0	0	0	0	0	0	0	0	0	0	0	0	0	0	0	0	0	0	0	0	0	0	0	0	0	0	0	0	0	0	n	Proteobacteria	1	Betaproteobacteria	0.88			Burkholderiales	0.85			Oxalobacteraceae	0.82	Paraherbaspirillum	0.08
Otu1426	0	0	0	0	0	0	0	0	0	0	0	0	0	0	0	0	0	0	0	0	0	0	0	0	0	0	0	0	0	0	n	Proteobacteria	0.97	Alphaproteobacteria	0.54			Sphingomonadales	0.54			Sphingomonadaceae	0.54	Rhizorhabdus	0.52
Otu1427	0	0	0	0	0	0	0	0	0	0	0	0	0	0	0	0	0	0	0	0	0	0	0	0	0	0	0	0	0	0	n	Acidobacteria	0.47	Acidobacteria_Gp1	0.47									Bryocella	0.43
Otu1428	0	0	0	0	0	2	5	52	8	42	0	0	0	0	0	0	0	0	0	0	8.52842e-05	0.000130883	0.00133563	0.000199223	0.000840588	0	0	0	0	0	n	Proteobacteria	1	Betaproteobacteria	0.91			Burkholderiales	0.84			Alcaligenaceae	0.42	Pigmentiphaga	0.32
Otu1429	0	0	0	0	0	0	0	0	0	0	251	101	110	66	157	0	0	0	0	0	0	0	0	0	0	0.0036857	0.00239336	0.00207602	0.00114903	0.00277852	n	Proteobacteria	1	Alphaproteobacteria	0.7			Rhizobiales	0.65			Phyllobacteriaceae	0.57	Lentilitoribacter	0.56
Otu143	0	0	0	0	0	0	0	0	0	0	0	128	0	0	0	0	0	0	0	0	0	0	0	0	0	0	0.00303318	0	0	0	n	Actinobacteria	1	Actinobacteria	1	Actinobacteridae	1	Actinomycetales	1	Pseudonocardineae	1	Pseudonocardiaceae	1	Pseudonocardia	1
Otu1430	0	0	0	0	0	0	0	0	0	0	0	0	0	0	0	0	0	0	0	0	0	0	0	0	0	0	0	0	0	0	n	Proteobacteria	1	Alphaproteobacteria	1			Sneathiellales	0.28			Sneathiellaceae	0.28	Ferrovibrio	0.24
Otu1431	0	0	0	0	0	0	0	0	0	0	0	0	0	0	0	0	0	0	0	0	0	0	0	0	0	0	0	0	0	0	n	Acidobacteria	0.98	Acidobacteria_Gp3	0.98									Candidatus Solibacter	0.98
Otu1432	0	0	0	0	0	0	0	0	0	0	0	0	0	0	0	0	0	0	0	0	0	0	0	0	0	0	0	0	0	0	n	Planctomycetes	0.41	Planctomycetia	0.41			Candidatus Brocadiales	0.37			Candidatus Brocadiaceae	0.37	Candidatus Brocadia	0.27
Otu1433	0	0	0	0	0	0	0	0	0	0	0	0	0	0	0	0	0	0	0	0	0	0	0	0	0	0	0	0	0	0	n	Proteobacteria	0.95	Alphaproteobacteria	0.92			Rhodospirillales	0.41			Rhodospirillaceae	0.41	Telmatospirillum	0.39
Otu1434	0	3	1	0	0	0	0	0	0	0	0	0	0	0	0	0	0.000126898	3.66139e-05	0	0	0	0	0	0	0	0	0	0	0	0	n	Proteobacteria	1	Gammaproteobacteria	1			"Enterobacteriales"	1			Enterobacteriaceae	1	Erwinia	0.74
Otu1435	0	0	0	0	0	0	0	0	0	0	0	0	0	0	0	0	0	0	0	0	0	0	0	0	0	0	0	0	0	0	n	Proteobacteria	1	Gammaproteobacteria	1			Xanthomonadales	1			Sinobacteraceae	1	Panacagrimonas	0.49
Otu1436	0	0	0	0	0	0	0	0	0	0	0	0	0	0	0	0	0	0	0	0	0	0	0	0	0	0	0	0	0	0	n	Proteobacteria	0.6	Gammaproteobacteria	0.27			Xanthomonadales	0.22			Xanthomonadaceae	0.22	Metallibacterium	0.16
Otu1437	0	0	0	0	0	0	0	0	0	0	0	0	0	0	0	0	0	0	0	0	0	0	0	0	0	0	0	0	0	0	n	Proteobacteria	0.93	Betaproteobacteria	0.46			Rhodocyclales	0.18			Rhodocyclaceae	0.18	Ferribacterium	0.07
Otu1438	0	0	0	0	0	0	0	0	0	0	0	0	0	0	0	0	0	0	0	0	0	0	0	0	0	0	0	0	0	0	n	Acidobacteria	0.55	Acidobacteria_Gp3	0.5									Candidatus Solibacter	0.5
Otu1439	0	0	0	0	0	0	0	0	0	0	0	0	0	0	0	0	0	0	0	0	0	0	0	0	0	0	0	0	0	0	n	Proteobacteria	0.36	Deltaproteobacteria	0.15			Desulfarculales	0.1			Desulfarculaceae	0.1	Desulfocarbo	0.1
Otu144	0	0	0	0	0	0	1	1	0	0	0	0	0	1	0	0	0	0	0	0	0	2.61766e-05	2.56852e-05	0	0	0	0	0	1.74095e-05	0	n	Proteobacteria	0.61	Deltaproteobacteria	0.39			Myxococcales	0.2			Sandaracinaceae	0.1	Sandaracinus	0.1
Otu1440	0	0	0	0	0	0	0	0	0	0	0	0	0	0	0	0	0	0	0	0	0	0	0	0	0	0	0	0	0	0	n	Armatimonadetes	0.79	Fimbriimonadia	0.7			Fimbriimonadales	0.7			Fimbriimonadaceae	0.7	Fimbriimonas	0.7
Otu1442	0	0	0	0	0	0	0	0	0	0	0	0	0	0	0	0	0	0	0	0	0	0	0	0	0	0	0	0	0	0	n	Proteobacteria	1	Alphaproteobacteria	1			Caulobacterales	0.83			Caulobacteraceae	0.83	Phenylobacterium	0.81
Otu1443	0	0	0	0	0	0	0	0	0	0	0	0	0	0	0	0	0	0	0	0	0	0	0	0	0	0	0	0	0	0	n	Actinobacteria	1	Actinobacteria	1	Actinobacteridae	1	Actinomycetales	1	Micromonosporineae	0.62	Micromonosporaceae	0.62	Actinocatenispora	0.52
Otu1444	0	0	0	0	0	3	0	0	0	0	25	18	13	8	18	0	0	0	0	0	0.000127926	0	0	0	0	0.000367102	0.00042654	0.000245348	0.000139276	0.000318556	n	Proteobacteria	1	Betaproteobacteria	1			Burkholderiales	1			Burkholderiaceae	0.98	Pandoraea	0.87
Otu1445	0	0	0	0	0	0	0	0	0	0	0	0	0	0	0	0	0	0	0	0	0	0	0	0	0	0	0	0	0	0	n	Proteobacteria	0.98	Alphaproteobacteria	0.94			Rhodospirillales	0.92			Acetobacteraceae	0.92	Paracraurococcus	0.56
Otu1446	0	0	0	0	0	0	0	0	0	0	0	0	0	0	0	0	0	0	0	0	0	0	0	0	0	0	0	0	0	0	n	Proteobacteria	1	Alphaproteobacteria	1			Rhodospirillales	0.72			Acetobacteraceae	0.69	Belnapia	0.69
Otu1447	0	0	0	0	0	0	0	0	0	0	0	0	0	0	0	0	0	0	0	0	0	0	0	0	0	0	0	0	0	0	n	Proteobacteria	0.55	Gammaproteobacteria	0.33			Gammaproteobacteria_incertae_sedis	0.23					Candidatus Carsonella	0.23
Otu1448	0	0	0	0	0	0	0	0	0	0	0	0	0	0	0	0	0	0	0	0	0	0	0	0	0	0	0	0	0	0	n	Acidobacteria	0.97	Acidobacteria_Gp3	0.97									Candidatus Solibacter	0.97
Otu1449	0	0	0	0	0	0	0	0	0	0	0	0	0	0	0	0	0	0	0	0	0	0	0	0	0	0	0	0	0	0	n	Acidobacteria	0.97	Acidobacteria_Gp3	0.97									Candidatus Solibacter	0.97
Otu145	0	0	0	0	0	0	0	0	0	0	0	0	0	0	0	0	0	0	0	0	0	0	0	0	0	0	0	0	0	0	n	Acidobacteria	1	Acidobacteria_Gp3	1									Candidatus Solibacter	1
Otu1450	0	0	0	0	0	0	0	0	0	0	0	0	0	0	0	0	0	0	0	0	0	0	0	0	0	0	0	0	0	0	n	Actinobacteria	0.79	Actinobacteria	0.79	Actinobacteridae	0.75	Actinomycetales	0.75	Frankineae	0.74	Geodermatophilaceae	0.73	Modestobacter	0.73
Otu1451	0	0	0	0	0	0	0	0	0	0	0	0	0	0	0	0	0	0	0	0	0	0	0	0	0	0	0	0	0	0	n	Acidobacteria	0.87	Acidobacteria_Gp3	0.87									Candidatus Solibacter	0.87
Otu1452	0	0	0	0	0	0	0	0	0	0	0	0	0	0	0	0	0	0	0	0	0	0	0	0	0	0	0	0	0	0	n	Proteobacteria	0.83	Gammaproteobacteria	0.41			Xanthomonadales	0.4			Xanthomonadaceae	0.4	Fulvimonas	0.23
Otu1453	0	0	0	0	0	0	0	0	0	0	0	0	0	0	0	0	0	0	0	0	0	0	0	0	0	0	0	0	0	0	n	Armatimonadetes	1											Armatimonadetes_gp5	0.88
Otu1454	0	0	0	0	0	0	0	0	0	0	0	0	0	0	0	0	0	0	0	0	0	0	0	0	0	0	0	0	0	0	n	Actinobacteria	1	Actinobacteria	1	Actinobacteridae	1	Actinomycetales	1	Micrococcineae	1	Bogoriellaceae	0.99	Georgenia	0.99
Otu1455	0	0	0	2	0	0	0	0	1	2	0	0	0	0	0	0	0	0	5.29942e-05	0	0	0	0	2.49029e-05	4.0028e-05	0	0	0	0	0	n	Firmicutes	1	Bacilli	1			Bacillales	1			Staphylococcaceae	1	Staphylococcus	1
Otu1456	0	0	0	0	0	0	0	0	0	0	0	0	0	0	0	0	0	0	0	0	0	0	0	0	0	0	0	0	0	0	n	Gemmatimonadetes	0.23	Gemmatimonadetes	0.23			Gemmatimonadales	0.23			Gemmatimonadaceae	0.23	Gemmatimonas	0.23
Otu1457	0	0	0	0	0	0	0	0	0	0	0	0	0	0	0	0	0	0	0	0	0	0	0	0	0	0	0	0	0	0	n	Proteobacteria	0.95	Alphaproteobacteria	0.95			Rhodospirillales	0.4					Reyranella	0.38
Otu1458	0	0	0	0	0	0	0	0	0	0	0	0	0	0	0	0	0	0	0	0	0	0	0	0	0	0	0	0	0	0	n	Proteobacteria	0.99	Betaproteobacteria	0.96			Burkholderiales	0.24			Burkholderiaceae	0.19	Lautropia	0.18
Otu1459	0	0	0	0	0	0	0	0	0	0	0	0	0	0	0	0	0	0	0	0	0	0	0	0	0	0	0	0	0	0	n	Verrucomicrobia	0.5	Subdivision3	0.36									Subdivision3_genera_incertae_sedis	0.29
Otu146	0	0	0	0	0	0	0	0	0	0	0	0	0	0	0	0	0	0	0	0	0	0	0	0	0	0	0	0	0	0	n	Actinobacteria	1	Actinobacteria	1	Actinobacteridae	1	Actinomycetales	1	Micrococcineae	0.41	Microbacteriaceae	0.22	Diaminobutyricibacter	0.1
Otu1460	0	0	0	0	0	0	0	0	0	0	0	0	0	0	0	0	0	0	0	0	0	0	0	0	0	0	0	0	0	0	n	Proteobacteria	1	Betaproteobacteria	0.75			Rhodocyclales	0.67			Rhodocyclaceae	0.67	Uliginosibacterium	0.37
Otu1461	0	0	0	0	0	0	0	0	0	0	0	0	0	0	0	0	0	0	0	0	0	0	0	0	0	0	0	0	0	0	n	Proteobacteria	0.88	Gammaproteobacteria	0.83			Xanthomonadales	0.83			Xanthomonadaceae	0.83	Oleiagrimonas	0.49
Otu1462	0	0	0	0	0	0	0	0	0	0	0	0	0	0	0	0	0	0	0	0	0	0	0	0	0	0	0	0	0	0	n	Chloroflexi	0.63	Thermomicrobia	0.22	Sphaerobacteridae	0.16	Sphaerobacterales	0.16	"Sphaerobacterineae"	0.16	Sphaerobacteraceae	0.16	Nitrolancea	0.15
Otu1463	0	0	0	0	0	0	0	0	0	0	0	0	0	0	0	0	0	0	0	0	0	0	0	0	0	0	0	0	0	0	n	Proteobacteria	0.85	Alphaproteobacteria	0.79			Rhizobiales	0.73			Bradyrhizobiaceae	0.28	Tardiphaga	0.27
Otu1464	0	0	0	0	0	0	0	0	0	0	0	0	0	0	0	0	0	0	0	0	0	0	0	0	0	0	0	0	0	0	n	Proteobacteria	0.82	Alphaproteobacteria	0.38			Rhizobiales	0.3			Roseiarcaceae	0.09	Roseiarcus	0.09
Otu1465	0	0	0	0	0	0	0	0	0	0	0	0	0	0	0	0	0	0	0	0	0	0	0	0	0	0	0	0	0	0	n	Proteobacteria	1	Alphaproteobacteria	0.98			Rhizobiales	0.98			Xanthobacteraceae	0.52	Pseudolabrys	0.52
Otu1466	0	0	0	0	0	0	0	0	0	0	0	0	0	0	0	0	0	0	0	0	0	0	0	0	0	0	0	0	0	0	n	Acidobacteria	0.26	Acidobacteria_Gp3	0.2									Candidatus Solibacter	0.2
Otu1467	0	0	0	0	0	0	0	0	0	0	0	0	0	0	0	0	0	0	0	0	0	0	0	0	0	0	0	0	0	0	n	Cloacimonetes	0.17											Candidatus Cloacamonas	0.17
Otu1468	0	0	0	0	0	0	0	0	0	0	0	0	0	0	0	0	0	0	0	0	0	0	0	0	0	0	0	0	0	0	n	Proteobacteria	0.84	Gammaproteobacteria	0.84			Xanthomonadales	0.84			Xanthomonadaceae	0.84	Fulvimonas	0.44
Otu1469	0	0	0	0	0	0	0	0	0	0	0	0	0	0	0	0	0	0	0	0	0	0	0	0	0	0	0	0	0	0	n	Proteobacteria	1	Betaproteobacteria	0.98			Burkholderiales	0.78			Burkholderiaceae	0.46	Pandoraea	0.35
Otu147	0	0	0	0	0	0	0	0	0	0	0	0	0	0	0	0	0	0	0	0	0	0	0	0	0	0	0	0	0	0	n	Actinobacteria	1	Actinobacteria	1	Actinobacteridae	1	Actinomycetales	1	Frankineae	1	Geodermatophilaceae	1	Modestobacter	0.62
Otu1470	0	0	0	0	0	0	0	0	0	0	0	0	0	0	0	0	0	0	0	0	0	0	0	0	0	0	0	0	0	0	n	Firmicutes	0.7	Bacilli	0.7			Bacillales	0.67			Bacillaceae 1	0.52	Falsibacillus	0.47
Otu1471	0	0	0	0	0	0	0	0	0	0	0	0	0	0	0	0	0	0	0	0	0	0	0	0	0	0	0	0	0	0	n	Cloacimonetes	0.23											Candidatus Cloacamonas	0.23
Otu1472	0	0	0	0	0	0	0	0	0	0	0	0	0	0	0	0	0	0	0	0	0	0	0	0	0	0	0	0	0	0	n	Actinobacteria	0.59	Actinobacteria	0.59	Acidimicrobidae	0.51	Acidimicrobiales	0.51	"Acidimicrobineae"	0.51	Iamiaceae	0.39	Aquihabitans	0.39
Otu1473	0	0	0	0	0	0	0	0	0	0	0	0	0	0	0	0	0	0	0	0	0	0	0	0	0	0	0	0	0	0	n	Actinobacteria	1	Actinobacteria	1	Actinobacteridae	1	Actinomycetales	1	Catenulisporineae	1	Catenulisporaceae	1	Catenulispora	1
Otu1474	0	0	0	0	0	0	0	0	0	0	0	0	0	0	0	0	0	0	0	0	0	0	0	0	0	0	0	0	0	0	n	Actinobacteria	0.95	Actinobacteria	0.95	Rubrobacteridae	0.54	Gaiellales	0.54			Gaiellaceae	0.54	Gaiella	0.54
Otu1475	0	0	0	0	0	0	0	0	0	0	0	0	0	0	0	0	0	0	0	0	0	0	0	0	0	0	0	0	0	0	n	Actinobacteria	0.8	Actinobacteria	0.8	Actinobacteridae	0.8	Actinomycetales	0.8	Propionibacterineae	0.76	Propionibacteriaceae	0.76	Propioniciclava	0.25
Otu1476	0	0	0	0	0	0	0	0	0	0	0	0	0	0	0	0	0	0	0	0	0	0	0	0	0	0	0	0	0	0	n	Proteobacteria	0.69	Alphaproteobacteria	0.67			Rhizobiales	0.67			Bradyrhizobiaceae	0.65	Tardiphaga	0.63
Otu1477	0	0	0	0	0	0	0	0	0	0	0	0	0	0	0	0	0	0	0	0	0	0	0	0	0	0	0	0	0	0	n	Firmicutes	0.79	Bacilli	0.53			Bacillales	0.53			Bacillaceae 1	0.11	Falsibacillus	0.1
Otu1478	0	0	0	0	0	0	0	0	0	0	0	0	0	0	0	0	0	0	0	0	0	0	0	0	0	0	0	0	0	0	n	Proteobacteria	1	Betaproteobacteria	0.99			Rhodocyclales	0.63			Rhodocyclaceae	0.63	Denitratisoma	0.19
Otu1479	0	0	0	0	0	0	0	0	0	0	0	0	0	0	0	0	0	0	0	0	0	0	0	0	0	0	0	0	0	0	n	Acidobacteria	0.81	Acidobacteria_Gp3	0.79									Candidatus Solibacter	0.79
Otu148	0	0	0	0	0	0	0	0	0	0	0	0	0	0	0	0	0	0	0	0	0	0	0	0	0	0	0	0	0	0	n	Proteobacteria	1	Gammaproteobacteria	1			Xanthomonadales	1			Xanthomonadaceae	1	Arenimonas	1
Otu1480	0	0	0	0	0	0	0	0	0	0	0	0	0	0	0	0	0	0	0	0	0	0	0	0	0	0	0	0	0	0	n	Proteobacteria	1	Betaproteobacteria	1			Burkholderiales	0.98			Burkholderiales_incertae_sedis	0.67	Aquincola	0.51
Otu1481	0	0	0	0	0	0	0	0	0	0	0	0	0	0	0	0	0	0	0	0	0	0	0	0	0	0	0	0	0	0	n	Proteobacteria	0.72	Deltaproteobacteria	0.65			Bdellovibrionales	0.5			Bacteriovoracaceae	0.5	Bacteriovorax	0.31
Otu1482	0	0	0	0	0	0	0	0	0	0	0	0	0	0	0	0	0	0	0	0	0	0	0	0	0	0	0	0	0	0	n	Proteobacteria	0.78	Betaproteobacteria	0.78									Chitinivorax	0.26
Otu1483	0	0	0	0	0	0	0	0	0	0	0	0	0	0	0	0	0	0	0	0	0	0	0	0	0	0	0	0	0	0	n	Proteobacteria	0.97	Betaproteobacteria	0.92			Burkholderiales	0.92			Burkholderiales_incertae_sedis	0.84	Piscinibacter	0.51
Otu1484	0	0	0	0	0	0	0	0	0	0	0	0	0	0	0	0	0	0	0	0	0	0	0	0	0	0	0	0	0	0	n	Actinobacteria	0.53	Actinobacteria	0.53	Rubrobacteridae	0.49	Gaiellales	0.49			Gaiellaceae	0.49	Gaiella	0.49
Otu1485	0	0	0	0	0	0	0	0	0	0	0	0	0	0	0	0	0	0	0	0	0	0	0	0	0	0	0	0	0	0	n	Proteobacteria	0.79	Deltaproteobacteria	0.62			Myxococcales	0.55	Cystobacterineae	0.55	Myxococcaceae	0.32	Aggregicoccus	0.27
Otu1486	18	17	9	56	32	5	5	7	6	0	0	0	0	0	1	0.000512499	0.00071909	0.000329525	0.00148384	0.00117699	0.000213211	0.000130883	0.000179796	0.000149417	0	0	0	0	0	1.76975e-05	n	Proteobacteria	1	Betaproteobacteria	0.97			Burkholderiales	0.89			Oxalobacteraceae	0.55	Duganella	0.44
Otu1487	0	0	0	0	0	0	0	0	0	0	0	0	0	0	0	0	0	0	0	0	0	0	0	0	0	0	0	0	0	0	n	Proteobacteria	0.98	Betaproteobacteria	0.83			Burkholderiales	0.82			Burkholderiales_incertae_sedis	0.45	Methylibium	0.38
Otu1488	0	0	0	0	0	0	0	0	0	0	0	0	0	0	0	0	0	0	0	0	0	0	0	0	0	0	0	0	0	0	n	Proteobacteria	1	Alphaproteobacteria	1			Rhizobiales	0.97			Phyllobacteriaceae	0.34	Chelativorans	0.25
Otu1489	0	0	0	0	0	0	0	0	0	0	0	0	0	0	0	0	0	0	0	0	0	0	0	0	0	0	0	0	0	0	n	Firmicutes	1	Clostridia	1			Clostridiales	1			Clostridiales_Incertae Sedis XIII	0.84	Anaerovorax	0.84
Otu149	0	0	0	0	0	0	0	0	0	0	16	3	52	9	4	0	0	0	0	0	0	0	0	0	0	0.000234945	7.109e-05	0.000981391	0.000156685	7.07902e-05	n	Proteobacteria	1	Betaproteobacteria	0.97			Hydrogenophilales	0.43			Hydrogenophilaceae	0.43	Thiobacillus	0.43
Otu1490	0	0	0	0	0	0	0	0	0	0	0	0	0	0	0	0	0	0	0	0	0	0	0	0	0	0	0	0	0	0	n	Acidobacteria	0.85	Acidobacteria_Gp3	0.85									Candidatus Solibacter	0.85
Otu1491	0	0	0	0	0	0	0	0	0	0	0	0	0	0	0	0	0	0	0	0	0	0	0	0	0	0	0	0	0	0	n	Proteobacteria	0.8	Betaproteobacteria	0.65			Burkholderiales	0.55			Oxalobacteraceae	0.5	Paraherbaspirillum	0.26
Otu1492	0	0	0	0	0	0	0	0	0	0	0	0	0	0	0	0	0	0	0	0	0	0	0	0	0	0	0	0	0	0	n	Acidobacteria	0.97	Acidobacteria_Gp3	0.97									Candidatus Solibacter	0.89
Otu1493	0	0	0	0	0	0	0	0	0	0	0	0	0	0	0	0	0	0	0	0	0	0	0	0	0	0	0	0	0	0	n	Actinobacteria	0.89	Actinobacteria	0.89	Rubrobacteridae	0.86	Gaiellales	0.55			Gaiellaceae	0.55	Gaiella	0.55
Otu1494	0	0	0	0	0	0	0	0	0	0	0	0	0	0	0	0	0	0	0	0	0	0	0	0	0	0	0	0	0	0	n	Proteobacteria	0.79	Betaproteobacteria	0.38			Rhodocyclales	0.25			Rhodocyclaceae	0.25	Ferribacterium	0.23
Otu1495	0	0	0	0	0	0	0	0	0	0	0	0	0	0	0	0	0	0	0	0	0	0	0	0	0	0	0	0	0	0	n	Proteobacteria	0.99	Alphaproteobacteria	0.9			Rhizobiales	0.67			Roseiarcaceae	0.26	Roseiarcus	0.26
Otu1496	0	0	0	0	0	0	0	0	0	0	0	0	0	0	0	0	0	0	0	0	0	0	0	0	0	0	0	0	0	0	n	Proteobacteria	0.62	Betaproteobacteria	0.57			Rhodocyclales	0.37			Rhodocyclaceae	0.37	Sterolibacterium	0.33
Otu1497	0	0	0	0	0	0	0	0	0	0	0	0	0	0	0	0	0	0	0	0	0	0	0	0	0	0	0	0	0	0	n	Planctomycetes	0.61	Phycisphaerae	0.41			Phycisphaerales	0.37			Phycisphaeraceae	0.37	Phycisphaera	0.37
Otu1498	0	0	0	0	0	0	0	0	0	0	0	0	0	0	0	0	0	0	0	0	0	0	0	0	0	0	0	0	0	0	n	Proteobacteria	1	Betaproteobacteria	0.99			Neisseriales	0.35			Neisseriaceae	0.35	Aquitalea	0.28
Otu1499	0	0	0	0	0	0	0	0	0	0	0	0	0	0	0	0	0	0	0	0	0	0	0	0	0	0	0	0	0	0	n	Proteobacteria	1	Betaproteobacteria	0.8			Burkholderiales	0.8			Oxalobacteraceae	0.76	Paraherbaspirillum	0.16
Otu15	27	3	38	2	15	0	0	0	0	0	0	0	0	0	1	0.000768749	0.000126898	0.00139133	5.29942e-05	0.000551714	0	0	0	0	0	0	0	0	0	1.76975e-05	n	Proteobacteria	1	Alphaproteobacteria	1			Caulobacterales	1			Caulobacteraceae	1	Brevundimonas	1
Otu150	0	0	0	0	0	0	0	0	0	0	0	0	0	0	0	0	0	0	0	0	0	0	0	0	0	0	0	0	0	0	n	Bacteroidetes	1	Sphingobacteriia	0.58			"Sphingobacteriales"	0.58			Chitinophagaceae	0.4	Parafilimonas	0.21
Otu1500	0	0	0	0	0	0	0	0	0	0	0	0	0	0	0	0	0	0	0	0	0	0	0	0	0	0	0	0	0	0	n	Actinobacteria	0.71	Actinobacteria	0.67	Rubrobacteridae	0.58	Solirubrobacterales	0.58			Conexibacteraceae	0.58	Conexibacter	0.58
Otu1501	0	0	0	0	0	0	0	0	0	0	0	0	0	0	0	0	0	0	0	0	0	0	0	0	0	0	0	0	0	0	n	Acidobacteria	0.97	Acidobacteria_Gp3	0.96									Candidatus Solibacter	0.94
Otu1502	0	0	0	0	0	0	0	0	0	0	0	0	0	0	0	0	0	0	0	0	0	0	0	0	0	0	0	0	0	0	n	Actinobacteria	0.95	Actinobacteria	0.95	Acidimicrobidae	0.73	Acidimicrobiales	0.73	"Acidimicrobineae"	0.73	"Acidimicrobineae"_incertae_sedis	0.71	Aciditerrimonas	0.71
Otu1503	0	0	0	0	0	0	0	0	0	0	0	0	0	0	0	0	0	0	0	0	0	0	0	0	0	0	0	0	0	0	n	Proteobacteria	0.68	Alphaproteobacteria	0.67			Rhizobiales	0.66			Methylocystaceae	0.24	Methylosinus	0.14
Otu1504	0	0	0	0	0	0	0	0	0	0	0	0	0	0	0	0	0	0	0	0	0	0	0	0	0	0	0	0	0	0	n	Acidobacteria	0.41	Acidobacteria_Gp3	0.32									Bryobacter	0.32
Otu1505	0	0	0	0	0	0	0	0	0	0	0	0	0	0	0	0	0	0	0	0	0	0	0	0	0	0	0	0	0	0	n	Acidobacteria	0.79	Acidobacteria_Gp3	0.78									Candidatus Solibacter	0.78
Otu1506	0	0	0	0	0	0	0	0	0	0	0	0	0	0	0	0	0	0	0	0	0	0	0	0	0	0	0	0	0	0	n	Bacteroidetes	1	Sphingobacteriia	1			"Sphingobacteriales"	1			Chitinophagaceae	1	Niabella	0.93
Otu1507	0	0	0	0	0	0	0	0	0	0	0	0	0	0	0	0	0	0	0	0	0	0	0	0	0	0	0	0	0	0	n	Acidobacteria	1	Acidobacteria_Gp1	0.97									Telmatobacter	0.53
Otu1508	0	0	0	0	0	0	0	0	0	0	0	0	0	0	0	0	0	0	0	0	0	0	0	0	0	0	0	0	0	0	n	Proteobacteria	0.79	Alphaproteobacteria	0.76			Rhizobiales	0.75			Xanthobacteraceae	0.39	Pseudolabrys	0.39
Otu1509	0	0	0	0	0	0	0	0	0	0	0	0	0	0	0	0	0	0	0	0	0	0	0	0	0	0	0	0	0	0	n	Proteobacteria	1	Gammaproteobacteria	0.94			Xanthomonadales	0.94			Xanthomonadaceae	0.94	Oleiagrimonas	0.68
Otu151	0	0	0	0	0	0	0	0	0	0	0	0	0	0	0	0	0	0	0	0	0	0	0	0	0	0	0	0	0	0	n	Proteobacteria	1	Gammaproteobacteria	0.99			Xanthomonadales	0.74			Sinobacteraceae	0.72	Hydrocarboniphaga	0.5
Otu1510	0	0	0	0	0	0	0	0	0	0	0	0	0	0	0	0	0	0	0	0	0	0	0	0	0	0	0	0	0	0	n	Chloroflexi	0.58	Thermomicrobia	0.41	Sphaerobacteridae	0.4	Sphaerobacterales	0.4	"Sphaerobacterineae"	0.4	Sphaerobacteraceae	0.4	Nitrolancea	0.32
Otu1511	0	0	0	0	0	0	0	0	0	0	0	0	0	0	0	0	0	0	0	0	0	0	0	0	0	0	0	0	0	0	n	Actinobacteria	0.9	Actinobacteria	0.9	Actinobacteridae	0.88	Actinomycetales	0.87	Propionibacterineae	0.63	Propionibacteriaceae	0.47	Brooklawnia	0.34
Otu1512	0	0	0	0	0	0	0	0	0	0	0	0	0	0	0	0	0	0	0	0	0	0	0	0	0	0	0	0	0	0	n	Actinobacteria	1	Actinobacteria	1	Actinobacteridae	1	Actinomycetales	1	Micrococcineae	1	Promicromonosporaceae	1	Promicromonospora	1
Otu1513	0	0	0	0	0	0	0	0	0	0	0	0	0	0	0	0	0	0	0	0	0	0	0	0	0	0	0	0	0	0	n	Proteobacteria	0.89	Betaproteobacteria	0.82			Rhodocyclales	0.25			Rhodocyclaceae	0.25	Sterolibacterium	0.14
Otu1514	0	0	0	0	0	0	0	0	0	0	0	0	0	0	0	0	0	0	0	0	0	0	0	0	0	0	0	0	0	0	n	Actinobacteria	0.99	Actinobacteria	0.98	Rubrobacteridae	0.26	Gaiellales	0.19			Gaiellaceae	0.19	Gaiella	0.19
Otu1515	0	0	0	0	0	0	0	0	0	0	0	0	0	0	0	0	0	0	0	0	0	0	0	0	0	0	0	0	0	0	n	Acidobacteria	0.43	Acidobacteria_Gp3	0.43									Candidatus Solibacter	0.43
Otu1516	0	0	0	0	0	0	0	0	0	0	0	0	0	0	0	0	0	0	0	0	0	0	0	0	0	0	0	0	0	0	n	Proteobacteria	0.87	Betaproteobacteria	0.53			Rhodocyclales	0.34			Rhodocyclaceae	0.34	Azovibrio	0.11
Otu1517	0	0	0	0	0	0	0	0	0	0	0	0	0	0	0	0	0	0	0	0	0	0	0	0	0	0	0	0	0	0	n	Proteobacteria	1	Alphaproteobacteria	0.97			Rhizobiales	0.91			Rhodobiaceae	0.18	Rhodoligotrophos	0.1
Otu1518	0	0	0	0	0	0	0	0	0	0	0	0	0	0	0	0	0	0	0	0	0	0	0	0	0	0	0	0	0	0	n	Firmicutes	0.85	Bacilli	0.85			Bacillales	0.85			Bacillaceae 1	0.6	Falsibacillus	0.52
Otu1519	0	0	0	0	0	0	0	0	0	0	0	0	0	0	0	0	0	0	0	0	0	0	0	0	0	0	0	0	0	0	n	Proteobacteria	0.54	Deltaproteobacteria	0.33			Syntrophobacterales	0.16			Syntrophaceae	0.05	Desulfobacca	0.04
Otu152	0	0	0	0	0	0	0	0	0	0	0	0	0	0	0	0	0	0	0	0	0	0	0	0	0	0	0	0	0	0	n	Planctomycetes	0.8	Phycisphaerae	0.51			Phycisphaerales	0.44			Phycisphaeraceae	0.44	Phycisphaera	0.44
Otu1520	0	0	0	0	0	0	0	0	0	0	0	0	0	0	0	0	0	0	0	0	0	0	0	0	0	0	0	0	0	0	n	Proteobacteria	0.53	Deltaproteobacteria	0.49			Bdellovibrionales	0.49			Bacteriovoracaceae	0.49	Peredibacter	0.47
Otu1521	0	0	0	0	0	0	0	0	0	0	0	0	0	0	0	0	0	0	0	0	0	0	0	0	0	0	0	0	0	0	n	Proteobacteria	0.99	Deltaproteobacteria	0.68			Myxococcales	0.59	Cystobacterineae	0.59	Myxococcaceae	0.46	Aggregicoccus	0.3
Otu1522	0	0	0	0	0	0	0	0	0	0	0	0	0	0	0	0	0	0	0	0	0	0	0	0	0	0	0	0	0	0	n	Proteobacteria	0.96	Alphaproteobacteria	0.86			Rhizobiales	0.86			Xanthobacteraceae	0.35	Pseudolabrys	0.34
Otu1523	0	0	0	0	0	0	0	0	0	0	0	0	0	0	0	0	0	0	0	0	0	0	0	0	0	0	0	0	0	0	n	Proteobacteria	1	Betaproteobacteria	1			Burkholderiales	0.93			Oxalobacteraceae	0.54	Glaciimonas	0.23
Otu1524	0	0	0	0	0	0	0	0	0	0	0	0	0	0	0	0	0	0	0	0	0	0	0	0	0	0	0	0	0	0	n	Actinobacteria	1	Actinobacteria	1	Actinobacteridae	1	Actinomycetales	1	Micromonosporineae	0.77	Micromonosporaceae	0.77	Pilimelia	0.51
Otu1525	0	0	0	0	0	0	0	0	0	0	0	0	0	0	0	0	0	0	0	0	0	0	0	0	0	0	0	0	0	0	n	Acidobacteria	0.27	Acidobacteria_Gp1	0.27									Candidatus Koribacter	0.27
Otu1526	0	0	0	0	0	0	0	0	0	0	0	0	0	0	0	0	0	0	0	0	0	0	0	0	0	0	0	0	0	0	n	Acidobacteria	0.19	Acidobacteria_Gp1	0.08									Bryocella	0.05
Otu1527	0	0	0	0	0	0	0	0	0	0	3	0	0	1	0	0	0	0	0	0	0	0	0	0	0	4.40522e-05	0	0	1.74095e-05	0	n	Proteobacteria	1	Betaproteobacteria	0.98			Burkholderiales	0.98			Burkholderiales_incertae_sedis	0.25	Xylophilus	0.23
Otu1528	0	0	0	0	0	0	0	0	0	0	0	0	0	0	0	0	0	0	0	0	0	0	0	0	0	0	0	0	0	0	n	Proteobacteria	0.91	Alphaproteobacteria	0.77			Sphingomonadales	0.77			Sphingomonadaceae	0.69	Rhizorhabdus	0.54
Otu1529	0	0	0	0	0	0	0	0	0	0	0	0	0	0	0	0	0	0	0	0	0	0	0	0	0	0	0	0	0	0	n	Proteobacteria	1	Betaproteobacteria	0.53			Burkholderiales	0.46			Burkholderiaceae	0.38	Paucimonas	0.34
Otu153	0	1	2	114	2	0	6	0	0	0	1	1	10	0	0	0	4.22994e-05	7.32279e-05	0.00302067	7.35619e-05	0	0.00015706	0	0	0	1.46841e-05	2.36967e-05	0.000188729	0	0	n	Firmicutes	1	Bacilli	1			Bacillales	1			Paenibacillaceae 1	1	Paenibacillus	1
Otu1530	0	0	2	13	16	2	6	4	10	0	71	9	79	81	56	0	0	7.32279e-05	0.000344462	0.000588495	8.52842e-05	0.00015706	0.000102741	0.000249029	0	0.00104257	0.00021327	0.00149096	0.00141017	0.000991063	n	Proteobacteria	1	Betaproteobacteria	1			Burkholderiales	1			Oxalobacteraceae	0.62	Herbaspirillum	0.27
Otu1531	0	0	0	0	0	0	0	0	0	0	0	0	0	0	0	0	0	0	0	0	0	0	0	0	0	0	0	0	0	0	n	Proteobacteria	0.81	Alphaproteobacteria	0.52			Sphingomonadales	0.41			Sphingomonadaceae	0.28	Rhizorhabdus	0.23
Otu1532	0	0	0	0	0	0	0	0	0	0	0	3	0	0	2	0	0	0	0	0	0	0	0	0	0	0	7.109e-05	0	0	3.53951e-05	n	Proteobacteria	0.9	Betaproteobacteria	0.9			Burkholderiales	0.87			Burkholderiaceae	0.46	Paucimonas	0.35
Otu1533	0	0	0	0	0	0	0	0	0	0	0	0	0	0	0	0	0	0	0	0	0	0	0	0	0	0	0	0	0	0	n	Actinobacteria	0.51	Actinobacteria	0.51	Actinobacteridae	0.51	Actinomycetales	0.51	Micrococcineae	0.39	Intrasporangiaceae	0.16	Ornithinicoccus	0.14
Otu1534	0	0	0	0	0	0	0	0	0	0	0	0	0	0	0	0	0	0	0	0	0	0	0	0	0	0	0	0	0	0	n	Actinobacteria	0.89	Actinobacteria	0.89	Actinobacteridae	0.89	Actinomycetales	0.89	Micrococcineae	0.89	Microbacteriaceae	0.87	Okibacterium	0.24
Otu1535	0	0	0	0	0	0	0	0	0	0	0	0	0	0	0	0	0	0	0	0	0	0	0	0	0	0	0	0	0	0	n	Proteobacteria	0.95	Betaproteobacteria	0.93			Rhodocyclales	0.55			Rhodocyclaceae	0.55	Methyloversatilis	0.28
Otu1536	0	0	0	0	0	0	0	0	0	0	0	0	0	0	0	0	0	0	0	0	0	0	0	0	0	0	0	0	0	0	n	Proteobacteria	1	Betaproteobacteria	0.63			Burkholderiales	0.57			Oxalobacteraceae	0.56	Paraherbaspirillum	0.44
Otu1537	0	0	0	0	0	0	0	0	0	0	0	0	0	0	0	0	0	0	0	0	0	0	0	0	0	0	0	0	0	0	n	Deinococcus-Thermus	0.4	Deinococci	0.4			Deinococcales	0.4			Trueperaceae	0.4	Truepera	0.4
Otu1538	1	0	1	1	0	115	41	492	76	6	0	0	0	1	2	2.84722e-05	0	3.66139e-05	2.64971e-05	0	0.00490384	0.00107324	0.0126371	0.00189262	0.000120084	0	0	0	1.74095e-05	3.53951e-05	n	Proteobacteria	1	Betaproteobacteria	1			Burkholderiales	1			Oxalobacteraceae	1	Duganella	0.97
Otu1539	0	0	0	0	0	0	0	0	0	0	0	0	0	0	0	0	0	0	0	0	0	0	0	0	0	0	0	0	0	0	n	Firmicutes	1	Clostridia	1			Clostridiales	1			Clostridiaceae 1	0.99	Clostridium sensu stricto	0.98
Otu154	0	0	0	0	0	0	0	0	0	0	0	1	0	0	0	0	0	0	0	0	0	0	0	0	0	0	2.36967e-05	0	0	0	n	Proteobacteria	1	Alphaproteobacteria	1			Rhizobiales	0.99			Beijerinckiaceae	0.56	Chelatococcus	0.26
Otu1540	0	0	0	0	0	0	0	0	0	0	0	0	0	0	0	0	0	0	0	0	0	0	0	0	0	0	0	0	0	0	n	Proteobacteria	1	Betaproteobacteria	0.96			Burkholderiales	0.84			Oxalobacteraceae	0.72	Rugamonas	0.35
Otu1541	0	0	0	0	0	0	0	0	0	0	0	0	0	0	0	0	0	0	0	0	0	0	0	0	0	0	0	0	0	0	n	Actinobacteria	0.36	Actinobacteria	0.36	Actinobacteridae	0.29	Actinomycetales	0.29	Propionibacterineae	0.21	Propionibacteriaceae	0.13	Micropruina	0.09
Otu1542	0	0	0	0	0	2	0	0	1	0	0	0	0	0	0	0	0	0	0	0	8.52842e-05	0	0	2.49029e-05	0	0	0	0	0	0	n	Proteobacteria	1	Betaproteobacteria	1			Burkholderiales	1			Oxalobacteraceae	0.94	Massilia	0.56
Otu1543	0	0	0	0	0	0	0	0	0	0	0	0	0	0	0	0	0	0	0	0	0	0	0	0	0	0	0	0	0	0	n	Proteobacteria	0.42	Gammaproteobacteria	0.15			Gammaproteobacteria_incertae_sedis	0.06					Thiohalorhabdus	0.05
Otu1544	0	0	0	0	0	0	0	0	0	0	0	0	0	0	0	0	0	0	0	0	0	0	0	0	0	0	0	0	0	0	n	Proteobacteria	0.47	Deltaproteobacteria	0.2			Syntrophobacterales	0.16			Syntrophobacteraceae	0.15	Desulfoglaeba	0.12
Otu1545	0	0	0	0	0	0	0	0	0	0	0	0	0	0	0	0	0	0	0	0	0	0	0	0	0	0	0	0	0	0	n	Actinobacteria	0.72	Actinobacteria	0.72	Actinobacteridae	0.72	Actinomycetales	0.72	Micromonosporineae	0.72	Micromonosporaceae	0.72	Hamadaea	0.55
Otu1546	0	0	0	0	0	0	0	0	0	0	0	0	0	0	0	0	0	0	0	0	0	0	0	0	0	0	0	0	0	0	n	Proteobacteria	1	Betaproteobacteria	1			Burkholderiales	0.92			Oxalobacteraceae	0.36	Oxalicibacterium	0.31
Otu1547	0	0	0	0	0	0	0	0	0	0	0	0	0	0	0	0	0	0	0	0	0	0	0	0	0	0	0	0	0	0	n	Proteobacteria	0.54	Betaproteobacteria	0.28			Burkholderiales	0.19			Burkholderiaceae	0.1	Lautropia	0.1
Otu1548	0	0	0	0	0	0	0	0	0	0	0	0	0	0	0	0	0	0	0	0	0	0	0	0	0	0	0	0	0	0	n	Proteobacteria	1	Betaproteobacteria	1			Burkholderiales	0.98			Burkholderiales_incertae_sedis	0.71	Ideonella	0.68
Otu1549	0	0	0	0	0	0	0	0	0	0	0	0	0	0	0	0	0	0	0	0	0	0	0	0	0	0	0	0	0	0	n	Proteobacteria	0.92	Betaproteobacteria	0.92			Burkholderiales	0.92			Burkholderiaceae	0.42	Paucimonas	0.22
Otu155	0	0	0	0	0	0	0	0	0	0	0	0	0	0	0	0	0	0	0	0	0	0	0	0	0	0	0	0	0	0	n	Proteobacteria	1	Alphaproteobacteria	1			Rhodospirillales	0.84			Rhodospirillaceae	0.66	Dongia	0.17
Otu1550	0	0	0	0	0	0	0	0	0	0	0	0	0	0	0	0	0	0	0	0	0	0	0	0	0	0	0	0	0	0	n	Proteobacteria	1	Betaproteobacteria	0.99			Burkholderiales	0.93			Oxalobacteraceae	0.91	Duganella	0.73
Otu1551	0	0	0	0	0	0	0	0	0	0	0	0	0	0	0	0	0	0	0	0	0	0	0	0	0	0	0	0	0	0	n	Proteobacteria	0.79	Alphaproteobacteria	0.75			Rhizobiales	0.63			Bradyrhizobiaceae	0.63	Tardiphaga	0.56
Otu1552	0	0	0	0	0	0	0	0	0	0	0	0	0	0	0	0	0	0	0	0	0	0	0	0	0	0	0	0	0	0	n	Actinobacteria	0.86	Actinobacteria	0.86	Actinobacteridae	0.86	Actinomycetales	0.86	Micrococcineae	0.71	Microbacteriaceae	0.71	Diaminobutyricibacter	0.24
Otu1553	0	0	0	0	0	0	0	0	0	0	0	0	0	0	0	0	0	0	0	0	0	0	0	0	0	0	0	0	0	0	n	Acidobacteria	0.76	Acidobacteria_Gp1	0.63									Bryocella	0.62
Otu1554	0	0	0	0	0	0	0	0	0	0	0	0	0	0	0	0	0	0	0	0	0	0	0	0	0	0	0	0	0	0	n	Proteobacteria	0.81	Betaproteobacteria	0.81			Burkholderiales	0.81			Burkholderiales_incertae_sedis	0.35	Xylophilus	0.34
Otu1555	0	0	0	0	0	0	0	0	0	0	0	0	0	0	0	0	0	0	0	0	0	0	0	0	0	0	0	0	0	0	n	Proteobacteria	0.86	Alphaproteobacteria	0.79			Caulobacterales	0.65			Hyphomonadaceae	0.56	Robiginitomaculum	0.45
Otu1556	0	0	0	0	0	0	0	0	0	0	0	0	0	0	0	0	0	0	0	0	0	0	0	0	0	0	0	0	0	0	n	Proteobacteria	0.28	Alphaproteobacteria	0.11			Rhodospirillales	0.07			Rhodospirillaceae	0.07	Aestuariispira	0.07
Otu1557	0	0	0	0	0	0	0	0	0	0	0	0	0	0	0	0	0	0	0	0	0	0	0	0	0	0	0	0	0	0	n	Proteobacteria	1	Alphaproteobacteria	1			Rhizobiales	1			Rhizobiales_incertae_sedis	0.57	Hartmannibacter	0.57
Otu1558	0	0	0	0	1	0	3	5	0	0	0	0	0	0	0	0	0	0	0	3.67809e-05	0	7.85299e-05	0.000128426	0	0	0	0	0	0	0	n	Proteobacteria	1	Betaproteobacteria	1			Burkholderiales	0.96			Oxalobacteraceae	0.6	Duganella	0.51
Otu1559	0	0	0	0	0	2	0	0	0	0	0	0	0	0	0	0	0	0	0	0	8.52842e-05	0	0	0	0	0	0	0	0	0	n	Actinobacteria	0.71	Actinobacteria	0.71	Actinobacteridae	0.71	Actinomycetales	0.71	Micrococcineae	0.7	Microbacteriaceae	0.7	Okibacterium	0.38
Otu156	0	0	0	0	0	0	0	0	0	0	0	0	0	0	0	0	0	0	0	0	0	0	0	0	0	0	0	0	0	0	n	Firmicutes	1	Bacilli	0.98			Bacillales	0.98			Paenibacillaceae 1	0.98	Paenibacillus	0.62
Otu1560	0	0	0	0	0	0	0	0	0	0	0	0	0	0	0	0	0	0	0	0	0	0	0	0	0	0	0	0	0	0	n	Actinobacteria	1	Actinobacteria	1	Acidimicrobidae	0.87	Acidimicrobiales	0.87	"Acidimicrobineae"	0.87	"Acidimicrobineae"_incertae_sedis	0.64	Aciditerrimonas	0.64
Otu1561	0	0	0	0	0	0	0	0	0	0	0	0	0	0	0	0	0	0	0	0	0	0	0	0	0	0	0	0	0	0	n	Chlamydiae	0.41	Chlamydiia	0.41			Chlamydiales	0.41			Parachlamydiaceae	0.41	Parachlamydia	0.41
Otu1562	0	0	0	0	0	0	0	0	0	0	0	0	0	0	0	0	0	0	0	0	0	0	0	0	0	0	0	0	0	0	n	Proteobacteria	0.97	Alphaproteobacteria	0.87			Rhizobiales	0.59			Hyphomicrobiaceae	0.33	Prosthecomicrobium	0.33
Otu1563	0	0	0	0	0	0	0	0	0	0	0	0	0	0	0	0	0	0	0	0	0	0	0	0	0	0	0	0	0	0	n	Proteobacteria	1	Betaproteobacteria	1			Burkholderiales	0.92			Oxalobacteraceae	0.88	Massilia	0.39
Otu1564	0	0	0	0	0	0	0	0	0	0	0	0	0	0	0	0	0	0	0	0	0	0	0	0	0	0	0	0	0	0	n	Deinococcus-Thermus	1	Deinococci	1			Deinococcales	1			Deinococcaceae	1	Deinococcus	1
Otu1565	0	0	0	0	0	0	0	0	0	0	0	0	0	0	0	0	0	0	0	0	0	0	0	0	0	0	0	0	0	0	n	Proteobacteria	0.72	Betaproteobacteria	0.35			Burkholderiales	0.23			Oxalobacteraceae	0.11	Paraherbaspirillum	0.07
Otu1566	0	0	0	0	0	0	0	0	0	0	0	0	0	0	0	0	0	0	0	0	0	0	0	0	0	0	0	0	0	0	n	Proteobacteria	0.94	Oligoflexia	0.47			Oligoflexales	0.47			Oligoflexaceae	0.47	Oligoflexus	0.47
Otu1567	0	0	0	0	0	0	0	0	0	0	0	0	0	0	0	0	0	0	0	0	0	0	0	0	0	0	0	0	0	0	n	Proteobacteria	0.87	Alphaproteobacteria	0.84			Rhizobiales	0.83			Bradyrhizobiaceae	0.75	Tardiphaga	0.74
Otu1568	0	0	0	0	0	0	0	0	0	0	0	0	0	0	0	0	0	0	0	0	0	0	0	0	0	0	0	0	0	0	n	Proteobacteria	1	Betaproteobacteria	1			Burkholderiales	1			Burkholderiaceae	0.96	Limnobacter	0.96
Otu1569	0	0	0	0	0	0	0	0	0	0	0	0	0	0	0	0	0	0	0	0	0	0	0	0	0	0	0	0	0	0	n	Verrucomicrobia	0.55	Subdivision3	0.4									Subdivision3_genera_incertae_sedis	0.38
Otu157	0	0	0	0	0	0	0	0	0	0	0	0	0	0	0	0	0	0	0	0	0	0	0	0	0	0	0	0	0	0	n	Actinobacteria	1	Actinobacteria	1	Rubrobacteridae	0.99	Gaiellales	0.99			Gaiellaceae	0.99	Gaiella	0.99
Otu1570	0	0	0	0	0	0	0	0	0	0	0	0	0	0	0	0	0	0	0	0	0	0	0	0	0	0	0	0	0	0	n	Proteobacteria	0.88	Alphaproteobacteria	0.64			Rhodospirillales	0.48			Acetobacteraceae	0.35	Humitalea	0.11
Otu1571	0	0	0	0	0	0	0	0	0	0	0	0	0	0	0	0	0	0	0	0	0	0	0	0	0	0	0	0	0	0	n	Proteobacteria	0.79	Alphaproteobacteria	0.52			Rhizobiales	0.52			Roseiarcaceae	0.27	Roseiarcus	0.27
Otu1572	0	0	0	0	0	0	0	0	0	0	0	0	0	0	0	0	0	0	0	0	0	0	0	0	0	0	0	0	0	0	n	Proteobacteria	0.98	Betaproteobacteria	0.77			Burkholderiales	0.77			Burkholderiales_incertae_sedis	0.77	Piscinibacter	0.49
Otu1573	0	0	0	0	0	0	0	0	0	0	0	0	0	0	0	0	0	0	0	0	0	0	0	0	0	0	0	0	0	0	n	Acidobacteria	0.85	Holophagae	0.36			Holophagales	0.36			Holophagaceae	0.36	Holophaga	0.24
Otu1574	0	0	0	0	0	0	0	0	0	0	0	0	0	0	0	0	0	0	0	0	0	0	0	0	0	0	0	0	0	0	n	Acidobacteria	1	Acidobacteria_Gp2	1									Gp2	1
Otu1575	0	0	0	0	0	0	0	0	0	0	0	0	0	0	0	0	0	0	0	0	0	0	0	0	0	0	0	0	0	0	n	Proteobacteria	0.85	Alphaproteobacteria	0.84			Rhizobiales	0.84			Xanthobacteraceae	0.47	Pseudolabrys	0.47
Otu1576	0	0	0	0	0	0	0	0	0	0	0	0	0	0	0	0	0	0	0	0	0	0	0	0	0	0	0	0	0	0	n	Proteobacteria	1	Alphaproteobacteria	0.99			Rhizobiales	0.99			Methylobacteriaceae	0.29	Microvirga	0.29
Otu1577	0	0	0	0	0	0	0	0	0	0	0	0	0	0	0	0	0	0	0	0	0	0	0	0	0	0	0	0	0	0	n	Actinobacteria	1	Actinobacteria	1	Acidimicrobidae	0.95	Acidimicrobiales	0.95	"Acidimicrobineae"	0.95	Iamiaceae	0.79	Aquihabitans	0.79
Otu1578	0	0	0	0	0	0	0	0	0	0	0	0	0	0	0	0	0	0	0	0	0	0	0	0	0	0	0	0	0	0	n	Acidobacteria	0.87	Acidobacteria_Gp3	0.87									Candidatus Solibacter	0.82
Otu1579	0	0	0	0	0	0	0	0	0	0	0	0	0	0	0	0	0	0	0	0	0	0	0	0	0	0	0	0	0	0	n	Proteobacteria	0.53	Alphaproteobacteria	0.5			Rhizobiales	0.38			Phyllobacteriaceae	0.25	Pseudaminobacter	0.23
Otu158	0	0	0	0	0	0	0	0	0	0	0	0	0	0	0	0	0	0	0	0	0	0	0	0	0	0	0	0	0	0	n	Proteobacteria	1	Betaproteobacteria	1			Burkholderiales	1			Comamonadaceae	1	Comamonas	0.9
Otu1580	0	0	0	0	0	0	0	0	0	0	1	0	0	0	0	0	0	0	0	0	0	0	0	0	0	1.46841e-05	0	0	0	0	n	Proteobacteria	1	Betaproteobacteria	0.99			Burkholderiales	0.98			Comamonadaceae	0.48	Ramlibacter	0.14
Otu1581	0	0	0	0	0	0	0	0	0	0	0	0	0	0	0	0	0	0	0	0	0	0	0	0	0	0	0	0	0	0	n	Proteobacteria	0.94	Alphaproteobacteria	0.83			Sphingomonadales	0.31			Sphingomonadaceae	0.31	Parablastomonas	0.21
Otu1582	0	0	0	0	0	0	0	0	0	0	0	0	0	0	0	0	0	0	0	0	0	0	0	0	0	0	0	0	0	0	n	Actinobacteria	0.84	Actinobacteria	0.84	Actinobacteridae	0.84	Actinomycetales	0.84	Frankineae	0.76	Cryptosporangiaceae	0.76	Cryptosporangium	0.75
Otu1583	0	0	0	0	0	0	0	0	0	0	0	0	0	0	0	0	0	0	0	0	0	0	0	0	0	0	0	0	0	0	n	Proteobacteria	1	Betaproteobacteria	0.87			Burkholderiales	0.64			Comamonadaceae	0.34	Lampropedia	0.31
Otu1584	0	0	0	0	0	0	0	0	0	0	0	0	0	0	0	0	0	0	0	0	0	0	0	0	0	0	0	0	0	0	n	Gemmatimonadetes	0.95	Gemmatimonadetes	0.95			Gemmatimonadales	0.95			Gemmatimonadaceae	0.95	Gemmatimonas	0.95
Otu1585	0	0	0	0	0	0	0	0	0	0	0	0	0	0	0	0	0	0	0	0	0	0	0	0	0	0	0	0	0	0	n	Proteobacteria	1	Alphaproteobacteria	1			Rhizobiales	1			Beijerinckiaceae	0.61	Methylocella	0.53
Otu1586	0	0	0	0	0	0	0	0	0	0	0	0	0	0	0	0	0	0	0	0	0	0	0	0	0	0	0	0	0	0	n	Proteobacteria	0.95	Alphaproteobacteria	0.93			Rhodospirillales	0.46			Rhodospirillaceae	0.46	Lacibacterium	0.33
Otu1587	0	0	0	0	0	0	0	0	0	0	0	0	0	0	0	0	0	0	0	0	0	0	0	0	0	0	0	0	0	0	n	Actinobacteria	0.91	Actinobacteria	0.91	Actinobacteridae	0.87	Actinomycetales	0.86	Streptomycineae	0.52	Streptomycetaceae	0.52	Streptacidiphilus	0.34
Otu1588	0	0	0	0	0	0	0	0	0	0	0	0	0	0	0	0	0	0	0	0	0	0	0	0	0	0	0	0	0	0	n	Proteobacteria	0.57	Betaproteobacteria	0.45			Burkholderiales	0.44			Oxalobacteraceae	0.19	Rugamonas	0.17
Otu1589	0	0	0	0	0	0	0	0	0	1	0	0	0	0	0	0	0	0	0	0	0	0	0	0	2.0014e-05	0	0	0	0	0	n	Chloroflexi	0.82	Thermomicrobia	0.26			Thermomicrobiales	0.19			Thermomicrobiaceae	0.19	Thermorudis	0.19
Otu159	0	0	0	0	0	0	0	0	0	0	0	0	0	0	0	0	0	0	0	0	0	0	0	0	0	0	0	0	0	0	n	Acidobacteria	1	Acidobacteria_Gp1	1									Telmatobacter	0.61
Otu1590	0	0	0	0	0	0	0	0	0	0	0	0	0	0	0	0	0	0	0	0	0	0	0	0	0	0	0	0	0	0	n	Proteobacteria	1	Alphaproteobacteria	1			Rhizobiales	0.99			Bradyrhizobiaceae	0.94	Oligotropha	0.66
Otu1591	0	0	0	0	0	0	0	0	0	0	0	0	0	0	0	0	0	0	0	0	0	0	0	0	0	0	0	0	0	0	n	Proteobacteria	1	Alphaproteobacteria	1			Rhizobiales	1			Methylobacteriaceae	0.96	Microvirga	0.96
Otu1592	0	0	0	0	0	0	0	0	0	0	0	0	0	0	0	0	0	0	0	0	0	0	0	0	0	0	0	0	0	0	n	Proteobacteria	0.99	Betaproteobacteria	0.7			Burkholderiales	0.65			Burkholderiaceae	0.47	Pandoraea	0.37
Otu1593	0	0	0	0	0	0	0	0	0	0	0	0	0	0	0	0	0	0	0	0	0	0	0	0	0	0	0	0	0	0	n	Proteobacteria	1	Betaproteobacteria	1			Burkholderiales	0.77			Oxalobacteraceae	0.69	Undibacterium	0.45
Otu1594	0	0	0	0	0	0	0	0	0	0	0	0	0	0	0	0	0	0	0	0	0	0	0	0	0	0	0	0	0	0	n	Acidobacteria	0.36	Acidobacteria_Gp3	0.33									Candidatus Solibacter	0.3
Otu1595	0	0	0	0	0	0	0	0	0	0	0	0	0	0	0	0	0	0	0	0	0	0	0	0	0	0	0	0	0	0	n	Proteobacteria	0.98	Alphaproteobacteria	0.73			Rhizobiales	0.69			Hyphomicrobiaceae	0.59	Cucumibacter	0.53
Otu1596	0	0	0	0	0	0	0	0	0	0	0	0	0	0	0	0	0	0	0	0	0	0	0	0	0	0	0	0	0	0	n	Bacteroidetes	0.83	Cytophagia	0.83			Cytophagales	0.83			Cytophagaceae	0.83	Sporocytophaga	0.83
Otu1597	0	0	0	0	0	0	0	0	0	0	0	0	0	0	0	0	0	0	0	0	0	0	0	0	0	0	0	0	0	0	n	Proteobacteria	1	Betaproteobacteria	1			Burkholderiales	1			Oxalobacteraceae	0.97	Telluria	0.93
Otu1598	0	0	0	0	0	0	0	0	0	0	0	0	0	0	0	0	0	0	0	0	0	0	0	0	0	0	0	0	0	0	n	Proteobacteria	0.99	Alphaproteobacteria	0.91			Rhizobiales	0.76			Rhizobiales_incertae_sedis	0.46	Hartmannibacter	0.46
Otu1599	0	0	0	0	0	0	0	0	0	0	0	0	0	0	0	0	0	0	0	0	0	0	0	0	0	0	0	0	0	0	n	Actinobacteria	0.81	Thermoleophilia	0.47			Thermoleophilales	0.47			Thermoleophilaceae	0.47	Thermoleophilum	0.47
Otu160	0	30	0	0	0	221	42	279	163	0	21	2	21	13	1	0	0.00126898	0	0	0	0.00942391	0.00109942	0.00716616	0.00405917	0	0.000308366	4.73934e-05	0.000396331	0.000226323	1.76975e-05	n	Proteobacteria	1	Alphaproteobacteria	1			Rhizobiales	1			Rhizobiaceae	1	Rhizobium	1
Otu1600	0	0	0	0	0	0	0	0	0	0	0	0	0	0	0	0	0	0	0	0	0	0	0	0	0	0	0	0	0	0	n	Proteobacteria	0.97	Gammaproteobacteria	0.83			Legionellales	0.43			Coxiellaceae	0.43	Coxiella	0.34
Otu1601	0	0	0	0	0	0	0	0	0	0	0	0	0	0	0	0	0	0	0	0	0	0	0	0	0	0	0	0	0	0	n	Proteobacteria	1	Betaproteobacteria	0.87			Burkholderiales	0.78			Oxalobacteraceae	0.64	Rugamonas	0.29
Otu1602	0	0	0	0	0	0	0	0	0	0	0	0	0	0	0	0	0	0	0	0	0	0	0	0	0	0	0	0	0	0	n	Proteobacteria	0.96	Alphaproteobacteria	0.73			Rhizobiales	0.63			Hyphomicrobiaceae	0.45	Aquabacter	0.41
Otu1603	0	0	0	0	0	0	0	0	0	0	0	0	0	0	0	0	0	0	0	0	0	0	0	0	0	0	0	0	0	0	n	Armatimonadetes	1	Armatimonadia	1			Armatimonadales	1			Armatimonadaceae	1	Armatimonas/Armatimonadetes_gp1	1
Otu1604	0	0	0	0	0	0	0	0	0	0	0	0	0	0	0	0	0	0	0	0	0	0	0	0	0	0	0	0	0	0	n	Proteobacteria	1	Betaproteobacteria	0.6			Burkholderiales	0.4			Sutterellaceae	0.21	Parasutterella	0.2
Otu1605	0	0	0	0	0	0	0	0	0	0	0	0	0	0	0	0	0	0	0	0	0	0	0	0	0	0	0	0	0	0	n	Proteobacteria	1	Alphaproteobacteria	1			Rhodospirillales	0.66			Acetobacteraceae	0.66	Rhodopila	0.63
Otu1606	0	0	0	0	0	0	0	0	0	0	0	0	0	0	0	0	0	0	0	0	0	0	0	0	0	0	0	0	0	0	n	Proteobacteria	0.95	Alphaproteobacteria	0.94			Rhizobiales	0.87			Rhizobiales_incertae_sedis	0.61	Variibacter	0.58
Otu1607	0	0	0	0	0	0	0	0	0	0	0	0	0	0	0	0	0	0	0	0	0	0	0	0	0	0	0	0	0	0	n	Proteobacteria	1	Alphaproteobacteria	0.9			Sphingomonadales	0.72			Erythrobacteraceae	0.32	Erythromicrobium	0.12
Otu1608	0	0	0	0	0	0	0	0	0	0	1	0	0	0	4	0	0	0	0	0	0	0	0	0	0	1.46841e-05	0	0	0	7.07902e-05	n	Actinobacteria	0.94	Actinobacteria	0.94	Actinobacteridae	0.94	Actinomycetales	0.94	Micrococcineae	0.94	Microbacteriaceae	0.92	Chryseoglobus	0.55
Otu1609	0	0	0	0	0	0	0	0	0	0	0	0	0	0	0	0	0	0	0	0	0	0	0	0	0	0	0	0	0	0	n	Proteobacteria	1	Betaproteobacteria	0.53			Burkholderiales	0.52			Burkholderiaceae	0.24	Paucimonas	0.19
Otu161	0	0	0	0	0	0	0	0	0	0	0	0	0	0	0	0	0	0	0	0	0	0	0	0	0	0	0	0	0	0	n	Proteobacteria	1	Alphaproteobacteria	1			Rhizobiales	1			Hyphomicrobiaceae	1	Devosia	1
Otu1610	0	0	0	0	0	0	0	0	0	0	0	0	0	0	0	0	0	0	0	0	0	0	0	0	0	0	0	0	0	0	n	Firmicutes	1	Bacilli	1			Bacillales	1			Alicyclobacillaceae	1	Tumebacillus	0.96
Otu1611	0	0	0	0	0	0	0	0	0	0	0	0	0	0	0	0	0	0	0	0	0	0	0	0	0	0	0	0	0	0	n	Proteobacteria	0.97	Betaproteobacteria	0.97			Nitrosomonadales	0.56			Nitrosomonadaceae	0.56	Nitrosospira	0.56
Otu1612	0	0	0	0	0	0	0	0	0	0	0	0	0	1	0	0	0	0	0	0	0	0	0	0	0	0	0	0	1.74095e-05	0	n	Proteobacteria	1	Betaproteobacteria	1			Burkholderiales	1			Oxalobacteraceae	1	Noviherbaspirillum	0.58
Otu1613	0	0	0	0	0	0	0	0	0	0	0	0	0	0	0	0	0	0	0	0	0	0	0	0	0	0	0	0	0	0	n	Proteobacteria	0.84	Alphaproteobacteria	0.53			Sphingomonadales	0.49			Sphingomonadaceae	0.48	Sandaracinobacter	0.48
Otu1614	0	0	0	0	0	0	0	0	0	0	0	0	0	0	0	0	0	0	0	0	0	0	0	0	0	0	0	0	0	0	n	Proteobacteria	0.97	Deltaproteobacteria	0.91			Myxococcales	0.88	Sorangiineae	0.42	Phaselicystidaceae	0.24	Phaselicystis	0.24
Otu1615	0	0	0	0	0	0	0	0	0	0	0	0	0	0	0	0	0	0	0	0	0	0	0	0	0	0	0	0	0	0	n	Proteobacteria	1	Alphaproteobacteria	1			Rhizobiales	0.76			Bradyrhizobiaceae	0.57	Tardiphaga	0.35
Otu1616	0	0	0	0	0	0	0	0	0	0	0	0	0	0	0	0	0	0	0	0	0	0	0	0	0	0	0	0	0	0	n	Chloroflexi	0.64	Dehalococcoidia	0.43			Dehalococcoidales	0.43			Dehalococcoidaceae	0.43	Dehalococcoides	0.43
Otu1617	0	0	0	0	0	0	0	0	0	0	0	0	0	0	0	0	0	0	0	0	0	0	0	0	0	0	0	0	0	0	n	Chloroflexi	0.7	Thermoflexia	0.29			Thermoflexales	0.29			Thermoflexaceae	0.29	Thermoflexus	0.29
Otu1618	0	0	0	0	0	0	0	0	0	0	0	0	0	0	0	0	0	0	0	0	0	0	0	0	0	0	0	0	0	0	n	Proteobacteria	1	Alphaproteobacteria	0.98			Rhizobiales	0.98			Xanthobacteraceae	0.32	Pseudolabrys	0.32
Otu1619	0	0	0	0	0	3	6	6	0	0	0	0	0	0	0	0	0	0	0	0	0.000127926	0.00015706	0.000154111	0	0	0	0	0	0	0	n	Bacteroidetes	1	Flavobacteriia	1			"Flavobacteriales"	1			Flavobacteriaceae	1	Flavobacterium	0.95
Otu162	0	0	0	0	0	0	0	1	0	0	0	0	0	0	0	0	0	0	0	0	0	0	2.56852e-05	0	0	0	0	0	0	0	n	Proteobacteria	1	Alphaproteobacteria	1			Caulobacterales	0.99			Caulobacteraceae	0.99	Asticcacaulis	0.72
Otu1620	0	0	0	0	0	0	0	0	0	0	0	0	0	0	0	0	0	0	0	0	0	0	0	0	0	0	0	0	0	0	n	Chlamydiae	1	Chlamydiia	1			Chlamydiales	1			Parachlamydiaceae	1	Neochlamydia	0.65
Otu1621	0	0	0	0	0	0	0	0	0	0	0	0	0	0	0	0	0	0	0	0	0	0	0	0	0	0	0	0	0	0	n	Proteobacteria	0.97	Betaproteobacteria	0.68			Burkholderiales	0.35			Oxalobacteraceae	0.22	Pseudoduganella	0.15
Otu1622	0	0	0	0	0	0	0	0	0	0	0	0	0	0	0	0	0	0	0	0	0	0	0	0	0	0	0	0	0	0	n	Proteobacteria	0.86	Betaproteobacteria	0.75			Rhodocyclales	0.42			Rhodocyclaceae	0.42	Methyloversatilis	0.36
Otu1623	0	0	0	0	0	0	0	0	0	0	0	0	0	0	0	0	0	0	0	0	0	0	0	0	0	0	0	0	0	0	n	Verrucomicrobia	1	Spartobacteria	0.71									Spartobacteria_genera_incertae_sedis	0.59
Otu1624	0	0	0	0	0	0	0	0	0	0	0	0	0	0	0	0	0	0	0	0	0	0	0	0	0	0	0	0	0	0	n	Proteobacteria	0.93	Alphaproteobacteria	0.76			Rhizobiales	0.38			Methylobacteriaceae	0.18	Psychroglaciecola	0.08
Otu1625	0	0	0	0	0	0	0	0	0	0	0	0	0	0	0	0	0	0	0	0	0	0	0	0	0	0	0	0	0	0	n	Proteobacteria	0.92	Alphaproteobacteria	0.92			Rhodospirillales	0.91			Acetobacteraceae	0.88	Acidisphaera	0.57
Otu1626	0	0	0	0	0	0	0	0	0	0	0	0	0	0	0	0	0	0	0	0	0	0	0	0	0	0	0	0	0	0	n	Proteobacteria	1	Alphaproteobacteria	1			Rhizobiales	1			Methylocystaceae	1	Methylopila	0.54
Otu1627	0	0	0	0	0	0	0	0	0	0	0	0	0	0	0	0	0	0	0	0	0	0	0	0	0	0	0	0	0	0	n	Proteobacteria	1	Alphaproteobacteria	1			Rhizobiales	0.62			Beijerinckiaceae	0.28	Methyloferula	0.1
Otu1628	0	0	0	0	0	0	0	0	0	0	0	0	0	0	0	0	0	0	0	0	0	0	0	0	0	0	0	0	0	0	n	Proteobacteria	0.9	Alphaproteobacteria	0.66			Rhodospirillales	0.65			Acetobacteraceae	0.6	Rubritepida	0.17
Otu1629	0	0	0	0	0	0	0	0	0	0	0	0	0	0	0	0	0	0	0	0	0	0	0	0	0	0	0	0	0	0	n	Proteobacteria	0.54	Alphaproteobacteria	0.53			Rhizobiales	0.13			Hyphomicrobiaceae	0.09	Ancalomicrobium	0.09
Otu163	0	0	0	0	0	0	0	0	0	0	0	0	0	0	0	0	0	0	0	0	0	0	0	0	0	0	0	0	0	0	n	Actinobacteria	0.97	Actinobacteria	0.97	Rubrobacteridae	0.86	Gaiellales	0.86			Gaiellaceae	0.86	Gaiella	0.86
Otu1630	0	0	0	0	0	0	0	0	0	0	0	0	0	0	0	0	0	0	0	0	0	0	0	0	0	0	0	0	0	0	n	Proteobacteria	1	Alphaproteobacteria	1			Rhodospirillales	1			Acetobacteraceae	1	Roseomonas	1
Otu1631	15	0	0	3	3	12	114	137	53	16	20	3	43	2	59	0.000427083	0	0	7.94913e-05	0.000110343	0.000511705	0.00298414	0.00351887	0.00131985	0.000320224	0.000293681	7.109e-05	0.000811535	3.48189e-05	0.00104416	n	Proteobacteria	1	Betaproteobacteria	1			Burkholderiales	1			Oxalobacteraceae	1	Massilia	0.48
Otu1632	0	0	0	0	0	0	0	0	0	0	0	0	0	0	0	0	0	0	0	0	0	0	0	0	0	0	0	0	0	0	n	Proteobacteria	0.52	Alphaproteobacteria	0.42			Rhizobiales	0.42			"Aurantimonadaceae"	0.17	Jiella	0.17
Otu1633	0	0	0	0	0	0	0	0	0	0	0	0	0	0	0	0	0	0	0	0	0	0	0	0	0	0	0	0	0	0	n	Proteobacteria	1	Alphaproteobacteria	0.91			Sphingomonadales	0.9			Sphingomonadaceae	0.76	Parablastomonas	0.09
Otu1634	10	2	10	14	1	0	0	0	0	0	0	0	0	0	0	0.000284722	8.45988e-05	0.000366139	0.000370959	3.67809e-05	0	0	0	0	0	0	0	0	0	0	n	Proteobacteria	1	Betaproteobacteria	0.87			Burkholderiales	0.78			Oxalobacteraceae	0.68	Pseudoduganella	0.34
Otu1635	0	0	0	0	0	0	0	0	0	0	0	0	0	0	0	0	0	0	0	0	0	0	0	0	0	0	0	0	0	0	n	Acidobacteria	0.99	Acidobacteria_Gp3	0.99									Bryobacter	0.83
Otu1636	0	0	0	0	0	0	0	0	0	0	0	0	0	0	0	0	0	0	0	0	0	0	0	0	0	0	0	0	0	0	n	Acidobacteria	0.66	Acidobacteria_Gp3	0.66									Candidatus Solibacter	0.65
Otu1637	0	0	0	0	0	0	0	2	6	0	0	0	0	0	0	0	0	0	0	0	0	0	5.13703e-05	0.000149417	0	0	0	0	0	0	n	Proteobacteria	0.99	Alphaproteobacteria	0.98			Rhizobiales	0.35			Rhodobiaceae	0.1	Tepidamorphus	0.1
Otu1638	0	0	0	0	0	0	0	0	0	0	0	0	0	0	0	0	0	0	0	0	0	0	0	0	0	0	0	0	0	0	n	Actinobacteria	0.32	Actinobacteria	0.32	Rubrobacteridae	0.19	Gaiellales	0.18			Gaiellaceae	0.18	Gaiella	0.18
Otu1639	0	0	0	0	0	0	0	0	0	0	0	0	0	0	0	0	0	0	0	0	0	0	0	0	0	0	0	0	0	0	n	Firmicutes	0.43	Bacilli	0.4			Bacillales	0.39			Bacillaceae 1	0.3	Falsibacillus	0.3
Otu164	0	0	0	0	0	0	0	0	0	0	0	0	0	0	0	0	0	0	0	0	0	0	0	0	0	0	0	0	0	0	n	Proteobacteria	1	Alphaproteobacteria	1			Alphaproteobacteria_incertae_sedis	0.97					Rhizomicrobium	0.97
Otu1640	0	0	0	0	0	0	0	0	0	0	0	0	0	0	0	0	0	0	0	0	0	0	0	0	0	0	0	0	0	0	n	Chloroflexi	0.84	Chloroflexia	0.68			Kallotenuales	0.61			Kallotenuaceae	0.61	Kallotenue	0.61
Otu1641	0	0	0	0	0	0	0	0	0	0	0	0	0	0	0	0	0	0	0	0	0	0	0	0	0	0	0	0	0	0	n	Proteobacteria	0.68	Deltaproteobacteria	0.35			Myxococcales	0.27	Cystobacterineae	0.26	Cystobacteraceae	0.19	Anaeromyxobacter	0.1
Otu1642	0	0	0	0	0	0	0	0	0	0	0	0	0	0	0	0	0	0	0	0	0	0	0	0	0	0	0	0	0	0	n	Actinobacteria	0.77	Actinobacteria	0.77	Actinobacteridae	0.77	Actinomycetales	0.77	Micrococcineae	0.77	Microbacteriaceae	0.48	Humibacter	0.39
Otu1643	0	0	0	0	0	0	0	0	0	0	0	0	0	0	0	0	0	0	0	0	0	0	0	0	0	0	0	0	0	0	n	Bacteroidetes	0.79	Flavobacteriia	0.79			"Flavobacteriales"	0.79			Flavobacteriaceae	0.79	Postechiella	0.35
Otu1644	0	0	0	0	0	0	0	0	0	0	0	0	0	0	0	0	0	0	0	0	0	0	0	0	0	0	0	0	0	0	n	Proteobacteria	0.75	Betaproteobacteria	0.65			Rhodocyclales	0.4			Rhodocyclaceae	0.4	Georgfuchsia	0.26
Otu1645	0	0	0	0	0	0	0	0	0	0	0	0	0	0	0	0	0	0	0	0	0	0	0	0	0	0	0	0	0	0	n	Acidobacteria	0.77	Acidobacteria_Gp3	0.66									Bryobacter	0.59
Otu1646	0	0	0	0	0	0	0	0	0	0	0	0	0	0	0	0	0	0	0	0	0	0	0	0	0	0	0	0	0	0	n	Actinobacteria	1	Actinobacteria	1	Actinobacteridae	1	Actinomycetales	1	Frankineae	0.26	Cryptosporangiaceae	0.23	Jatrophihabitans	0.23
Otu1647	0	0	0	0	0	0	0	0	0	0	0	0	0	0	0	0	0	0	0	0	0	0	0	0	0	0	0	0	0	0	n	Actinobacteria	1	Actinobacteria	1	Actinobacteridae	0.87	Actinomycetales	0.87	Frankineae	0.43	Sporichthyaceae	0.3	Sporichthya	0.3
Otu1648	0	0	0	0	0	0	0	0	0	0	0	0	0	0	0	0	0	0	0	0	0	0	0	0	0	0	0	0	0	0	n	Proteobacteria	0.94	Gammaproteobacteria	0.59			Pseudomonadales	0.41			Moraxellaceae	0.29	Perlucidibaca	0.28
Otu1649	0	0	0	0	0	0	0	0	0	0	0	0	0	0	0	0	0	0	0	0	0	0	0	0	0	0	0	0	0	0	n	Proteobacteria	0.7	Deltaproteobacteria	0.61			Myxococcales	0.56	Cystobacterineae	0.56	Vulgatibacteraceae	0.27	Vulgatibacter	0.27
Otu165	0	0	0	0	0	3	0	0	0	1	2	3	8	43	16	0	0	0	0	0	0.000127926	0	0	0	2.0014e-05	2.93681e-05	7.109e-05	0.000150983	0.000748607	0.000283161	n	Firmicutes	1	Bacilli	1			Bacillales	1			Paenibacillaceae 1	1	Paenibacillus	1
Otu1650	0	0	0	0	0	0	0	0	0	0	0	0	0	0	0	0	0	0	0	0	0	0	0	0	0	0	0	0	0	0	n	Proteobacteria	0.99	Deltaproteobacteria	0.58			Myxococcales	0.58	Sorangiineae	0.58	Polyangiaceae	0.58	Sorangium	0.26
Otu1651	0	0	0	0	0	0	0	0	0	0	0	0	0	0	0	0	0	0	0	0	0	0	0	0	0	0	0	0	0	0	n	Bacteroidetes	0.17	Flavobacteriia	0.17			"Flavobacteriales"	0.17			Flavobacteriaceae	0.16	Subsaxibacter	0.09
Otu1652	0	0	0	0	0	0	0	0	0	0	0	0	0	0	0	0	0	0	0	0	0	0	0	0	0	0	0	0	0	0	n	Proteobacteria	0.99	Alphaproteobacteria	0.99			Rhizobiales	0.7			Methylobacteriaceae	0.22	Psychroglaciecola	0.22
Otu1653	0	0	0	0	0	0	0	0	0	0	0	0	0	0	0	0	0	0	0	0	0	0	0	0	0	0	0	0	0	0	n	Proteobacteria	0.95	Alphaproteobacteria	0.75			Rhodospirillales	0.75			Acetobacteraceae	0.73	Paracraurococcus	0.16
Otu1654	0	0	0	0	0	0	0	0	0	0	0	0	0	0	0	0	0	0	0	0	0	0	0	0	0	0	0	0	0	0	n	Bacteroidetes	0.83	Sphingobacteriia	0.39			"Sphingobacteriales"	0.39			Sphingobacteriaceae	0.31	Nubsella	0.07
Otu1655	0	0	0	0	0	0	0	0	0	0	0	0	0	0	0	0	0	0	0	0	0	0	0	0	0	0	0	0	0	0	n	Proteobacteria	0.94	Deltaproteobacteria	0.66			Myxococcales	0.63	Cystobacterineae	0.54	Cystobacteraceae	0.33	Anaeromyxobacter	0.33
Otu1656	0	0	0	0	0	0	0	0	0	0	0	0	0	0	0	0	0	0	0	0	0	0	0	0	0	0	0	0	0	0	n	Proteobacteria	1	Alphaproteobacteria	1			Sphingomonadales	0.91			Sphingomonadaceae	0.5	Parablastomonas	0.26
Otu1657	0	0	0	0	0	0	0	0	0	0	0	0	0	0	0	0	0	0	0	0	0	0	0	0	0	0	0	0	0	0	n	Chlamydiae	0.42	Chlamydiia	0.42			Chlamydiales	0.42			Parachlamydiaceae	0.42	Neochlamydia	0.29
Otu1658	0	0	0	0	0	0	0	0	0	0	0	0	0	0	0	0	0	0	0	0	0	0	0	0	0	0	0	0	0	0	n	Bacteroidetes	0.98	Cytophagia	0.55			Cytophagales	0.55					Chryseolinea	0.33
Otu1659	0	0	0	0	0	0	0	0	0	0	0	0	0	0	0	0	0	0	0	0	0	0	0	0	0	0	0	0	0	0	n	Proteobacteria	0.68	Alphaproteobacteria	0.44			Alphaproteobacteria_incertae_sedis	0.4					Rhizomicrobium	0.4
Otu166	0	0	5	0	0	4	3	1	0	2	447	155	106	151	124	0	0	0.00018307	0	0	0.000170568	7.85299e-05	2.56852e-05	0	4.0028e-05	0.00656378	0.00367299	0.00200053	0.00262883	0.0021945	n	Proteobacteria	1	Betaproteobacteria	1			Burkholderiales	0.99			Burkholderiaceae	0.99	Burkholderia	0.76
Otu1660	0	0	0	0	0	0	0	0	0	0	0	0	0	0	0	0	0	0	0	0	0	0	0	0	0	0	0	0	0	0	n	Proteobacteria	0.62	Alphaproteobacteria	0.24			Magnetococcales	0.07			Magnetococcaceae	0.07	Magnetococcus	0.07
Otu1661	0	0	0	0	0	0	0	0	0	0	0	0	0	0	0	0	0	0	0	0	0	0	0	0	0	0	0	0	0	0	n	Proteobacteria	0.54	Gammaproteobacteria	0.2			Acidithiobacillales	0.16			Thermithiobacillaceae	0.16	Thermithiobacillus	0.16
Otu1662	0	0	0	0	0	0	0	0	0	0	0	0	0	0	0	0	0	0	0	0	0	0	0	0	0	0	0	0	0	0	n	Proteobacteria	0.71	Alphaproteobacteria	0.58			Rhizobiales	0.23			Rhizobiales_incertae_sedis	0.15	Phreatobacter	0.15
Otu1663	0	0	0	0	0	0	0	0	0	0	0	0	0	0	0	0	0	0	0	0	0	0	0	0	0	0	0	0	0	0	n	Proteobacteria	1	Betaproteobacteria	0.92			Burkholderiales	0.68			Burkholderiales_incertae_sedis	0.49	Ideonella	0.34
Otu1664	0	0	0	0	0	0	0	0	0	0	0	0	0	0	0	0	0	0	0	0	0	0	0	0	0	0	0	0	0	0	n	Acidobacteria	0.5	Acidobacteria_Gp3	0.48									Paludibaculum	0.2
Otu1665	0	0	0	0	0	0	0	0	0	0	0	0	0	0	0	0	0	0	0	0	0	0	0	0	0	0	0	0	0	0	n	Proteobacteria	1	Deltaproteobacteria	1			Bdellovibrionales	0.99			Bdellovibrionaceae	0.99	Bdellovibrio	0.99
Otu1666	0	0	0	0	0	1	0	0	0	0	0	0	0	0	0	0	0	0	0	0	4.26421e-05	0	0	0	0	0	0	0	0	0	n	Proteobacteria	1	Betaproteobacteria	0.95			Burkholderiales	0.85			Burkholderiaceae	0.22	Paucimonas	0.2
Otu1667	0	0	0	0	0	0	0	0	0	0	0	0	0	0	0	0	0	0	0	0	0	0	0	0	0	0	0	0	0	0	n	Acidobacteria	1	Acidobacteria_Gp3	0.98									Candidatus Solibacter	0.79
Otu1668	0	0	0	0	0	0	0	0	0	0	0	0	0	0	0	0	0	0	0	0	0	0	0	0	0	0	0	0	0	0	n	Gemmatimonadetes	0.68	Gemmatimonadetes	0.68			Gemmatimonadales	0.68			Gemmatimonadaceae	0.68	Gemmatimonas	0.68
Otu1669	0	0	0	0	0	0	0	0	0	0	0	0	0	0	0	0	0	0	0	0	0	0	0	0	0	0	0	0	0	0	n	Actinobacteria	0.67	Actinobacteria	0.64	Rubrobacteridae	0.64	Solirubrobacterales	0.63			Conexibacteraceae	0.36	Conexibacter	0.36
Otu167	0	0	0	0	0	0	0	0	0	0	0	0	0	0	0	0	0	0	0	0	0	0	0	0	0	0	0	0	0	0	n	Acidobacteria	1	Acidobacteria_Gp2	0.99									Gp2	0.99
Otu1670	0	0	0	0	0	0	0	0	0	0	0	0	0	0	0	0	0	0	0	0	0	0	0	0	0	0	0	0	0	0	n	Proteobacteria	0.63	Betaproteobacteria	0.59			Ferrovales	0.31			Ferrovaceae	0.31	Ferrovum	0.31
Otu1671	0	0	0	0	0	0	0	0	0	0	0	0	0	0	0	0	0	0	0	0	0	0	0	0	0	0	0	0	0	0	n	Proteobacteria	1	Betaproteobacteria	0.86			Burkholderiales	0.86			Oxalobacteraceae	0.8	Paraherbaspirillum	0.29
Otu1672	0	0	0	0	0	0	0	0	0	0	0	0	0	0	0	0	0	0	0	0	0	0	0	0	0	0	0	0	0	0	n	Proteobacteria	0.87	Alphaproteobacteria	0.76			Rhizobiales	0.72			Xanthobacteraceae	0.3	Pseudolabrys	0.3
Otu1673	0	0	0	0	0	0	0	0	0	0	0	0	0	0	0	0	0	0	0	0	0	0	0	0	0	0	0	0	0	0	n	Proteobacteria	0.86	Betaproteobacteria	0.86			Burkholderiales	0.83			Oxalobacteraceae	0.79	Pseudoduganella	0.75
Otu1674	0	0	0	0	0	0	0	0	0	0	0	0	0	0	0	0	0	0	0	0	0	0	0	0	0	0	0	0	0	0	n	Proteobacteria	0.92	Alphaproteobacteria	0.87			Sphingomonadales	0.61			Sphingomonadaceae	0.4	Rhizorhabdus	0.36
Otu1675	0	0	0	0	0	0	0	0	0	0	0	0	0	0	0	0	0	0	0	0	0	0	0	0	0	0	0	0	0	0	n	Proteobacteria	0.46	Alphaproteobacteria	0.45			Rhizobiales	0.45			Beijerinckiaceae	0.42	Methyloferula	0.2
Otu1676	0	0	0	0	0	0	0	0	0	0	0	0	0	0	0	0	0	0	0	0	0	0	0	0	0	0	0	0	0	0	n	Proteobacteria	0.98	Gammaproteobacteria	0.98			Pseudomonadales	0.78			Pseudomonadaceae	0.7	Serpens	0.28
Otu1677	0	0	0	0	0	0	0	0	0	0	0	0	0	0	0	0	0	0	0	0	0	0	0	0	0	0	0	0	0	0	n	Proteobacteria	0.57	Alphaproteobacteria	0.56			Rhizobiales	0.55			Rhizobiales_incertae_sedis	0.3	Variibacter	0.29
Otu1678	0	0	0	0	0	0	0	0	0	0	0	0	0	0	0	0	0	0	0	0	0	0	0	0	0	0	0	0	0	0	n	Actinobacteria	0.85	Actinobacteria	0.82	Rubrobacteridae	0.62	Gaiellales	0.48			Gaiellaceae	0.48	Gaiella	0.48
Otu1679	0	0	0	0	0	0	0	0	0	0	0	0	0	0	0	0	0	0	0	0	0	0	0	0	0	0	0	0	0	0	n	Actinobacteria	0.99	Actinobacteria	0.99	Actinobacteridae	0.85	Actinomycetales	0.85	Micromonosporineae	0.25	Micromonosporaceae	0.25	Allocatelliglobosispora	0.22
Otu168	0	0	0	0	0	0	0	0	0	0	0	0	0	0	0	0	0	0	0	0	0	0	0	0	0	0	0	0	0	0	n	Gemmatimonadetes	0.7	Gemmatimonadetes	0.7			Gemmatimonadales	0.7			Gemmatimonadaceae	0.7	Gemmatimonas	0.7
Otu1680	0	0	0	0	0	0	0	0	0	0	0	0	0	0	0	0	0	0	0	0	0	0	0	0	0	0	0	0	0	0	n	Proteobacteria	1	Betaproteobacteria	0.33			Burkholderiales	0.3			Comamonadaceae	0.19	Kinneretia	0.17
Otu1681	0	0	0	0	0	0	0	0	0	0	0	0	0	0	0	0	0	0	0	0	0	0	0	0	0	0	0	0	0	0	n	Proteobacteria	0.99	Gammaproteobacteria	0.87			Legionellales	0.55			Coxiellaceae	0.55	Diplorickettsia	0.46
Otu1682	0	0	0	0	0	0	0	0	0	0	0	0	0	0	0	0	0	0	0	0	0	0	0	0	0	0	0	0	0	0	n	Gemmatimonadetes	1	Gemmatimonadetes	1			Gemmatimonadales	1			Gemmatimonadaceae	1	Gemmatimonas	1
Otu1683	0	0	0	0	0	0	0	0	0	0	0	0	0	0	0	0	0	0	0	0	0	0	0	0	0	0	0	0	0	0	n	Proteobacteria	1	Betaproteobacteria	1			Burkholderiales	0.51			Burkholderiales_incertae_sedis	0.29	Thiomonas	0.22
Otu1684	0	0	0	0	0	0	0	0	0	0	0	0	0	0	0	0	0	0	0	0	0	0	0	0	0	0	0	0	0	0	n	Actinobacteria	1	Actinobacteria	1	Actinobacteridae	1	Actinomycetales	1	Micrococcineae	0.28	Micrococcaceae	0.26	Auritidibacter	0.18
Otu1685	0	0	0	0	0	1	0	0	0	0	0	0	0	0	0	0	0	0	0	0	4.26421e-05	0	0	0	0	0	0	0	0	0	n	Actinobacteria	1	Actinobacteria	1	Actinobacteridae	1	Actinomycetales	1	Corynebacterineae	1	Corynebacteriaceae	1	Corynebacterium	1
Otu1686	0	0	27	0	0	0	3	0	0	0	0	0	0	0	0	0	0	0.000988576	0	0	0	7.85299e-05	0	0	0	0	0	0	0	0	n	Proteobacteria	1	Alphaproteobacteria	1			Caulobacterales	1			Caulobacteraceae	1	Brevundimonas	1
Otu1687	0	0	0	0	0	0	0	0	0	0	0	0	0	0	0	0	0	0	0	0	0	0	0	0	0	0	0	0	0	0	n	Proteobacteria	0.56	Gammaproteobacteria	0.42			Xanthomonadales	0.37			Sinobacteraceae	0.37	Povalibacter	0.34
Otu1688	0	0	0	0	0	0	0	0	0	0	0	0	0	0	0	0	0	0	0	0	0	0	0	0	0	0	0	0	0	0	n	Chloroflexi	0.59	Ardenticatenia	0.1			Ardenticatenales	0.1			Ardenticatenaceae	0.1	Ardenticatena	0.1
Otu1689	0	0	0	0	0	0	0	0	0	0	0	0	0	0	0	0	0	0	0	0	0	0	0	0	0	0	0	0	0	0	n	Proteobacteria	0.74	Gammaproteobacteria	0.33			Pasteurellales	0.08			Pasteurellaceae	0.08	Chelonobacter	0.06
Otu169	0	0	0	0	0	0	0	0	0	0	0	0	0	0	0	0	0	0	0	0	0	0	0	0	0	0	0	0	0	0	n	Acidobacteria	1	Acidobacteria_Gp3	1									Candidatus Solibacter	0.95
Otu1690	0	0	0	0	0	0	0	0	0	0	0	0	0	0	0	0	0	0	0	0	0	0	0	0	0	0	0	0	0	0	n	Proteobacteria	0.87	Alphaproteobacteria	0.7			Rhizobiales	0.51			Xanthobacteraceae	0.2	Pseudolabrys	0.2
Otu1691	0	0	0	0	0	0	0	0	0	0	0	0	0	0	0	0	0	0	0	0	0	0	0	0	0	0	0	0	0	0	n	Planctomycetes	1	Planctomycetia	1			Planctomycetales	1			Planctomycetaceae	1	Zavarzinella	0.39
Otu1692	0	0	0	0	0	0	0	0	0	0	0	0	0	0	0	0	0	0	0	0	0	0	0	0	0	0	0	0	0	0	n	Proteobacteria	0.94	Betaproteobacteria	0.94			Burkholderiales	0.94			Burkholderiales_incertae_sedis	0.2	Xylophilus	0.19
Otu1693	0	0	0	0	0	0	1	0	0	0	4	2	0	1	7	0	0	0	0	0	0	2.61766e-05	0	0	0	5.87363e-05	4.73934e-05	0	1.74095e-05	0.000123883	n	Proteobacteria	1	Gammaproteobacteria	1			Xanthomonadales	1			Xanthomonadaceae	1	Fulvimonas	0.54
Otu1694	0	0	0	0	0	0	0	0	0	0	0	0	0	0	0	0	0	0	0	0	0	0	0	0	0	0	0	0	0	0	n	Acidobacteria	0.89	Acidobacteria_Gp3	0.89									Candidatus Solibacter	0.89
Otu1695	0	0	0	0	0	0	0	0	0	0	0	0	0	0	0	0	0	0	0	0	0	0	0	0	0	0	0	0	0	0	n	Bacteroidetes	0.56	Sphingobacteriia	0.34			"Sphingobacteriales"	0.34			Sphingobacteriaceae	0.31	Pseudosphingobacterium	0.12
Otu1696	0	0	0	0	0	0	0	0	0	0	0	0	0	0	0	0	0	0	0	0	0	0	0	0	0	0	0	0	0	0	n	Proteobacteria	1	Betaproteobacteria	1			Burkholderiales	0.72			Oxalobacteraceae	0.23	Pseudoduganella	0.12
Otu1697	0	0	0	0	0	0	0	0	0	0	0	0	0	0	0	0	0	0	0	0	0	0	0	0	0	0	0	0	0	0	n	Acidobacteria	0.9	Acidobacteria_Gp3	0.9									Candidatus Solibacter	0.9
Otu1698	0	0	0	0	0	0	0	0	0	0	0	0	0	0	0	0	0	0	0	0	0	0	0	0	0	0	0	0	0	0	n	Proteobacteria	1	Alphaproteobacteria	1			Rhizobiales	0.96			Rhizobiaceae	0.75	Neorhizobium	0.54
Otu1699	0	0	0	2	0	0	0	0	0	0	0	0	0	0	0	0	0	0	5.29942e-05	0	0	0	0	0	0	0	0	0	0	0	n	Firmicutes	1	Bacilli	1			Bacillales	1			Alicyclobacillaceae	1	Tumebacillus	1
Otu170	0	0	0	0	0	0	0	0	0	0	0	0	0	0	0	0	0	0	0	0	0	0	0	0	0	0	0	0	0	0	n	Proteobacteria	0.98	Alphaproteobacteria	0.98			Rhizobiales	0.98			Rhodobiaceae	0.95	Methyloceanibacter	0.81
Otu1700	0	0	0	0	0	0	0	0	0	0	0	0	0	0	0	0	0	0	0	0	0	0	0	0	0	0	0	0	0	0	n	Verrucomicrobia	1	Subdivision3	1									Subdivision3_genera_incertae_sedis	1
Otu1701	0	0	0	0	0	0	0	0	0	0	0	0	0	0	0	0	0	0	0	0	0	0	0	0	0	0	0	0	0	0	n	Proteobacteria	1	Alphaproteobacteria	1			Rhizobiales	1			Xanthobacteraceae	0.49	Pseudolabrys	0.49
Otu1702	0	0	0	0	0	0	0	0	0	0	0	0	0	0	0	0	0	0	0	0	0	0	0	0	0	0	0	0	0	0	n	Acidobacteria	0.91	Acidobacteria_Gp3	0.91									Candidatus Solibacter	0.91
Otu1703	0	0	0	0	0	0	0	0	0	0	0	0	0	0	0	0	0	0	0	0	0	0	0	0	0	0	0	0	0	0	n	Verrucomicrobia	0.28	Verrucomicrobiae	0.19			Verrucomicrobiales	0.19			Verrucomicrobiaceae	0.19	Verrucomicrobium	0.13
Otu1704	0	0	0	0	0	0	0	0	0	0	0	0	0	0	0	0	0	0	0	0	0	0	0	0	0	0	0	0	0	0	n	Firmicutes	1	Clostridia	1			Clostridiales	1			Clostridiaceae 1	1	Clostridium sensu stricto	1
Otu1705	0	0	1	0	0	0	0	0	0	0	0	0	0	0	0	0	0	3.66139e-05	0	0	0	0	0	0	0	0	0	0	0	0	n	Proteobacteria	0.98	Gammaproteobacteria	0.8			"Enterobacteriales"	0.65			Enterobacteriaceae	0.65	Pragia	0.31
Otu1706	0	0	0	0	0	0	0	0	0	0	0	0	0	0	0	0	0	0	0	0	0	0	0	0	0	0	0	0	0	0	n	Proteobacteria	0.7	Alphaproteobacteria	0.56			Rhizobiales	0.53			Hyphomicrobiaceae	0.37	Aquabacter	0.35
Otu1707	0	0	0	0	0	0	0	0	0	0	0	0	0	0	0	0	0	0	0	0	0	0	0	0	0	0	0	0	0	0	n	Proteobacteria	0.6	Alphaproteobacteria	0.38			Rhizobiales	0.33			Hyphomicrobiaceae	0.33	Pedomicrobium	0.33
Otu1708	0	0	0	0	0	0	0	0	0	0	0	0	0	0	0	0	0	0	0	0	0	0	0	0	0	0	0	0	0	0	n	Bacteroidetes	0.51	Flavobacteriia	0.51			"Flavobacteriales"	0.51			Flavobacteriaceae	0.51	Antarcticimonas	0.29
Otu1709	0	0	0	0	0	0	0	0	0	0	0	0	0	0	0	0	0	0	0	0	0	0	0	0	0	0	0	0	0	0	n	Proteobacteria	0.68	Betaproteobacteria	0.63			Rhodocyclales	0.37			Rhodocyclaceae	0.37	Ferribacterium	0.07
Otu171	0	0	0	0	0	0	0	0	0	0	0	0	0	0	0	0	0	0	0	0	0	0	0	0	0	0	0	0	0	0	n	Proteobacteria	1	Alphaproteobacteria	1			Rhodospirillales	1			Acetobacteraceae	0.99	Rhodopila	0.24
Otu1710	0	0	0	0	0	1	0	4	79	0	23	12	6	5	3	0	0	0	0	0	4.26421e-05	0	0.000102741	0.00196733	0	0.000337734	0.00028436	0.000113237	8.70474e-05	5.30926e-05	n	Proteobacteria	1	Betaproteobacteria	1			Burkholderiales	0.99			Burkholderiaceae	0.99	Burkholderia	0.97
Otu1711	0	0	0	0	0	0	0	0	0	0	0	0	0	0	0	0	0	0	0	0	0	0	0	0	0	0	0	0	0	0	n	Proteobacteria	0.99	Alphaproteobacteria	0.77			Rhizobiales	0.77			Bradyrhizobiaceae	0.75	Tardiphaga	0.72
Otu1712	0	0	0	0	0	0	0	0	0	0	0	0	0	0	0	0	0	0	0	0	0	0	0	0	0	0	0	0	0	0	n	Proteobacteria	0.72	Alphaproteobacteria	0.63			Rhodospirillales	0.6					Reyranella	0.59
Otu1713	0	0	0	0	0	0	0	0	0	0	0	0	0	0	0	0	0	0	0	0	0	0	0	0	0	0	0	0	0	0	n	Bacteroidetes	1	Sphingobacteriia	1			"Sphingobacteriales"	1			Chitinophagaceae	1	Flavihumibacter	0.8
Otu1714	0	0	0	0	0	0	0	0	0	0	0	0	0	0	0	0	0	0	0	0	0	0	0	0	0	0	0	0	0	0	n	Proteobacteria	0.6	Deltaproteobacteria	0.56			Syntrophobacterales	0.36			Syntrophaceae	0.31	Desulfobacca	0.19
Otu1715	0	0	0	0	0	1	0	0	4	0	0	2	0	0	0	0	0	0	0	0	4.26421e-05	0	0	9.96115e-05	0	0	4.73934e-05	0	0	0	n	Firmicutes	1	Bacilli	1			Bacillales	1			Paenibacillaceae 1	1	Paenibacillus	1
Otu1716	0	0	0	0	0	0	0	0	0	0	0	0	0	0	0	0	0	0	0	0	0	0	0	0	0	0	0	0	0	0	n	Bacteroidetes	0.98	Cytophagia	0.37			Cytophagales	0.37					Chryseolinea	0.26
Otu1717	0	0	0	0	0	0	0	0	0	0	0	0	0	0	0	0	0	0	0	0	0	0	0	0	0	0	0	0	0	0	n	Proteobacteria	1	Betaproteobacteria	0.96			Burkholderiales	0.94			Burkholderiales_incertae_sedis	0.71	Aquincola	0.66
Otu1718	0	0	0	0	0	0	0	0	0	0	0	0	0	0	0	0	0	0	0	0	0	0	0	0	0	0	0	0	0	0	n	Actinobacteria	0.86	Actinobacteria	0.86	Rubrobacteridae	0.84	Gaiellales	0.84			Gaiellaceae	0.84	Gaiella	0.84
Otu1719	0	0	0	0	0	0	0	0	0	0	0	0	0	0	0	0	0	0	0	0	0	0	0	0	0	0	0	0	0	0	n	Proteobacteria	0.84	Deltaproteobacteria	0.8			Myxococcales	0.75	Sorangiineae	0.62	Phaselicystidaceae	0.4	Phaselicystis	0.4
Otu172	0	0	0	0	0	0	0	0	0	0	0	0	0	0	0	0	0	0	0	0	0	0	0	0	0	0	0	0	0	0	n	Proteobacteria	1	Alphaproteobacteria	1			Rhizobiales	0.96			Hyphomicrobiaceae	0.41	Rhodoplanes	0.35
Otu1720	0	0	0	0	0	0	0	0	0	0	0	0	0	0	0	0	0	0	0	0	0	0	0	0	0	0	0	0	0	0	n	Proteobacteria	1	Deltaproteobacteria	1			Bdellovibrionales	1			Bacteriovoracaceae	1	Bacteriovorax	0.99
Otu1721	0	0	0	0	0	0	0	0	0	0	0	0	0	0	0	0	0	0	0	0	0	0	0	0	0	0	0	0	0	0	n	Proteobacteria	0.91	Betaproteobacteria	0.83			Burkholderiales	0.82			Burkholderiales_incertae_sedis	0.52	Piscinibacter	0.39
Otu1722	0	0	0	0	0	0	0	0	0	0	0	0	0	0	0	0	0	0	0	0	0	0	0	0	0	0	0	0	0	0	n	Proteobacteria	0.7	Deltaproteobacteria	0.37			Myxococcales	0.15	Nannocystineae	0.06	Nannocystaceae	0.06	Pseudenhygromyxa	0.02
Otu1723	0	0	0	0	0	0	0	0	0	0	0	0	0	0	0	0	0	0	0	0	0	0	0	0	0	0	0	0	0	0	n	Verrucomicrobia	0.68	Subdivision3	0.42									Subdivision3_genera_incertae_sedis	0.41
Otu1724	0	0	0	0	0	0	0	0	0	0	0	0	0	0	0	0	0	0	0	0	0	0	0	0	0	0	0	0	0	0	n	Proteobacteria	0.44	Alphaproteobacteria	0.44			Rhizobiales	0.43			Xanthobacteraceae	0.39	Pseudolabrys	0.39
Otu1725	0	0	0	0	0	0	0	0	0	0	0	2	0	0	0	0	0	0	0	0	0	0	0	0	0	0	4.73934e-05	0	0	0	n	Proteobacteria	0.94	Betaproteobacteria	0.9			Burkholderiales	0.88			Burkholderiaceae	0.6	Paucimonas	0.35
Otu1726	0	0	0	0	0	0	0	0	0	0	0	0	0	0	0	0	0	0	0	0	0	0	0	0	0	0	0	0	0	0	n	Proteobacteria	0.55	Gammaproteobacteria	0.45			Alteromonadales	0.09			Alteromonadales_incertae_sedis	0.09	Pseudoteredinibacter	0.08
Otu1727	0	0	0	0	0	0	0	0	0	0	0	0	0	0	0	0	0	0	0	0	0	0	0	0	0	0	0	0	0	0	n	Proteobacteria	1	Deltaproteobacteria	1			Myxococcales	1	Cystobacterineae	1	Cystobacteraceae	0.4	Melittangium	0.3
Otu1728	0	1	0	0	0	387	111	124	20	0	0	1	0	6	0	0	4.22994e-05	0	0	0	0.0165025	0.00290561	0.00318496	0.000498058	0	0	2.36967e-05	0	0.000104457	0	n	Proteobacteria	1	Betaproteobacteria	1			Burkholderiales	0.99			Oxalobacteraceae	0.85	Telluria	0.29
Otu1729	0	0	0	0	0	0	0	0	0	0	0	0	0	0	0	0	0	0	0	0	0	0	0	0	0	0	0	0	0	0	n	Proteobacteria	0.99	Alphaproteobacteria	0.68			Rhizobiales	0.68			Roseiarcaceae	0.25	Roseiarcus	0.25
Otu173	0	0	0	0	0	0	0	0	0	0	0	0	0	0	0	0	0	0	0	0	0	0	0	0	0	0	0	0	0	0	n	Proteobacteria	1	Betaproteobacteria	1			Burkholderiales	0.72			Alcaligenaceae	0.54	Eoetvoesia	0.07
Otu1730	0	0	0	0	0	0	0	0	0	0	0	0	0	0	0	0	0	0	0	0	0	0	0	0	0	0	0	0	0	0	n	Bacteroidetes	1	Cytophagia	1			Cytophagales	1					Ohtaekwangia	0.91
Otu1731	0	0	0	0	0	0	0	0	0	0	0	0	0	0	0	0	0	0	0	0	0	0	0	0	0	0	0	0	0	0	n	Acidobacteria	0.61	Acidobacteria_Gp3	0.54									Candidatus Solibacter	0.31
Otu1732	0	0	0	0	0	0	0	0	0	0	0	0	0	0	0	0	0	0	0	0	0	0	0	0	0	0	0	0	0	0	n	Acidobacteria	0.86	Acidobacteria_Gp1	0.86									Candidatus Koribacter	0.7
Otu1733	0	0	0	0	0	0	0	0	0	0	0	0	0	0	0	0	0	0	0	0	0	0	0	0	0	0	0	0	0	0	n	Proteobacteria	1	Betaproteobacteria	0.99			Burkholderiales	0.86			Oxalobacteraceae	0.78	Telluria	0.22
Otu1734	0	0	0	0	0	0	0	0	0	0	0	0	0	0	0	0	0	0	0	0	0	0	0	0	0	0	0	0	0	0	n	Proteobacteria	0.56	Alphaproteobacteria	0.5			Rhizobiales	0.5			Rhizobiales_incertae_sedis	0.2	Variibacter	0.2
Otu1735	0	0	0	0	0	0	0	0	0	0	0	0	0	0	0	0	0	0	0	0	0	0	0	0	0	0	0	0	0	0	n	Proteobacteria	1	Alphaproteobacteria	1			Rhizobiales	0.79			Rhodobiaceae	0.21	Afifella	0.19
Otu1736	0	0	0	0	0	0	0	0	0	0	0	0	0	0	0	0	0	0	0	0	0	0	0	0	0	0	0	0	0	0	n	Proteobacteria	0.84	Alphaproteobacteria	0.76			Rhodospirillales	0.74					Reyranella	0.7
Otu1737	0	0	0	0	0	0	0	0	0	0	0	0	11	0	8	0	0	0	0	0	0	0	0	0	0	0	0	0.000207602	0	0.00014158	n	Firmicutes	1	Bacilli	0.7			Bacillales	0.69			Paenibacillaceae 1	0.63	Paenibacillus	0.48
Otu1738	0	0	0	0	0	0	0	0	0	0	0	0	0	0	0	0	0	0	0	0	0	0	0	0	0	0	0	0	0	0	n	Proteobacteria	0.94	Gammaproteobacteria	0.73			Pseudomonadales	0.44			Pseudomonadaceae	0.38	Azomonas	0.25
Otu1739	0	0	0	0	0	0	0	0	0	0	0	0	0	0	0	0	0	0	0	0	0	0	0	0	0	0	0	0	0	0	n	Acidobacteria	0.95	Acidobacteria_Gp3	0.95									Candidatus Solibacter	0.95
Otu174	0	0	0	0	0	0	0	0	0	0	11	0	0	0	9	0	0	0	0	0	0	0	0	0	0	0.000161525	0	0	0	0.000159278	n	Proteobacteria	0.95	Gammaproteobacteria	0.78			Chromatiales	0.14			Chromatiaceae	0.14	Chromatium	0.06
Otu1740	0	0	0	0	0	0	0	0	0	0	0	0	0	0	0	0	0	0	0	0	0	0	0	0	0	0	0	0	0	0	n	Firmicutes	1	Clostridia	1			Clostridiales	1			Lachnospiraceae	1	Clostridium XlVa	1
Otu1741	0	0	0	0	0	0	0	0	0	0	0	0	0	0	0	0	0	0	0	0	0	0	0	0	0	0	0	0	0	0	n	Acidobacteria	0.66	Acidobacteria_Gp2	0.49									Gp2	0.49
Otu1742	0	0	0	0	0	0	0	0	0	0	0	0	0	0	3	0	0	0	0	0	0	0	0	0	0	0	0	0	0	5.30926e-05	n	Proteobacteria	1	Betaproteobacteria	0.98			Burkholderiales	0.98			Oxalobacteraceae	0.9	Telluria	0.77
Otu1743	0	0	0	0	0	0	0	0	0	0	0	0	0	0	0	0	0	0	0	0	0	0	0	0	0	0	0	0	0	0	n	Firmicutes	0.99	Clostridia	0.98			Clostridiales	0.98			Clostridiales_Incertae Sedis XI	0.93	Sedimentibacter	0.86
Otu1744	0	0	0	0	0	0	0	0	0	0	0	0	0	0	0	0	0	0	0	0	0	0	0	0	0	0	0	0	0	0	n	Proteobacteria	1	Betaproteobacteria	1			Burkholderiales	1			Oxalobacteraceae	0.99	Duganella	0.47
Otu1745	0	0	0	0	0	0	0	0	0	0	0	0	0	0	0	0	0	0	0	0	0	0	0	0	0	0	0	0	0	0	n	Firmicutes	0.97	Clostridia	0.97			Clostridiales	0.97			Peptococcaceae 1	0.96	Desulfosporosinus	0.95
Otu1746	0	0	0	0	0	0	0	0	0	0	0	0	0	0	0	0	0	0	0	0	0	0	0	0	0	0	0	0	0	0	n	Chloroflexi	0.16	Caldilineae	0.12			Caldilineales	0.12			Caldilineaceae	0.12	Litorilinea	0.12
Otu1747	0	0	0	0	0	0	0	0	0	0	0	0	0	0	0	0	0	0	0	0	0	0	0	0	0	0	0	0	0	0	n	Acidobacteria	0.25	Acidobacteria_Gp3	0.19									Candidatus Solibacter	0.16
Otu1748	0	0	0	0	0	0	0	0	0	0	0	0	0	0	0	0	0	0	0	0	0	0	0	0	0	0	0	0	0	0	n	Chloroflexi	0.65	Ktedonobacteria	0.61			Ktedonobacterales	0.6			Thermosporotrichaceae	0.48	Thermosporothrix	0.48
Otu1749	0	0	0	0	0	0	0	0	0	0	0	0	0	0	0	0	0	0	0	0	0	0	0	0	0	0	0	0	0	0	n	Proteobacteria	0.79	Deltaproteobacteria	0.41			Desulfuromonadales	0.19			Geobacteraceae	0.19	Geothermobacter	0.19
Otu175	0	0	0	0	0	0	0	0	0	0	0	0	0	0	0	0	0	0	0	0	0	0	0	0	0	0	0	0	0	0	n	Actinobacteria	1	Actinobacteria	1	Actinobacteridae	1	Actinomycetales	1	Micrococcineae	0.8	Micrococcaceae	0.7	Kocuria	0.31
Otu1750	0	0	0	0	0	0	0	0	0	0	0	0	0	0	0	0	0	0	0	0	0	0	0	0	0	0	0	0	0	0	n	Proteobacteria	1	Alphaproteobacteria	0.92			Rhizobiales	0.91			Rhizobiales_incertae_sedis	0.47	Phreatobacter	0.46
Otu1751	0	0	0	0	0	0	0	0	0	0	0	0	0	0	0	0	0	0	0	0	0	0	0	0	0	0	0	0	0	0	n	Actinobacteria	0.97	Actinobacteria	0.97	Rubrobacteridae	0.97	Solirubrobacterales	0.96			Conexibacteraceae	0.96	Conexibacter	0.96
Otu1752	0	0	0	0	0	0	0	0	0	0	0	0	0	0	0	0	0	0	0	0	0	0	0	0	0	0	0	0	0	0	n	Proteobacteria	0.9	Betaproteobacteria	0.66			Rhodocyclales	0.31			Rhodocyclaceae	0.31	Uliginosibacterium	0.21
Otu1753	0	0	0	0	0	0	0	0	0	0	0	0	0	0	0	0	0	0	0	0	0	0	0	0	0	0	0	0	0	0	n	Actinobacteria	1	Actinobacteria	1	Actinobacteridae	1	Actinomycetales	1	Micrococcineae	0.64	Cellulomonadaceae	0.52	Oerskovia	0.5
Otu1754	0	0	0	0	0	0	0	0	0	0	0	0	0	0	0	0	0	0	0	0	0	0	0	0	0	0	0	0	0	0	n	Proteobacteria	0.93	Alphaproteobacteria	0.93			Rhizobiales	0.81			Xanthobacteraceae	0.21	Pseudoxanthobacter	0.21
Otu1755	0	0	0	0	0	0	0	0	0	0	0	0	0	0	0	0	0	0	0	0	0	0	0	0	0	0	0	0	0	0	n	Bacteroidetes	0.99	Flavobacteriia	0.99			"Flavobacteriales"	0.99			Flavobacteriaceae	0.99	Olleya	0.16
Otu1756	0	0	0	0	0	0	0	0	0	0	0	0	0	0	0	0	0	0	0	0	0	0	0	0	0	0	0	0	0	0	n	Proteobacteria	0.92	Gammaproteobacteria	0.65			Chromatiales	0.35			Ectothiorhodospiraceae	0.22	Thiogranum	0.22
Otu1757	0	0	0	0	0	0	0	0	0	0	0	0	0	0	0	0	0	0	0	0	0	0	0	0	0	0	0	0	0	0	n	Proteobacteria	1	Deltaproteobacteria	0.88			Myxococcales	0.88			Sandaracinaceae	0.86	Sandaracinus	0.86
Otu1758	0	0	0	0	0	0	0	0	0	0	0	0	0	0	0	0	0	0	0	0	0	0	0	0	0	0	0	0	0	0	n	Planctomycetes	0.77	Phycisphaerae	0.2			Tepidisphaerales	0.15			Tepidisphaeraceae	0.15	Tepidisphaera	0.15
Otu1759	0	0	0	0	0	0	0	0	0	0	0	0	0	0	0	0	0	0	0	0	0	0	0	0	0	0	0	0	0	0	n	Proteobacteria	1	Gammaproteobacteria	0.92			Pseudomonadales	0.92			Pseudomonadaceae	0.92	Rhizobacter	0.92
Otu176	81	0	1	2	1	0	0	0	0	0	0	0	0	0	0	0.00230625	0	3.66139e-05	5.29942e-05	3.67809e-05	0	0	0	0	0	0	0	0	0	0	n	Proteobacteria	1	Alphaproteobacteria	1			Rhodospirillales	1			Acetobacteraceae	1	Roseomonas	1
Otu1760	0	0	0	0	0	0	0	0	0	0	0	0	0	0	0	0	0	0	0	0	0	0	0	0	0	0	0	0	0	0	n	Proteobacteria	0.67	Alphaproteobacteria	0.67			Rhizobiales	0.67			Bradyrhizobiaceae	0.65	Tardiphaga	0.65
Otu1761	0	0	0	0	0	0	0	0	0	0	0	0	0	0	0	0	0	0	0	0	0	0	0	0	0	0	0	0	0	0	n	Acidobacteria	0.86	Acidobacteria_Gp2	0.81									Gp2	0.81
Otu1762	0	0	0	0	0	0	0	0	0	0	0	0	0	0	0	0	0	0	0	0	0	0	0	0	0	0	0	0	0	0	n	Deinococcus-Thermus	0.29	Deinococci	0.29			Deinococcales	0.29			Trueperaceae	0.29	Truepera	0.29
Otu1763	0	0	0	0	0	0	0	0	0	0	0	0	0	0	0	0	0	0	0	0	0	0	0	0	0	0	0	0	0	0	n	Proteobacteria	0.6	Gammaproteobacteria	0.44			Xanthomonadales	0.32			Sinobacteraceae	0.32	Povalibacter	0.32
Otu1764	0	0	0	0	0	0	0	0	0	0	0	0	0	0	0	0	0	0	0	0	0	0	0	0	0	0	0	0	0	0	n	Actinobacteria	1	Actinobacteria	1	Actinobacteridae	1	Actinomycetales	1	Frankineae	0.57	Acidothermaceae	0.5	Acidothermus	0.5
Otu1765	0	0	0	0	0	0	0	0	0	0	0	0	0	0	0	0	0	0	0	0	0	0	0	0	0	0	0	0	0	0	n	Actinobacteria	0.56	Actinobacteria	0.56	Actinobacteridae	0.56	Actinomycetales	0.56	Pseudonocardineae	0.56	Pseudonocardiaceae	0.56	Labedaea	0.55
Otu1766	0	0	0	0	0	0	0	0	0	0	0	0	0	0	0	0	0	0	0	0	0	0	0	0	0	0	0	0	0	0	n	Bacteroidetes	0.65	Cytophagia	0.65			Cytophagales	0.65			Cytophagaceae	0.65	Nibribacter	0.49
Otu1767	0	0	0	0	0	0	0	0	0	0	0	0	0	0	0	0	0	0	0	0	0	0	0	0	0	0	0	0	0	0	n	Proteobacteria	1	Deltaproteobacteria	0.56			Myxococcales	0.56	Sorangiineae	0.56	Labilitrichaceae	0.56	Labilithrix	0.56
Otu1768	0	0	0	0	0	0	0	0	0	0	0	0	0	0	0	0	0	0	0	0	0	0	0	0	0	0	0	0	0	0	n	Proteobacteria	1	Betaproteobacteria	1			Burkholderiales	0.91			Burkholderiales_incertae_sedis	0.44	Mitsuaria	0.17
Otu1769	0	0	0	0	0	0	0	1	0	0	0	0	0	0	2	0	0	0	0	0	0	0	2.56852e-05	0	0	0	0	0	0	3.53951e-05	n	Firmicutes	1	Bacilli	1			Lactobacillales	1			Streptococcaceae	1	Streptococcus	1
Otu177	0	0	0	0	0	0	0	0	0	0	0	0	0	0	0	0	0	0	0	0	0	0	0	0	0	0	0	0	0	0	n	Acidobacteria	1	Acidobacteria_Gp3	0.99									Candidatus Solibacter	0.94
Otu1770	0	0	0	0	0	0	0	0	0	0	0	0	0	0	0	0	0	0	0	0	0	0	0	0	0	0	0	0	0	0	n	Proteobacteria	1	Alphaproteobacteria	0.86			Rhizobiales	0.86			Bradyrhizobiaceae	0.65	Tardiphaga	0.46
Otu1771	0	0	0	0	0	0	0	0	0	0	0	0	0	0	0	0	0	0	0	0	0	0	0	0	0	0	0	0	0	0	n	Proteobacteria	0.96	Betaproteobacteria	0.9			Burkholderiales	0.59			Burkholderiaceae	0.29	Chitinimonas	0.28
Otu1772	0	0	0	0	0	0	0	0	0	0	0	0	0	0	0	0	0	0	0	0	0	0	0	0	0	0	0	0	0	0	n	Proteobacteria	0.9	Betaproteobacteria	0.9			Burkholderiales	0.85			Oxalobacteraceae	0.84	Pseudoduganella	0.77
Otu1773	0	0	0	0	0	0	0	0	0	0	0	0	0	0	0	0	0	0	0	0	0	0	0	0	0	0	0	0	0	0	n	Proteobacteria	0.92	Alphaproteobacteria	0.83			Rhizobiales	0.83			Xanthobacteraceae	0.48	Pseudolabrys	0.48
Otu1774	0	0	0	0	0	0	0	0	0	0	0	0	0	0	0	0	0	0	0	0	0	0	0	0	0	0	0	0	0	0	n	Acidobacteria	1	Acidobacteria_Gp2	0.88									Gp2	0.88
Otu1775	0	0	0	0	0	1	0	0	0	0	0	0	0	0	0	0	0	0	0	0	4.26421e-05	0	0	0	0	0	0	0	0	0	n	Actinobacteria	0.99	Actinobacteria	0.99	Rubrobacteridae	0.99	Solirubrobacterales	0.98			Solirubrobacteraceae	0.9	Solirubrobacter	0.9
Otu1776	0	0	0	0	0	0	0	0	0	0	0	0	0	0	0	0	0	0	0	0	0	0	0	0	0	0	0	0	0	0	n	Proteobacteria	0.99	Betaproteobacteria	0.62			Burkholderiales	0.6			Comamonadaceae	0.34	Alicycliphilus	0.23
Otu1777	0	0	0	0	0	0	0	0	0	0	0	0	0	0	0	0	0	0	0	0	0	0	0	0	0	0	0	0	0	0	n	Proteobacteria	0.99	Gammaproteobacteria	0.76			Xanthomonadales	0.64			Sinobacteraceae	0.64	Povalibacter	0.63
Otu1778	0	0	0	0	0	0	0	0	0	0	0	0	0	0	0	0	0	0	0	0	0	0	0	0	0	0	0	0	0	0	n	Proteobacteria	1	Alphaproteobacteria	1			Sphingomonadales	0.92			Sphingomonadaceae	0.87	Novosphingobium	0.78
Otu1779	0	0	0	0	0	0	0	0	0	0	0	0	0	0	0	0	0	0	0	0	0	0	0	0	0	0	0	0	0	0	n	Deinococcus-Thermus	0.36	Deinococci	0.36			Deinococcales	0.36			Trueperaceae	0.36	Truepera	0.36
Otu178	0	0	0	0	0	0	0	0	0	0	0	0	0	0	0	0	0	0	0	0	0	0	0	0	0	0	0	0	0	0	n	Acidobacteria	1	Acidobacteria_Gp2	1									Gp2	1
Otu1780	0	0	0	0	0	0	0	0	0	0	0	0	0	0	0	0	0	0	0	0	0	0	0	0	0	0	0	0	0	0	n	Actinobacteria	0.36	Actinobacteria	0.36	Rubrobacteridae	0.34	Solirubrobacterales	0.34			Conexibacteraceae	0.33	Conexibacter	0.33
Otu1781	0	0	0	0	0	0	0	0	0	0	0	0	0	0	0	0	0	0	0	0	0	0	0	0	0	0	0	0	0	0	n	Acidobacteria	0.99	Acidobacteria_Gp1	0.61									Candidatus Koribacter	0.28
Otu1782	0	0	0	0	0	43	59	347	238	5	0	0	0	0	0	0	0	0	0	0	0.00183361	0.00154442	0.00891275	0.00592689	0.00010007	0	0	0	0	0	n	Proteobacteria	1	Betaproteobacteria	1			Burkholderiales	1			Oxalobacteraceae	1	Duganella	0.57
Otu1783	0	0	0	0	0	0	0	0	0	0	0	0	0	0	0	0	0	0	0	0	0	0	0	0	0	0	0	0	0	0	n	Acidobacteria	0.64	Acidobacteria_Gp3	0.64									Candidatus Solibacter	0.64
Otu1784	0	0	0	0	0	0	0	0	0	0	0	0	0	0	0	0	0	0	0	0	0	0	0	0	0	0	0	0	0	0	n	Firmicutes	1	Clostridia	1			Clostridiales	1			Ruminococcaceae	1	Clostridium IV	0.88
Otu1785	0	0	0	0	0	0	0	0	0	0	0	0	0	0	0	0	0	0	0	0	0	0	0	0	0	0	0	0	0	0	n	Actinobacteria	0.29	Actinobacteria	0.29	Rubrobacteridae	0.26	Gaiellales	0.26			Gaiellaceae	0.26	Gaiella	0.26
Otu1786	0	0	0	0	0	0	0	0	0	0	0	0	0	0	0	0	0	0	0	0	0	0	0	0	0	0	0	0	0	0	n	Actinobacteria	0.48	Actinobacteria	0.48	Actinobacteridae	0.46	Actinomycetales	0.44	Catenulisporineae	0.29	Actinospicaceae	0.29	Actinospica	0.29
Otu1787	0	0	0	0	0	0	0	0	0	0	0	0	0	0	0	0	0	0	0	0	0	0	0	0	0	0	0	0	0	0	n	Proteobacteria	0.92	Deltaproteobacteria	0.57			Desulfobacterales	0.45			Desulfobulbaceae	0.4	Desulfoprunum	0.18
Otu1788	0	0	0	0	0	0	0	0	0	0	0	0	0	0	0	0	0	0	0	0	0	0	0	0	0	0	0	0	0	0	n	Proteobacteria	0.93	Alphaproteobacteria	0.93			Rhizobiales	0.85			Xanthobacteraceae	0.54	Pseudolabrys	0.54
Otu1789	0	0	0	0	0	0	0	0	0	0	0	0	0	0	0	0	0	0	0	0	0	0	0	0	0	0	0	0	0	0	n	Proteobacteria	0.66	Deltaproteobacteria	0.61			Desulfarculales	0.25			Desulfarculaceae	0.25	Desulfocarbo	0.19
Otu179	0	0	0	0	0	0	0	0	0	0	0	0	0	0	0	0	0	0	0	0	0	0	0	0	0	0	0	0	0	0	n	Proteobacteria	1	Alphaproteobacteria	1			Rhizobiales	1			Methylobacteriaceae	1	Microvirga	1
Otu1790	0	0	0	0	0	0	0	0	0	0	0	0	0	0	0	0	0	0	0	0	0	0	0	0	0	0	0	0	0	0	n	Proteobacteria	0.95	Alphaproteobacteria	0.83			Rhizobiales	0.82			Xanthobacteraceae	0.44	Pseudolabrys	0.44
Otu1791	0	0	0	0	0	0	0	0	0	0	0	0	0	0	0	0	0	0	0	0	0	0	0	0	0	0	0	0	0	0	n	Proteobacteria	1	Betaproteobacteria	0.99			Rhodocyclales	0.61			Rhodocyclaceae	0.61	Georgfuchsia	0.32
Otu1792	0	0	0	0	0	0	0	0	0	0	0	0	0	0	0	0	0	0	0	0	0	0	0	0	0	0	0	0	0	0	n	Proteobacteria	0.96	Betaproteobacteria	0.95			Ferritrophicales	0.25			Ferritrophicaceae	0.25	Ferritrophicum	0.25
Otu1793	0	0	0	0	0	1	1	0	0	0	0	0	0	0	0	0	0	0	0	0	4.26421e-05	2.61766e-05	0	0	0	0	0	0	0	0	n	Proteobacteria	0.91	Betaproteobacteria	0.91			Burkholderiales	0.86			Oxalobacteraceae	0.64	Telluria	0.54
Otu1794	0	0	0	0	0	0	0	0	0	0	0	0	0	0	0	0	0	0	0	0	0	0	0	0	0	0	0	0	0	0	n	Proteobacteria	0.97	Gammaproteobacteria	0.89			Xanthomonadales	0.88			Xanthomonadaceae	0.88	Rudaea	0.49
Otu1795	0	0	0	0	0	0	0	0	0	0	0	0	0	0	0	0	0	0	0	0	0	0	0	0	0	0	0	0	0	0	n	Acidobacteria	0.31	Acidobacteria_Gp1	0.19									Acidipila	0.1
Otu1796	0	0	0	0	0	0	0	0	0	0	0	0	0	0	0	0	0	0	0	0	0	0	0	0	0	0	0	0	0	0	n	Actinobacteria	0.86	Actinobacteria	0.86	Actinobacteridae	0.86	Actinomycetales	0.86	Micrococcineae	0.86	Microbacteriaceae	0.77	Chryseoglobus	0.25
Otu1797	0	0	0	0	0	0	0	0	0	0	0	0	0	0	0	0	0	0	0	0	0	0	0	0	0	0	0	0	0	0	n	Proteobacteria	0.68	Alphaproteobacteria	0.65			Caulobacterales	0.5			Caulobacteraceae	0.42	Phenylobacterium	0.3
Otu1798	0	0	0	0	0	0	0	0	0	0	0	0	0	0	0	0	0	0	0	0	0	0	0	0	0	0	0	0	0	0	n	Acidobacteria	0.97	Acidobacteria_Gp3	0.96									Candidatus Solibacter	0.9
Otu1799	0	0	0	0	0	0	0	0	0	0	0	0	0	0	0	0	0	0	0	0	0	0	0	0	0	0	0	0	0	0	n	Proteobacteria	1	Alphaproteobacteria	1			Rhodospirillales	0.36			Rhodospirillaceae	0.25	Pelagibius	0.2
Otu180	0	0	0	0	0	0	0	8	0	0	0	1	0	0	0	0	0	0	0	0	0	0	0.000205481	0	0	0	2.36967e-05	0	0	0	n	Armatimonadetes	1	Armatimonadia	1			Armatimonadales	1			Armatimonadaceae	1	Armatimonas/Armatimonadetes_gp1	1
Otu1800	0	0	0	0	0	7	0	2	0	0	0	0	0	0	0	0	0	0	0	0	0.000298495	0	5.13703e-05	0	0	0	0	0	0	0	n	Proteobacteria	1	Alphaproteobacteria	1			Rhizobiales	1			Hyphomicrobiaceae	0.98	Devosia	0.98
Otu1801	0	0	0	0	0	0	0	0	0	0	0	0	0	0	0	0	0	0	0	0	0	0	0	0	0	0	0	0	0	0	n	Proteobacteria	0.89	Alphaproteobacteria	0.88			Rhizobiales	0.86			Rhizobiales_incertae_sedis	0.58	Bauldia	0.32
Otu1802	0	0	0	0	0	0	0	0	0	0	0	0	0	0	0	0	0	0	0	0	0	0	0	0	0	0	0	0	0	0	n	Firmicutes	1	Bacilli	0.95			Bacillales	0.95			Alicyclobacillaceae	0.91	Alicyclobacillus	0.9
Otu1803	0	0	0	0	0	0	0	0	0	0	0	0	0	0	0	0	0	0	0	0	0	0	0	0	0	0	0	0	0	0	n	Chloroflexi	0.83	Ktedonobacteria	0.77			Ktedonobacterales	0.69			Ktedonobacteraceae	0.53	Ktedonobacter	0.53
Otu1804	0	0	0	0	0	0	0	0	0	0	0	0	0	0	0	0	0	0	0	0	0	0	0	0	0	0	0	0	0	0	n	Actinobacteria	0.58	Actinobacteria	0.58	Actinobacteridae	0.58	Actinomycetales	0.58	Micromonosporineae	0.57	Micromonosporaceae	0.57	Hamadaea	0.55
Otu1805	0	0	0	0	0	0	0	0	0	0	0	0	0	0	0	0	0	0	0	0	0	0	0	0	0	0	0	0	0	0	n	Proteobacteria	0.78	Deltaproteobacteria	0.72			Myxococcales	0.66	Sorangiineae	0.66	Polyangiaceae	0.66	Minicystis	0.52
Otu1806	0	0	0	0	0	0	0	0	0	0	0	0	0	0	0	0	0	0	0	0	0	0	0	0	0	0	0	0	0	0	n	Acidobacteria	0.75	Acidobacteria_Gp3	0.73									Candidatus Solibacter	0.72
Otu1807	0	0	0	0	0	0	0	0	0	0	0	0	0	0	0	0	0	0	0	0	0	0	0	0	0	0	0	0	0	0	n	Proteobacteria	0.99	Betaproteobacteria	0.65			Rhodocyclales	0.3			Rhodocyclaceae	0.3	Ferribacterium	0.14
Otu1808	0	0	0	0	0	0	0	0	0	0	0	0	0	0	0	0	0	0	0	0	0	0	0	0	0	0	0	0	0	0	n	Proteobacteria	0.79	Gammaproteobacteria	0.38			Chromatiales	0.32			Ectothiorhodospiraceae	0.22	Natronocella	0.1
Otu1809	0	0	0	0	0	0	0	0	0	0	0	0	0	0	0	0	0	0	0	0	0	0	0	0	0	0	0	0	0	0	n	Proteobacteria	0.98	Alphaproteobacteria	0.74			Rhizobiales	0.68			Hyphomicrobiaceae	0.17	Ancalomicrobium	0.15
Otu181	0	0	0	0	0	0	0	0	0	0	0	0	0	0	0	0	0	0	0	0	0	0	0	0	0	0	0	0	0	0	n	Proteobacteria	1	Alphaproteobacteria	1			Rhizobiales	1			Hyphomicrobiaceae	1	Pedomicrobium	1
Otu1810	0	0	0	0	0	0	0	0	0	0	0	0	0	0	0	0	0	0	0	0	0	0	0	0	0	0	0	0	0	0	n	Acidobacteria	0.99	Acidobacteria_Gp2	0.92									Gp2	0.92
Otu1811	0	0	0	0	0	0	0	0	0	0	0	0	0	0	0	0	0	0	0	0	0	0	0	0	0	0	0	0	0	0	n	Proteobacteria	0.84	Gammaproteobacteria	0.77			Xanthomonadales	0.67			Sinobacteraceae	0.67	Panacagrimonas	0.42
Otu1812	0	0	0	0	0	0	0	0	0	0	0	0	0	0	0	0	0	0	0	0	0	0	0	0	0	0	0	0	0	0	n	Proteobacteria	0.94	Deltaproteobacteria	0.54			Myxococcales	0.52	Nannocystineae	0.5	Kofleriaceae	0.23	Kofleria	0.23
Otu1813	0	0	0	0	0	0	0	0	0	0	0	0	0	0	0	0	0	0	0	0	0	0	0	0	0	0	0	0	0	0	n	Proteobacteria	0.93	Alphaproteobacteria	0.91			Rhizobiales	0.6			Hyphomicrobiaceae	0.23	Aquabacter	0.14
Otu1814	0	0	0	0	0	0	0	0	0	0	0	0	0	0	0	0	0	0	0	0	0	0	0	0	0	0	0	0	0	0	n	Proteobacteria	0.95	Alphaproteobacteria	0.87			Rhizobiales	0.8			Xanthobacteraceae	0.37	Pseudolabrys	0.37
Otu1815	0	0	0	0	0	0	0	0	0	0	0	0	0	0	0	0	0	0	0	0	0	0	0	0	0	0	0	0	0	0	n	Proteobacteria	1	Alphaproteobacteria	1			Rhizobiales	1			Bradyrhizobiaceae	0.6	Tardiphaga	0.48
Otu1816	0	0	0	0	0	0	0	0	0	0	0	0	0	0	0	0	0	0	0	0	0	0	0	0	0	0	0	0	0	0	n	Proteobacteria	1	Gammaproteobacteria	0.59			Xanthomonadales	0.46			Sinobacteraceae	0.42	Panacagrimonas	0.24
Otu1817	0	0	0	0	0	0	0	0	0	0	0	0	0	0	0	0	0	0	0	0	0	0	0	0	0	0	0	0	0	0	n	Chlamydiae	1	Chlamydiia	1			Chlamydiales	1			Parachlamydiaceae	1	Parachlamydia	0.78
Otu1818	0	0	0	0	0	0	0	0	0	0	0	0	0	0	0	0	0	0	0	0	0	0	0	0	0	0	0	0	0	0	n	Proteobacteria	0.98	Betaproteobacteria	0.97			Rhodocyclales	0.62			Rhodocyclaceae	0.62	Methyloversatilis	0.27
Otu1819	0	0	0	0	0	0	0	0	0	0	0	0	0	0	0	0	0	0	0	0	0	0	0	0	0	0	0	0	0	0	n	Actinobacteria	0.33	Actinobacteria	0.33	Rubrobacteridae	0.32	Solirubrobacterales	0.32			Conexibacteraceae	0.32	Conexibacter	0.32
Otu182	0	0	0	0	0	0	0	0	0	0	2	0	0	0	0	0	0	0	0	0	0	0	0	0	0	2.93681e-05	0	0	0	0	n	Proteobacteria	1	Alphaproteobacteria	1			Rhodospirillales	0.69			Rhodospirillaceae	0.62	Dongia	0.34
Otu1820	0	0	0	0	0	0	0	0	0	0	0	0	0	0	0	0	0	0	0	0	0	0	0	0	0	0	0	0	0	0	n	Proteobacteria	0.99	Betaproteobacteria	0.6			Burkholderiales	0.55			Burkholderiales_incertae_sedis	0.41	Rivibacter	0.21
Otu1821	0	0	0	0	0	0	0	0	0	0	0	0	0	0	0	0	0	0	0	0	0	0	0	0	0	0	0	0	0	0	n	Proteobacteria	0.98	Betaproteobacteria	0.84			Rhodocyclales	0.55			Rhodocyclaceae	0.55	Ferribacterium	0.05
Otu1822	0	0	0	0	0	0	0	0	0	0	0	0	0	0	0	0	0	0	0	0	0	0	0	0	0	0	0	0	0	0	n	Acidobacteria	0.5	Acidobacteria_Gp1	0.49									Candidatus Koribacter	0.47
Otu1823	0	0	0	0	0	0	0	0	0	0	0	0	0	0	0	0	0	0	0	0	0	0	0	0	0	0	0	0	0	0	n	Proteobacteria	0.98	Alphaproteobacteria	0.89			Sphingomonadales	0.66			Sphingomonadaceae	0.59	Rhizorhabdus	0.43
Otu1824	1	2	3	4	0	1	0	4	0	0	0	0	0	0	0	2.84722e-05	8.45988e-05	0.000109842	0.000105988	0	4.26421e-05	0	0.000102741	0	0	0	0	0	0	0	n	Proteobacteria	1	Betaproteobacteria	0.98			Burkholderiales	0.97			Oxalobacteraceae	0.97	Duganella	0.78
Otu1825	0	0	0	0	0	0	0	0	0	0	0	0	0	0	0	0	0	0	0	0	0	0	0	0	0	0	0	0	0	0	n	Acidobacteria	1	Acidobacteria_Gp3	0.99									Bryobacter	0.68
Otu1826	0	0	0	0	0	0	0	0	0	0	0	0	0	0	0	0	0	0	0	0	0	0	0	0	0	0	0	0	0	0	n	Proteobacteria	0.99	Alphaproteobacteria	0.96			Rhodospirillales	0.83			Acetobacteraceae	0.75	Paracraurococcus	0.14
Otu1827	0	0	0	0	0	0	0	0	0	0	0	0	0	0	0	0	0	0	0	0	0	0	0	0	0	0	0	0	0	0	n	Proteobacteria	0.99	Alphaproteobacteria	0.91			Sphingomonadales	0.49			Sphingomonadaceae	0.45	Sandaracinobacter	0.39
Otu1828	0	0	0	0	0	0	0	0	0	0	0	0	0	0	0	0	0	0	0	0	0	0	0	0	0	0	0	0	0	0	n	Proteobacteria	0.98	Betaproteobacteria	0.98			Burkholderiales	0.94			Oxalobacteraceae	0.86	Duganella	0.66
Otu1829	0	0	0	0	0	0	0	0	0	0	0	0	0	0	0	0	0	0	0	0	0	0	0	0	0	0	0	0	0	0	n	Actinobacteria	0.9	Actinobacteria	0.9	Actinobacteridae	0.9	Actinomycetales	0.9	Streptosporangineae	0.87	Thermomonosporaceae	0.61	Actinoallomurus	0.37
Otu183	39	0	10	5	1	0	3	6	633	0	1224	445	269	176	298	0.00111042	0	0.000366139	0.000132485	3.67809e-05	0	7.85299e-05	0.000154111	0.0157635	0	0.0179733	0.010545	0.00507681	0.00306407	0.00527387	n	Proteobacteria	1	Betaproteobacteria	1			Burkholderiales	1			Burkholderiaceae	1	Burkholderia	1
Otu1830	0	0	0	0	0	0	0	0	0	0	0	0	0	0	0	0	0	0	0	0	0	0	0	0	0	0	0	0	0	0	n	Proteobacteria	1	Alphaproteobacteria	1			Rhizobiales	1			Beijerinckiaceae	0.17	Methyloferula	0.07
Otu1831	0	0	0	0	0	0	0	0	0	0	0	0	0	0	0	0	0	0	0	0	0	0	0	0	0	0	0	0	0	0	n	Proteobacteria	0.96	Alphaproteobacteria	0.84			Rhizobiales	0.84			Rhodobiaceae	0.29	Dichotomicrobium	0.25
Otu1832	0	0	0	0	0	0	0	0	0	0	0	0	0	0	0	0	0	0	0	0	0	0	0	0	0	0	0	0	0	0	n	Proteobacteria	0.8	Alphaproteobacteria	0.75			Caulobacterales	0.25			Hyphomonadaceae	0.25	Marinicauda	0.23
Otu1833	0	0	0	0	0	0	0	0	0	0	0	0	0	0	0	0	0	0	0	0	0	0	0	0	0	0	0	0	0	0	n	Firmicutes	0.54	Bacilli	0.53			Bacillales	0.48			Bacillaceae 1	0.46	Falsibacillus	0.4
Otu1834	0	0	0	0	0	0	0	0	0	0	0	0	0	0	0	0	0	0	0	0	0	0	0	0	0	0	0	0	0	0	n	Proteobacteria	0.55	Gammaproteobacteria	0.26			Chromatiales	0.13			Halothiobacillaceae	0.13	Thiovirga	0.13
Otu1835	0	0	0	0	0	0	0	0	0	0	0	0	0	0	0	0	0	0	0	0	0	0	0	0	0	0	0	0	0	0	n	Actinobacteria	0.99	Actinobacteria	0.99	Acidimicrobidae	0.77	Acidimicrobiales	0.77	"Acidimicrobineae"	0.77	"Acidimicrobineae"_incertae_sedis	0.45	Aciditerrimonas	0.45
Otu1836	0	0	0	0	0	0	0	0	0	0	0	0	0	0	0	0	0	0	0	0	0	0	0	0	0	0	0	0	0	0	n	Proteobacteria	0.99	Deltaproteobacteria	0.87			Myxococcales	0.85	Nannocystineae	0.75	Kofleriaceae	0.35	Kofleria	0.35
Otu1837	0	0	0	0	0	0	0	0	0	0	0	0	0	0	0	0	0	0	0	0	0	0	0	0	0	0	0	0	0	0	n	Proteobacteria	1	Alphaproteobacteria	1			Rhizobiales	0.26			Rhodobiaceae	0.26	Roseospirillum	0.26
Otu1838	0	0	0	0	0	0	0	0	0	0	0	0	0	0	0	0	0	0	0	0	0	0	0	0	0	0	0	0	0	0	n	Proteobacteria	0.72	Alphaproteobacteria	0.69			Rhizobiales	0.53			Hyphomicrobiaceae	0.24	Ancalomicrobium	0.22
Otu1839	0	0	0	0	0	0	0	0	0	0	0	0	0	0	0	0	0	0	0	0	0	0	0	0	0	0	0	0	0	0	n	Proteobacteria	0.96	Alphaproteobacteria	0.83			Rhodospirillales	0.69			Acetobacteraceae	0.69	Rhodovarius	0.24
Otu184	0	0	0	0	0	0	0	0	0	0	0	0	0	0	0	0	0	0	0	0	0	0	0	0	0	0	0	0	0	0	n	Bacteroidetes	1	Sphingobacteriia	0.82			"Sphingobacteriales"	0.82			Sphingobacteriaceae	0.33	Solitalea	0.31
Otu1840	0	0	0	0	0	5	0	3	16	0	0	0	0	0	0	0	0	0	0	0	0.000213211	0	7.70555e-05	0.000398446	0	0	0	0	0	0	n	Proteobacteria	1	Alphaproteobacteria	0.99			Sphingomonadales	0.99			Erythrobacteraceae	0.99	Croceicoccus	0.98
Otu1841	0	0	0	0	0	0	0	0	0	0	0	0	0	0	0	0	0	0	0	0	0	0	0	0	0	0	0	0	0	0	n	Acidobacteria	0.54	Acidobacteria_Gp1	0.3									Candidatus Koribacter	0.21
Otu1842	0	0	0	0	0	0	0	0	0	0	0	0	0	0	0	0	0	0	0	0	0	0	0	0	0	0	0	0	0	0	n	Chloroflexi	0.49	Thermomicrobia	0.26			Thermomicrobiales	0.21			Thermomicrobiaceae	0.21	Thermorudis	0.21
Otu1843	0	0	0	0	0	0	0	0	0	0	0	0	0	0	0	0	0	0	0	0	0	0	0	0	0	0	0	0	0	0	n	Proteobacteria	0.93	Alphaproteobacteria	0.89			Rhodospirillales	0.86			Acetobacteraceae	0.84	Rhodovarius	0.13
Otu1844	0	0	0	0	0	0	0	0	0	0	0	0	0	0	0	0	0	0	0	0	0	0	0	0	0	0	0	0	0	0	n	Proteobacteria	1	Betaproteobacteria	0.92			Burkholderiales	0.78			Oxalobacteraceae	0.73	Pseudoduganella	0.68
Otu1845	0	0	0	0	0	0	0	0	0	0	0	0	0	0	0	0	0	0	0	0	0	0	0	0	0	0	0	0	0	0	n	Proteobacteria	0.49	Alphaproteobacteria	0.49			Rhizobiales	0.49			Xanthobacteraceae	0.42	Pseudolabrys	0.42
Otu1846	0	0	0	0	0	0	0	0	0	0	0	0	0	0	0	0	0	0	0	0	0	0	0	0	0	0	0	0	0	0	n	Chloroflexi	0.9	Chloroflexia	0.76			Kallotenuales	0.7			Kallotenuaceae	0.7	Kallotenue	0.7
Otu1847	0	0	0	0	0	0	0	0	0	0	0	0	0	0	0	0	0	0	0	0	0	0	0	0	0	0	0	0	0	0	n	Proteobacteria	1	Alphaproteobacteria	0.91			Rhizobiales	0.73			Beijerinckiaceae	0.46	Methyloferula	0.26
Otu1848	0	0	0	0	0	0	0	0	0	0	0	0	0	0	0	0	0	0	0	0	0	0	0	0	0	0	0	0	0	0	n	Acidobacteria	1	Acidobacteria_Gp3	1									Candidatus Solibacter	0.96
Otu1849	0	0	0	0	0	0	0	0	0	0	0	0	0	0	0	0	0	0	0	0	0	0	0	0	0	0	0	0	0	0	n	Acidobacteria	0.99	Acidobacteria_Gp3	0.99									Candidatus Solibacter	0.99
Otu185	0	0	0	0	0	41	0	0	0	0	0	0	0	0	0	0	0	0	0	0	0.00174833	0	0	0	0	0	0	0	0	0	n	Bacteroidetes	1	Flavobacteriia	1			"Flavobacteriales"	1			Flavobacteriaceae	1	Flavobacterium	0.93
Otu1850	0	0	0	0	0	0	0	0	0	0	0	0	0	0	0	0	0	0	0	0	0	0	0	0	0	0	0	0	0	0	n	Proteobacteria	1	Alphaproteobacteria	1			Rhizobiales	1			Methylocystaceae	1	Hansschlegelia	0.95
Otu1851	0	0	0	0	0	0	0	0	0	0	0	0	0	0	0	0	0	0	0	0	0	0	0	0	0	0	0	0	0	0	n	Proteobacteria	0.97	Alphaproteobacteria	0.85			Rhodospirillales	0.83			Acetobacteraceae	0.83	Humitalea	0.23
Otu1852	0	0	0	0	0	0	0	0	0	0	0	0	0	0	0	0	0	0	0	0	0	0	0	0	0	0	0	0	0	0	n	Proteobacteria	0.53	Alphaproteobacteria	0.53			Rhizobiales	0.53			Methylobacteriaceae	0.46	Psychroglaciecola	0.46
Otu1853	0	0	0	0	0	0	0	0	0	0	0	0	0	0	0	0	0	0	0	0	0	0	0	0	0	0	0	0	0	0	n	Proteobacteria	0.89	Alphaproteobacteria	0.22			Rhodospirillales	0.17			Rhodospirillaceae	0.14	Marispirillum	0.05
Otu1854	0	0	0	0	0	0	0	0	0	0	0	0	0	0	0	0	0	0	0	0	0	0	0	0	0	0	0	0	0	0	n	Proteobacteria	0.98	Betaproteobacteria	0.98			Burkholderiales	0.98			Oxalobacteraceae	0.94	Glaciimonas	0.21
Otu1855	0	0	0	0	0	0	0	0	0	0	0	0	0	0	0	0	0	0	0	0	0	0	0	0	0	0	0	0	0	0	n	Proteobacteria	0.96	Betaproteobacteria	0.84			Burkholderiales	0.81			Oxalobacteraceae	0.73	Paraherbaspirillum	0.34
Otu1856	0	0	0	0	0	0	0	0	0	0	0	0	0	0	0	0	0	0	0	0	0	0	0	0	0	0	0	0	0	0	n	Bacteroidetes	0.83	Flavobacteriia	0.82			"Flavobacteriales"	0.82			Flavobacteriaceae	0.82	Gilvibacter	0.23
Otu1857	0	0	0	0	0	0	0	0	0	0	0	0	0	0	0	0	0	0	0	0	0	0	0	0	0	0	0	0	0	0	n	Proteobacteria	0.92	Gammaproteobacteria	0.6			Pseudomonadales	0.16			Pseudomonadales_incertae_sedis	0.04	Dasania	0.04
Otu1858	0	0	0	0	0	0	0	0	0	0	0	0	0	0	0	0	0	0	0	0	0	0	0	0	0	0	0	0	0	0	n	Proteobacteria	0.94	Alphaproteobacteria	0.81			Rhizobiales	0.81			Xanthobacteraceae	0.48	Pseudolabrys	0.48
Otu1859	0	0	0	0	0	0	0	0	0	0	0	0	0	0	0	0	0	0	0	0	0	0	0	0	0	0	0	0	0	0	n	Proteobacteria	1	Betaproteobacteria	0.99			Burkholderiales	0.99			Comamonadaceae	0.74	Curvibacter	0.31
Otu186	0	0	0	0	0	0	0	0	0	0	0	0	0	0	0	0	0	0	0	0	0	0	0	0	0	0	0	0	0	0	n	Ignavibacteriae	0.97	Ignavibacteria	0.97			Ignavibacteriales	0.97			Ignavibacteriaceae	0.97	Ignavibacterium	0.77
Otu1860	0	0	0	0	0	0	0	0	0	0	0	0	0	0	0	0	0	0	0	0	0	0	0	0	0	0	0	0	0	0	n	Proteobacteria	0.74	Betaproteobacteria	0.72			Burkholderiales	0.5			Burkholderiaceae	0.35	Paucimonas	0.04
Otu1861	0	0	0	0	0	0	0	0	0	0	0	0	0	0	0	0	0	0	0	0	0	0	0	0	0	0	0	0	0	0	n	Proteobacteria	0.94	Betaproteobacteria	0.54			"Procabacteriales"	0.1			"Procabacteriaceae"	0.1	Candidatus Procabacter	0.1
Otu1862	0	0	0	0	0	0	0	0	0	0	0	0	0	0	0	0	0	0	0	0	0	0	0	0	0	0	0	0	0	0	n	Acidobacteria	0.47	Acidobacteria_Gp3	0.47									Candidatus Solibacter	0.47
Otu1863	0	0	0	0	0	0	0	0	0	0	0	0	0	0	0	0	0	0	0	0	0	0	0	0	0	0	0	0	0	0	n	Acidobacteria	1	Acidobacteria_Gp22	1									Gp22	1
Otu1864	0	0	0	0	0	0	0	0	0	0	0	0	0	0	0	0	0	0	0	0	0	0	0	0	0	0	0	0	0	0	n	Proteobacteria	1	Betaproteobacteria	1			Burkholderiales	1			Oxalobacteraceae	0.97	Herbaspirillum	0.93
Otu1865	0	0	0	0	0	0	0	0	0	0	0	0	0	0	0	0	0	0	0	0	0	0	0	0	0	0	0	0	0	0	n	Proteobacteria	0.98	Alphaproteobacteria	0.98			Sphingomonadales	0.98			Erythrobacteraceae	0.96	Croceicoccus	0.33
Otu1866	0	0	0	0	0	0	0	0	0	0	0	0	0	0	0	0	0	0	0	0	0	0	0	0	0	0	0	0	0	0	n	Proteobacteria	0.49	Betaproteobacteria	0.38			Burkholderiales	0.32			Burkholderiales_incertae_sedis	0.3	Xylophilus	0.3
Otu1867	0	0	0	0	0	0	0	0	0	0	0	0	0	0	0	0	0	0	0	0	0	0	0	0	0	0	0	0	0	0	n	Bacteroidetes	1	Cytophagia	0.79			Cytophagales	0.79			Cytophagaceae	0.55	Adhaeribacter	0.44
Otu1868	0	0	0	0	0	0	0	0	0	0	0	0	0	0	0	0	0	0	0	0	0	0	0	0	0	0	0	0	0	0	n	Proteobacteria	0.87	Alphaproteobacteria	0.8			Rhizobiales	0.77			Xanthobacteraceae	0.46	Pseudolabrys	0.46
Otu1869	0	0	0	0	0	0	0	0	0	0	0	0	0	0	0	0	0	0	0	0	0	0	0	0	0	0	0	0	0	0	n	Proteobacteria	0.97	Alphaproteobacteria	0.93			Alphaproteobacteria_incertae_sedis	0.43					Rhizomicrobium	0.43
Otu187	0	0	0	0	0	0	0	0	0	0	0	0	0	0	0	0	0	0	0	0	0	0	0	0	0	0	0	0	0	0	n	Proteobacteria	1	Alphaproteobacteria	1			Rhizobiales	1			Rhodobiaceae	0.76	Rhodoligotrophos	0.73
Otu1870	0	0	0	0	0	0	0	0	0	0	0	0	0	0	0	0	0	0	0	0	0	0	0	0	0	0	0	0	0	0	n	Proteobacteria	0.82	Betaproteobacteria	0.8			Burkholderiales	0.8			Burkholderiales_incertae_sedis	0.77	Methylibium	0.32
Otu1871	0	0	0	0	0	0	0	0	0	0	0	0	0	0	0	0	0	0	0	0	0	0	0	0	0	0	0	0	0	0	n	Proteobacteria	0.89	Deltaproteobacteria	0.76			Myxococcales	0.65	Nannocystineae	0.51	"Haliangiaceae"	0.41	Haliangium	0.41
Otu1872	0	0	0	0	0	0	0	0	0	0	0	0	0	0	0	0	0	0	0	0	0	0	0	0	0	0	0	0	0	0	n	Bacteroidetes	0.97	Sphingobacteriia	0.43			"Sphingobacteriales"	0.43			"Saprospiraceae"	0.1	Haliscomenobacter	0.1
Otu1873	0	0	0	0	0	0	0	0	0	0	0	0	0	0	0	0	0	0	0	0	0	0	0	0	0	0	0	0	0	0	n	Bacteroidetes	1	Sphingobacteriia	1			"Sphingobacteriales"	1			Sphingobacteriaceae	1	Olivibacter	0.92
Otu1874	0	0	0	0	0	0	0	0	0	0	0	0	0	0	0	0	0	0	0	0	0	0	0	0	0	0	0	0	0	0	n	Proteobacteria	0.73	Zetaproteobacteria	0.11			"Mariprofundales"	0.11			"Mariprofundaceae"	0.11	Mariprofundus	0.11
Otu1875	0	0	0	0	0	0	0	0	0	0	0	0	0	0	0	0	0	0	0	0	0	0	0	0	0	0	0	0	0	0	n	Actinobacteria	1	Actinobacteria	1	Actinobacteridae	1	Actinomycetales	1	Propionibacterineae	0.99	Nocardioidaceae	0.99	Nocardioides	0.96
Otu1876	0	0	0	0	0	0	0	0	0	0	0	0	0	0	0	0	0	0	0	0	0	0	0	0	0	0	0	0	0	0	n	Acidobacteria	0.95	Acidobacteria_Gp1	0.94									Candidatus Koribacter	0.92
Otu1877	0	0	0	0	0	0	0	0	0	0	0	0	0	0	0	0	0	0	0	0	0	0	0	0	0	0	0	0	0	0	n	Actinobacteria	0.98	Actinobacteria	0.96	Rubrobacteridae	0.33	Solirubrobacterales	0.33			Conexibacteraceae	0.33	Conexibacter	0.33
Otu1878	0	0	0	0	0	0	0	0	0	0	0	0	0	0	0	0	0	0	0	0	0	0	0	0	0	0	0	0	0	0	n	Acidobacteria	0.98	Acidobacteria_Gp3	0.98									Bryobacter	0.36
Otu1879	0	0	0	0	0	0	0	0	0	0	0	0	0	0	0	0	0	0	0	0	0	0	0	0	0	0	0	0	0	0	n	Proteobacteria	0.77	Betaproteobacteria	0.75			Burkholderiales	0.74			Burkholderiales_incertae_sedis	0.5	Xylophilus	0.49
Otu188	0	0	0	0	0	0	0	0	0	0	0	0	0	0	0	0	0	0	0	0	0	0	0	0	0	0	0	0	0	0	n	Proteobacteria	1	Alphaproteobacteria	0.99			Sneathiellales	0.47			Sneathiellaceae	0.47	Taonella	0.32
Otu1880	0	0	0	0	0	0	0	0	0	0	0	0	0	0	0	0	0	0	0	0	0	0	0	0	0	0	0	0	0	0	n	Proteobacteria	0.97	Gammaproteobacteria	0.47			Xanthomonadales	0.44			Sinobacteraceae	0.44	Povalibacter	0.39
Otu1881	0	0	0	0	0	0	0	0	0	0	0	0	0	0	0	0	0	0	0	0	0	0	0	0	0	0	0	0	0	0	n	Proteobacteria	0.89	Gammaproteobacteria	0.82			Alteromonadales	0.21			Alteromonadaceae	0.21	Chromatocurvus	0.21
Otu1882	0	0	0	0	0	0	0	0	0	0	0	0	0	0	0	0	0	0	0	0	0	0	0	0	0	0	0	0	0	0	n	Acidobacteria	0.99	Acidobacteria_Gp3	0.99									Candidatus Solibacter	0.99
Otu1883	0	0	0	0	0	0	0	0	0	0	0	0	0	0	0	0	0	0	0	0	0	0	0	0	0	0	0	0	0	0	n	Proteobacteria	1	Alphaproteobacteria	1			Rhizobiales	0.55			Rhizobiales_incertae_sedis	0.48	Variibacter	0.45
Otu1884	0	0	0	0	0	0	0	0	0	0	0	0	0	0	0	0	0	0	0	0	0	0	0	0	0	0	0	0	0	0	n	Proteobacteria	1	Deltaproteobacteria	1			Bdellovibrionales	1			Bdellovibrionaceae	1	Bdellovibrio	1
Otu1885	0	0	0	0	0	0	0	0	0	0	0	0	0	0	0	0	0	0	0	0	0	0	0	0	0	0	0	0	0	0	n	Proteobacteria	0.79	Gammaproteobacteria	0.5			Chromatiales	0.19			Thioalkalispiraceae	0.05	Thiohalophilus	0.05
Otu1886	0	0	0	0	0	0	0	0	0	0	0	0	0	0	0	0	0	0	0	0	0	0	0	0	0	0	0	0	0	0	n	Proteobacteria	0.93	Alphaproteobacteria	0.89			Rhizobiales	0.86			Bradyrhizobiaceae	0.75	Tardiphaga	0.68
Otu1887	0	0	0	0	0	0	0	0	0	0	0	0	0	0	0	0	0	0	0	0	0	0	0	0	0	0	0	0	0	0	n	Proteobacteria	0.7	Deltaproteobacteria	0.3			Deltaproteobacteria_incertae_sedis	0.17					Dissulfuribacter	0.17
Otu1888	0	0	0	0	0	0	0	0	0	0	0	0	0	0	0	0	0	0	0	0	0	0	0	0	0	0	0	0	0	0	n	Proteobacteria	0.98	Alphaproteobacteria	0.97			Rhodospirillales	0.68					Reyranella	0.67
Otu1889	0	0	0	0	0	0	0	0	0	0	0	0	0	0	0	0	0	0	0	0	0	0	0	0	0	0	0	0	0	0	n	Actinobacteria	0.48	Actinobacteria	0.48	Actinobacteridae	0.44	Actinomycetales	0.44	Micromonosporineae	0.06	Micromonosporaceae	0.06	Phytomonospora	0.06
Otu189	0	0	0	0	0	0	0	0	0	0	0	0	0	0	0	0	0	0	0	0	0	0	0	0	0	0	0	0	0	0	n	Bacteroidetes	1	Cytophagia	1			Cytophagales	1			Cytophagaceae	1	Sporocytophaga	1
Otu1890	0	0	0	0	0	0	0	0	0	0	0	0	0	0	0	0	0	0	0	0	0	0	0	0	0	0	0	0	0	0	n	Proteobacteria	0.55	Deltaproteobacteria	0.15			Syntrophobacterales	0.05			Syntrophobacteraceae	0.05	Desulfovirga	0.02
Otu1891	0	0	0	0	0	0	0	0	0	0	0	0	0	0	0	0	0	0	0	0	0	0	0	0	0	0	0	0	0	0	n	Proteobacteria	0.97	Gammaproteobacteria	0.91			Legionellales	0.67			Coxiellaceae	0.67	Diplorickettsia	0.57
Otu1892	0	0	0	0	0	0	0	0	0	0	0	1	0	0	0	0	0	0	0	0	0	0	0	0	0	0	2.36967e-05	0	0	0	n	Bacteroidetes	1	Sphingobacteriia	1			"Sphingobacteriales"	1			Chitinophagaceae	1	Chitinophaga	1
Otu1893	0	0	0	0	0	0	0	0	0	0	0	0	0	0	0	0	0	0	0	0	0	0	0	0	0	0	0	0	0	0	n	Firmicutes	0.56	Clostridia	0.55			Clostridiales	0.55			Ruminococcaceae	0.54	Anaerotruncus	0.47
Otu1894	0	0	0	0	0	0	0	0	0	0	0	0	0	0	0	0	0	0	0	0	0	0	0	0	0	0	0	0	0	0	n	Proteobacteria	0.99	Alphaproteobacteria	0.99			Rhizobiales	0.99			Hyphomicrobiaceae	0.32	Aquabacter	0.32
Otu19	0	0	0	0	0	0	0	0	0	0	0	0	0	0	0	0	0	0	0	0	0	0	0	0	0	0	0	0	0	0	n	Proteobacteria	1	Alphaproteobacteria	1			Rhizobiales	1			Xanthobacteraceae	0.53	Pseudolabrys	0.53
Otu190	0	0	0	0	0	0	0	0	0	0	0	0	0	0	0	0	0	0	0	0	0	0	0	0	0	0	0	0	0	0	n	Proteobacteria	1	Betaproteobacteria	1			Rhodocyclales	0.66			Rhodocyclaceae	0.66	Azospira	0.19
Otu191	0	0	0	0	0	0	0	0	0	0	0	0	0	0	0	0	0	0	0	0	0	0	0	0	0	0	0	0	0	0	n	Firmicutes	1	Bacilli	1			Bacillales	1			Paenibacillaceae 2	1	Ammoniphilus	0.87
Otu192	0	0	0	0	0	0	0	0	0	0	0	0	0	0	0	0	0	0	0	0	0	0	0	0	0	0	0	0	0	0	n	Proteobacteria	1	Alphaproteobacteria	1			Rhizobiales	0.91			Xanthobacteraceae	0.2	Pseudolabrys	0.1
Otu193	0	1	0	72	0	0	0	0	1	0	0	0	0	0	0	0	4.22994e-05	0	0.00190779	0	0	0	0	2.49029e-05	0	0	0	0	0	0	n	Proteobacteria	0.98	Gammaproteobacteria	0.97			Legionellales	0.1			Coxiellaceae	0.1	Coxiella	0.07
Otu194	0	0	0	0	0	0	0	0	0	0	0	0	0	0	0	0	0	0	0	0	0	0	0	0	0	0	0	0	0	0	n	Verrucomicrobia	1	Subdivision3	0.96									Subdivision3_genera_incertae_sedis	0.91
Otu195	0	0	0	0	0	0	0	0	0	1	0	0	0	0	0	0	0	0	0	0	0	0	0	0	2.0014e-05	0	0	0	0	0	n	Actinobacteria	1	Actinobacteria	1	Actinobacteridae	1	Actinomycetales	1	Micromonosporineae	1	Micromonosporaceae	1	Couchioplanes	0.62
Otu196	0	0	0	0	0	0	0	0	0	0	1	17	0	0	1	0	0	0	0	0	0	0	0	0	0	1.46841e-05	0.000402844	0	0	1.76975e-05	n	Actinobacteria	1	Actinobacteria	1	Actinobacteridae	1	Actinomycetales	1	Pseudonocardineae	1	Pseudonocardiaceae	1	Amycolatopsis	1
Otu197	0	0	0	0	0	0	0	0	0	0	0	0	0	0	0	0	0	0	0	0	0	0	0	0	0	0	0	0	0	0	n	Acidobacteria	1	Acidobacteria_Gp3	1									Candidatus Solibacter	1
Otu198	0	0	0	0	0	0	0	0	0	0	0	0	0	0	0	0	0	0	0	0	0	0	0	0	0	0	0	0	0	0	n	Bacteroidetes	1	Sphingobacteriia	1			"Sphingobacteriales"	1			Sphingobacteriaceae	1	Sphingobacterium	1
Otu199	0	0	0	0	0	0	0	0	0	0	0	0	0	0	0	0	0	0	0	0	0	0	0	0	0	0	0	0	0	0	n	Acidobacteria	0.95	Acidobacteria_Gp3	0.95									Bryobacter	0.43
Otu200	0	0	0	0	0	0	0	0	0	0	0	0	0	0	0	0	0	0	0	0	0	0	0	0	0	0	0	0	0	0	n	Actinobacteria	1	Actinobacteria	1	Actinobacteridae	0.99	Actinomycetales	0.99	Frankineae	0.82	Sporichthyaceae	0.66	Sporichthya	0.66
Otu201	0	0	0	0	0	0	0	0	0	1	0	0	0	0	0	0	0	0	0	0	0	0	0	0	2.0014e-05	0	0	0	0	0	n	Proteobacteria	1	Alphaproteobacteria	1			Rhizobiales	1			Beijerinckiaceae	0.89	Methylovirgula	0.86
Otu202	0	0	0	0	0	30	17	81	22	15	0	0	0	0	0	0	0	0	0	0	0.00127926	0.000445003	0.0020805	0.000547863	0.00030021	0	0	0	0	0	n	Firmicutes	1	Bacilli	1			Bacillales	1			Paenibacillaceae 1	1	Paenibacillus	0.99
Otu203	0	0	0	0	0	0	0	0	0	0	0	0	0	0	0	0	0	0	0	0	0	0	0	0	0	0	0	0	0	0	n	Actinobacteria	1	Actinobacteria	1	Actinobacteridae	1	Actinomycetales	1	Propionibacterineae	1	Propionibacteriaceae	1	Friedmanniella	0.82
Otu204	0	0	0	0	0	0	0	0	0	0	0	0	0	0	0	0	0	0	0	0	0	0	0	0	0	0	0	0	0	0	n	Bacteroidetes	1	Sphingobacteriia	0.94			"Sphingobacteriales"	0.94			Chitinophagaceae	0.77	Vibrionimonas	0.28
Otu205	0	0	0	0	0	0	0	0	0	0	0	0	0	0	0	0	0	0	0	0	0	0	0	0	0	0	0	0	0	0	n	Acidobacteria	1	Acidobacteria_Gp3	1									Gp3	0.61
Otu206	0	0	0	0	0	0	0	0	0	0	0	5	0	0	1	0	0	0	0	0	0	0	0	0	0	0	0.000118483	0	0	1.76975e-05	n	Proteobacteria	1	Alphaproteobacteria	1			Rhizobiales	1			Bradyrhizobiaceae	0.59	Oligotropha	0.36
Otu207	0	0	0	0	0	0	0	0	0	0	0	0	0	0	0	0	0	0	0	0	0	0	0	0	0	0	0	0	0	0	n	Proteobacteria	0.98	Alphaproteobacteria	0.98			Rhodospirillales	0.92			Rhodospirillaceae	0.89	Rhodospirillum	0.16
Otu208	0	0	0	0	0	0	0	0	0	0	0	0	0	0	0	0	0	0	0	0	0	0	0	0	0	0	0	0	0	0	n	Actinobacteria	0.95	Actinobacteria	0.95	Rubrobacteridae	0.89	Solirubrobacterales	0.81			Conexibacteraceae	0.81	Conexibacter	0.81
Otu209	0	0	0	0	0	0	0	0	0	0	0	0	0	0	0	0	0	0	0	0	0	0	0	0	0	0	0	0	0	0	n	Proteobacteria	1	Gammaproteobacteria	1			Xanthomonadales	0.92			Sinobacteraceae	0.92	Steroidobacter	0.66
Otu210	0	0	0	0	0	0	0	0	0	1	0	0	0	0	0	0	0	0	0	0	0	0	0	0	2.0014e-05	0	0	0	0	0	n	Proteobacteria	1	Gammaproteobacteria	0.99			Xanthomonadales	0.95			Sinobacteraceae	0.95	Povalibacter	0.83
Otu211	0	0	0	0	0	0	0	0	0	0	0	0	57	0	121	0	0	0	0	0	0	0	0	0	0	0	0	0.00107576	0	0.0021414	n	Firmicutes	1	Bacilli	0.97			Bacillales	0.97			Paenibacillaceae 1	0.95	Paenibacillus	0.89
Otu212	0	0	0	0	0	0	0	0	0	0	0	0	0	0	0	0	0	0	0	0	0	0	0	0	0	0	0	0	0	0	n	Proteobacteria	1	Alphaproteobacteria	1			Rhizobiales	0.98			Methylobacteriaceae	0.47	Microvirga	0.47
Otu213	0	0	0	0	0	0	0	0	0	0	0	0	0	0	0	0	0	0	0	0	0	0	0	0	0	0	0	0	0	0	n	Proteobacteria	1	Alphaproteobacteria	1			Rhodospirillales	1			Acetobacteraceae	1	Ameyamaea	0.37
Otu214	0	0	0	0	0	0	0	0	0	0	0	0	0	0	0	0	0	0	0	0	0	0	0	0	0	0	0	0	0	0	n	Proteobacteria	1	Alphaproteobacteria	1			Rhizobiales	0.97			Xanthobacteraceae	0.38	Pseudoxanthobacter	0.33
Otu215	0	0	0	0	0	0	0	0	0	0	0	0	0	0	0	0	0	0	0	0	0	0	0	0	0	0	0	0	0	0	n	Actinobacteria	1	Actinobacteria	1	Actinobacteridae	1	Actinomycetales	1	Micromonosporineae	1	Micromonosporaceae	1	Actinoplanes	0.42
Otu216	0	0	0	0	0	0	0	0	0	0	0	0	0	0	0	0	0	0	0	0	0	0	0	0	0	0	0	0	0	0	n	Verrucomicrobia	1	Subdivision3	0.99									Subdivision3_genera_incertae_sedis	0.99
Otu217	0	0	0	0	0	0	0	0	0	0	0	0	0	0	0	0	0	0	0	0	0	0	0	0	0	0	0	0	0	0	n	Gemmatimonadetes	0.55	Gemmatimonadetes	0.55			Gemmatimonadales	0.55			Gemmatimonadaceae	0.55	Gemmatimonas	0.55
Otu218	0	0	0	0	0	0	0	0	0	0	0	0	0	0	0	0	0	0	0	0	0	0	0	0	0	0	0	0	0	0	n	Verrucomicrobia	1	Subdivision3	0.98									Subdivision3_genera_incertae_sedis	0.91
Otu219	0	0	1	0	0	4	0	0	0	0	0	0	0	0	0	0	0	3.66139e-05	0	0	0.000170568	0	0	0	0	0	0	0	0	0	n	Firmicutes	1	Bacilli	1			Bacillales	1			Paenibacillaceae 1	1	Paenibacillus	0.98
Otu220	17	11	10	79	22	0	0	0	0	0	0	0	0	0	0	0.000484027	0.000465293	0.000366139	0.00209327	0.000809181	0	0	0	0	0	0	0	0	0	0	n	Proteobacteria	1	Gammaproteobacteria	1			"Enterobacteriales"	1			Enterobacteriaceae	1	Erwinia	0.98
Otu221	0	0	0	0	0	0	0	0	0	0	24	0	0	0	1	0	0	0	0	0	0	0	0	0	0	0.000352418	0	0	0	1.76975e-05	n	Actinobacteria	1	Actinobacteria	1	Actinobacteridae	1	Actinomycetales	1	Propionibacterineae	0.79	Nocardioidaceae	0.77	Nocardioides	0.74
Otu222	2	4	19	4	4	0	0	0	0	0	0	0	0	0	0	5.69444e-05	0.000169198	0.000695665	0.000105988	0.000147124	0	0	0	0	0	0	0	0	0	0	n	Firmicutes	1	Bacilli	1			Bacillales	1			Paenibacillaceae 1	1	Cohnella	0.57
Otu223	0	0	0	0	0	0	0	0	0	0	0	0	0	0	0	0	0	0	0	0	0	0	0	0	0	0	0	0	0	0	n	Proteobacteria	1	Alphaproteobacteria	1			Rhizobiales	1			Roseiarcaceae	0.98	Roseiarcus	0.98
Otu224	0	0	0	0	0	0	0	0	0	0	0	0	0	0	0	0	0	0	0	0	0	0	0	0	0	0	0	0	0	0	n	Planctomycetes	0.95	Planctomycetia	0.85			Planctomycetales	0.85			Planctomycetaceae	0.85	Pirellula	0.49
Otu225	0	0	0	0	0	0	0	0	0	0	0	0	0	0	0	0	0	0	0	0	0	0	0	0	0	0	0	0	0	0	n	Gemmatimonadetes	0.81	Gemmatimonadetes	0.81			Gemmatimonadales	0.81			Gemmatimonadaceae	0.81	Gemmatimonas	0.81
Otu226	0	0	0	0	0	0	0	0	0	0	0	0	0	0	0	0	0	0	0	0	0	0	0	0	0	0	0	0	0	0	n	Firmicutes	1	Bacilli	1			Bacillales	1			Paenibacillaceae 1	1	Paenibacillus	0.51
Otu227	0	0	0	0	0	0	0	0	0	0	0	0	0	0	0	0	0	0	0	0	0	0	0	0	0	0	0	0	0	0	n	Acidobacteria	1	Acidobacteria_Gp3	1									Paludibaculum	0.49
Otu228	0	1	0	1	0	0	0	0	0	0	1	0	4	2	0	0	4.22994e-05	0	2.64971e-05	0	0	0	0	0	0	1.46841e-05	0	7.54916e-05	3.48189e-05	0	n	Proteobacteria	1	Betaproteobacteria	1			Burkholderiales	0.99			Oxalobacteraceae	0.91	Noviherbaspirillum	0.84
Otu229	0	0	0	0	0	0	0	0	0	0	0	0	0	0	0	0	0	0	0	0	0	0	0	0	0	0	0	0	0	0	n	Proteobacteria	1	Alphaproteobacteria	1			Caulobacterales	0.98			Caulobacteraceae	0.98	Caulobacter	0.92
Otu23	0	0	0	1	0	2	0	0	3	0	0	0	0	0	0	0	0	0	2.64971e-05	0	8.52842e-05	0	0	7.47086e-05	0	0	0	0	0	0	n	Proteobacteria	1	Alphaproteobacteria	1			Caulobacterales	1			Caulobacteraceae	1	Asticcacaulis	1
Otu230	0	0	0	0	0	0	0	0	0	0	0	0	0	0	0	0	0	0	0	0	0	0	0	0	0	0	0	0	0	0	n	Firmicutes	1	Bacilli	1			Bacillales	1			Paenibacillaceae 1	1	Cohnella	0.95
Otu231	0	0	0	0	0	0	0	0	0	0	0	0	0	0	0	0	0	0	0	0	0	0	0	0	0	0	0	0	0	0	n	Firmicutes	1	Bacilli	1			Bacillales	1			Bacillaceae 1	0.78	Bacillus	0.78
Otu232	0	0	0	0	0	0	0	0	0	0	0	0	0	0	0	0	0	0	0	0	0	0	0	0	0	0	0	0	0	0	n	Proteobacteria	1	Alphaproteobacteria	1			Rhizobiales	1			Methylocystaceae	0.26	Methylosinus	0.25
Otu233	0	0	0	0	0	0	0	0	0	0	0	0	0	0	0	0	0	0	0	0	0	0	0	0	0	0	0	0	0	0	n	Acidobacteria	1	Acidobacteria_Gp1	1									Candidatus Koribacter	0.45
Otu234	0	0	0	0	0	0	0	0	0	0	0	0	0	0	0	0	0	0	0	0	0	0	0	0	0	0	0	0	0	0	n	Actinobacteria	1	Actinobacteria	1	Actinobacteridae	1	Actinomycetales	1	Propionibacterineae	1	Nocardioidaceae	1	Kribbella	1
Otu235	0	0	0	0	0	0	0	0	0	0	0	0	0	0	0	0	0	0	0	0	0	0	0	0	0	0	0	0	0	0	n	Verrucomicrobia	0.99	Subdivision3	0.99									Subdivision3_genera_incertae_sedis	0.99
Otu236	0	0	0	0	0	0	0	0	0	0	0	0	0	0	0	0	0	0	0	0	0	0	0	0	0	0	0	0	0	0	n	Proteobacteria	1	Deltaproteobacteria	1			Bdellovibrionales	1			Bdellovibrionaceae	1	Bdellovibrio	1
Otu237	0	0	0	0	0	0	0	0	0	0	0	0	0	0	0	0	0	0	0	0	0	0	0	0	0	0	0	0	0	0	n	Actinobacteria	0.99	Actinobacteria	0.97	Rubrobacteridae	0.96	Gaiellales	0.96			Gaiellaceae	0.96	Gaiella	0.96
Otu238	0	0	0	0	0	0	0	0	0	0	0	0	0	0	0	0	0	0	0	0	0	0	0	0	0	0	0	0	0	0	n	Proteobacteria	1	Alphaproteobacteria	1			Rhizobiales	1			Methylocystaceae	0.42	Methylocystis	0.29
Otu239	0	0	0	0	0	0	0	0	0	0	0	0	0	0	0	0	0	0	0	0	0	0	0	0	0	0	0	0	0	0	n	Bacteroidetes	1	Sphingobacteriia	0.85			"Sphingobacteriales"	0.85			Chitinophagaceae	0.58	Vibrionimonas	0.05
Otu240	0	0	0	0	0	0	0	0	0	0	0	0	0	0	0	0	0	0	0	0	0	0	0	0	0	0	0	0	0	0	n	Proteobacteria	0.72	Deltaproteobacteria	0.49			Myxococcales	0.34	Cystobacterineae	0.28	Cystobacteraceae	0.21	Melittangium	0.13
Otu241	0	0	0	0	0	0	0	0	0	1	0	0	0	0	0	0	0	0	0	0	0	0	0	0	2.0014e-05	0	0	0	0	0	n	Gemmatimonadetes	0.83	Gemmatimonadetes	0.83			Gemmatimonadales	0.83			Gemmatimonadaceae	0.83	Gemmatimonas	0.83
Otu242	0	0	0	0	0	0	0	0	0	0	2	1	0	4	3	0	0	0	0	0	0	0	0	0	0	2.93681e-05	2.36967e-05	0	6.96379e-05	5.30926e-05	n	Proteobacteria	1	Gammaproteobacteria	1			Xanthomonadales	1			Sinobacteraceae	1	Nevskia	0.99
Otu243	0	0	0	0	0	0	0	0	0	0	0	0	0	0	0	0	0	0	0	0	0	0	0	0	0	0	0	0	0	0	n	Proteobacteria	1	Alphaproteobacteria	1			Rhodospirillales	0.96			Rhodospirillaceae	0.83	Phaeospirillum	0.42
Otu244	0	0	0	0	0	0	0	0	0	0	0	0	0	0	0	0	0	0	0	0	0	0	0	0	0	0	0	0	0	0	n	Proteobacteria	1	Betaproteobacteria	0.95			Burkholderiales	0.72			Alcaligenaceae	0.32	Paralcaligenes	0.05
Otu245	0	0	0	0	0	0	0	0	0	0	0	0	0	0	0	0	0	0	0	0	0	0	0	0	0	0	0	0	0	0	n	Firmicutes	1	Bacilli	1			Bacillales	1			Paenibacillaceae 1	0.95	Paenibacillus	0.9
Otu246	0	0	0	0	0	0	0	0	0	0	0	0	0	0	0	0	0	0	0	0	0	0	0	0	0	0	0	0	0	0	n	Actinobacteria	1	Actinobacteria	1	Actinobacteridae	1	Actinomycetales	1	Streptosporangineae	1	Streptosporangiaceae	1	Microbispora	1
Otu247	0	0	0	0	0	0	0	0	0	0	0	0	0	0	0	0	0	0	0	0	0	0	0	0	0	0	0	0	0	0	n	Actinobacteria	1	Actinobacteria	1	Rubrobacteridae	1	Gaiellales	1			Gaiellaceae	1	Gaiella	1
Otu248	0	0	0	0	0	0	0	0	0	0	1	0	0	0	0	0	0	0	0	0	0	0	0	0	0	1.46841e-05	0	0	0	0	n	Acidobacteria	1	Acidobacteria_Gp1	1									Terriglobus	0.36
Otu249	25	12	25	133	30	4	2	7	21	0	0	0	0	0	0	0.000711805	0.000507593	0.000915349	0.00352411	0.00110343	0.000170568	5.23533e-05	0.000179796	0.00052296	0	0	0	0	0	0	n	Proteobacteria	1	Gammaproteobacteria	0.64			"Enterobacteriales"	0.63			Enterobacteriaceae	0.63	Siccibacter	0.6
Otu25	0	0	0	0	0	42	22	25	4	34	0	0	0	0	0	0	0	0	0	0	0.00179097	0.000575886	0.000642129	9.96115e-05	0.000680476	0	0	0	0	0	n	Proteobacteria	1	Alphaproteobacteria	1			Caulobacterales	0.99			Caulobacteraceae	0.99	Caulobacter	0.98
Otu250	0	0	0	0	0	0	0	0	0	0	0	0	0	0	0	0	0	0	0	0	0	0	0	0	0	0	0	0	0	0	n	Gemmatimonadetes	0.93	Gemmatimonadetes	0.93			Gemmatimonadales	0.93			Gemmatimonadaceae	0.93	Gemmatimonas	0.93
Otu251	0	0	0	0	0	0	0	0	0	0	0	0	0	0	0	0	0	0	0	0	0	0	0	0	0	0	0	0	0	0	n	Acidobacteria	1	Acidobacteria_Gp3	1									Paludibaculum	0.5
Otu252	0	0	0	0	0	0	0	0	0	0	0	0	0	0	0	0	0	0	0	0	0	0	0	0	0	0	0	0	0	0	n	Acidobacteria	1	Acidobacteria_Gp1	1									Gp1	0.6
Otu253	0	0	0	0	0	0	0	0	0	0	0	0	0	0	0	0	0	0	0	0	0	0	0	0	0	0	0	0	0	0	n	Acidobacteria	0.97	Acidobacteria_Gp3	0.97									Bryobacter	0.37
Otu254	0	0	0	0	0	0	0	0	1	0	8	6	0	0	0	0	0	0	0	0	0	0	0	2.49029e-05	0	0.000117473	0.00014218	0	0	0	n	Proteobacteria	1	Alphaproteobacteria	1			Rhizobiales	1			Hyphomicrobiaceae	1	Hyphomicrobium	1
Otu255	0	0	0	0	0	0	0	0	0	0	0	0	0	0	0	0	0	0	0	0	0	0	0	0	0	0	0	0	0	0	n	Acidobacteria	0.99	Acidobacteria_Gp1	0.99									Gp1	0.52
Otu256	0	0	0	0	0	0	0	0	0	0	0	0	0	0	0	0	0	0	0	0	0	0	0	0	0	0	0	0	0	0	n	Acidobacteria	1	Acidobacteria_Gp3	1									Bryobacter	0.6
Otu257	0	0	0	0	0	0	0	0	0	0	0	0	0	0	0	0	0	0	0	0	0	0	0	0	0	0	0	0	0	0	n	Bacteroidetes	1	Cytophagia	1			Cytophagales	1			Cytophagaceae	1	Adhaeribacter	1
Otu258	0	0	0	0	0	0	0	0	0	0	0	0	0	0	0	0	0	0	0	0	0	0	0	0	0	0	0	0	0	0	n	Proteobacteria	0.75	Deltaproteobacteria	0.56			Myxococcales	0.31			Sandaracinaceae	0.16	Sandaracinus	0.16
Otu259	0	0	0	0	0	1	0	3	0	0	0	0	0	0	0	0	0	0	0	0	4.26421e-05	0	7.70555e-05	0	0	0	0	0	0	0	n	Actinobacteria	1	Actinobacteria	1	Rubrobacteridae	1	Solirubrobacterales	1			Conexibacteraceae	0.91	Conexibacter	0.91
Otu26	0	0	0	0	0	0	0	0	1	0	0	0	0	0	0	0	0	0	0	0	0	0	0	2.49029e-05	0	0	0	0	0	0	n	Proteobacteria	1	Betaproteobacteria	0.95			Rhodocyclales	0.54			Rhodocyclaceae	0.54	Uliginosibacterium	0.19
Otu260	0	0	0	0	0	0	0	0	0	0	0	0	0	0	0	0	0	0	0	0	0	0	0	0	0	0	0	0	0	0	n	Actinobacteria	1	Actinobacteria	1	Acidimicrobidae	0.81	Acidimicrobiales	0.81	"Acidimicrobineae"	0.81	"Acidimicrobineae"_incertae_sedis	0.74	Aciditerrimonas	0.74
Otu261	0	0	0	0	0	0	0	0	1	0	0	0	0	0	0	0	0	0	0	0	0	0	0	2.49029e-05	0	0	0	0	0	0	n	Proteobacteria	1	Alphaproteobacteria	1			Sphingomonadales	0.96			Sphingomonadaceae	0.95	Sphingomonas	0.83
Otu262	0	0	0	0	0	0	0	0	0	0	0	0	0	0	0	0	0	0	0	0	0	0	0	0	0	0	0	0	0	0	n	Proteobacteria	1	Alphaproteobacteria	1			Rhizobiales	0.97			Rhizobiales_incertae_sedis	0.89	Vasilyevaea	0.89
Otu263	0	0	0	0	0	0	0	0	0	0	0	0	0	0	0	0	0	0	0	0	0	0	0	0	0	0	0	0	0	0	n	Acidobacteria	1	Acidobacteria_Gp2	1									Gp2	1
Otu264	0	0	0	0	0	0	0	0	0	0	0	0	0	0	0	0	0	0	0	0	0	0	0	0	0	0	0	0	0	0	n	Actinobacteria	1	Actinobacteria	1	Rubrobacteridae	0.98	Gaiellales	0.87			Gaiellaceae	0.87	Gaiella	0.87
Otu265	0	0	0	0	1	0	0	0	0	0	0	0	0	0	0	0	0	0	0	3.67809e-05	0	0	0	0	0	0	0	0	0	0	n	Proteobacteria	0.97	Alphaproteobacteria	0.97			Rhodospirillales	0.83			Rhodospirillaceae	0.81	Lacibacterium	0.06
Otu266	0	0	0	0	0	0	0	0	0	0	0	0	0	0	0	0	0	0	0	0	0	0	0	0	0	0	0	0	0	0	n	Actinobacteria	1	Actinobacteria	1	Actinobacteridae	0.99	Actinomycetales	0.99	Propionibacterineae	0.71	Nocardioidaceae	0.71	Flindersiella	0.38
Otu267	0	0	0	0	0	0	0	0	0	0	0	0	0	0	0	0	0	0	0	0	0	0	0	0	0	0	0	0	0	0	n	Verrucomicrobia	1	Subdivision3	0.97									Subdivision3_genera_incertae_sedis	0.97
Otu268	0	0	0	0	0	0	0	0	0	0	0	0	0	0	0	0	0	0	0	0	0	0	0	0	0	0	0	0	0	0	n	Proteobacteria	1	Alphaproteobacteria	1			Rhizobiales	0.96			Xanthobacteraceae	0.38	Pseudoxanthobacter	0.28
Otu269	0	0	2	0	1	0	2	13	0	0	0	0	0	0	0	0	0	7.32279e-05	0	3.67809e-05	0	5.23533e-05	0.000333907	0	0	0	0	0	0	0	n	Proteobacteria	1	Alphaproteobacteria	1			Caulobacterales	1			Caulobacteraceae	1	Phenylobacterium	0.94
Otu270	0	0	0	0	0	0	0	0	0	0	0	0	0	0	0	0	0	0	0	0	0	0	0	0	0	0	0	0	0	0	n	Actinobacteria	0.77	Actinobacteria	0.77	Rubrobacteridae	0.66	Gaiellales	0.66			Gaiellaceae	0.66	Gaiella	0.66
Otu271	0	0	0	0	0	0	0	0	0	0	0	0	0	0	0	0	0	0	0	0	0	0	0	0	0	0	0	0	0	0	n	Proteobacteria	1	Gammaproteobacteria	0.66			Xanthomonadales	0.58			Sinobacteraceae	0.43	Hydrocarboniphaga	0.28
Otu272	0	0	0	0	0	0	0	0	0	0	0	0	0	0	0	0	0	0	0	0	0	0	0	0	0	0	0	0	0	0	n	Acidobacteria	1	Acidobacteria_Gp3	1									Candidatus Solibacter	0.96
Otu273	0	0	0	0	0	0	0	0	0	0	1	13	0	0	3	0	0	0	0	0	0	0	0	0	0	1.46841e-05	0.000308057	0	0	5.30926e-05	n	Firmicutes	1	Bacilli	1			Bacillales	1			Paenibacillaceae 1	1	Paenibacillus	0.99
Otu274	0	0	0	0	0	4	0	0	2	0	0	0	0	1	0	0	0	0	0	0	0.000170568	0	0	4.98058e-05	0	0	0	0	1.74095e-05	0	n	Actinobacteria	1	Actinobacteria	1	Actinobacteridae	1	Actinomycetales	1	Corynebacterineae	1	Mycobacteriaceae	1	Mycobacterium	1
Otu275	0	0	0	0	0	0	0	0	0	0	0	0	0	0	0	0	0	0	0	0	0	0	0	0	0	0	0	0	0	0	n	Proteobacteria	1	Deltaproteobacteria	0.97			Myxococcales	0.96	Nannocystineae	0.93	"Haliangiaceae"	0.7	Haliangium	0.7
Otu276	0	0	0	0	0	0	0	0	0	0	0	0	0	0	0	0	0	0	0	0	0	0	0	0	0	0	0	0	0	0	n	Proteobacteria	0.97	Alphaproteobacteria	0.91			Rhodospirillales	0.5			Rhodospirillaceae	0.48	Lacibacterium	0.07
Otu277	0	0	0	0	0	0	0	0	0	0	0	0	0	0	0	0	0	0	0	0	0	0	0	0	0	0	0	0	0	0	n	Acidobacteria	1	Acidobacteria_Gp1	0.99									Gp1	0.79
Otu278	0	0	0	2	0	6	0	10	39	1	0	0	0	0	0	0	0	0	5.29942e-05	0	0.000255853	0	0.000256852	0.000971212	2.0014e-05	0	0	0	0	0	n	Actinobacteria	1	Actinobacteria	1	Actinobacteridae	1	Actinomycetales	1	Propionibacterineae	1	Nocardioidaceae	1	Nocardioides	1
Otu279	0	0	0	1	0	0	0	0	0	0	0	0	0	0	0	0	0	0	2.64971e-05	0	0	0	0	0	0	0	0	0	0	0	n	Firmicutes	1	Bacilli	1			Bacillales	1			Bacillaceae 1	1	Bacillus	1
Otu280	0	0	0	0	0	0	0	0	0	0	0	0	0	0	0	0	0	0	0	0	0	0	0	0	0	0	0	0	0	0	n	Bacteroidetes	0.96	Sphingobacteriia	0.26			"Sphingobacteriales"	0.26			"Saprospiraceae"	0.18	Haliscomenobacter	0.1
Otu281	0	0	0	0	0	0	0	0	0	0	0	0	0	0	0	0	0	0	0	0	0	0	0	0	0	0	0	0	0	0	n	Proteobacteria	1	Betaproteobacteria	1			Sulfuricellales	0.32			Sulfuricellaceae	0.32	Sulfuricella	0.29
Otu282	0	0	0	0	0	0	0	0	0	0	0	0	0	0	0	0	0	0	0	0	0	0	0	0	0	0	0	0	0	0	n	Acidobacteria	0.98	Acidobacteria_Gp10	0.97									Gp10	0.97
Otu283	0	0	0	0	0	1	0	0	0	0	12	1	0	2	2	0	0	0	0	0	4.26421e-05	0	0	0	0	0.000176209	2.36967e-05	0	3.48189e-05	3.53951e-05	n	Actinobacteria	1	Actinobacteria	1	Actinobacteridae	1	Actinomycetales	1	Propionibacterineae	0.99	Nocardioidaceae	0.99	Marmoricola	0.98
Otu284	0	0	0	0	0	46	0	0	0	0	0	0	0	0	0	0	0	0	0	0	0.00196154	0	0	0	0	0	0	0	0	0	n	Proteobacteria	1	Alphaproteobacteria	1			Rhodospirillales	1			Rhodospirillaceae	1	Dongia	0.84
Otu285	0	0	0	0	0	0	0	0	0	0	0	0	0	0	0	0	0	0	0	0	0	0	0	0	0	0	0	0	0	0	n	Proteobacteria	1	Deltaproteobacteria	1			Bdellovibrionales	1			Bdellovibrionaceae	1	Bdellovibrio	1
Otu286	0	0	0	0	0	0	0	0	0	2	0	0	0	0	0	0	0	0	0	0	0	0	0	0	4.0028e-05	0	0	0	0	0	n	Proteobacteria	1	Alphaproteobacteria	1			Rhodospirillales	1			Acetobacteraceae	0.91	Acidisphaera	0.41
Otu287	0	0	0	0	0	0	0	0	0	0	0	0	0	0	0	0	0	0	0	0	0	0	0	0	0	0	0	0	0	0	n	Proteobacteria	1	Alphaproteobacteria	1			Rhizobiales	1			Xanthobacteraceae	0.46	Pseudolabrys	0.44
Otu288	0	0	0	0	0	0	0	0	0	0	0	0	0	0	0	0	0	0	0	0	0	0	0	0	0	0	0	0	0	0	n	Verrucomicrobia	1	Subdivision3	1									Subdivision3_genera_incertae_sedis	1
Otu289	0	0	0	0	0	0	0	0	0	0	0	0	0	0	0	0	0	0	0	0	0	0	0	0	0	0	0	0	0	0	n	Actinobacteria	1	Actinobacteria	1	Actinobacteridae	1	Actinomycetales	1	Pseudonocardineae	0.94	Pseudonocardiaceae	0.94	Actinophytocola	0.26
Otu29	0	43	8	0	31	32	10	0	0	5	22	0	5	14	5	0	0.00181887	0.000292912	0	0.00114021	0.00136455	0.000261766	0	0	0.00010007	0.00032305	0	9.43645e-05	0.000243733	8.84877e-05	n	Proteobacteria	1	Alphaproteobacteria	1			Rhizobiales	1			Bradyrhizobiaceae	1	Bradyrhizobium	1
Otu290	0	0	0	0	0	0	0	0	0	0	0	0	0	0	0	0	0	0	0	0	0	0	0	0	0	0	0	0	0	0	n	Acidobacteria	1	Acidobacteria_Gp3	1									Bryobacter	0.65
Otu291	0	0	0	0	0	0	0	0	0	0	0	0	0	0	0	0	0	0	0	0	0	0	0	0	0	0	0	0	0	0	n	Proteobacteria	1	Alphaproteobacteria	1			Rhizobiales	0.99			Methylobacteriaceae	0.85	Microvirga	0.83
Otu292	0	0	0	0	0	0	0	0	0	0	0	0	0	0	0	0	0	0	0	0	0	0	0	0	0	0	0	0	0	0	n	Proteobacteria	1	Gammaproteobacteria	1			Xanthomonadales	1			Xanthomonadaceae	1	Arenimonas	0.97
Otu293	0	0	0	0	0	0	0	0	0	0	0	0	0	0	0	0	0	0	0	0	0	0	0	0	0	0	0	0	0	0	n	Proteobacteria	1	Alphaproteobacteria	1			Rhodospirillales	0.99			Rhodospirillaceae	0.93	Dongia	0.61
Otu294	0	0	0	0	0	0	0	0	0	0	0	0	0	0	0	0	0	0	0	0	0	0	0	0	0	0	0	0	0	0	n	Verrucomicrobia	1	Subdivision3	1									Subdivision3_genera_incertae_sedis	1
Otu295	0	0	0	0	0	0	0	0	0	0	0	0	0	0	0	0	0	0	0	0	0	0	0	0	0	0	0	0	0	0	n	Chloroflexi	0.45	Thermoflexia	0.39			Thermoflexales	0.39			Thermoflexaceae	0.39	Thermoflexus	0.39
Otu296	0	0	0	0	0	0	0	0	0	0	0	0	0	0	0	0	0	0	0	0	0	0	0	0	0	0	0	0	0	0	n	Proteobacteria	1	Alphaproteobacteria	1			Rhizobiales	0.99			Methylobacteriaceae	0.32	Psychroglaciecola	0.31
Otu297	0	0	0	0	0	0	0	0	0	0	0	0	0	0	0	0	0	0	0	0	0	0	0	0	0	0	0	0	0	0	n	Acidobacteria	1	Acidobacteria_Gp1	1									Terriglobus	0.37
Otu298	0	0	0	0	0	0	0	0	0	0	0	0	0	0	0	0	0	0	0	0	0	0	0	0	0	0	0	0	0	0	n	Acidobacteria	1	Acidobacteria_Gp1	0.99									Gp1	0.34
Otu299	0	0	0	0	0	0	0	0	0	0	0	0	0	0	0	0	0	0	0	0	0	0	0	0	0	0	0	0	0	0	n	Bacteroidetes	1	Bacteroidia	0.16			"Bacteroidales"	0.16			"Rikenellaceae"	0.16	Mucinivorans	0.14
Otu300	0	0	0	0	0	0	0	0	0	0	0	0	0	0	0	0	0	0	0	0	0	0	0	0	0	0	0	0	0	0	n	Acidobacteria	1	Acidobacteria_Gp3	1									Gp3	0.79
Otu301	0	0	0	0	0	0	0	0	0	0	0	0	0	0	0	0	0	0	0	0	0	0	0	0	0	0	0	0	0	0	n	Acidobacteria	1	Acidobacteria_Gp3	1									Gp3	0.56
Otu302	0	35	0	0	0	0	0	0	0	0	0	0	0	0	0	0	0.00148048	0	0	0	0	0	0	0	0	0	0	0	0	0	n	Proteobacteria	1	Betaproteobacteria	1			Methylophilales	1			Methylophilaceae	1	Methylobacillus	0.67
Otu303	0	0	0	0	0	0	0	0	0	0	0	0	0	0	0	0	0	0	0	0	0	0	0	0	0	0	0	0	0	0	n	Proteobacteria	0.99	Alphaproteobacteria	0.99			Sneathiellales	0.42			Sneathiellaceae	0.42	Ferrovibrio	0.36
Otu304	0	0	0	0	0	0	0	0	0	0	0	0	0	0	0	0	0	0	0	0	0	0	0	0	0	0	0	0	0	0	n	Planctomycetes	0.47	Planctomycetia	0.47			Candidatus Brocadiales	0.46			Candidatus Brocadiaceae	0.46	Candidatus Brocadia	0.29
Otu305	0	0	0	0	0	0	0	0	0	0	0	0	0	0	0	0	0	0	0	0	0	0	0	0	0	0	0	0	0	0	n	Bacteroidetes	0.32	Cytophagia	0.19			Cytophagales	0.19			Cytophagaceae	0.15	Microscilla	0.07
Otu306	0	0	0	0	0	1	0	0	0	0	0	0	0	0	0	0	0	0	0	0	4.26421e-05	0	0	0	0	0	0	0	0	0	n	Proteobacteria	1	Alphaproteobacteria	1			Sphingomonadales	1			Sphingomonadaceae	0.76	Novosphingobium	0.7
Otu307	0	0	0	0	0	23	8	23	3	7	0	0	0	0	0	0	0	0	0	0	0.000980768	0.000209413	0.000590758	7.47086e-05	0.000140098	0	0	0	0	0	n	Proteobacteria	1	Alphaproteobacteria	1			Rhizobiales	1			Bradyrhizobiaceae	1	Afipia	0.81
Otu308	0	0	0	0	0	0	0	0	0	0	0	0	0	0	0	0	0	0	0	0	0	0	0	0	0	0	0	0	0	0	n	Actinobacteria	0.92	Actinobacteria	0.88	Acidimicrobidae	0.24	Acidimicrobiales	0.24	"Acidimicrobineae"	0.24	"Acidimicrobineae"_incertae_sedis	0.23	Aciditerrimonas	0.23
Otu309	0	0	0	0	0	0	0	0	0	0	0	0	0	0	0	0	0	0	0	0	0	0	0	0	0	0	0	0	0	0	n	Firmicutes	0.66	Clostridia	0.59			Clostridiales	0.57			Clostridiaceae 1	0.45	Proteiniclasticum	0.39
Otu31	5	1	9	1	1	0	0	0	0	0	0	0	0	0	0	0.000142361	4.22994e-05	0.000329525	2.64971e-05	3.67809e-05	0	0	0	0	0	0	0	0	0	0	n	Proteobacteria	1	Alphaproteobacteria	0.99			Caulobacterales	0.82			Caulobacteraceae	0.59	Caulobacter	0.32
Otu310	0	0	0	0	0	0	0	0	0	0	0	0	0	0	0	0	0	0	0	0	0	0	0	0	0	0	0	0	0	0	n	Proteobacteria	1	Alphaproteobacteria	1			Rhodospirillales	1			Acetobacteraceae	0.95	Acidisphaera	0.58
Otu311	0	0	0	0	0	0	0	0	0	0	0	0	0	0	0	0	0	0	0	0	0	0	0	0	0	0	0	0	0	0	n	Actinobacteria	1	Actinobacteria	1	Rubrobacteridae	1	Solirubrobacterales	1			Solirubrobacteraceae	0.55	Solirubrobacter	0.55
Otu312	0	0	0	0	0	4	0	0	0	0	0	0	0	0	0	0	0	0	0	0	0.000170568	0	0	0	0	0	0	0	0	0	n	Actinobacteria	1	Actinobacteria	1	Actinobacteridae	1	Actinomycetales	1	Micrococcineae	1	Microbacteriaceae	1	Galbitalea	0.42
Otu313	0	0	0	0	0	0	0	0	0	0	0	0	0	0	0	0	0	0	0	0	0	0	0	0	0	0	0	0	0	0	n	Planctomycetes	0.59	Phycisphaerae	0.19			Phycisphaerales	0.17			Phycisphaeraceae	0.17	Phycisphaera	0.17
Otu314	0	0	0	0	0	0	0	0	0	0	0	0	0	0	0	0	0	0	0	0	0	0	0	0	0	0	0	0	0	0	n	Acidobacteria	1	Acidobacteria_Gp3	1									Candidatus Solibacter	0.83
Otu315	0	0	0	0	0	0	0	0	0	0	0	0	0	0	0	0	0	0	0	0	0	0	0	0	0	0	0	0	0	0	n	Proteobacteria	1	Betaproteobacteria	1			Sulfuricellales	0.48			Sulfuricellaceae	0.48	Sulfuriferula	0.48
Otu316	0	0	0	0	0	0	0	0	0	0	0	0	0	0	0	0	0	0	0	0	0	0	0	0	0	0	0	0	0	0	n	Actinobacteria	1	Actinobacteria	1	Actinobacteridae	1	Actinomycetales	1	Frankineae	1	Geodermatophilaceae	1	Geodermatophilus	0.81
Otu317	0	0	0	0	0	0	0	0	0	0	0	0	0	0	0	0	0	0	0	0	0	0	0	0	0	0	0	0	0	0	n	Actinobacteria	0.9	Actinobacteria	0.9	Rubrobacteridae	0.48	Gaiellales	0.44			Gaiellaceae	0.44	Gaiella	0.44
Otu318	0	0	0	0	0	0	0	0	0	0	0	0	0	0	0	0	0	0	0	0	0	0	0	0	0	0	0	0	0	0	n	Chloroflexi	0.55	Anaerolineae	0.32			Anaerolineales	0.32			Anaerolineaceae	0.32	Longilinea	0.3
Otu319	0	0	0	0	0	0	0	0	0	0	0	0	0	0	0	0	0	0	0	0	0	0	0	0	0	0	0	0	0	0	n	Actinobacteria	1	Actinobacteria	0.95	Rubrobacteridae	0.94	Gaiellales	0.86			Gaiellaceae	0.86	Gaiella	0.86
Otu32	0	0	0	0	0	0	0	0	0	0	0	0	0	0	0	0	0	0	0	0	0	0	0	0	0	0	0	0	0	0	n	Acidobacteria	1	Acidobacteria_Gp2	1									Gp2	1
Otu320	0	0	0	0	0	0	0	0	0	0	0	0	0	0	0	0	0	0	0	0	0	0	0	0	0	0	0	0	0	0	n	Proteobacteria	1	Gammaproteobacteria	1			Xanthomonadales	1			Xanthomonadaceae	1	Oleiagrimonas	0.34
Otu321	0	0	0	0	2	0	0	1	0	0	0	0	0	0	0	0	0	0	0	7.35619e-05	0	0	2.56852e-05	0	0	0	0	0	0	0	n	Firmicutes	1	Bacilli	1			Bacillales	1			Bacillaceae 1	0.93	Bacillus	0.91
Otu322	0	0	0	0	0	0	0	0	0	0	0	0	0	0	0	0	0	0	0	0	0	0	0	0	0	0	0	0	0	0	n	Planctomycetes	0.83	Phycisphaerae	0.61			Phycisphaerales	0.49			Phycisphaeraceae	0.49	Phycisphaera	0.49
Otu323	0	0	0	0	0	0	0	0	0	0	0	0	0	0	0	0	0	0	0	0	0	0	0	0	0	0	0	0	0	0	n	Bacteroidetes	1	Sphingobacteriia	0.72			"Sphingobacteriales"	0.72			"Saprospiraceae"	0.58	Haliscomenobacter	0.27
Otu324	0	0	0	0	0	0	0	0	0	0	0	0	0	0	0	0	0	0	0	0	0	0	0	0	0	0	0	0	0	0	n	Proteobacteria	1	Alphaproteobacteria	1			Rhodospirillales	1			Acetobacteraceae	1	Gluconacetobacter	0.26
Otu325	0	0	0	0	0	0	0	0	0	1	0	0	0	0	0	0	0	0	0	0	0	0	0	0	2.0014e-05	0	0	0	0	0	n	Actinobacteria	1	Actinobacteria	1	Rubrobacteridae	1	Solirubrobacterales	1			Solirubrobacteraceae	1	Solirubrobacter	1
Otu326	0	0	0	0	0	0	0	0	0	0	0	0	0	0	0	0	0	0	0	0	0	0	0	0	0	0	0	0	0	0	n	Bacteroidetes	1	Cytophagia	0.48			Cytophagales	0.48					Chryseolinea	0.39
Otu327	0	0	0	0	0	0	0	0	0	0	0	0	0	0	0	0	0	0	0	0	0	0	0	0	0	0	0	0	0	0	n	Actinobacteria	1	Actinobacteria	1	Rubrobacteridae	1	Solirubrobacterales	1			Solirubrobacteraceae	0.8	Solirubrobacter	0.8
Otu328	0	0	0	0	0	0	0	0	0	0	0	0	0	0	0	0	0	0	0	0	0	0	0	0	0	0	0	0	0	0	n	Planctomycetes	0.84	Phycisphaerae	0.46			Tepidisphaerales	0.17			Tepidisphaeraceae	0.17	Tepidisphaera	0.17
Otu329	0	0	0	0	0	0	0	0	0	0	0	0	0	0	0	0	0	0	0	0	0	0	0	0	0	0	0	0	0	0	n	Proteobacteria	1	Alphaproteobacteria	1			Caulobacterales	0.98			Caulobacteraceae	0.98	Asticcacaulis	0.98
Otu33	1	0	1	0	0	57	0	205	9	3	7	202	1	1	0	2.84722e-05	0	3.66139e-05	0	0	0.0024306	0	0.00526546	0.000224126	6.0042e-05	0.000102789	0.00478673	1.88729e-05	1.74095e-05	0	n	Proteobacteria	1	Betaproteobacteria	0.92			Burkholderiales	0.92			Burkholderiales_incertae_sedis	0.64	Ideonella	0.59
Otu330	0	0	0	0	0	0	0	0	0	0	0	0	0	0	0	0	0	0	0	0	0	0	0	0	0	0	0	0	0	0	n	Acidobacteria	1	Acidobacteria_Gp5	1									Gp5	1
Otu331	0	0	0	0	0	0	0	0	0	0	0	0	0	0	0	0	0	0	0	0	0	0	0	0	0	0	0	0	0	0	n	Chloroflexi	0.39	Ardenticatenia	0.08			Ardenticatenales	0.08			Ardenticatenaceae	0.08	Ardenticatena	0.08
Otu332	0	0	0	0	0	0	0	0	0	0	0	0	0	0	0	0	0	0	0	0	0	0	0	0	0	0	0	0	0	0	n	Armatimonadetes	1	Armatimonadia	1			Armatimonadales	1			Armatimonadaceae	1	Armatimonas/Armatimonadetes_gp1	1
Otu333	0	0	0	0	0	0	0	0	0	0	0	0	0	0	0	0	0	0	0	0	0	0	0	0	0	0	0	0	0	0	n	Proteobacteria	1	Alphaproteobacteria	1			Rhizobiales	1			Rhizobiales_incertae_sedis	0.87	Bauldia	0.86
Otu334	0	0	0	0	0	0	0	0	0	0	0	0	0	0	0	0	0	0	0	0	0	0	0	0	0	0	0	0	0	0	n	Planctomycetes	0.71	Phycisphaerae	0.55			Phycisphaerales	0.5			Phycisphaeraceae	0.5	Phycisphaera	0.5
Otu335	0	0	0	0	0	1	0	0	0	0	0	0	0	0	0	0	0	0	0	0	4.26421e-05	0	0	0	0	0	0	0	0	0	n	Proteobacteria	0.96	Deltaproteobacteria	0.95			Bdellovibrionales	0.92			Bdellovibrionaceae	0.92	Bdellovibrio	0.92
Otu336	0	0	0	0	0	1	0	0	0	0	0	0	0	0	0	0	0	0	0	0	4.26421e-05	0	0	0	0	0	0	0	0	0	n	Proteobacteria	1	Alphaproteobacteria	1			Rhizobiales	1			Methylobacteriaceae	1	Methylobacterium	1
Otu337	0	0	0	0	0	0	0	0	0	0	0	0	0	0	0	0	0	0	0	0	0	0	0	0	0	0	0	0	0	0	n	Proteobacteria	1	Gammaproteobacteria	1			Xanthomonadales	0.82			Sinobacteraceae	0.82	Povalibacter	0.39
Otu338	0	0	0	0	0	0	0	0	0	0	0	0	0	0	0	0	0	0	0	0	0	0	0	0	0	0	0	0	0	0	n	Actinobacteria	1	Actinobacteria	1	Acidimicrobidae	1	Acidimicrobiales	1	"Acidimicrobineae"	1	Acidimicrobiaceae	1	Ilumatobacter	1
Otu339	0	0	0	0	0	0	0	0	0	0	0	0	0	0	0	0	0	0	0	0	0	0	0	0	0	0	0	0	0	0	n	Proteobacteria	1	Betaproteobacteria	0.99			Sulfuricellales	0.46			Sulfuricellaceae	0.46	Sulfuriferula	0.44
Otu34	62	416	53	15	104	0	0	0	0	0	0	0	0	0	0	0.00176528	0.0175965	0.00194054	0.000397456	0.00382522	0	0	0	0	0	0	0	0	0	0	n	Proteobacteria	1	Alphaproteobacteria	0.97			Sphingomonadales	0.97			Sphingomonadaceae	0.96	Sphingobium	0.8
Otu340	0	0	0	0	0	0	0	0	0	0	0	0	0	0	0	0	0	0	0	0	0	0	0	0	0	0	0	0	0	0	n	Proteobacteria	1	Alphaproteobacteria	1			Rhizobiales	0.8			Hyphomicrobiaceae	0.51	Prosthecomicrobium	0.48
Otu341	0	0	0	0	0	0	0	0	1	0	0	0	0	0	0	0	0	0	0	0	0	0	0	2.49029e-05	0	0	0	0	0	0	n	Acidobacteria	0.98	Acidobacteria_Gp1	0.98									Gp1	0.37
Otu342	0	0	0	0	0	0	0	0	0	0	0	0	0	0	0	0	0	0	0	0	0	0	0	0	0	0	0	0	0	0	n	Chloroflexi	0.47	Ardenticatenia	0.13			Ardenticatenales	0.13			Ardenticatenaceae	0.13	Ardenticatena	0.13
Otu343	0	0	0	0	0	0	0	0	0	0	0	0	0	0	0	0	0	0	0	0	0	0	0	0	0	0	0	0	0	0	n	Actinobacteria	1	Actinobacteria	1	Actinobacteridae	1	Actinomycetales	1	Propionibacterineae	0.93	Nocardioidaceae	0.91	Flindersiella	0.46
Otu344	0	0	0	0	0	0	0	0	0	0	0	0	0	0	0	0	0	0	0	0	0	0	0	0	0	0	0	0	0	0	n	Firmicutes	0.99	Bacilli	0.88			Bacillales	0.84			Bacillaceae 2	0.24	Tuberibacillus	0.11
Otu345	0	0	0	0	0	0	0	0	0	0	0	0	0	0	0	0	0	0	0	0	0	0	0	0	0	0	0	0	0	0	n	Actinobacteria	1	Actinobacteria	1	Actinobacteridae	1	Actinomycetales	1	Kineosporiineae	1	Kineosporiaceae	1	Kineococcus	1
Otu346	0	0	0	0	0	0	0	0	0	0	0	0	0	0	0	0	0	0	0	0	0	0	0	0	0	0	0	0	0	0	n	Acidobacteria	0.98	Acidobacteria_Gp1	0.98									Gp1	0.76
Otu347	0	0	0	0	0	0	0	0	0	0	0	0	0	0	0	0	0	0	0	0	0	0	0	0	0	0	0	0	0	0	n	Actinobacteria	1	Actinobacteria	1	Acidimicrobidae	1	Acidimicrobiales	1	"Acidimicrobineae"	1	Acidimicrobiaceae	1	Ilumatobacter	1
Otu348	0	0	0	0	0	0	0	0	0	0	0	0	0	0	0	0	0	0	0	0	0	0	0	0	0	0	0	0	0	0	n	Actinobacteria	1	Actinobacteria	1	Acidimicrobidae	0.74	Acidimicrobiales	0.74	"Acidimicrobineae"	0.74	Iamiaceae	0.53	Aquihabitans	0.3
Otu349	0	0	0	0	0	0	0	0	0	0	0	0	0	0	0	0	0	0	0	0	0	0	0	0	0	0	0	0	0	0	n	Proteobacteria	1	Alphaproteobacteria	1			Rhizobiales	1			Beijerinckiaceae	0.24	Chelatococcus	0.15
Otu35	0	1	5	0	0	0	0	0	0	0	0	0	0	0	0	0	4.22994e-05	0.00018307	0	0	0	0	0	0	0	0	0	0	0	0	n	Proteobacteria	1	Betaproteobacteria	1			Burkholderiales	1			Comamonadaceae	0.91	Ramlibacter	0.86
Otu350	0	0	0	0	0	0	0	0	0	0	0	0	0	0	0	0	0	0	0	0	0	0	0	0	0	0	0	0	0	0	n	Acidobacteria	1	Acidobacteria_Gp1	1									Acidobacterium	0.33
Otu351	0	0	0	0	0	0	0	0	0	0	0	0	0	0	0	0	0	0	0	0	0	0	0	0	0	0	0	0	0	0	n	Acidobacteria	1	Acidobacteria_Gp3	1									Candidatus Solibacter	0.59
Otu352	0	1	0	0	0	92	117	56	108	75	0	0	0	0	1	0	4.22994e-05	0	0	0	0.00392307	0.00306267	0.00143837	0.00268951	0.00150105	0	0	0	0	1.76975e-05	n	Proteobacteria	1	Alphaproteobacteria	0.83			Rhizobiales	0.74			Rhizobiaceae	0.51	Neorhizobium	0.49
Otu353	0	0	0	0	0	0	0	0	0	0	0	0	0	0	0	0	0	0	0	0	0	0	0	0	0	0	0	0	0	0	n	Proteobacteria	1	Betaproteobacteria	1			Burkholderiales	0.99			Oxalobacteraceae	0.78	Oxalicibacterium	0.65
Otu354	0	0	0	0	0	0	0	0	0	0	0	0	0	0	0	0	0	0	0	0	0	0	0	0	0	0	0	0	0	0	n	Proteobacteria	1	Alphaproteobacteria	1			Caulobacterales	1			Caulobacteraceae	1	Caulobacter	0.99
Otu355	0	0	0	0	0	0	0	0	0	0	0	0	0	0	0	0	0	0	0	0	0	0	0	0	0	0	0	0	0	0	n	Acidobacteria	1	Acidobacteria_Gp3	1									Candidatus Solibacter	1
Otu356	0	0	0	0	0	0	0	0	0	0	0	0	0	0	0	0	0	0	0	0	0	0	0	0	0	0	0	0	0	0	n	Acidobacteria	1	Acidobacteria_Gp7	1									Gp7	1
Otu357	0	0	0	0	0	0	0	11	0	0	4	0	0	0	0	0	0	0	0	0	0	0	0.000282537	0	0	5.87363e-05	0	0	0	0	n	Proteobacteria	1	Betaproteobacteria	1			Burkholderiales	1			Alcaligenaceae	0.99	Pigmentiphaga	0.89
Otu358	0	0	0	0	0	0	0	0	0	0	0	0	0	0	0	0	0	0	0	0	0	0	0	0	0	0	0	0	0	0	n	Proteobacteria	0.83	Deltaproteobacteria	0.66			Bdellovibrionales	0.27			Bdellovibrionaceae	0.27	Bdellovibrio	0.27
Otu359	0	0	0	0	0	0	0	0	0	0	0	0	0	0	0	0	0	0	0	0	0	0	0	0	0	0	0	0	0	0	n	Acidobacteria	1	Acidobacteria_Gp2	1									Gp2	1
Otu36	19	3	0	0	0	4	175	666	314	0	2	0	0	1	1	0.000540971	0.000126898	0	0	0	0.000170568	0.00458091	0.0171063	0.0078195	0	2.93681e-05	0	0	1.74095e-05	1.76975e-05	n	Proteobacteria	1	Alphaproteobacteria	1			Rhizobiales	1			Rhizobiaceae	0.86	Neorhizobium	0.46
Otu360	0	0	0	0	0	0	0	0	0	0	0	0	0	0	0	0	0	0	0	0	0	0	0	0	0	0	0	0	0	0	n	Proteobacteria	0.96	Alphaproteobacteria	0.89			Rickettsiales	0.88			Rickettsiaceae	0.76	Orientia	0.75
Otu361	0	0	0	4	2	0	13	25	250	1	2	6	0	0	0	0	0	0	0.000105988	7.35619e-05	0	0.000340296	0.000642129	0.00622572	2.0014e-05	2.93681e-05	0.00014218	0	0	0	n	Actinobacteria	1	Actinobacteria	1	Actinobacteridae	1	Actinomycetales	1	Micrococcineae	1	Microbacteriaceae	1	Microbacterium	1
Otu362	0	0	0	0	0	0	0	0	0	0	0	0	0	0	0	0	0	0	0	0	0	0	0	0	0	0	0	0	0	0	n	Acidobacteria	1	Acidobacteria_Gp2	0.99									Gp2	0.99
Otu363	0	0	0	0	0	0	0	0	0	0	0	0	0	0	0	0	0	0	0	0	0	0	0	0	0	0	0	0	0	0	n	Verrucomicrobia	1	Subdivision3	0.99									Subdivision3_genera_incertae_sedis	0.99
Otu364	0	0	0	0	0	0	0	0	0	0	0	0	0	0	0	0	0	0	0	0	0	0	0	0	0	0	0	0	0	0	n	Proteobacteria	1	Alphaproteobacteria	1			Rhodospirillales	1			Acetobacteraceae	1	Roseomonas	0.35
Otu365	0	0	0	0	0	0	0	0	0	0	0	0	0	0	0	0	0	0	0	0	0	0	0	0	0	0	0	0	0	0	n	Proteobacteria	1	Betaproteobacteria	1			Sulfuricellales	0.78			Sulfuricellaceae	0.78	Sulfuriferula	0.78
Otu366	0	0	0	0	0	8	1	0	6	0	0	0	0	0	0	0	0	0	0	0	0.000341137	2.61766e-05	0	0.000149417	0	0	0	0	0	0	n	Proteobacteria	1	Alphaproteobacteria	1			Sphingomonadales	1			Sphingomonadaceae	0.97	Sphingopyxis	0.37
Otu367	0	0	0	0	0	0	0	0	0	0	0	0	0	0	0	0	0	0	0	0	0	0	0	0	0	0	0	0	0	0	n	Planctomycetes	0.76	Planctomycetia	0.45			Planctomycetales	0.45			Planctomycetaceae	0.45	Schlesneria	0.16
Otu368	0	0	0	0	0	0	0	0	0	0	0	0	0	0	0	0	0	0	0	0	0	0	0	0	0	0	0	0	0	0	n	Acidobacteria	0.24	Acidobacteria_Gp23	0.13									Thermoanaerobaculum	0.13
Otu369	0	0	0	0	0	0	0	0	0	0	0	0	0	0	0	0	0	0	0	0	0	0	0	0	0	0	0	0	0	0	n	Proteobacteria	1	Alphaproteobacteria	1			Rhizobiales	0.99			Xanthobacteraceae	0.8	Pseudolabrys	0.77
Otu37	0	1	0	0	0	0	0	0	0	0	2	0	0	0	0	0	4.22994e-05	0	0	0	0	0	0	0	0	2.93681e-05	0	0	0	0	n	Proteobacteria	1	Betaproteobacteria	1			Burkholderiales	1			Comamonadaceae	1	Ramlibacter	0.91
Otu370	0	0	0	0	0	0	0	0	0	0	0	0	0	0	0	0	0	0	0	0	0	0	0	0	0	0	0	0	0	0	n	Proteobacteria	0.99	Deltaproteobacteria	0.97			Myxococcales	0.89	Sorangiineae	0.67	Phaselicystidaceae	0.52	Phaselicystis	0.52
Otu371	0	0	0	0	0	0	0	0	0	0	0	0	0	0	0	0	0	0	0	0	0	0	0	0	0	0	0	0	0	0	n	Actinobacteria	1	Actinobacteria	1	Actinobacteridae	1	Actinomycetales	1	Frankineae	0.23	Cryptosporangiaceae	0.23	Fodinicola	0.21
Otu372	0	0	0	0	0	0	0	0	0	0	0	0	0	0	0	0	0	0	0	0	0	0	0	0	0	0	0	0	0	0	n	Gemmatimonadetes	0.79	Gemmatimonadetes	0.79			Gemmatimonadales	0.79			Gemmatimonadaceae	0.79	Gemmatimonas	0.79
Otu373	0	0	0	0	0	0	0	0	0	0	0	0	0	0	0	0	0	0	0	0	0	0	0	0	0	0	0	0	0	0	n	Actinobacteria	1	Actinobacteria	1	Actinobacteridae	1	Actinomycetales	1	Kineosporiineae	0.95	Kineosporiaceae	0.95	Kineosporia	0.92
Otu374	0	0	0	0	0	0	0	0	0	0	0	0	0	0	0	0	0	0	0	0	0	0	0	0	0	0	0	0	0	0	n	Bacteroidetes	0.99	Sphingobacteriia	0.88			"Sphingobacteriales"	0.88			Sphingobacteriaceae	0.82	Solitalea	0.82
Otu375	0	0	0	0	0	0	0	0	0	0	0	0	0	0	0	0	0	0	0	0	0	0	0	0	0	0	0	0	0	0	n	Proteobacteria	1	Alphaproteobacteria	1			Rhodospirillales	1			Acetobacteraceae	1	Roseomonas	0.78
Otu376	0	0	0	0	0	0	0	0	0	0	0	0	0	0	0	0	0	0	0	0	0	0	0	0	0	0	0	0	0	0	n	Proteobacteria	1	Alphaproteobacteria	1			Rhodospirillales	1			Acetobacteraceae	1	Roseococcus	0.97
Otu377	0	0	0	0	0	0	0	0	0	0	0	0	0	0	0	0	0	0	0	0	0	0	0	0	0	0	0	0	0	0	n	Proteobacteria	1	Alphaproteobacteria	1			Rhizobiales	0.99			Hyphomicrobiaceae	0.51	Ancalomicrobium	0.37
Otu378	0	0	0	0	0	0	0	0	0	0	0	0	0	0	0	0	0	0	0	0	0	0	0	0	0	0	0	0	0	0	n	Proteobacteria	1	Alphaproteobacteria	1			Sphingomonadales	1			Sphingomonadaceae	0.92	Novosphingobium	0.91
Otu379	0	0	0	0	0	0	0	0	0	0	0	0	0	0	0	0	0	0	0	0	0	0	0	0	0	0	0	0	0	0	n	Firmicutes	1	Bacilli	1			Bacillales	1			Bacillaceae 1	0.77	Bacillus	0.3
Otu38	0	0	0	0	0	0	0	0	0	0	0	0	0	0	0	0	0	0	0	0	0	0	0	0	0	0	0	0	0	0	n	Firmicutes	1	Bacilli	1			Bacillales	1			Bacillaceae 1	1	Bacillus	1
Otu380	0	0	0	0	0	0	0	0	0	0	0	0	0	0	0	0	0	0	0	0	0	0	0	0	0	0	0	0	0	0	n	Acidobacteria	1	Acidobacteria_Gp1	1									Candidatus Koribacter	0.63
Otu381	0	0	0	0	0	0	0	0	0	0	0	0	0	0	0	0	0	0	0	0	0	0	0	0	0	0	0	0	0	0	n	Proteobacteria	0.76	Alphaproteobacteria	0.6			Rickettsiales	0.49			Anaplasmataceae	0.24	Anaplasma	0.16
Otu382	0	0	0	0	0	0	0	0	0	0	0	0	0	0	0	0	0	0	0	0	0	0	0	0	0	0	0	0	0	0	n	Acidobacteria	1	Acidobacteria_Gp1	1									Gp1	0.47
Otu383	0	0	0	0	0	0	0	0	0	0	0	0	0	0	0	0	0	0	0	0	0	0	0	0	0	0	0	0	0	0	n	Proteobacteria	0.89	Deltaproteobacteria	0.89			Syntrophobacterales	0.75			Syntrophobacteraceae	0.66	Desulfoglaeba	0.62
Otu384	0	0	0	0	0	0	0	0	0	0	0	0	0	0	0	0	0	0	0	0	0	0	0	0	0	0	0	0	0	0	n	Proteobacteria	1	Alphaproteobacteria	0.94			Sphingomonadales	0.94			Sphingomonadaceae	0.6	Novosphingobium	0.55
Otu385	0	0	0	0	0	0	0	0	0	0	0	0	0	0	0	0	0	0	0	0	0	0	0	0	0	0	0	0	0	0	n	Proteobacteria	1	Betaproteobacteria	1			Sulfuricellales	0.57			Sulfuricellaceae	0.57	Sulfuriferula	0.54
Otu386	0	0	0	0	0	0	0	0	0	0	0	0	0	0	0	0	0	0	0	0	0	0	0	0	0	0	0	0	0	0	n	Proteobacteria	1	Betaproteobacteria	1			Hydrogenophilales	0.42			Hydrogenophilaceae	0.42	Thiobacillus	0.42
Otu387	0	0	0	0	0	0	0	0	0	0	0	0	0	0	0	0	0	0	0	0	0	0	0	0	0	0	0	0	0	0	n	Actinobacteria	1	Actinobacteria	1	Actinobacteridae	1	Actinomycetales	1	Micrococcineae	1	Micrococcaceae	1	Arthrobacter	0.73
Otu388	0	0	0	0	0	0	0	0	0	0	0	0	0	0	0	0	0	0	0	0	0	0	0	0	0	0	0	0	0	0	n	Proteobacteria	1	Alphaproteobacteria	1			Rhodospirillales	1			Acetobacteraceae	1	Paracraurococcus	0.88
Otu389	0	0	0	0	0	0	0	0	0	0	0	0	0	0	0	0	0	0	0	0	0	0	0	0	0	0	0	0	0	0	n	Actinobacteria	0.92	Actinobacteria	0.77	Rubrobacteridae	0.67	Solirubrobacterales	0.66			Conexibacteraceae	0.62	Conexibacter	0.62
Otu39	0	0	0	0	0	0	0	0	0	0	0	0	0	0	0	0	0	0	0	0	0	0	0	0	0	0	0	0	0	0	n	Acidobacteria	1	Acidobacteria_Gp2	1									Gp2	1
Otu390	0	0	0	0	0	0	0	0	0	0	0	0	0	0	0	0	0	0	0	0	0	0	0	0	0	0	0	0	0	0	n	Verrucomicrobia	1	Subdivision3	1									Subdivision3_genera_incertae_sedis	0.9
Otu391	0	0	0	0	0	0	0	0	0	0	0	0	0	19	0	0	0	0	0	0	0	0	0	0	0	0	0	0	0.00033078	0	n	Proteobacteria	0.88	Gammaproteobacteria	0.61			Legionellales	0.35			Coxiellaceae	0.35	Diplorickettsia	0.34
Otu392	0	0	0	0	0	0	0	0	0	0	0	0	0	0	0	0	0	0	0	0	0	0	0	0	0	0	0	0	0	0	n	Acidobacteria	1	Acidobacteria_Gp1	1									Acidobacterium	0.67
Otu393	0	0	0	0	0	0	0	0	0	0	0	0	0	0	0	0	0	0	0	0	0	0	0	0	0	0	0	0	0	0	n	Actinobacteria	1	Actinobacteria	1	Actinobacteridae	1	Actinomycetales	1	Micrococcineae	1	Microbacteriaceae	1	Agromyces	1
Otu394	0	0	0	0	0	0	0	0	0	0	0	0	0	0	0	0	0	0	0	0	0	0	0	0	0	0	0	0	0	0	n	Acidobacteria	1	Acidobacteria_Gp3	1									Bryobacter	0.5
Otu395	0	0	0	0	0	0	0	0	0	0	0	0	0	0	0	0	0	0	0	0	0	0	0	0	0	0	0	0	0	0	n	Proteobacteria	0.77	Gammaproteobacteria	0.56			Legionellales	0.15			Coxiellaceae	0.15	Diplorickettsia	0.15
Otu396	0	0	0	0	0	0	0	0	0	0	0	0	0	0	0	0	0	0	0	0	0	0	0	0	0	0	0	0	0	0	n	Chloroflexi	0.56	Ardenticatenia	0.25			Ardenticatenales	0.25			Ardenticatenaceae	0.25	Ardenticatena	0.25
Otu397	0	0	0	0	0	0	0	0	0	0	0	0	0	0	0	0	0	0	0	0	0	0	0	0	0	0	0	0	0	0	n	Proteobacteria	0.99	Alphaproteobacteria	0.98			Sneathiellales	0.62			Sneathiellaceae	0.62	Taonella	0.48
Otu398	0	0	0	0	0	0	0	0	0	0	0	0	0	0	0	0	0	0	0	0	0	0	0	0	0	0	0	0	0	0	n	Acidobacteria	0.91	Acidobacteria_Gp5	0.78									Gp5	0.78
Otu399	0	0	0	0	0	0	0	0	0	0	0	0	0	0	0	0	0	0	0	0	0	0	0	0	0	0	0	0	0	0	n	Verrucomicrobia	1	Spartobacteria	0.99									Spartobacteria_genera_incertae_sedis	0.99
Otu40	343	19	54	622	147	12	33	42	0	0	5	218	329	2	13	0.00976596	0.000803689	0.00197715	0.0164812	0.0054068	0.000511705	0.000863829	0.00107878	0	0	7.34204e-05	0.00516588	0.00620919	3.48189e-05	0.000230068	n	Firmicutes	1	Bacilli	1			Bacillales	1			Paenibacillaceae 1	1	Paenibacillus	0.98
Otu400	0	0	0	0	0	0	0	0	0	0	0	0	0	0	0	0	0	0	0	0	0	0	0	0	0	0	0	0	0	0	n	Acidobacteria	1	Acidobacteria_Gp3	1									Bryobacter	0.48
Otu401	0	0	0	0	0	0	0	0	0	0	0	0	0	0	0	0	0	0	0	0	0	0	0	0	0	0	0	0	0	0	n	Proteobacteria	0.76	Deltaproteobacteria	0.53			Desulfobacterales	0.33			Desulfobulbaceae	0.19	Desulfofustis	0.17
Otu402	0	0	0	0	0	0	0	0	0	0	0	0	0	0	0	0	0	0	0	0	0	0	0	0	0	0	0	0	0	0	n	Proteobacteria	0.93	Deltaproteobacteria	0.78			Bdellovibrionales	0.66			Bdellovibrionaceae	0.62	Bdellovibrio	0.62
Otu403	0	0	0	0	0	0	0	0	0	0	0	0	0	0	0	0	0	0	0	0	0	0	0	0	0	0	0	0	0	0	n	Bacteroidetes	0.99	Bacteroidia	0.3			"Bacteroidales"	0.3			"Rikenellaceae"	0.29	Mucinivorans	0.23
Otu404	0	0	0	0	0	0	0	0	0	0	0	0	0	0	0	0	0	0	0	0	0	0	0	0	0	0	0	0	0	0	n	Proteobacteria	1	Deltaproteobacteria	1			Myxococcales	1	Cystobacterineae	1	Cystobacteraceae	0.89	Cystobacter	0.84
Otu405	0	0	0	0	0	0	0	0	0	0	0	0	0	0	0	0	0	0	0	0	0	0	0	0	0	0	0	0	0	0	n	Proteobacteria	1	Alphaproteobacteria	0.99			Sneathiellales	0.33			Sneathiellaceae	0.33	Taonella	0.33
Otu406	0	0	0	0	0	0	0	0	0	0	0	0	0	0	0	0	0	0	0	0	0	0	0	0	0	0	0	0	0	0	n	Proteobacteria	1	Alphaproteobacteria	1			Rhodospirillales	0.89			Rhodospirillaceae	0.86	Rhodospirillum	0.09
Otu407	0	0	0	0	0	0	0	0	0	0	0	0	0	0	0	0	0	0	0	0	0	0	0	0	0	0	0	0	0	0	n	Bacteroidetes	1	Cytophagia	0.71			Cytophagales	0.71					Chryseolinea	0.51
Otu408	0	0	0	0	0	0	0	0	0	0	0	0	0	0	0	0	0	0	0	0	0	0	0	0	0	0	0	0	0	0	n	Proteobacteria	1	Alphaproteobacteria	1			Alphaproteobacteria_incertae_sedis	1					Geminicoccus	1
Otu409	0	0	0	0	0	0	0	0	0	0	0	0	0	0	0	0	0	0	0	0	0	0	0	0	0	0	0	0	0	0	n	Proteobacteria	1	Gammaproteobacteria	1			Xanthomonadales	1			Xanthomonadaceae	1	Oleiagrimonas	0.34
Otu41	0	0	0	0	0	0	0	0	0	0	0	0	0	0	0	0	0	0	0	0	0	0	0	0	0	0	0	0	0	0	n	Proteobacteria	1	Alphaproteobacteria	1			Rhizobiales	1			Xanthobacteraceae	0.45	Pseudolabrys	0.41
Otu410	0	0	0	0	0	0	0	0	0	0	0	0	0	0	0	0	0	0	0	0	0	0	0	0	0	0	0	0	0	0	n	Actinobacteria	1	Actinobacteria	1	Acidimicrobidae	0.68	Acidimicrobiales	0.68	"Acidimicrobineae"	0.68	"Acidimicrobineae"_incertae_sedis	0.24	Aciditerrimonas	0.24
Otu411	0	0	0	0	0	0	0	0	0	0	0	0	0	0	0	0	0	0	0	0	0	0	0	0	0	0	0	0	0	0	n	Proteobacteria	1	Betaproteobacteria	0.96			Sulfuricellales	0.25			Sulfuricellaceae	0.25	Sulfuricella	0.24
Otu412	0	0	0	0	0	0	0	0	0	0	0	0	0	0	0	0	0	0	0	0	0	0	0	0	0	0	0	0	0	0	n	Proteobacteria	1	Alphaproteobacteria	1			Rhizobiales	1			Methylocystaceae	0.92	Methylocystis	0.51
Otu413	0	0	0	0	0	0	0	0	0	0	0	0	0	0	0	0	0	0	0	0	0	0	0	0	0	0	0	0	0	0	n	Proteobacteria	1	Alphaproteobacteria	1			Rhizobiales	1			Hyphomicrobiaceae	0.95	Rhodoplanes	0.94
Otu414	0	0	0	0	0	0	0	0	0	0	0	0	0	0	0	0	0	0	0	0	0	0	0	0	0	0	0	0	0	0	n	Acidobacteria	0.99	Acidobacteria_Gp3	0.99									Bryobacter	0.44
Otu415	0	0	0	0	0	0	0	0	0	0	0	0	0	0	0	0	0	0	0	0	0	0	0	0	0	0	0	0	0	0	n	Latescibacteria	0.45											Latescibacteria_genera_incertae_sedis	0.45
Otu416	0	0	0	0	0	0	0	0	0	0	0	0	0	0	0	0	0	0	0	0	0	0	0	0	0	0	0	0	0	0	n	Actinobacteria	1	Actinobacteria	1	Actinobacteridae	1	Actinomycetales	1	Frankineae	1	Cryptosporangiaceae	1	Jatrophihabitans	1
Otu417	0	0	0	0	0	0	0	0	0	0	0	0	0	0	0	0	0	0	0	0	0	0	0	0	0	0	0	0	0	0	n	Proteobacteria	1	Alphaproteobacteria	1			Rhodospirillales	0.94			Acetobacteraceae	0.93	Acidisphaera	0.52
Otu418	0	0	0	0	0	0	0	0	0	0	0	0	0	0	0	0	0	0	0	0	0	0	0	0	0	0	0	0	0	0	n	Actinobacteria	1	Actinobacteria	1	Actinobacteridae	1	Actinomycetales	1	Micrococcineae	1	Intrasporangiaceae	1	Terrabacter	1
Otu419	0	0	0	0	0	0	0	0	0	0	0	0	0	0	0	0	0	0	0	0	0	0	0	0	0	0	0	0	0	0	n	Proteobacteria	1	Alphaproteobacteria	1			Sphingomonadales	1			Sphingomonadaceae	1	Sphingomonas	0.56
Otu420	0	0	0	0	0	0	0	0	0	0	0	0	0	0	0	0	0	0	0	0	0	0	0	0	0	0	0	0	0	0	n	Actinobacteria	1	Actinobacteria	1	Actinobacteridae	1	Actinomycetales	1	Frankineae	0.96	Nakamurellaceae	0.96	Nakamurella	0.96
Otu421	0	0	0	0	0	0	0	0	0	1	0	0	0	0	0	0	0	0	0	0	0	0	0	0	2.0014e-05	0	0	0	0	0	n	Actinobacteria	1	Actinobacteria	1	Actinobacteridae	1	Actinomycetales	1	Pseudonocardineae	0.96	Pseudonocardiaceae	0.96	Pseudonocardia	0.91
Otu422	0	1	0	0	0	0	0	0	0	0	0	0	0	0	0	0	4.22994e-05	0	0	0	0	0	0	0	0	0	0	0	0	0	n	Actinobacteria	1	Actinobacteria	1	Actinobacteridae	1	Actinomycetales	1	Propionibacterineae	0.99	Nocardioidaceae	0.99	Nocardioides	0.96
Otu423	0	0	0	0	0	0	0	0	0	0	0	0	0	0	0	0	0	0	0	0	0	0	0	0	0	0	0	0	0	0	n	Proteobacteria	1	Alphaproteobacteria	1			Alphaproteobacteria_incertae_sedis	0.38					Rhizomicrobium	0.38
Otu424	0	0	0	0	0	0	0	0	0	0	0	0	0	0	0	0	0	0	0	0	0	0	0	0	0	0	0	0	0	0	n	Acidobacteria	0.41	Acidobacteria_Gp1	0.17									Candidatus Koribacter	0.11
Otu425	0	0	0	0	0	0	0	0	0	0	0	0	0	0	0	0	0	0	0	0	0	0	0	0	0	0	0	0	0	0	n	Proteobacteria	1	Alphaproteobacteria	1			Rhizobiales	0.91			"Aurantimonadaceae"	0.85	Aureimonas	0.81
Otu426	0	0	0	0	0	0	0	0	0	0	0	0	0	0	0	0	0	0	0	0	0	0	0	0	0	0	0	0	0	0	n	Proteobacteria	1	Alphaproteobacteria	1			Rhizobiales	1			Hyphomicrobiaceae	1	Hyphomicrobium	1
Otu427	0	0	0	0	0	0	0	0	0	0	0	0	0	0	0	0	0	0	0	0	0	0	0	0	0	0	0	0	0	0	n	Gemmatimonadetes	0.83	Gemmatimonadetes	0.83			Gemmatimonadales	0.83			Gemmatimonadaceae	0.83	Gemmatimonas	0.83
Otu428	0	0	0	0	0	0	0	0	0	0	0	0	0	0	0	0	0	0	0	0	0	0	0	0	0	0	0	0	0	0	n	Proteobacteria	1	Alphaproteobacteria	1			Rhodospirillales	0.99			Rhodospirillaceae	0.92	Dongia	0.6
Otu429	0	0	0	0	0	0	0	0	0	0	0	0	0	0	0	0	0	0	0	0	0	0	0	0	0	0	0	0	0	0	n	Proteobacteria	0.99	Alphaproteobacteria	0.99			Caulobacterales	0.85			Caulobacteraceae	0.76	Caulobacter	0.61
Otu43	0	96	28	53	63	39	9	24	2	0	202	205	194	19	88	0	0.00406074	0.00102519	0.00140435	0.0023172	0.00166304	0.00023559	0.000616444	4.98058e-05	0	0.00296618	0.00485782	0.00366134	0.00033078	0.00155738	n	Proteobacteria	1	Betaproteobacteria	1			Burkholderiales	1			Oxalobacteraceae	1	Massilia	1
Otu430	0	0	0	0	0	0	0	0	0	0	0	0	0	0	0	0	0	0	0	0	0	0	0	0	0	0	0	0	0	0	n	Proteobacteria	1	Alphaproteobacteria	1			Rhodospirillales	1					Reyranella	1
Otu431	0	0	0	0	0	0	0	0	0	0	0	0	0	0	0	0	0	0	0	0	0	0	0	0	0	0	0	0	0	0	n	Proteobacteria	1	Alphaproteobacteria	1			Rhizobiales	0.98			Phyllobacteriaceae	0.84	Chelativorans	0.6
Otu432	0	0	0	0	0	0	0	0	1	0	0	0	0	0	0	0	0	0	0	0	0	0	0	2.49029e-05	0	0	0	0	0	0	n	Actinobacteria	1	Actinobacteria	1	Actinobacteridae	1	Actinomycetales	1	Frankineae	0.99	Cryptosporangiaceae	0.98	Jatrophihabitans	0.98
Otu433	0	0	0	0	0	0	0	0	0	0	0	0	0	0	0	0	0	0	0	0	0	0	0	0	0	0	0	0	0	0	n	Proteobacteria	0.48	Deltaproteobacteria	0.43			Deltaproteobacteria_incertae_sedis	0.28					Dissulfuribacter	0.28
Otu434	0	0	0	0	0	0	0	0	0	0	0	0	0	0	0	0	0	0	0	0	0	0	0	0	0	0	0	0	0	0	n	Acidobacteria	1	Acidobacteria_Gp3	1									Bryobacter	0.77
Otu435	0	0	0	0	0	0	0	0	2	0	0	0	0	0	0	0	0	0	0	0	0	0	0	4.98058e-05	0	0	0	0	0	0	n	Actinobacteria	1	Actinobacteria	1	Actinobacteridae	1	Actinomycetales	1	Propionibacterineae	1	Nocardioidaceae	1	Nocardioides	1
Otu436	0	0	0	0	0	0	0	0	0	0	0	0	0	0	0	0	0	0	0	0	0	0	0	0	0	0	0	0	0	0	n	Proteobacteria	0.68	Deltaproteobacteria	0.65			Desulfuromonadales	0.35			Geobacteraceae	0.32	Geoalkalibacter	0.29
Otu437	0	0	0	0	0	0	0	0	0	0	0	0	0	0	0	0	0	0	0	0	0	0	0	0	0	0	0	0	0	0	n	Proteobacteria	1	Alphaproteobacteria	1			Sphingomonadales	1			Sphingomonadaceae	0.88	Sphingorhabdus	0.44
Otu438	0	0	0	0	0	0	0	0	0	0	0	0	0	0	0	0	0	0	0	0	0	0	0	0	0	0	0	0	0	0	n	Proteobacteria	1	Alphaproteobacteria	1			Rhizobiales	1			Beijerinckiaceae	0.7	Chelatococcus	0.64
Otu439	0	0	0	0	0	43	24	66	0	4	0	0	0	0	0	0	0	0	0	0	0.00183361	0.000628239	0.00169522	0	8.0056e-05	0	0	0	0	0	n	Proteobacteria	1	Alphaproteobacteria	1			Rhizobiales	1			Rhizobiaceae	0.85	Neorhizobium	0.45
Otu44	0	0	0	0	0	51	226	122	18	706	0	0	0	0	0	0	0	0	0	0	0.00217475	0.00591592	0.00313359	0.000448252	0.0141299	0	0	0	0	0	n	Proteobacteria	1	Gammaproteobacteria	1			"Enterobacteriales"	1			Enterobacteriaceae	1	Hafnia	0.68
Otu440	0	0	0	0	0	0	0	0	0	0	0	0	0	0	0	0	0	0	0	0	0	0	0	0	0	0	0	0	0	0	n	Acidobacteria	1	Acidobacteria_Gp1	1									Gp1	0.95
Otu441	0	0	0	0	0	0	0	0	0	0	0	0	0	0	0	0	0	0	0	0	0	0	0	0	0	0	0	0	0	0	n	Proteobacteria	0.67	Deltaproteobacteria	0.53			Desulfuromonadales	0.34			Geobacteraceae	0.34	Geothermobacter	0.34
Otu442	0	0	0	0	0	0	0	0	0	0	0	0	0	0	0	0	0	0	0	0	0	0	0	0	0	0	0	0	0	0	n	Proteobacteria	1	Alphaproteobacteria	1			Rhizobiales	1			Methylobacteriaceae	1	Microvirga	1
Otu443	0	0	0	0	0	0	0	0	0	0	0	0	0	0	0	0	0	0	0	0	0	0	0	0	0	0	0	0	0	0	n	Gemmatimonadetes	0.85	Gemmatimonadetes	0.85			Gemmatimonadales	0.85			Gemmatimonadaceae	0.85	Gemmatimonas	0.85
Otu444	0	0	0	0	0	0	0	0	0	0	0	0	0	0	0	0	0	0	0	0	0	0	0	0	0	0	0	0	0	0	n	Proteobacteria	0.88	Alphaproteobacteria	0.44			Caulobacterales	0.43			Hyphomonadaceae	0.43	Marinicauda	0.42
Otu445	0	0	0	0	0	0	44	0	0	0	0	0	0	0	0	0	0	0	0	0	0	0.00115177	0	0	0	0	0	0	0	0	n	Firmicutes	1	Bacilli	1			Bacillales	1			Paenibacillaceae 1	1	Paenibacillus	1
Otu446	0	0	0	0	0	0	0	0	0	0	0	0	0	0	0	0	0	0	0	0	0	0	0	0	0	0	0	0	0	0	n	Proteobacteria	0.93	Deltaproteobacteria	0.82			Myxococcales	0.76	Sorangiineae	0.38	Polyangiaceae	0.37	Byssovorax	0.31
Otu447	0	0	0	0	0	0	0	0	0	0	0	0	0	0	0	0	0	0	0	0	0	0	0	0	0	0	0	0	0	0	n	Proteobacteria	1	Alphaproteobacteria	1			Rhodospirillales	1			Rhodospirillaceae	1	Dongia	0.99
Otu448	0	0	0	0	0	0	0	0	0	0	0	0	0	0	0	0	0	0	0	0	0	0	0	0	0	0	0	0	0	0	n	Proteobacteria	1	Alphaproteobacteria	1			Caulobacterales	0.94			Caulobacteraceae	0.94	Caulobacter	0.66
Otu449	0	0	0	0	0	0	0	0	0	0	0	0	0	0	0	0	0	0	0	0	0	0	0	0	0	0	0	0	0	0	n	Proteobacteria	1	Alphaproteobacteria	1			Rhodospirillales	1			Acetobacteraceae	1	Granulibacter	0.42
Otu45	0	0	0	0	0	0	0	0	0	0	0	0	0	0	0	0	0	0	0	0	0	0	0	0	0	0	0	0	0	0	n	Acidobacteria	1	Acidobacteria_Gp3	1									Candidatus Solibacter	0.99
Otu450	0	0	0	0	0	24	21	40	27	3	52	19	30	24	9	0	0	0	0	0	0.00102341	0.000549709	0.00102741	0.000672378	6.0042e-05	0.000763572	0.000450237	0.000566187	0.000417827	0.000159278	n	Proteobacteria	1	Betaproteobacteria	1			Burkholderiales	1			Oxalobacteraceae	0.99	Undibacterium	0.57
Otu451	0	0	0	0	0	0	0	0	0	0	0	0	0	0	0	0	0	0	0	0	0	0	0	0	0	0	0	0	0	0	n	Proteobacteria	0.98	Alphaproteobacteria	0.98			Rhodospirillales	0.98			Acetobacteraceae	0.96	Belnapia	0.31
Otu452	0	0	0	0	0	0	0	0	0	0	0	0	0	0	0	0	0	0	0	0	0	0	0	0	0	0	0	0	0	0	n	Proteobacteria	1	Alphaproteobacteria	1			Rhizobiales	0.98			Methylobacteriaceae	0.7	Psychroglaciecola	0.64
Otu453	0	0	0	0	0	0	0	0	0	0	0	0	0	0	0	0	0	0	0	0	0	0	0	0	0	0	0	0	0	0	n	Proteobacteria	1	Alphaproteobacteria	1			Caulobacterales	1			Caulobacteraceae	1	Asticcacaulis	1
Otu454	0	0	0	0	0	0	0	0	0	0	0	0	0	0	0	0	0	0	0	0	0	0	0	0	0	0	0	0	0	0	n	Proteobacteria	1	Gammaproteobacteria	0.99			Xanthomonadales	0.99			Sinobacteraceae	0.99	Steroidobacter	0.99
Otu455	0	0	0	0	0	0	0	0	0	0	0	0	0	0	0	0	0	0	0	0	0	0	0	0	0	0	0	0	0	0	n	Proteobacteria	1	Alphaproteobacteria	1			Rhizobiales	0.9			Rhizobiales_incertae_sedis	0.47	Alsobacter	0.45
Otu456	0	0	0	0	0	2	0	0	0	0	0	0	0	0	0	0	0	0	0	0	8.52842e-05	0	0	0	0	0	0	0	0	0	n	Deinococcus-Thermus	1	Deinococci	1			Thermales	1			Thermaceae	1	Meiothermus	1
Otu457	0	0	0	0	0	0	0	0	0	0	0	0	0	0	0	0	0	0	0	0	0	0	0	0	0	0	0	0	0	0	n	Actinobacteria	1	Thermoleophilia	0.46			Thermoleophilales	0.46			Thermoleophilaceae	0.46	Thermoleophilum	0.46
Otu458	0	0	0	0	0	0	0	0	0	0	0	0	0	0	0	0	0	0	0	0	0	0	0	0	0	0	0	0	0	0	n	Chloroflexi	0.58	Chloroflexia	0.32			Kallotenuales	0.02			Kallotenuaceae	0.02	Kallotenue	0.02
Otu459	0	0	0	0	0	0	0	0	0	0	0	0	0	0	0	0	0	0	0	0	0	0	0	0	0	0	0	0	0	0	n	Acidobacteria	1	Acidobacteria_Gp2	1									Gp2	1
Otu46	0	0	0	0	0	0	0	0	0	0	0	0	0	0	0	0	0	0	0	0	0	0	0	0	0	0	0	0	0	0	n	Proteobacteria	0.99	Betaproteobacteria	0.99			Rhodocyclales	0.33			Rhodocyclaceae	0.33	Uliginosibacterium	0.23
Otu460	0	0	0	0	0	0	0	0	0	0	0	0	0	0	0	0	0	0	0	0	0	0	0	0	0	0	0	0	0	0	n	Proteobacteria	1	Alphaproteobacteria	1			Rhizobiales	0.96			"Aurantimonadaceae"	0.53	Aureimonas	0.51
Otu461	0	0	0	0	0	0	0	0	0	0	1	1	1	0	7	0	0	0	0	0	0	0	0	0	0	1.46841e-05	2.36967e-05	1.88729e-05	0	0.000123883	n	Proteobacteria	0.96	Alphaproteobacteria	0.9			Rhodospirillales	0.81			Rhodospirillaceae	0.81	Nitrospirillum	0.32
Otu462	0	0	0	0	0	93	38	35	18	0	0	0	0	0	0	0	0	0	0	0	0.00396572	0.000994712	0.00089898	0.000448252	0	0	0	0	0	0	n	Proteobacteria	1	Alphaproteobacteria	1			Sphingomonadales	0.96			Sphingomonadaceae	0.94	Rhizorhabdus	0.44
Otu463	0	0	0	0	0	0	0	0	0	0	0	0	0	0	0	0	0	0	0	0	0	0	0	0	0	0	0	0	0	0	n	Gemmatimonadetes	0.79	Gemmatimonadetes	0.79			Gemmatimonadales	0.79			Gemmatimonadaceae	0.79	Gemmatimonas	0.79
Otu464	0	0	0	0	0	0	0	0	0	0	0	0	0	0	0	0	0	0	0	0	0	0	0	0	0	0	0	0	0	0	n	Proteobacteria	1	Betaproteobacteria	0.79			Burkholderiales	0.54			Oxalobacteraceae	0.52	Paraherbaspirillum	0.39
Otu465	0	0	0	0	0	0	0	0	0	0	0	0	0	0	0	0	0	0	0	0	0	0	0	0	0	0	0	0	0	0	n	Proteobacteria	1	Alphaproteobacteria	1			Rhizobiales	0.95			Xanthobacteraceae	0.53	Pseudoxanthobacter	0.4
Otu466	0	0	0	0	0	0	0	0	0	0	0	0	0	0	0	0	0	0	0	0	0	0	0	0	0	0	0	0	0	0	n	Proteobacteria	1	Deltaproteobacteria	1			Bdellovibrionales	1			Bacteriovoracaceae	1	Peredibacter	1
Otu467	0	0	0	0	0	0	0	0	0	0	0	0	0	0	0	0	0	0	0	0	0	0	0	0	0	0	0	0	0	0	n	Bacteroidetes	1	Cytophagia	0.61			Cytophagales	0.61					Chryseolinea	0.24
Otu468	0	0	0	0	0	0	0	0	0	0	0	0	0	0	0	0	0	0	0	0	0	0	0	0	0	0	0	0	0	0	n	Proteobacteria	1	Alphaproteobacteria	1			Rhizobiales	0.98			"Aurantimonadaceae"	0.39	Aureimonas	0.29
Otu469	0	0	0	0	0	0	0	0	0	0	0	0	0	0	0	0	0	0	0	0	0	0	0	0	0	0	0	0	0	0	n	Acidobacteria	1	Acidobacteria_Gp3	1									Candidatus Solibacter	1
Otu47	0	0	0	0	0	0	0	0	0	0	0	0	0	0	0	0	0	0	0	0	0	0	0	0	0	0	0	0	0	0	n	Verrucomicrobia	1	Subdivision3	1									Subdivision3_genera_incertae_sedis	1
Otu470	0	0	0	0	0	0	0	0	0	0	0	0	0	0	0	0	0	0	0	0	0	0	0	0	0	0	0	0	0	0	n	Proteobacteria	0.99	Alphaproteobacteria	0.96			Caulobacterales	0.82			Hyphomonadaceae	0.82	Woodsholea	0.19
Otu471	0	0	0	0	0	0	0	0	0	0	0	0	0	0	0	0	0	0	0	0	0	0	0	0	0	0	0	0	0	0	n	Proteobacteria	0.98	Betaproteobacteria	0.97			Rhodocyclales	0.59			Rhodocyclaceae	0.59	Uliginosibacterium	0.52
Otu472	0	0	0	0	0	0	0	0	0	0	0	0	0	0	0	0	0	0	0	0	0	0	0	0	0	0	0	0	0	0	n	Gemmatimonadetes	0.85	Gemmatimonadetes	0.85			Gemmatimonadales	0.85			Gemmatimonadaceae	0.85	Gemmatimonas	0.85
Otu473	0	0	0	0	0	0	0	0	0	0	0	0	0	0	0	0	0	0	0	0	0	0	0	0	0	0	0	0	0	0	n	Proteobacteria	1	Alphaproteobacteria	0.99			Alphaproteobacteria_incertae_sedis	0.96					Rhizomicrobium	0.96
Otu474	0	0	0	0	0	0	0	0	0	0	0	0	0	0	0	0	0	0	0	0	0	0	0	0	0	0	0	0	0	0	n	Actinobacteria	0.98	Actinobacteria	0.98	Rubrobacteridae	0.98	Gaiellales	0.98			Gaiellaceae	0.98	Gaiella	0.98
Otu475	0	0	0	0	0	0	0	0	0	0	0	0	0	0	0	0	0	0	0	0	0	0	0	0	0	0	0	0	0	0	n	Proteobacteria	1	Alphaproteobacteria	1			Rhizobiales	1			Methylobacteriaceae	1	Microvirga	1
Otu476	0	0	0	0	18	0	0	0	3	0	3	0	0	4	0	0	0	0	0	0.000662057	0	0	0	7.47086e-05	0	4.40522e-05	0	0	6.96379e-05	0	n	Proteobacteria	0.81	Alphaproteobacteria	0.74			Rhodospirillales	0.54			Rhodospirillaceae	0.52	Lacibacterium	0.3
Otu477	0	0	0	0	0	0	0	0	0	0	0	0	0	0	0	0	0	0	0	0	0	0	0	0	0	0	0	0	0	0	n	Proteobacteria	0.97	Deltaproteobacteria	0.77			Myxococcales	0.65	Cystobacterineae	0.39	Cystobacteraceae	0.28	Archangium	0.06
Otu478	0	0	0	0	0	0	0	0	0	0	0	0	0	0	0	0	0	0	0	0	0	0	0	0	0	0	0	0	0	0	n	Proteobacteria	0.93	Deltaproteobacteria	0.88			Myxococcales	0.83	Sorangiineae	0.49	Polyangiaceae	0.45	Byssovorax	0.42
Otu479	0	0	0	0	0	0	0	0	0	0	0	0	0	0	0	0	0	0	0	0	0	0	0	0	0	0	0	0	0	0	n	Actinobacteria	0.59	Actinobacteria	0.58	Actinobacteridae	0.4	Actinomycetales	0.4	Propionibacterineae	0.22	Nocardioidaceae	0.17	Thermasporomyces	0.11
Otu48	0	6	0	0	17	70	490	353	247	129	0	0	0	1	0	0	0.000253796	0	0	0.000625276	0.00298495	0.0128266	0.00906686	0.00615101	0.00258181	0	0	0	1.74095e-05	0	n	Actinobacteria	1	Actinobacteria	1	Actinobacteridae	1	Actinomycetales	1	Corynebacterineae	1	Nocardiaceae	1	Rhodococcus	1
Otu480	0	0	0	0	0	0	0	0	0	0	0	0	0	0	0	0	0	0	0	0	0	0	0	0	0	0	0	0	0	0	n	Proteobacteria	0.99	Alphaproteobacteria	0.95			Sphingomonadales	0.89			Sphingomonadaceae	0.86	Polymorphobacter	0.31
Otu481	0	0	0	0	0	0	0	0	0	0	0	0	0	0	0	0	0	0	0	0	0	0	0	0	0	0	0	0	0	0	n	Acidobacteria	0.98	Acidobacteria_Gp3	0.98									Bryobacter	0.56
Otu482	0	0	0	0	0	0	0	0	0	0	0	0	0	0	0	0	0	0	0	0	0	0	0	0	0	0	0	0	0	0	n	Acidobacteria	1	Acidobacteria_Gp1	1									Acidipila	0.85
Otu483	0	0	0	0	0	0	0	0	0	0	0	0	0	0	0	0	0	0	0	0	0	0	0	0	0	0	0	0	0	0	n	Actinobacteria	0.67	Actinobacteria	0.66	Nitriliruptoridae	0.24	Nitriliruptorales	0.22			Nitriliruptoraceae	0.22	Nitriliruptor	0.22
Otu484	0	0	0	0	0	0	0	0	0	0	0	0	0	0	0	0	0	0	0	0	0	0	0	0	0	0	0	0	0	0	n	Actinobacteria	0.93	Actinobacteria	0.89	Rubrobacteridae	0.84	Gaiellales	0.84			Gaiellaceae	0.84	Gaiella	0.84
Otu485	0	0	0	0	0	0	0	0	0	0	0	0	0	0	0	0	0	0	0	0	0	0	0	0	0	0	0	0	0	0	n	Proteobacteria	0.98	Alphaproteobacteria	0.96			Rhodospirillales	0.69			Rhodospirillaceae	0.68	Lacibacterium	0.25
Otu486	0	0	0	0	0	0	0	0	0	0	0	0	0	0	0	0	0	0	0	0	0	0	0	0	0	0	0	0	0	0	n	Firmicutes	1	Bacilli	1			Bacillales	1			Bacillaceae 2	0.95	Tuberibacillus	0.95
Otu487	0	0	0	0	0	0	0	0	0	0	0	0	0	0	0	0	0	0	0	0	0	0	0	0	0	0	0	0	0	0	n	Candidatus Saccharibacteria	1											Saccharibacteria_genera_incertae_sedis	1
Otu488	0	0	0	0	0	0	0	0	0	0	0	0	0	0	0	0	0	0	0	0	0	0	0	0	0	0	0	0	0	0	n	Bacteroidetes	1	Sphingobacteriia	0.85			"Sphingobacteriales"	0.85			Chitinophagaceae	0.69	Arachidicoccus	0.66
Otu489	0	0	0	0	0	0	0	0	0	0	0	0	0	0	0	0	0	0	0	0	0	0	0	0	0	0	0	0	0	0	n	Gemmatimonadetes	0.73	Gemmatimonadetes	0.73			Gemmatimonadales	0.73			Gemmatimonadaceae	0.73	Gemmatimonas	0.73
Otu49	0	1	0	0	0	1	0	0	0	0	9	4	0	0	1	0	4.22994e-05	0	0	0	4.26421e-05	0	0	0	0	0.000132157	9.47867e-05	0	0	1.76975e-05	n	Proteobacteria	1	Alphaproteobacteria	1			Alphaproteobacteria_incertae_sedis	0.91					Rhizomicrobium	0.91
Otu490	0	0	0	0	0	0	0	0	0	0	0	0	0	0	0	0	0	0	0	0	0	0	0	0	0	0	0	0	0	0	n	Actinobacteria	1	Actinobacteria	1	Acidimicrobidae	0.95	Acidimicrobiales	0.95	"Acidimicrobineae"	0.95	"Acidimicrobineae"_incertae_sedis	0.47	Aciditerrimonas	0.47
Otu491	0	0	0	0	0	0	0	0	0	0	0	0	0	0	0	0	0	0	0	0	0	0	0	0	0	0	0	0	0	0	n	Bacteroidetes	0.96	Bacteroidia	0.29			"Bacteroidales"	0.29			Prolixibacteraceae	0.24	Draconibacterium	0.24
Otu492	0	0	0	0	0	0	0	0	0	0	0	0	0	0	0	0	0	0	0	0	0	0	0	0	0	0	0	0	0	0	n	Planctomycetes	0.89	Planctomycetia	0.59			Planctomycetales	0.58			Planctomycetaceae	0.58	Thermogutta	0.23
Otu493	0	0	0	0	0	0	0	0	0	0	0	0	0	0	0	0	0	0	0	0	0	0	0	0	0	0	0	0	0	0	n	Actinobacteria	1	Actinobacteria	1	Actinobacteridae	1	Actinomycetales	1	Pseudonocardineae	0.26	Pseudonocardiaceae	0.26	Crossiella	0.22
Otu494	0	0	0	0	0	0	0	0	0	0	0	0	0	0	0	0	0	0	0	0	0	0	0	0	0	0	0	0	0	0	n	Bacteroidetes	0.96	Cytophagia	0.85			Cytophagales	0.85			Flammeovirgaceae	0.62	Roseivirga	0.28
Otu495	0	0	0	0	0	0	0	0	0	0	0	0	0	0	0	0	0	0	0	0	0	0	0	0	0	0	0	0	0	0	n	Proteobacteria	0.98	Deltaproteobacteria	0.93			Syntrophobacterales	0.76			Syntrophobacteraceae	0.66	Desulfoglaeba	0.59
Otu496	0	0	0	0	0	0	0	0	0	0	0	0	0	0	0	0	0	0	0	0	0	0	0	0	0	0	0	0	0	0	n	Proteobacteria	0.87	Deltaproteobacteria	0.72			Bdellovibrionales	0.58			Bacteriovoracaceae	0.58	Peredibacter	0.49
Otu497	0	0	0	0	0	0	0	0	0	0	0	0	0	0	0	0	0	0	0	0	0	0	0	0	0	0	0	0	0	0	n	Acidobacteria	0.99	Acidobacteria_Gp3	0.99									Candidatus Solibacter	0.46
Otu498	0	0	0	0	0	0	0	0	0	0	0	0	0	0	0	0	0	0	0	0	0	0	0	0	0	0	0	0	0	0	n	Elusimicrobia	0.52	Endomicrobia	0.5									Candidatus Endomicrobium	0.5
Otu499	0	0	0	0	0	0	0	0	0	0	0	0	0	0	0	0	0	0	0	0	0	0	0	0	0	0	0	0	0	0	n	Actinobacteria	0.99	Actinobacteria	0.93	Rubrobacteridae	0.92	Gaiellales	0.77			Gaiellaceae	0.77	Gaiella	0.77
Otu50	0	0	0	0	0	0	0	0	0	0	0	0	0	0	0	0	0	0	0	0	0	0	0	0	0	0	0	0	0	0	n	Acidobacteria	1	Acidobacteria_Gp3	1									Candidatus Solibacter	0.86
Otu500	0	0	0	0	0	0	0	0	0	0	0	0	0	0	0	0	0	0	0	0	0	0	0	0	0	0	0	0	0	0	n	Actinobacteria	1	Actinobacteria	1	Actinobacteridae	1	Actinomycetales	1	Pseudonocardineae	1	Pseudonocardiaceae	1	Pseudonocardia	1
Otu501	0	0	0	0	0	0	0	0	0	0	0	0	0	0	0	0	0	0	0	0	0	0	0	0	0	0	0	0	0	0	n	Proteobacteria	0.66	Deltaproteobacteria	0.49			Desulfobacterales	0.27			Desulfobacteraceae	0.23	Desulfatitalea	0.2
Otu502	0	0	0	0	0	0	0	0	0	0	0	0	0	0	0	0	0	0	0	0	0	0	0	0	0	0	0	0	0	0	n	Acidobacteria	0.72	Acidobacteria_Gp10	0.64									Gp10	0.64
Otu503	0	0	0	0	0	0	0	0	0	0	0	0	0	0	0	0	0	0	0	0	0	0	0	0	0	0	0	0	0	0	n	Firmicutes	1	Bacilli	1			Bacillales	0.99			Bacillaceae 1	0.63	Bacillus	0.58
Otu504	0	0	0	0	0	0	0	0	0	0	0	0	0	0	0	0	0	0	0	0	0	0	0	0	0	0	0	0	0	0	n	Proteobacteria	0.99	Alphaproteobacteria	0.98			Sneathiellales	0.32			Sneathiellaceae	0.32	Taonella	0.24
Otu505	0	0	0	0	0	0	0	0	0	0	0	0	0	0	0	0	0	0	0	0	0	0	0	0	0	0	0	0	0	0	n	Proteobacteria	0.99	Alphaproteobacteria	0.99			Rhodospirillales	0.67			Rhodospirillaceae	0.58	Oceanibaculum	0.38
Otu506	0	0	0	0	0	0	0	0	0	0	0	0	0	0	0	0	0	0	0	0	0	0	0	0	0	0	0	0	0	0	n	Proteobacteria	1	Betaproteobacteria	0.54			Burkholderiales	0.33			Burkholderiales_incertae_sedis	0.12	Paucibacter	0.1
Otu507	0	0	0	0	0	0	0	0	0	0	0	0	0	0	0	0	0	0	0	0	0	0	0	0	0	0	0	0	0	0	n	Armatimonadetes	1											Armatimonadetes_gp5	1
Otu508	0	0	0	0	0	0	0	0	0	0	0	0	0	0	0	0	0	0	0	0	0	0	0	0	0	0	0	0	0	0	n	Proteobacteria	0.98	Alphaproteobacteria	0.91			Rickettsiales	0.87			Rickettsiaceae	0.82	Orientia	0.41
Otu509	0	0	0	0	0	0	0	0	0	0	0	0	0	0	0	0	0	0	0	0	0	0	0	0	0	0	0	0	0	0	n	Proteobacteria	1	Alphaproteobacteria	1			Rhizobiales	1			Xanthobacteraceae	1	Pseudolabrys	1
Otu51	0	0	0	0	0	0	0	0	0	0	0	0	0	0	4	0	0	0	0	0	0	0	0	0	0	0	0	0	0	7.07902e-05	n	Proteobacteria	1	Betaproteobacteria	1			Burkholderiales	1			Oxalobacteraceae	1	Massilia	0.57
Otu510	0	0	0	0	0	0	0	0	0	0	0	0	0	0	0	0	0	0	0	0	0	0	0	0	0	0	0	0	0	0	n	Proteobacteria	1	Alphaproteobacteria	1			Rhodobacterales	1			Rhodobacteraceae	1	Rubellimicrobium	0.91
Otu511	0	0	0	0	0	0	0	0	0	0	0	0	0	0	0	0	0	0	0	0	0	0	0	0	0	0	0	0	0	0	n	Acidobacteria	1	Acidobacteria_Gp10	1									Gp10	1
Otu512	0	0	0	0	0	0	0	0	0	0	0	0	0	0	0	0	0	0	0	0	0	0	0	0	0	0	0	0	0	0	n	Actinobacteria	1	Actinobacteria	1	Actinobacteridae	1	Actinomycetales	1	Frankineae	0.9	Cryptosporangiaceae	0.33	Jatrophihabitans	0.33
Otu513	0	0	0	0	0	0	0	0	0	0	0	0	0	0	0	0	0	0	0	0	0	0	0	0	0	0	0	0	0	0	n	Chloroflexi	0.93	Ktedonobacteria	0.91			Ktedonobacterales	0.85			Thermosporotrichaceae	0.71	Thermosporothrix	0.71
Otu514	0	0	0	0	0	0	0	0	0	0	0	0	0	0	0	0	0	0	0	0	0	0	0	0	0	0	0	0	0	0	n	Actinobacteria	0.99	Actinobacteria	0.99	Actinobacteridae	0.99	Actinomycetales	0.99	Propionibacterineae	0.53	Nocardioidaceae	0.5	Kribbella	0.47
Otu515	0	0	0	0	0	0	0	0	0	0	0	0	0	0	0	0	0	0	0	0	0	0	0	0	0	0	0	0	0	0	n	Proteobacteria	1	Alphaproteobacteria	1			Sneathiellales	0.42			Sneathiellaceae	0.42	Ferrovibrio	0.31
Otu516	0	0	0	0	0	0	0	0	0	0	0	0	0	0	0	0	0	0	0	0	0	0	0	0	0	0	0	0	0	0	n	Actinobacteria	0.99	Actinobacteria	0.99	Acidimicrobidae	0.89	Acidimicrobiales	0.89	"Acidimicrobineae"	0.89	"Acidimicrobineae"_incertae_sedis	0.75	Aciditerrimonas	0.75
Otu517	0	0	0	0	0	0	0	0	0	0	0	0	0	0	0	0	0	0	0	0	0	0	0	0	0	0	0	0	0	0	n	Actinobacteria	1	Actinobacteria	1	Actinobacteridae	0.98	Actinomycetales	0.98	Propionibacterineae	0.96	Nocardioidaceae	0.95	Flindersiella	0.65
Otu518	0	0	0	0	0	0	0	0	0	0	0	0	0	0	0	0	0	0	0	0	0	0	0	0	0	0	0	0	0	0	n	Actinobacteria	0.97	Actinobacteria	0.97	Rubrobacteridae	0.76	Gaiellales	0.74			Gaiellaceae	0.74	Gaiella	0.74
Otu519	0	0	0	0	0	0	0	0	0	0	0	0	0	0	0	0	0	0	0	0	0	0	0	0	0	0	0	0	0	0	n	Proteobacteria	1	Alphaproteobacteria	1			Rhizobiales	0.99			Xanthobacteraceae	0.51	Labrys	0.51
Otu520	0	0	0	0	0	0	0	0	0	0	1	0	0	0	0	0	0	0	0	0	0	0	0	0	0	1.46841e-05	0	0	0	0	n	Proteobacteria	1	Betaproteobacteria	0.94			Sulfuricellales	0.39			Sulfuricellaceae	0.39	Sulfuriferula	0.39
Otu521	0	0	0	0	0	0	0	0	0	0	0	0	0	0	0	0	0	0	0	0	0	0	0	0	0	0	0	0	0	0	n	Firmicutes	1	Bacilli	1			Bacillales	1			Paenibacillaceae 1	1	Paenibacillus	1
Otu522	0	0	0	0	0	0	0	0	0	0	0	0	0	0	0	0	0	0	0	0	0	0	0	0	0	0	0	0	0	0	n	Proteobacteria	0.96	Deltaproteobacteria	0.96			Bdellovibrionales	0.94			Bdellovibrionaceae	0.94	Bdellovibrio	0.94
Otu523	0	0	0	0	0	0	0	0	0	0	0	0	0	0	0	0	0	0	0	0	0	0	0	0	0	0	0	0	0	0	n	Verrucomicrobia	0.99	Subdivision3	0.99									Subdivision3_genera_incertae_sedis	0.99
Otu524	0	0	0	0	0	0	0	0	0	0	0	0	0	0	0	0	0	0	0	0	0	0	0	0	0	0	0	0	0	0	n	Proteobacteria	1	Alphaproteobacteria	1			Rhizobiales	0.97			Rhizobiales_incertae_sedis	0.31	Variibacter	0.26
Otu525	0	0	0	0	0	0	0	0	0	0	0	0	0	0	0	0	0	0	0	0	0	0	0	0	0	0	0	0	0	0	n	Proteobacteria	0.74	Deltaproteobacteria	0.59			Desulfobacterales	0.26			Desulfobacteraceae	0.23	Desulforegula	0.18
Otu526	0	0	0	0	0	0	0	0	0	0	0	0	0	0	0	0	0	0	0	0	0	0	0	0	0	0	0	0	0	0	n	Proteobacteria	0.99	Alphaproteobacteria	0.99			Rhizobiales	0.95			Bradyrhizobiaceae	0.31	Rhodoblastus	0.31
Otu527	0	0	0	0	0	0	0	0	0	0	0	0	0	0	0	0	0	0	0	0	0	0	0	0	0	0	0	0	0	0	n	Actinobacteria	1	Actinobacteria	1	Acidimicrobidae	0.82	Acidimicrobiales	0.82	"Acidimicrobineae"	0.82	Acidimicrobiaceae	0.52	Ilumatobacter	0.52
Otu528	0	0	0	0	0	0	0	0	0	0	0	0	0	0	0	0	0	0	0	0	0	0	0	0	0	0	0	0	0	0	n	Firmicutes	0.99	Bacilli	0.94			Bacillales	0.94			Paenibacillaceae 1	0.93	Paenibacillus	0.89
Otu529	0	0	0	0	0	0	0	0	0	0	0	0	0	0	0	0	0	0	0	0	0	0	0	0	0	0	0	0	0	0	n	Acidobacteria	1	Acidobacteria_Gp1	1									Acidobacterium	0.48
Otu53	0	0	0	0	0	0	0	0	0	0	0	0	0	0	0	0	0	0	0	0	0	0	0	0	0	0	0	0	0	0	n	Proteobacteria	0.99	Alphaproteobacteria	0.99			Rhizobiales	0.99			Rhodobiaceae	0.99	Methyloceanibacter	0.81
Otu530	0	0	0	0	0	0	0	0	0	0	0	0	0	0	0	0	0	0	0	0	0	0	0	0	0	0	0	0	0	0	n	Proteobacteria	0.93	Deltaproteobacteria	0.89			Myxococcales	0.84	Nannocystineae	0.7	Kofleriaceae	0.41	Kofleria	0.41
Otu531	0	0	0	0	0	0	0	0	0	0	0	0	0	0	0	0	0	0	0	0	0	0	0	0	0	0	0	0	0	0	n	Proteobacteria	1	Alphaproteobacteria	1			Rhizobiales	0.99			Phyllobacteriaceae	0.77	Mesorhizobium	0.65
Otu532	0	0	0	0	0	0	0	0	0	0	0	0	0	0	0	0	0	0	0	0	0	0	0	0	0	0	0	0	0	0	n	Proteobacteria	1	Alphaproteobacteria	0.98			Sphingomonadales	0.98			Sphingomonadaceae	0.91	Rhizorhapis	0.5
Otu533	0	0	0	0	0	0	0	0	0	0	0	0	0	0	0	0	0	0	0	0	0	0	0	0	0	0	0	0	0	0	n	Proteobacteria	1	Alphaproteobacteria	1			Rhizobiales	1			Hyphomicrobiaceae	0.97	Devosia	0.49
Otu534	0	0	0	0	0	0	0	0	0	0	0	0	0	0	0	0	0	0	0	0	0	0	0	0	0	0	0	0	0	0	n	Armatimonadetes	1	Armatimonadia	1			Armatimonadales	1			Armatimonadaceae	1	Armatimonas/Armatimonadetes_gp1	1
Otu535	0	0	0	0	0	0	0	0	0	0	0	0	0	0	0	0	0	0	0	0	0	0	0	0	0	0	0	0	0	0	n	Actinobacteria	0.99	Actinobacteria	0.99	Acidimicrobidae	0.95	Acidimicrobiales	0.95	"Acidimicrobineae"	0.95	Acidimicrobiaceae	0.77	Ilumatobacter	0.76
Otu536	0	0	0	0	0	0	0	0	0	0	0	0	0	0	0	0	0	0	0	0	0	0	0	0	0	0	0	0	0	0	n	Chloroflexi	0.68	Thermomicrobia	0.26	Sphaerobacteridae	0.21	Sphaerobacterales	0.21	"Sphaerobacterineae"	0.21	Sphaerobacteraceae	0.21	Nitrolancea	0.15
Otu537	0	0	0	0	0	0	0	0	0	0	1	0	0	0	0	0	0	0	0	0	0	0	0	0	0	1.46841e-05	0	0	0	0	n	Proteobacteria	1	Alphaproteobacteria	0.98			Rhodospirillales	0.86			Rhodospirillaceae	0.84	Magnetospirillum	0.53
Otu538	0	0	0	0	0	0	0	0	0	0	0	0	0	0	0	0	0	0	0	0	0	0	0	0	0	0	0	0	0	0	n	Proteobacteria	0.95	Deltaproteobacteria	0.91			Bdellovibrionales	0.87			Bdellovibrionaceae	0.87	Bdellovibrio	0.87
Otu539	0	0	0	0	0	0	0	0	0	0	0	0	0	0	0	0	0	0	0	0	0	0	0	0	0	0	0	0	0	0	n	Chloroflexi	0.53	Dehalococcoidia	0.21			Dehalococcoidales	0.21			Dehalococcoidaceae	0.21	Dehalococcoides	0.21
Otu54	0	0	0	0	0	0	0	0	0	1	0	0	0	0	0	0	0	0	0	0	0	0	0	0	2.0014e-05	0	0	0	0	0	n	Proteobacteria	1	Alphaproteobacteria	1			Rhizobiales	1			Rhizobiales_incertae_sedis	0.6	Variibacter	0.6
Otu540	0	3	29	24	0	25	23	117	63	17	6	1	0	0	28	0	0.000126898	0.0010618	0.00063593	0	0.00106605	0.000602063	0.00300516	0.00156888	0.000340238	8.81044e-05	2.36967e-05	0	0	0.000495531	n	Proteobacteria	1	Betaproteobacteria	1			Burkholderiales	0.95			Oxalobacteraceae	0.94	Duganella	0.57
Otu541	0	0	0	0	0	0	0	0	0	0	0	0	0	0	0	0	0	0	0	0	0	0	0	0	0	0	0	0	0	0	n	Proteobacteria	1	Alphaproteobacteria	1			Rhizobiales	0.99			Bradyrhizobiaceae	0.8	Tardiphaga	0.45
Otu542	0	0	0	0	0	0	0	0	0	0	0	0	0	0	0	0	0	0	0	0	0	0	0	0	0	0	0	0	0	0	n	Proteobacteria	1	Alphaproteobacteria	1			Rhizobiales	1			Rhizobiales_incertae_sedis	0.99	Alsobacter	0.99
Otu543	0	0	0	0	0	0	0	0	0	0	0	0	0	0	0	0	0	0	0	0	0	0	0	0	0	0	0	0	0	0	n	Firmicutes	1	Bacilli	1			Bacillales	1			Paenibacillaceae 1	1	Paenibacillus	0.94
Otu544	0	0	0	0	0	0	0	0	0	0	0	0	0	0	0	0	0	0	0	0	0	0	0	0	0	0	0	0	0	0	n	Acidobacteria	0.8	Acidobacteria_Gp22	0.37									Gp22	0.37
Otu545	0	0	0	0	0	0	0	0	0	0	0	0	0	0	0	0	0	0	0	0	0	0	0	0	0	0	0	0	0	0	n	Chloroflexi	0.7	Dehalococcoidia	0.4			Dehalococcoidales	0.4			Dehalococcoidaceae	0.4	Dehalococcoides	0.4
Otu546	0	0	0	0	0	0	0	0	0	0	0	0	0	0	0	0	0	0	0	0	0	0	0	0	0	0	0	0	0	0	n	Proteobacteria	1	Betaproteobacteria	0.99			Burkholderiales	0.94			Burkholderiaceae	0.84	Lautropia	0.84
Otu547	0	0	0	0	0	11	0	0	0	0	0	0	0	0	0	0	0	0	0	0	0.000469063	0	0	0	0	0	0	0	0	0	n	Proteobacteria	0.98	Gammaproteobacteria	0.92			Legionellales	0.64			Coxiellaceae	0.64	Diplorickettsia	0.4
Otu548	0	0	0	0	0	0	0	0	0	0	0	0	0	0	0	0	0	0	0	0	0	0	0	0	0	0	0	0	0	0	n	Acidobacteria	1	Acidobacteria_Gp3	0.98									Bryobacter	0.61
Otu549	0	0	0	0	0	0	0	0	0	0	0	0	0	0	0	0	0	0	0	0	0	0	0	0	0	0	0	0	0	0	n	Proteobacteria	0.98	Gammaproteobacteria	0.96			Legionellales	0.41			Coxiellaceae	0.41	Coxiella	0.38
Otu55	0	0	0	0	0	0	0	0	0	0	0	0	0	0	0	0	0	0	0	0	0	0	0	0	0	0	0	0	0	0	n	Proteobacteria	1	Betaproteobacteria	1			Rhodocyclales	0.74			Rhodocyclaceae	0.74	Methyloversatilis	0.62
Otu550	0	0	0	0	0	0	0	0	0	0	0	0	0	0	0	0	0	0	0	0	0	0	0	0	0	0	0	0	0	0	n	Proteobacteria	1	Alphaproteobacteria	0.99			Rhizobiales	0.93			Rhizobiaceae	0.44	Kaistia	0.44
Otu551	0	0	0	0	0	0	0	0	0	0	0	0	0	0	0	0	0	0	0	0	0	0	0	0	0	0	0	0	0	0	n	Acidobacteria	0.4	Acidobacteria_Gp1	0.24									Candidatus Koribacter	0.13
Otu552	0	0	0	0	0	0	0	0	0	0	0	0	0	0	0	0	0	0	0	0	0	0	0	0	0	0	0	0	0	0	n	Proteobacteria	1	Alphaproteobacteria	1			Rhizobiales	0.99			Phyllobacteriaceae	0.94	Mesorhizobium	0.64
Otu553	0	0	0	0	0	0	0	0	0	0	0	0	0	0	0	0	0	0	0	0	0	0	0	0	0	0	0	0	0	0	n	Firmicutes	1	Bacilli	1			Bacillales	1			Bacillaceae 1	0.59	Bacillus	0.59
Otu554	0	0	0	0	0	0	0	0	0	0	0	0	0	0	0	0	0	0	0	0	0	0	0	0	0	0	0	0	0	0	n	Proteobacteria	1	Alphaproteobacteria	1			Rhodospirillales	1			Acetobacteraceae	0.95	Acidisphaera	0.65
Otu555	0	0	0	0	0	0	0	0	0	0	0	0	0	0	0	0	0	0	0	0	0	0	0	0	0	0	0	0	0	0	n	Proteobacteria	1	Alphaproteobacteria	1			Sneathiellales	0.72			Sneathiellaceae	0.72	Taonella	0.69
Otu556	0	0	0	0	0	0	0	0	0	0	0	0	0	0	0	0	0	0	0	0	0	0	0	0	0	0	0	0	0	0	n	Proteobacteria	1	Alphaproteobacteria	0.97			Rhizobiales	0.94			Hyphomicrobiaceae	0.67	Devosia	0.49
Otu557	0	0	0	0	0	0	0	0	0	0	0	0	0	0	0	0	0	0	0	0	0	0	0	0	0	0	0	0	0	0	n	Proteobacteria	1	Alphaproteobacteria	1			Rhodospirillales	0.78			Rhodospirillaceae	0.51	Dongia	0.5
Otu558	0	0	0	0	0	0	0	0	0	0	0	0	0	0	0	0	0	0	0	0	0	0	0	0	0	0	0	0	0	0	n	Bacteroidetes	0.99	Flavobacteriia	0.24			"Flavobacteriales"	0.24			Cryomorphaceae	0.21	Cryomorpha	0.21
Otu559	0	0	0	0	0	0	0	0	0	0	0	0	0	0	0	0	0	0	0	0	0	0	0	0	0	0	0	0	0	0	n	Actinobacteria	1	Actinobacteria	1	Actinobacteridae	1	Actinomycetales	1	Propionibacterineae	1	Nocardioidaceae	1	Nocardioides	1
Otu56	0	0	0	0	0	0	0	0	0	0	0	0	0	0	0	0	0	0	0	0	0	0	0	0	0	0	0	0	0	0	n	Proteobacteria	1	Betaproteobacteria	0.96			Neisseriales	0.34			Neisseriaceae	0.34	Pseudogulbenkiania	0.27
Otu560	0	0	0	0	0	0	0	0	0	0	0	0	0	0	0	0	0	0	0	0	0	0	0	0	0	0	0	0	0	0	n	Firmicutes	1	Bacilli	0.99			Bacillales	0.99			Paenibacillaceae 1	0.98	Paenibacillus	0.91
Otu561	0	0	0	0	0	0	0	0	0	0	0	0	0	0	0	0	0	0	0	0	0	0	0	0	0	0	0	0	0	0	n	Proteobacteria	1	Betaproteobacteria	0.96			Rhodocyclales	0.54			Rhodocyclaceae	0.54	Sulfuritalea	0.18
Otu562	0	0	0	0	0	0	0	0	0	0	0	0	0	0	0	0	0	0	0	0	0	0	0	0	0	0	0	0	0	0	n	Proteobacteria	1	Gammaproteobacteria	1			Chromatiales	0.59			Chromatiaceae	0.32	Thiohalocapsa	0.21
Otu563	0	0	0	0	0	0	0	0	0	0	0	0	0	0	0	0	0	0	0	0	0	0	0	0	0	0	0	0	0	0	n	Actinobacteria	0.76	Actinobacteria	0.76	Actinobacteridae	0.45	Actinomycetales	0.45	Micromonosporineae	0.31	Micromonosporaceae	0.31	Rhizocola	0.19
Otu564	0	0	0	0	0	0	0	0	0	0	0	0	0	0	0	0	0	0	0	0	0	0	0	0	0	0	0	0	0	0	n	Actinobacteria	1	Actinobacteria	1	Actinobacteridae	1	Actinomycetales	1	Micrococcineae	1	Demequinaceae	1	Demequina	1
Otu565	0	0	0	0	0	0	0	0	0	0	0	0	0	0	0	0	0	0	0	0	0	0	0	0	0	0	0	0	0	0	n	Proteobacteria	0.82	Alphaproteobacteria	0.78			Rhodospirillales	0.15			Rhodospirillaceae	0.15	Elstera	0.14
Otu566	0	0	0	0	0	0	0	0	0	0	0	0	0	0	0	0	0	0	0	0	0	0	0	0	0	0	0	0	0	0	n	Proteobacteria	0.86	Deltaproteobacteria	0.84			Syntrophobacterales	0.56			Syntrophobacteraceae	0.5	Desulfoglaeba	0.47
Otu567	0	0	0	0	0	0	0	0	0	0	0	0	0	0	0	0	0	0	0	0	0	0	0	0	0	0	0	0	0	0	n	Acidobacteria	1	Acidobacteria_Gp3	1									Bryobacter	0.42
Otu568	0	0	0	0	0	0	0	0	0	0	0	0	0	0	0	0	0	0	0	0	0	0	0	0	0	0	0	0	0	0	n	Actinobacteria	1	Actinobacteria	1	Actinobacteridae	0.99	Actinomycetales	0.99	Frankineae	0.91	Cryptosporangiaceae	0.86	Jatrophihabitans	0.86
Otu569	0	0	0	0	0	0	0	0	0	0	0	0	0	0	0	0	0	0	0	0	0	0	0	0	0	0	0	0	0	0	n	Actinobacteria	0.95	Actinobacteria	0.95	Coriobacteridae	0.55	Coriobacteriales	0.55	"Coriobacterineae"	0.55	Coriobacteriaceae	0.55	Parvibacter	0.38
Otu57	54	64	35	159	102	43	57	55	53	87	44	11	11	3	6	0.0015375	0.00270716	0.00128149	0.00421304	0.00375166	0.00183361	0.00149207	0.00141268	0.00131985	0.00174122	0.000646099	0.000260664	0.000207602	5.22284e-05	0.000106185	n	Cyanobacteria/Chloroplast	1	Chloroplast	1							Chloroplast	1	Streptophyta	1
Otu570	0	0	0	0	0	0	0	1	0	0	0	0	0	0	0	0	0	0	0	0	0	0	2.56852e-05	0	0	0	0	0	0	0	n	Proteobacteria	0.99	Gammaproteobacteria	0.87			Legionellales	0.49			Coxiellaceae	0.49	Diplorickettsia	0.48
Otu571	0	0	0	0	0	0	0	0	0	0	0	0	0	0	0	0	0	0	0	0	0	0	0	0	0	0	0	0	0	0	n	Proteobacteria	0.94	Gammaproteobacteria	0.86			Xanthomonadales	0.7			Sinobacteraceae	0.7	Steroidobacter	0.28
Otu572	0	0	0	0	0	0	0	0	0	0	0	0	0	0	0	0	0	0	0	0	0	0	0	0	0	0	0	0	0	0	n	Verrucomicrobia	1	Subdivision3	1									Subdivision3_genera_incertae_sedis	1
Otu573	0	0	0	0	0	0	0	0	0	0	0	0	0	0	0	0	0	0	0	0	0	0	0	0	0	0	0	0	0	0	n	Acidobacteria	1	Acidobacteria_Gp7	1									Gp7	1
Otu574	0	0	0	0	0	0	0	0	0	0	0	0	0	0	0	0	0	0	0	0	0	0	0	0	0	0	0	0	0	0	n	Proteobacteria	0.9	Deltaproteobacteria	0.78			Desulfuromonadales	0.57			Geobacteraceae	0.56	Geothermobacter	0.55
Otu575	0	0	0	0	0	0	0	0	0	0	0	0	0	0	0	0	0	0	0	0	0	0	0	0	0	0	0	0	0	0	n	Proteobacteria	0.75	Alphaproteobacteria	0.44			Rhodospirillales	0.27			Rhodospirillaceae	0.25	Telmatospirillum	0.05
Otu576	0	0	0	0	0	0	0	0	0	0	0	0	0	0	0	0	0	0	0	0	0	0	0	0	0	0	0	0	0	0	n	Proteobacteria	0.65	Gammaproteobacteria	0.34			Gammaproteobacteria_incertae_sedis	0.32					Candidatus Carsonella	0.32
Otu577	0	0	0	0	0	0	0	0	0	0	0	0	0	0	0	0	0	0	0	0	0	0	0	0	0	0	0	0	0	0	n	Proteobacteria	0.92	Alphaproteobacteria	0.87			Rhizobiales	0.86			Xanthobacteraceae	0.41	Pseudolabrys	0.41
Otu578	0	0	0	0	0	0	0	0	0	0	0	0	0	0	0	0	0	0	0	0	0	0	0	0	0	0	0	0	0	0	n	Actinobacteria	1	Actinobacteria	1	Actinobacteridae	1	Actinomycetales	1	Frankineae	1			Motilibacter	1
Otu579	0	0	0	0	0	0	0	0	0	0	0	0	0	0	0	0	0	0	0	0	0	0	0	0	0	0	0	0	0	0	n	Proteobacteria	0.8	Deltaproteobacteria	0.68			Desulfuromonadales	0.27			Geobacteraceae	0.27	Geothermobacter	0.22
Otu58	0	0	0	0	0	18	4	2	0	0	0	0	0	0	0	0	0	0	0	0	0.000767558	0.000104707	5.13703e-05	0	0	0	0	0	0	0	n	Proteobacteria	1	Alphaproteobacteria	1			Rhizobiales	1			Hyphomicrobiaceae	0.99	Devosia	0.99
Otu580	0	0	0	0	0	0	0	0	0	0	0	0	0	0	0	0	0	0	0	0	0	0	0	0	0	0	0	0	0	0	n	Acidobacteria	1	Acidobacteria_Gp1	1									Bryocella	0.56
Otu581	0	0	0	0	0	0	0	0	0	0	0	0	0	0	0	0	0	0	0	0	0	0	0	0	0	0	0	0	0	0	n	Actinobacteria	0.79	Actinobacteria	0.79	Rubrobacteridae	0.72	Gaiellales	0.71			Gaiellaceae	0.71	Gaiella	0.71
Otu582	0	0	0	0	0	0	0	0	0	0	0	0	0	0	0	0	0	0	0	0	0	0	0	0	0	0	0	0	0	0	n	Actinobacteria	0.71	Actinobacteria	0.71	Rubrobacteridae	0.3	Gaiellales	0.3			Gaiellaceae	0.3	Gaiella	0.3
Otu583	0	0	0	0	0	0	0	0	0	0	0	0	0	0	0	0	0	0	0	0	0	0	0	0	0	0	0	0	0	0	n	Proteobacteria	1	Betaproteobacteria	0.99			Rhodocyclales	0.44			Rhodocyclaceae	0.44	Azospira	0.35
Otu584	0	0	0	0	0	0	0	0	0	0	0	0	0	0	0	0	0	0	0	0	0	0	0	0	0	0	0	0	0	0	n	Acidobacteria	0.59	Acidobacteria_Gp22	0.3									Gp22	0.3
Otu585	0	0	0	0	0	0	0	0	0	0	0	0	0	0	0	0	0	0	0	0	0	0	0	0	0	0	0	0	0	0	n	Acidobacteria	0.45	Holophagae	0.21			Holophagales	0.2			Holophagaceae	0.2	Geothrix	0.17
Otu586	0	0	0	0	0	0	0	0	0	0	0	0	0	0	0	0	0	0	0	0	0	0	0	0	0	0	0	0	0	0	n	Proteobacteria	0.77	Deltaproteobacteria	0.56			Syntrophobacterales	0.45			Syntrophobacteraceae	0.45	Desulfovirga	0.44
Otu587	0	0	0	0	0	0	0	0	0	0	0	0	0	0	0	0	0	0	0	0	0	0	0	0	0	0	0	0	0	0	n	Actinobacteria	1	Actinobacteria	1	Actinobacteridae	1	Actinomycetales	1	Micrococcineae	0.96	Brevibacteriaceae	0.6	Spelaeicoccus	0.57
Otu588	0	0	0	0	0	0	0	0	0	0	0	0	0	0	0	0	0	0	0	0	0	0	0	0	0	0	0	0	0	0	n	Proteobacteria	0.99	Alphaproteobacteria	0.96			Rhizobiales	0.88			Hyphomicrobiaceae	0.4	Aquabacter	0.19
Otu589	0	0	0	0	0	0	0	0	0	0	0	0	0	0	0	0	0	0	0	0	0	0	0	0	0	0	0	0	0	0	n	Proteobacteria	1	Betaproteobacteria	1			Rhodocyclales	0.98			Rhodocyclaceae	0.98	Georgfuchsia	0.98
Otu59	0	0	0	0	0	2	0	0	0	0	98	69	20	20	57	0	0	0	0	0	8.52842e-05	0	0	0	0	0.00143904	0.00163507	0.000377458	0.000348189	0.00100876	n	Proteobacteria	1	Alphaproteobacteria	0.97			Sphingomonadales	0.97			Sphingomonadaceae	0.94	Sphingomonas	0.67
Otu590	0	0	0	0	0	0	0	0	0	0	0	0	0	0	0	0	0	0	0	0	0	0	0	0	0	0	0	0	0	0	n	Actinobacteria	0.97	Actinobacteria	0.95	Rubrobacteridae	0.91	Solirubrobacterales	0.9			Conexibacteraceae	0.61	Conexibacter	0.61
Otu591	0	0	0	0	0	0	0	0	0	0	0	0	0	0	0	0	0	0	0	0	0	0	0	0	0	0	0	0	0	0	n	Proteobacteria	1	Gammaproteobacteria	0.91			Xanthomonadales	0.88			Sinobacteraceae	0.83	Povalibacter	0.81
Otu592	0	0	0	0	0	119	146	574	177	467	1	0	0	0	0	0	0	0	0	0	0.00507441	0.00382179	0.0147433	0.00440781	0.00934654	1.46841e-05	0	0	0	0	n	Proteobacteria	1	Gammaproteobacteria	1			Pseudomonadales	0.99			Pseudomonadaceae	0.99	Pseudomonas	0.92
Otu593	0	0	0	0	0	0	0	0	0	0	0	0	0	0	0	0	0	0	0	0	0	0	0	0	0	0	0	0	0	0	n	Proteobacteria	0.99	Alphaproteobacteria	0.98			Sneathiellales	0.27			Sneathiellaceae	0.27	Taonella	0.18
Otu595	0	0	0	0	0	0	0	0	0	0	0	0	0	0	0	0	0	0	0	0	0	0	0	0	0	0	0	0	0	0	n	Acidobacteria	1	Acidobacteria_Gp1	1									Candidatus Koribacter	0.63
Otu596	0	0	0	0	0	3	3	0	3	0	14	8	5	7	9	0	0	0	0	0	0.000127926	7.85299e-05	0	7.47086e-05	0	0.000205577	0.000189573	9.43645e-05	0.000121866	0.000159278	n	Proteobacteria	1	Alphaproteobacteria	0.9			Rhizobiales	0.87			Phyllobacteriaceae	0.83	Lentilitoribacter	0.81
Otu597	0	0	0	0	0	91	20	3	17	0	3	3	0	0	16	0	0	0	0	0	0.00388043	0.000523533	7.70555e-05	0.000423349	0	4.40522e-05	7.109e-05	0	0	0.000283161	n	Proteobacteria	1	Gammaproteobacteria	1			Xanthomonadales	0.45			Xanthomonadaceae	0.45	Luteibacter	0.45
Otu598	0	0	0	0	0	0	0	0	0	0	0	0	0	0	0	0	0	0	0	0	0	0	0	0	0	0	0	0	0	0	n	Proteobacteria	1	Alphaproteobacteria	1			Rhizobiales	0.94			Xanthobacteraceae	0.46	Pseudoxanthobacter	0.32
Otu599	0	0	0	0	0	0	0	0	0	0	0	0	0	0	0	0	0	0	0	0	0	0	0	0	0	0	0	0	0	0	n	Proteobacteria	1	Gammaproteobacteria	0.99			Xanthomonadales	0.77			Sinobacteraceae	0.77	Steroidobacter	0.38
Otu60	0	359	54	0	52	463	203	181	45	3	1	0	0	0	0	0	0.0151855	0.00197715	0	0.00191261	0.0197433	0.00531386	0.00464901	0.00112063	6.0042e-05	1.46841e-05	0	0	0	0	n	Actinobacteria	1	Actinobacteria	1	Actinobacteridae	1	Actinomycetales	1	Micrococcineae	1	Microbacteriaceae	1	Curtobacterium	1
Otu600	0	0	0	0	0	0	0	0	0	0	0	0	0	0	0	0	0	0	0	0	0	0	0	0	0	0	0	0	0	0	n	Actinobacteria	0.9	Actinobacteria	0.82	Coriobacteridae	0.33	Coriobacteriales	0.33	"Coriobacterineae"	0.33	Coriobacteriaceae	0.33	Paraeggerthella	0.23
Otu601	0	0	0	0	0	0	0	0	0	0	0	0	0	0	0	0	0	0	0	0	0	0	0	0	0	0	0	0	0	0	n	Proteobacteria	1	Alphaproteobacteria	1			Rhodospirillales	1			Acetobacteraceae	0.98	Belnapia	0.22
Otu602	0	0	0	0	0	0	0	0	0	0	0	0	0	0	0	0	0	0	0	0	0	0	0	0	0	0	0	0	0	0	n	Proteobacteria	0.98	Deltaproteobacteria	0.92			Myxococcales	0.86	Sorangiineae	0.84	Phaselicystidaceae	0.55	Phaselicystis	0.55
Otu603	0	0	0	0	0	0	0	0	0	0	0	0	0	0	0	0	0	0	0	0	0	0	0	0	0	0	0	0	0	0	n	Acidobacteria	1	Acidobacteria_Gp3	1									Candidatus Solibacter	0.98
Otu604	0	0	0	0	0	0	0	0	0	0	4	1	2	0	1	0	0	0	0	0	0	0	0	0	0	5.87363e-05	2.36967e-05	3.77458e-05	0	1.76975e-05	n	Proteobacteria	1	Gammaproteobacteria	0.82			Xanthomonadales	0.82			Xanthomonadaceae	0.82	Fulvimonas	0.52
Otu605	0	0	0	0	0	0	0	0	0	0	0	0	0	0	0	0	0	0	0	0	0	0	0	0	0	0	0	0	0	0	n	Proteobacteria	1	Alphaproteobacteria	0.98			Rhodospirillales	0.9			Rhodospirillaceae	0.84	Constrictibacter	0.3
Otu606	0	0	0	0	0	0	0	0	0	0	0	0	0	0	0	0	0	0	0	0	0	0	0	0	0	0	0	0	0	0	n	Acidobacteria	0.98	Acidobacteria_Gp5	0.95									Gp5	0.95
Otu607	0	0	0	0	0	0	0	0	0	0	1	0	0	0	0	0	0	0	0	0	0	0	0	0	0	1.46841e-05	0	0	0	0	n	Proteobacteria	1	Alphaproteobacteria	1			Rhizobiales	1			Xanthobacteraceae	1	Labrys	1
Otu608	0	0	0	0	0	0	0	0	0	0	0	0	0	0	0	0	0	0	0	0	0	0	0	0	0	0	0	0	0	0	n	Gemmatimonadetes	0.77	Gemmatimonadetes	0.77			Gemmatimonadales	0.77			Gemmatimonadaceae	0.77	Gemmatimonas	0.77
Otu609	1	10	0	1	0	0	0	0	0	0	0	0	0	0	0	2.84722e-05	0.000422994	0	2.64971e-05	0	0	0	0	0	0	0	0	0	0	0	n	Proteobacteria	1	Alphaproteobacteria	0.96			Rhodospirillales	0.95			Rhodospirillaceae	0.95	Azospirillum	0.94
Otu61	2	0	0	0	0	5	0	0	3	0	379	232	106	152	299	5.69444e-05	0	0	0	0	0.000213211	0	0	7.47086e-05	0	0.00556526	0.00549763	0.00200053	0.00264624	0.00529157	n	Proteobacteria	0.98	Betaproteobacteria	0.98			Rhodocyclales	0.48			Rhodocyclaceae	0.48	Methyloversatilis	0.4
Otu610	0	0	0	0	0	0	0	0	0	0	0	0	0	0	0	0	0	0	0	0	0	0	0	0	0	0	0	0	0	0	n	Gemmatimonadetes	0.71	Gemmatimonadetes	0.71			Gemmatimonadales	0.71			Gemmatimonadaceae	0.71	Gemmatimonas	0.71
Otu611	0	1	0	0	0	1	0	2	0	2	0	0	0	0	0	0	4.22994e-05	0	0	0	4.26421e-05	0	5.13703e-05	0	4.0028e-05	0	0	0	0	0	n	Proteobacteria	0.98	Betaproteobacteria	0.94			Burkholderiales	0.39			Comamonadaceae	0.19	Alicycliphilus	0.1
Otu612	0	0	0	0	0	0	0	0	0	0	0	0	0	0	0	0	0	0	0	0	0	0	0	0	0	0	0	0	0	0	n	Actinobacteria	0.93	Actinobacteria	0.92	Rubrobacteridae	0.21	Gaiellales	0.2			Gaiellaceae	0.2	Gaiella	0.2
Otu613	77	21	10	57	36	7	1	0	2	0	0	0	0	1	1	0.00219236	0.000888287	0.000366139	0.00151033	0.00132411	0.000298495	2.61766e-05	0	4.98058e-05	0	0	0	0	1.74095e-05	1.76975e-05	n	Proteobacteria	1	Betaproteobacteria	1			Burkholderiales	0.87			Alcaligenaceae	0.67	Pigmentiphaga	0.57
Otu614	0	0	0	0	0	0	0	0	0	0	0	0	0	0	0	0	0	0	0	0	0	0	0	0	0	0	0	0	0	0	n	Chlamydiae	0.12	Chlamydiia	0.12			Chlamydiales	0.12			Waddliaceae	0.12	Waddlia	0.12
Otu615	0	0	0	0	0	0	0	0	0	0	0	0	0	0	0	0	0	0	0	0	0	0	0	0	0	0	0	0	0	0	n	Proteobacteria	1	Betaproteobacteria	1			Burkholderiales	0.68			Burkholderiaceae	0.29	Paucimonas	0.06
Otu616	0	0	0	0	0	0	0	3	0	0	0	0	0	0	0	0	0	0	0	0	0	0	7.70555e-05	0	0	0	0	0	0	0	n	Proteobacteria	1	Alphaproteobacteria	1			Rhizobiales	1			Hyphomicrobiaceae	1	Devosia	0.95
Otu617	0	0	0	0	0	0	0	0	0	0	0	0	0	0	0	0	0	0	0	0	0	0	0	0	0	0	0	0	0	0	n	Gemmatimonadetes	0.64	Gemmatimonadetes	0.64			Gemmatimonadales	0.64			Gemmatimonadaceae	0.64	Gemmatimonas	0.64
Otu618	0	0	0	0	0	0	0	0	0	0	0	0	0	0	0	0	0	0	0	0	0	0	0	0	0	0	0	0	0	0	n	Chlamydiae	0.26	Chlamydiia	0.26			Chlamydiales	0.26			Parachlamydiaceae	0.26	Neochlamydia	0.23
Otu619	0	0	0	0	0	0	0	0	0	0	0	0	0	0	0	0	0	0	0	0	0	0	0	0	0	0	0	0	0	0	n	Proteobacteria	1	Alphaproteobacteria	1			Rhodospirillales	1			Acetobacteraceae	0.84	Paracraurococcus	0.43
Otu62	0	0	0	0	0	18	0	474	1	0	0	0	0	0	0	0	0	0	0	0	0.000767558	0	0.0121748	2.49029e-05	0	0	0	0	0	0	n	Actinobacteria	1	Actinobacteria	1	Actinobacteridae	1	Actinomycetales	1	Corynebacterineae	1	Corynebacterineae_incertae_sedis	0.42	Tomitella	0.42
Otu620	0	0	0	0	0	0	0	0	0	0	0	0	0	0	0	0	0	0	0	0	0	0	0	0	0	0	0	0	0	0	n	Proteobacteria	1	Alphaproteobacteria	1			Rhodospirillales	0.98			Acetobacteraceae	0.97	Granulibacter	0.09
Otu621	0	0	0	10	0	0	0	0	0	0	0	0	0	0	0	0	0	0	0.000264971	0	0	0	0	0	0	0	0	0	0	0	n	Proteobacteria	0.97	Alphaproteobacteria	0.91			Rhodospirillales	0.87			Rhodospirillaceae	0.87	Lacibacterium	0.73
Otu622	0	0	0	0	0	0	0	0	0	0	0	0	0	0	0	0	0	0	0	0	0	0	0	0	0	0	0	0	0	0	n	Firmicutes	1	Clostridia	1			Clostridiales	1			Lachnospiraceae	1	Clostridium XlVa	0.67
Otu623	0	0	0	0	0	9	0	0	0	0	2	0	0	0	0	0	0	0	0	0	0.000383779	0	0	0	0	2.93681e-05	0	0	0	0	n	Chlamydiae	1	Chlamydiia	1			Chlamydiales	1			Parachlamydiaceae	1	Parachlamydia	0.83
Otu624	0	0	0	0	0	0	0	0	0	0	0	0	0	0	0	0	0	0	0	0	0	0	0	0	0	0	0	0	0	0	n	Proteobacteria	1	Gammaproteobacteria	0.97			Pseudomonadales	0.2			Pseudomonadaceae	0.2	Permianibacter	0.2
Otu625	0	0	0	0	0	0	0	0	0	0	0	0	0	0	0	0	0	0	0	0	0	0	0	0	0	0	0	0	0	0	n	Proteobacteria	0.9	Betaproteobacteria	0.35			Sulfuricellales	0.15			Sulfuricellaceae	0.15	Sulfuricella	0.15
Otu626	0	0	0	0	0	0	0	0	0	0	0	0	0	0	0	0	0	0	0	0	0	0	0	0	0	0	0	0	0	0	n	Actinobacteria	0.98	Actinobacteria	0.98	Actinobacteridae	0.96	Actinomycetales	0.96	Micromonosporineae	0.47	Micromonosporaceae	0.47	Allocatelliglobosispora	0.31
Otu627	0	0	0	0	0	0	0	0	0	0	0	0	0	0	0	0	0	0	0	0	0	0	0	0	0	0	0	0	0	0	n	Armatimonadetes	1	Armatimonadia	0.99			Armatimonadales	0.99			Armatimonadaceae	0.99	Armatimonas/Armatimonadetes_gp1	0.99
Otu628	0	0	0	0	0	0	0	0	0	0	0	0	0	0	0	0	0	0	0	0	0	0	0	0	0	0	0	0	0	0	n	Gemmatimonadetes	0.8	Gemmatimonadetes	0.8			Gemmatimonadales	0.8			Gemmatimonadaceae	0.8	Gemmatimonas	0.8
Otu629	0	0	0	0	0	0	0	0	0	0	0	0	0	0	0	0	0	0	0	0	0	0	0	0	0	0	0	0	0	0	n	Acidobacteria	1	Acidobacteria_Gp3	1									Candidatus Solibacter	0.96
Otu63	0	0	0	0	0	0	0	0	0	0	0	0	0	0	0	0	0	0	0	0	0	0	0	0	0	0	0	0	0	0	n	Proteobacteria	0.99	Betaproteobacteria	0.98			Rhodocyclales	0.37			Rhodocyclaceae	0.37	Uliginosibacterium	0.28
Otu630	0	0	0	0	0	0	0	0	0	0	0	0	0	0	0	0	0	0	0	0	0	0	0	0	0	0	0	0	0	0	n	Proteobacteria	1	Alphaproteobacteria	1			Sphingomonadales	1			Sphingomonadaceae	1	Rhizorhabdus	0.99
Otu631	0	0	0	0	0	0	0	0	0	0	0	0	0	0	0	0	0	0	0	0	0	0	0	0	0	0	0	0	0	0	n	Actinobacteria	1	Actinobacteria	1	Actinobacteridae	1	Actinomycetales	1	Streptomycineae	1	Streptomycetaceae	1	Streptomyces	1
Otu632	0	0	0	0	0	0	0	0	0	0	0	0	0	0	0	0	0	0	0	0	0	0	0	0	0	0	0	0	0	0	n	Chloroflexi	0.73	Thermomicrobia	0.57			Thermomicrobiales	0.44			Thermomicrobiaceae	0.44	Thermorudis	0.42
Otu633	0	0	0	0	0	0	0	0	0	0	0	0	0	0	0	0	0	0	0	0	0	0	0	0	0	0	0	0	0	0	n	Proteobacteria	0.87	Deltaproteobacteria	0.62			Myxococcales	0.27	Cystobacterineae	0.26	Myxococcaceae	0.19	Aggregicoccus	0.1
Otu634	0	0	0	0	0	0	0	0	0	0	0	0	0	0	0	0	0	0	0	0	0	0	0	0	0	0	0	0	0	0	n	Proteobacteria	0.51	Deltaproteobacteria	0.36			Syntrophobacterales	0.14			Syntrophobacteraceae	0.14	Desulfoglaeba	0.12
Otu635	0	0	0	0	0	0	0	0	0	0	0	0	0	0	0	0	0	0	0	0	0	0	0	0	0	0	0	0	0	0	n	Firmicutes	0.35	Clostridia	0.19			Clostridiales	0.16			Heliobacteriaceae	0.03	Hydrogenispora	0.03
Otu636	0	0	0	0	0	0	0	0	0	0	0	0	0	0	0	0	0	0	0	0	0	0	0	0	0	0	0	0	0	0	n	Firmicutes	1	Bacilli	0.99			Bacillales	0.99			Paenibacillaceae 1	0.99	Paenibacillus	0.98
Otu637	0	0	0	0	0	0	0	0	0	0	0	0	0	0	1	0	0	0	0	0	0	0	0	0	0	0	0	0	0	1.76975e-05	n	Proteobacteria	1	Betaproteobacteria	0.99			Burkholderiales	0.97			Oxalobacteraceae	0.86	Telluria	0.36
Otu638	0	0	0	0	0	0	0	0	0	0	0	0	0	0	0	0	0	0	0	0	0	0	0	0	0	0	0	0	0	0	n	Proteobacteria	0.93	Betaproteobacteria	0.89			Burkholderiales	0.68			Burkholderiales_incertae_sedis	0.44	Ideonella	0.36
Otu639	0	0	0	0	0	0	0	0	0	0	0	0	0	0	0	0	0	0	0	0	0	0	0	0	0	0	0	0	0	0	n	Actinobacteria	0.67	Actinobacteria	0.67	Actinobacteridae	0.67	Actinomycetales	0.67	Micromonosporineae	0.67	Micromonosporaceae	0.67	Xiangella	0.64
Otu64	6	0	0	5	0	350	123	208	184	0	57	74	30	9	53	0.000170833	0	0	0.000132485	0	0.0149247	0.00321973	0.00534251	0.00458213	0	0.000836992	0.00175355	0.000566187	0.000156685	0.00093797	n	Actinobacteria	1	Actinobacteria	1	Actinobacteridae	1	Actinomycetales	1	Micrococcineae	1	Microbacteriaceae	1	Leifsonia	0.79
Otu640	0	0	0	0	0	0	0	0	0	0	0	0	0	0	0	0	0	0	0	0	0	0	0	0	0	0	0	0	0	0	n	Proteobacteria	0.65	Alphaproteobacteria	0.62			Rhizobiales	0.6			Xanthobacteraceae	0.36	Pseudolabrys	0.36
Otu641	0	0	0	0	0	0	0	0	0	0	0	0	0	0	0	0	0	0	0	0	0	0	0	0	0	0	0	0	0	0	n	Verrucomicrobia	1	Subdivision3	1									Subdivision3_genera_incertae_sedis	1
Otu642	0	0	0	0	0	0	0	0	0	0	0	0	0	0	0	0	0	0	0	0	0	0	0	0	0	0	0	0	0	0	n	Chloroflexi	0.58	Thermomicrobia	0.49			Thermomicrobiales	0.33			Thermomicrobiaceae	0.33	Thermorudis	0.33
Otu643	0	0	0	0	0	0	0	0	0	0	0	0	0	0	0	0	0	0	0	0	0	0	0	0	0	0	0	0	0	0	n	Proteobacteria	1	Alphaproteobacteria	1			Rhodospirillales	1			Acetobacteraceae	1	Ameyamaea	0.2
Otu644	0	0	0	0	0	0	0	0	0	0	0	0	0	0	0	0	0	0	0	0	0	0	0	0	0	0	0	0	0	0	n	Planctomycetes	0.48	Phycisphaerae	0.24			Phycisphaerales	0.2			Phycisphaeraceae	0.2	Phycisphaera	0.2
Otu645	0	0	0	0	0	0	0	0	0	0	0	0	0	0	0	0	0	0	0	0	0	0	0	0	0	0	0	0	0	0	n	Acidobacteria	0.72	Acidobacteria_Gp1	0.72									Telmatobacter	0.54
Otu646	0	0	0	0	0	0	0	0	0	0	0	0	0	0	0	0	0	0	0	0	0	0	0	0	0	0	0	0	0	0	n	Proteobacteria	1	Alphaproteobacteria	1			Rhodospirillales	1			Acetobacteraceae	1	Asaia	0.37
Otu647	0	0	0	0	0	0	0	0	0	0	0	0	0	0	0	0	0	0	0	0	0	0	0	0	0	0	0	0	0	0	n	Bacteroidetes	1	Flavobacteriia	1			"Flavobacteriales"	1			Flavobacteriaceae	1	Flavobacterium	0.75
Otu648	0	0	0	0	0	0	0	0	0	0	0	0	0	0	0	0	0	0	0	0	0	0	0	0	0	0	0	0	0	0	n	Proteobacteria	1	Deltaproteobacteria	1			Myxococcales	1	Sorangiineae	1	Polyangiaceae	0.99	Polyangium	0.46
Otu649	0	0	0	0	0	0	0	0	0	0	0	0	0	0	0	0	0	0	0	0	0	0	0	0	0	0	0	0	0	0	n	Bacteroidetes	0.89	Cytophagia	0.56			Cytophagales	0.56			Cytophagaceae	0.46	Nibribacter	0.36
Otu65	0	0	0	0	0	0	0	0	0	0	0	0	0	0	0	0	0	0	0	0	0	0	0	0	0	0	0	0	0	0	n	Proteobacteria	1	Alphaproteobacteria	1			Rhizobiales	0.98			Beijerinckiaceae	0.78	Camelimonas	0.53
Otu650	0	0	0	0	0	0	0	0	0	0	0	0	0	0	0	0	0	0	0	0	0	0	0	0	0	0	0	0	0	0	n	Actinobacteria	0.48	Actinobacteria	0.36	Rubrobacteridae	0.12	Gaiellales	0.1			Gaiellaceae	0.1	Gaiella	0.1
Otu651	0	0	0	0	0	0	0	0	0	0	0	0	0	0	0	0	0	0	0	0	0	0	0	0	0	0	0	0	0	0	n	Actinobacteria	1	Actinobacteria	1	Actinobacteridae	1	Actinomycetales	1	Streptomycineae	1	Streptomycetaceae	1	Streptomyces	0.97
Otu652	0	0	0	0	0	0	0	0	0	0	0	0	0	0	0	0	0	0	0	0	0	0	0	0	0	0	0	0	0	0	n	Acidobacteria	1	Acidobacteria_Gp3	1									Gp3	0.63
Otu653	0	0	0	0	0	0	0	0	0	0	0	0	0	0	0	0	0	0	0	0	0	0	0	0	0	0	0	0	0	0	n	Proteobacteria	0.71	Deltaproteobacteria	0.51			Myxococcales	0.25			Sandaracinaceae	0.24	Sandaracinus	0.24
Otu654	0	0	0	0	0	0	0	0	0	0	0	0	0	0	0	0	0	0	0	0	0	0	0	0	0	0	0	0	0	0	n	Actinobacteria	1	Actinobacteria	1	Rubrobacteridae	1	Gaiellales	0.99			Gaiellaceae	0.99	Gaiella	0.99
Otu655	0	0	0	0	0	0	0	0	0	0	0	0	0	0	0	0	0	0	0	0	0	0	0	0	0	0	0	0	0	0	n	Proteobacteria	0.6	Alphaproteobacteria	0.51			Rhizobiales	0.5			Hyphomicrobiaceae	0.33	Aquabacter	0.27
Otu656	0	0	0	0	0	0	0	0	0	0	0	0	0	0	0	0	0	0	0	0	0	0	0	0	0	0	0	0	0	0	n	Bacteroidetes	1	Flavobacteriia	1			"Flavobacteriales"	1			Flavobacteriaceae	1	Flavobacterium	0.94
Otu657	0	0	0	0	0	0	0	0	0	0	0	0	0	0	0	0	0	0	0	0	0	0	0	0	0	0	0	0	0	0	n	Proteobacteria	1	Alphaproteobacteria	1			Sphingomonadales	0.88			Erythrobacteraceae	0.4	Croceicoccus	0.1
Otu658	0	0	0	0	0	0	1	0	1	3	0	0	0	0	0	0	0	0	0	0	0	2.61766e-05	0	2.49029e-05	6.0042e-05	0	0	0	0	0	n	Bacteroidetes	1	Sphingobacteriia	1			"Sphingobacteriales"	1			Sphingobacteriaceae	1	Mucilaginibacter	1
Otu659	0	0	0	0	0	0	0	0	0	0	0	0	0	0	0	0	0	0	0	0	0	0	0	0	0	0	0	0	0	0	n	Proteobacteria	0.95	Alphaproteobacteria	0.95			Rhodospirillales	0.91			Rhodospirillaceae	0.86	Nitrospirillum	0.37
Otu66	0	0	0	0	0	0	0	0	0	0	0	0	0	0	0	0	0	0	0	0	0	0	0	0	0	0	0	0	0	0	n	Proteobacteria	1	Betaproteobacteria	0.98			Rhodocyclales	0.49			Rhodocyclaceae	0.49	Azospira	0.45
Otu660	0	0	0	0	0	0	0	0	0	0	0	0	0	0	0	0	0	0	0	0	0	0	0	0	0	0	0	0	0	0	n	Proteobacteria	1	Alphaproteobacteria	1			Rhizobiales	1			Xanthobacteraceae	0.96	Xanthobacter	0.96
Otu661	0	0	0	0	0	0	0	0	0	0	0	0	0	0	0	0	0	0	0	0	0	0	0	0	0	0	0	0	0	0	n	Proteobacteria	0.98	Gammaproteobacteria	0.94			Chromatiales	0.45			Ectothiorhodospiraceae	0.22	Thioalbus	0.21
Otu662	0	0	0	0	0	0	0	0	0	0	0	0	0	0	0	0	0	0	0	0	0	0	0	0	0	0	0	0	0	0	n	Proteobacteria	1	Alphaproteobacteria	1			Sphingomonadales	1			Sphingomonadaceae	1	Sphingomonas	0.99
Otu663	0	0	0	0	0	0	0	0	0	0	0	0	0	0	0	0	0	0	0	0	0	0	0	0	0	0	0	0	0	0	n	Proteobacteria	1	Betaproteobacteria	0.72			Burkholderiales	0.64			Oxalobacteraceae	0.64	Pseudoduganella	0.6
Otu664	0	0	0	0	0	0	0	0	0	0	0	0	0	0	0	0	0	0	0	0	0	0	0	0	0	0	0	0	0	0	n	Proteobacteria	1	Alphaproteobacteria	1			Sphingomonadales	0.85			Sphingomonadaceae	0.53	Parablastomonas	0.32
Otu665	0	0	0	0	0	0	0	0	0	0	0	0	0	0	0	0	0	0	0	0	0	0	0	0	0	0	0	0	0	0	n	Bacteroidetes	1	Cytophagia	0.44			Cytophagales	0.44					Chryseolinea	0.18
Otu666	0	0	0	0	0	0	0	0	0	0	0	0	0	0	0	0	0	0	0	0	0	0	0	0	0	0	0	0	0	0	n	Proteobacteria	0.88	Alphaproteobacteria	0.81			Rhizobiales	0.63			Hyphomicrobiaceae	0.26	Aquabacter	0.22
Otu667	0	0	0	0	0	0	0	0	0	0	0	0	0	0	0	0	0	0	0	0	0	0	0	0	0	0	0	0	0	0	n	Actinobacteria	0.82	Actinobacteria	0.52	Rubrobacteridae	0.49	Solirubrobacterales	0.48			Conexibacteraceae	0.28	Conexibacter	0.28
Otu668	0	0	0	0	1	0	0	0	2	5	0	1	0	0	0	0	0	0	0	3.67809e-05	0	0	0	4.98058e-05	0.00010007	0	2.36967e-05	0	0	0	n	Proteobacteria	1	Betaproteobacteria	1			Burkholderiales	1			Comamonadaceae	0.61	Pelomonas	0.59
Otu669	0	0	0	0	0	0	0	0	0	0	0	0	0	0	0	0	0	0	0	0	0	0	0	0	0	0	0	0	0	0	n	Bacteroidetes	0.92	Cytophagia	0.65			Cytophagales	0.65			Cytophagaceae	0.37	Fibrisoma	0.18
Otu67	0	0	0	0	0	0	0	0	0	0	0	0	0	0	2	0	0	0	0	0	0	0	0	0	0	0	0	0	0	3.53951e-05	n	Proteobacteria	1	Alphaproteobacteria	1			Sphingomonadales	1			Sphingomonadaceae	1	Sphingomonas	0.99
Otu670	0	0	0	0	0	0	0	0	0	0	0	0	0	0	0	0	0	0	0	0	0	0	0	0	0	0	0	0	0	0	n	Bacteroidetes	1	Cytophagia	1			Cytophagales	1					Chryseolinea	0.47
Otu671	0	0	0	0	0	0	0	0	0	0	0	0	0	0	0	0	0	0	0	0	0	0	0	0	0	0	0	0	0	0	n	Actinobacteria	0.68	Actinobacteria	0.68	Acidimicrobidae	0.24	Acidimicrobiales	0.24	"Acidimicrobineae"	0.24	"Acidimicrobineae"_incertae_sedis	0.21	Aciditerrimonas	0.21
Otu672	0	0	0	0	0	0	0	0	0	0	0	0	0	0	0	0	0	0	0	0	0	0	0	0	0	0	0	0	0	0	n	Proteobacteria	1	Alphaproteobacteria	1			Rhizobiales	0.98			Hyphomicrobiaceae	0.78	Pelagibacterium	0.63
Otu673	0	0	0	0	0	0	0	0	0	0	0	0	0	0	0	0	0	0	0	0	0	0	0	0	0	0	0	0	0	0	n	Proteobacteria	1	Betaproteobacteria	1			Burkholderiales	0.99			Burkholderiaceae	0.38	Ralstonia	0.27
Otu674	0	0	0	0	0	0	0	0	0	0	0	0	0	0	0	0	0	0	0	0	0	0	0	0	0	0	0	0	0	0	n	Proteobacteria	0.56	Deltaproteobacteria	0.24			Desulfuromonadales	0.09			Desulfuromonadaceae	0.07	Malonomonas	0.07
Otu675	0	0	0	0	0	0	0	0	0	0	0	0	0	0	0	0	0	0	0	0	0	0	0	0	0	0	0	0	0	0	n	Proteobacteria	0.78	Alphaproteobacteria	0.62			Rhizobiales	0.55			Rhodobiaceae	0.26	Dichotomicrobium	0.22
Otu676	0	0	0	0	0	0	0	0	0	0	0	0	0	0	0	0	0	0	0	0	0	0	0	0	0	0	0	0	0	0	n	Proteobacteria	1	Gammaproteobacteria	1			Xanthomonadales	0.97			Sinobacteraceae	0.67	Hydrocarboniphaga	0.58
Otu677	0	0	0	0	0	0	0	0	0	0	0	0	0	0	0	0	0	0	0	0	0	0	0	0	0	0	0	0	0	0	n	Bacteroidetes	0.39	Cytophagia	0.18			Cytophagales	0.18			Flammeovirgaceae	0.09	Flexithrix	0.06
Otu678	0	0	0	0	0	0	0	0	0	0	0	0	0	0	0	0	0	0	0	0	0	0	0	0	0	0	0	0	0	0	n	Proteobacteria	1	Alphaproteobacteria	1			Rhizobiales	1			Bradyrhizobiaceae	0.93	Rhodopseudomonas	0.52
Otu679	0	4	0	0	13	0	0	0	0	0	0	0	0	0	0	0	0.000169198	0	0	0.000478152	0	0	0	0	0	0	0	0	0	0	n	Proteobacteria	0.95	Alphaproteobacteria	0.87			Rhodospirillales	0.49			Rhodospirillaceae	0.46	Lacibacterium	0.12
Otu68	0	0	0	0	0	0	0	0	0	0	0	0	0	0	0	0	0	0	0	0	0	0	0	0	0	0	0	0	0	0	n	Proteobacteria	1	Betaproteobacteria	0.97			Hydrogenophilales	0.41			Hydrogenophilaceae	0.41	Thiobacillus	0.41
Otu680	0	0	0	0	0	0	0	0	0	0	0	0	0	0	1	0	0	0	0	0	0	0	0	0	0	0	0	0	0	1.76975e-05	n	Proteobacteria	0.94	Betaproteobacteria	0.94			Burkholderiales	0.93			Burkholderiaceae	0.57	Paucimonas	0.56
Otu681	0	3	0	0	0	0	0	0	0	0	0	0	0	0	0	0	0.000126898	0	0	0	0	0	0	0	0	0	0	0	0	0	n	Proteobacteria	1	Betaproteobacteria	1			"Procabacteriales"	0.54			"Procabacteriaceae"	0.54	Candidatus Procabacter	0.54
Otu682	0	0	0	0	0	0	0	0	0	0	0	0	0	0	0	0	0	0	0	0	0	0	0	0	0	0	0	0	0	0	n	Chloroflexi	0.47	Ardenticatenia	0.38			Ardenticatenales	0.38			Ardenticatenaceae	0.38	Ardenticatena	0.38
Otu683	0	0	0	0	0	0	0	0	0	0	0	0	0	0	0	0	0	0	0	0	0	0	0	0	0	0	0	0	0	0	n	Proteobacteria	1	Alphaproteobacteria	1			Rhodospirillales	0.62			Acetobacteraceae	0.42	Stella	0.37
Otu684	0	0	0	0	0	0	0	0	0	0	0	0	0	0	0	0	0	0	0	0	0	0	0	0	0	0	0	0	0	0	n	Acidobacteria	1	Acidobacteria_Gp3	1									Bryobacter	0.79
Otu685	0	0	0	0	0	0	0	0	0	0	0	0	0	0	0	0	0	0	0	0	0	0	0	0	0	0	0	0	0	0	n	Proteobacteria	1	Alphaproteobacteria	0.99			Rhizobiales	0.97			Rhizobiales_incertae_sedis	0.73	Bauldia	0.71
Otu686	0	0	0	0	0	0	0	0	0	0	0	0	0	0	0	0	0	0	0	0	0	0	0	0	0	0	0	0	0	0	n	Proteobacteria	1	Betaproteobacteria	0.85			Burkholderiales	0.76			Oxalobacteraceae	0.71	Rugamonas	0.38
Otu687	0	0	0	0	0	0	0	0	0	0	0	0	0	0	0	0	0	0	0	0	0	0	0	0	0	0	0	0	0	0	n	Proteobacteria	0.99	Alphaproteobacteria	0.63			Rhizobiales	0.43			Beijerinckiaceae	0.33	Camelimonas	0.32
Otu688	0	0	0	0	0	0	0	0	0	0	6	2	0	5	10	0	0	0	0	0	0	0	0	0	0	8.81044e-05	4.73934e-05	0	8.70474e-05	0.000176975	n	Proteobacteria	1	Betaproteobacteria	1			Burkholderiales	0.94			Burkholderiaceae	0.61	Paucimonas	0.3
Otu689	0	0	0	0	0	0	0	0	0	0	0	0	0	0	0	0	0	0	0	0	0	0	0	0	0	0	0	0	0	0	n	Proteobacteria	0.88	Oligoflexia	0.39			Oligoflexales	0.39			Oligoflexaceae	0.39	Oligoflexus	0.39
Otu69	0	0	0	0	0	0	0	0	0	0	0	0	0	0	0	0	0	0	0	0	0	0	0	0	0	0	0	0	0	0	n	Proteobacteria	1	Gammaproteobacteria	1			Pseudomonadales	0.98			Pseudomonadaceae	0.98	Cellvibrio	0.98
Otu690	0	0	0	0	0	0	0	0	0	0	0	0	0	0	0	0	0	0	0	0	0	0	0	0	0	0	0	0	0	0	n	Proteobacteria	1	Alphaproteobacteria	1			Rhizobiales	1			Beijerinckiaceae	0.71	Methylocapsa	0.45
Otu691	0	0	0	0	0	0	0	0	0	0	0	0	0	0	0	0	0	0	0	0	0	0	0	0	0	0	0	0	0	0	n	Bacteroidetes	0.86	Sphingobacteriia	0.48			"Sphingobacteriales"	0.48			Sphingobacteriaceae	0.26	Solitalea	0.12
Otu692	0	0	0	0	0	0	0	0	0	0	0	0	0	0	0	0	0	0	0	0	0	0	0	0	0	0	0	0	0	0	n	Proteobacteria	1	Alphaproteobacteria	1			Caulobacterales	0.75			Caulobacteraceae	0.69	Caulobacter	0.49
Otu693	0	0	0	0	0	0	0	0	0	0	0	0	0	0	0	0	0	0	0	0	0	0	0	0	0	0	0	0	0	0	n	Proteobacteria	1	Betaproteobacteria	0.99			Burkholderiales	0.97			Oxalobacteraceae	0.9	Paraherbaspirillum	0.46
Otu694	0	0	0	0	0	2	0	0	0	0	0	0	0	0	0	0	0	0	0	0	8.52842e-05	0	0	0	0	0	0	0	0	0	n	Proteobacteria	0.73	Betaproteobacteria	0.71			Burkholderiales	0.71			Oxalobacteraceae	0.69	Paraherbaspirillum	0.52
Otu695	0	0	0	0	0	0	0	0	0	0	0	0	0	0	0	0	0	0	0	0	0	0	0	0	0	0	0	0	0	0	n	Proteobacteria	0.66	Oligoflexia	0.29			Oligoflexales	0.29			Oligoflexaceae	0.29	Oligoflexus	0.29
Otu696	0	0	0	0	0	0	0	0	0	0	0	0	0	0	0	0	0	0	0	0	0	0	0	0	0	0	0	0	0	0	n	Actinobacteria	0.72	Actinobacteria	0.66	Nitriliruptoridae	0.26	Nitriliruptorales	0.26			Nitriliruptoraceae	0.26	Nitriliruptor	0.26
Otu697	0	0	0	0	0	0	0	0	0	0	0	0	0	0	0	0	0	0	0	0	0	0	0	0	0	0	0	0	0	0	n	Proteobacteria	1	Alphaproteobacteria	0.99			Rhizobiales	0.75			Hyphomicrobiaceae	0.18	Prosthecomicrobium	0.12
Otu698	0	0	0	0	0	0	0	0	0	0	0	0	0	0	0	0	0	0	0	0	0	0	0	0	0	0	0	0	0	0	n	Proteobacteria	0.87	Deltaproteobacteria	0.83			Myxococcales	0.63	Nannocystineae	0.59	"Haliangiaceae"	0.51	Haliangium	0.51
Otu699	0	0	0	0	0	0	0	0	0	0	0	0	0	0	0	0	0	0	0	0	0	0	0	0	0	0	0	0	0	0	n	Proteobacteria	0.99	Alphaproteobacteria	0.99			Rhizobiales	0.99			Beijerinckiaceae	0.78	Methylorosula	0.3
Otu70	0	0	0	0	0	16	21	33	1	0	0	0	0	0	0	0	0	0	0	0	0.000682274	0.000549709	0.00084761	2.49029e-05	0	0	0	0	0	0	n	Proteobacteria	1	Alphaproteobacteria	1			Rhizobiales	1			Phyllobacteriaceae	0.41	Hoeflea	0.27
Otu700	0	0	0	0	0	0	0	0	0	0	0	0	0	0	0	0	0	0	0	0	0	0	0	0	0	0	0	0	0	0	n	Proteobacteria	1	Alphaproteobacteria	1			Rhodospirillales	1			Acetobacteraceae	1	Paracraurococcus	0.69
Otu701	0	0	0	0	0	0	0	0	0	0	0	0	0	0	0	0	0	0	0	0	0	0	0	0	0	0	0	0	0	0	n	Proteobacteria	0.99	Alphaproteobacteria	0.96			Rhizobiales	0.92			Bradyrhizobiaceae	0.84	Tardiphaga	0.77
Otu702	0	0	0	0	0	0	0	0	0	0	0	0	0	0	0	0	0	0	0	0	0	0	0	0	0	0	0	0	0	0	n	Actinobacteria	0.72	Actinobacteria	0.72	Nitriliruptoridae	0.22	Euzebyales	0.18			Euzebyaceae	0.18	Euzebya	0.18
Otu703	0	0	0	0	0	0	0	0	0	0	0	0	0	0	0	0	0	0	0	0	0	0	0	0	0	0	0	0	0	0	n	Proteobacteria	0.83	Deltaproteobacteria	0.76			Syntrophobacterales	0.36			Syntrophobacteraceae	0.28	Desulfoglaeba	0.21
Otu704	0	0	0	0	0	0	0	0	0	0	0	0	0	0	0	0	0	0	0	0	0	0	0	0	0	0	0	0	0	0	n	Proteobacteria	1	Alphaproteobacteria	1			Rhizobiales	0.67			Xanthobacteraceae	0.19	Pseudolabrys	0.18
Otu705	0	0	0	0	0	0	0	0	0	0	0	0	0	0	0	0	0	0	0	0	0	0	0	0	0	0	0	0	0	0	n	Proteobacteria	1	Alphaproteobacteria	0.99			Sphingomonadales	0.99			Sphingomonadaceae	0.99	Sphingomonas	0.83
Otu706	0	0	0	0	0	0	0	0	0	0	0	0	0	0	0	0	0	0	0	0	0	0	0	0	0	0	0	0	0	0	n	Proteobacteria	0.99	Alphaproteobacteria	0.96			Rhodospirillales	0.57			Rhodospirillaceae	0.55	Lacibacterium	0.21
Otu707	0	0	0	0	0	0	0	0	0	0	0	0	0	0	0	0	0	0	0	0	0	0	0	0	0	0	0	0	0	0	n	Proteobacteria	0.99	Alphaproteobacteria	0.99			Sphingomonadales	0.86			Sphingomonadaceae	0.86	Sandaracinobacter	0.25
Otu708	0	0	0	0	0	0	0	0	0	0	0	0	0	0	0	0	0	0	0	0	0	0	0	0	0	0	0	0	0	0	n	Proteobacteria	1	Alphaproteobacteria	1			Rhodospirillales	0.89			Acetobacteraceae	0.88	Paracraurococcus	0.64
Otu709	1	1	530	2	218	1	0	10	0	2	2	3	0	0	2	2.84722e-05	4.22994e-05	0.0194054	5.29942e-05	0.00801824	4.26421e-05	0	0.000256852	0	4.0028e-05	2.93681e-05	7.109e-05	0	0	3.53951e-05	n	Proteobacteria	1	Betaproteobacteria	1			Burkholderiales	1			Oxalobacteraceae	1	Massilia	0.98
Otu71	0	0	0	0	0	0	11	0	0	0	0	0	0	0	0	0	0	0	0	0	0	0.000287943	0	0	0	0	0	0	0	0	n	Proteobacteria	1	Alphaproteobacteria	1			Caulobacterales	1			Caulobacteraceae	1	Caulobacter	0.57
Otu710	0	0	0	0	0	0	0	0	0	0	0	0	0	0	0	0	0	0	0	0	0	0	0	0	0	0	0	0	0	0	n	Bacteroidetes	1	Bacteroidia	1			"Bacteroidales"	1			"Prevotellaceae"	1	Prevotella	1
Otu711	0	0	0	0	0	0	0	0	0	0	0	0	0	0	0	0	0	0	0	0	0	0	0	0	0	0	0	0	0	0	n	Actinobacteria	1	Actinobacteria	1	Actinobacteridae	1	Actinomycetales	1	Corynebacterineae	1	Dietziaceae	1	Dietzia	1
Otu712	0	0	0	0	0	0	0	0	0	0	4	0	0	0	0	0	0	0	0	0	0	0	0	0	0	5.87363e-05	0	0	0	0	n	Proteobacteria	0.99	Gammaproteobacteria	0.9			Oceanospirillales	0.35			Oceanospirillaceae	0.24	Spongiispira	0.16
Otu713	0	0	0	0	0	0	0	0	0	0	0	0	0	0	0	0	0	0	0	0	0	0	0	0	0	0	0	0	0	0	n	Proteobacteria	0.65	Alphaproteobacteria	0.38			Rhizobiales	0.25			Bradyrhizobiaceae	0.11	Rhodoblastus	0.11
Otu714	0	0	0	0	0	0	0	0	0	0	0	0	0	0	0	0	0	0	0	0	0	0	0	0	0	0	0	0	0	0	n	Proteobacteria	1	Alphaproteobacteria	1			Rhodospirillales	1			Acetobacteraceae	0.84	Rubritepida	0.35
Otu715	0	0	0	0	0	0	0	0	0	0	0	0	0	0	0	0	0	0	0	0	0	0	0	0	0	0	0	0	0	0	n	Proteobacteria	1	Alphaproteobacteria	1			Rhizobiales	0.99			Hyphomicrobiaceae	0.36	Aquabacter	0.24
Otu716	0	0	0	0	0	0	0	0	0	0	2	0	1	0	0	0	0	0	0	0	0	0	0	0	0	2.93681e-05	0	1.88729e-05	0	0	n	Proteobacteria	1	Deltaproteobacteria	1			Myxococcales	1	Sorangiineae	1	Labilitrichaceae	0.99	Labilithrix	0.99
Otu717	0	0	0	0	0	0	0	0	0	0	0	0	0	0	0	0	0	0	0	0	0	0	0	0	0	0	0	0	0	0	n	Chloroflexi	0.12	Ardenticatenia	0.01			Ardenticatenales	0.01			Ardenticatenaceae	0.01	Ardenticatena	0.01
Otu718	0	0	0	0	0	0	0	0	0	0	0	0	0	0	0	0	0	0	0	0	0	0	0	0	0	0	0	0	0	0	n	Bacteroidetes	0.84	Cytophagia	0.83			Cytophagales	0.83			Flammeovirgaceae	0.61	Nafulsella	0.29
Otu719	0	0	0	0	0	0	0	0	0	0	0	0	0	0	0	0	0	0	0	0	0	0	0	0	0	0	0	0	0	0	n	Chloroflexi	0.25	Thermomicrobia	0.18			Thermomicrobiales	0.18			Thermomicrobiaceae	0.18	Thermorudis	0.13
Otu72	0	0	0	0	0	0	0	0	0	0	0	0	0	0	2	0	0	0	0	0	0	0	0	0	0	0	0	0	0	3.53951e-05	n	Proteobacteria	1	Alphaproteobacteria	1			Rhizobiales	1			Methylobacteriaceae	0.88	Psychroglaciecola	0.86
Otu720	0	0	0	0	0	0	0	0	0	0	0	0	0	0	0	0	0	0	0	0	0	0	0	0	0	0	0	0	0	0	n	Actinobacteria	0.87	Actinobacteria	0.87	Acidimicrobidae	0.59	Acidimicrobiales	0.59	"Acidimicrobineae"	0.59	Iamiaceae	0.55	Aquihabitans	0.55
Otu721	0	0	0	0	0	0	0	0	0	0	0	0	0	0	0	0	0	0	0	0	0	0	0	0	0	0	0	0	0	0	n	Actinobacteria	1	Actinobacteria	1	Actinobacteridae	1	Actinomycetales	1	Micromonosporineae	1	Micromonosporaceae	1	Dactylosporangium	1
Otu722	0	0	0	0	0	0	0	0	0	0	0	0	0	0	0	0	0	0	0	0	0	0	0	0	0	0	0	0	0	0	n	Firmicutes	1	Bacilli	1			Bacillales	1			Paenibacillaceae 1	1	Paenibacillus	0.85
Otu723	0	0	0	0	0	0	0	0	0	0	0	0	0	0	0	0	0	0	0	0	0	0	0	0	0	0	0	0	0	0	n	Bacteroidetes	1	Cytophagia	0.35			Cytophagales	0.35			Flammeovirgaceae	0.21	Aureibacter	0.13
Otu724	0	0	0	0	0	0	0	0	0	0	0	0	0	0	0	0	0	0	0	0	0	0	0	0	0	0	0	0	0	0	n	Proteobacteria	1	Alphaproteobacteria	1			Rhizobiales	1			Rhizobiaceae	1	Ensifer	1
Otu725	0	1	0	0	0	0	0	0	0	0	0	0	0	0	0	0	4.22994e-05	0	0	0	0	0	0	0	0	0	0	0	0	0	n	Proteobacteria	1	Alphaproteobacteria	1			Sphingomonadales	1			Erythrobacteraceae	0.96	Altererythrobacter	0.87
Otu726	0	0	0	0	0	0	0	0	0	0	0	0	0	0	0	0	0	0	0	0	0	0	0	0	0	0	0	0	0	0	n	Gemmatimonadetes	0.78	Gemmatimonadetes	0.78			Gemmatimonadales	0.78			Gemmatimonadaceae	0.78	Gemmatimonas	0.78
Otu727	0	0	0	0	0	0	0	0	0	0	0	0	0	0	0	0	0	0	0	0	0	0	0	0	0	0	0	0	0	0	n	Gemmatimonadetes	0.58	Gemmatimonadetes	0.58			Gemmatimonadales	0.58			Gemmatimonadaceae	0.58	Gemmatimonas	0.58
Otu728	0	0	0	0	0	0	0	0	0	0	0	0	0	0	0	0	0	0	0	0	0	0	0	0	0	0	0	0	0	0	n	Proteobacteria	0.8	Alphaproteobacteria	0.56			Caulobacterales	0.18			Hyphomonadaceae	0.15	Hellea	0.13
Otu729	0	0	0	0	0	0	0	0	0	0	0	0	0	0	0	0	0	0	0	0	0	0	0	0	0	0	0	0	0	0	n	Bacteroidetes	1	Sphingobacteriia	0.83			"Sphingobacteriales"	0.83			Chitinophagaceae	0.63	Parafilimonas	0.37
Otu73	0	1	0	2	6	49	69	589	451	304	3	1	2	2	9	0	4.22994e-05	0	5.29942e-05	0.000220686	0.00208946	0.00180619	0.0151286	0.0112312	0.00608426	4.40522e-05	2.36967e-05	3.77458e-05	3.48189e-05	0.000159278	n	Proteobacteria	1	Betaproteobacteria	1			Burkholderiales	1			Oxalobacteraceae	0.92	Herbaspirillum	0.46
Otu730	0	0	0	0	0	0	0	0	0	0	0	0	0	0	0	0	0	0	0	0	0	0	0	0	0	0	0	0	0	0	n	Bacteroidetes	0.97	Sphingobacteriia	0.58			"Sphingobacteriales"	0.58			Chitinophagaceae	0.45	Heliimonas	0.41
Otu731	0	0	0	0	0	0	0	0	0	0	0	0	0	0	0	0	0	0	0	0	0	0	0	0	0	0	0	0	0	0	n	Spirochaetes	1	Spirochaetia	1			Spirochaetales	1			Spirochaetaceae	1	Spirochaeta	1
Otu732	0	0	0	0	0	0	0	0	0	0	0	0	0	0	0	0	0	0	0	0	0	0	0	0	0	0	0	0	0	0	n	Proteobacteria	0.88	Alphaproteobacteria	0.82			Rhodobacterales	0.45			Rhodobacteraceae	0.45	Pseudovibrio	0.39
Otu733	0	0	0	0	0	0	0	0	0	0	0	0	0	0	0	0	0	0	0	0	0	0	0	0	0	0	0	0	0	0	n	Armatimonadetes	1	Armatimonadia	1			Armatimonadales	1			Armatimonadaceae	1	Armatimonas/Armatimonadetes_gp1	1
Otu734	0	0	0	0	0	0	0	0	0	0	0	0	0	0	0	0	0	0	0	0	0	0	0	0	0	0	0	0	0	0	n	Proteobacteria	1	Alphaproteobacteria	1			Rhizobiales	0.97			Xanthobacteraceae	0.62	Pseudolabrys	0.62
Otu735	0	0	0	0	0	0	0	0	0	0	0	0	0	0	0	0	0	0	0	0	0	0	0	0	0	0	0	0	0	0	n	Actinobacteria	1	Actinobacteria	1	Actinobacteridae	1	Actinomycetales	1	Micrococcineae	1	Micrococcaceae	0.98	Arthrobacter	0.87
Otu736	0	0	0	0	0	0	0	0	0	0	0	0	0	0	0	0	0	0	0	0	0	0	0	0	0	0	0	0	0	0	n	Bacteroidetes	1	Cytophagia	0.78			Cytophagales	0.78					Chryseolinea	0.54
Otu737	0	0	0	0	0	0	0	0	0	0	0	0	0	0	0	0	0	0	0	0	0	0	0	0	0	0	0	0	0	0	n	Actinobacteria	1	Actinobacteria	1	Actinobacteridae	1	Actinomycetales	1	Micromonosporineae	1	Micromonosporaceae	1	Actinoplanes	0.98
Otu738	0	0	0	0	0	0	2	0	1	0	26	1	80	7	206	0	0	0	0	0	0	5.23533e-05	0	2.49029e-05	0	0.000381786	2.36967e-05	0.00150983	0.000121866	0.0036457	n	Proteobacteria	1	Betaproteobacteria	1			Burkholderiales	0.89			Oxalobacteraceae	0.71	Telluria	0.46
Otu739	0	0	0	0	0	0	0	0	0	0	0	0	0	0	0	0	0	0	0	0	0	0	0	0	0	0	0	0	0	0	n	Proteobacteria	1	Alphaproteobacteria	1			Rhodospirillales	1			Acetobacteraceae	0.99	Paracraurococcus	0.3
Otu74	0	0	0	0	0	3	31	63	0	0	0	0	0	0	0	0	0	0	0	0	0.000127926	0.000811476	0.00161816	0	0	0	0	0	0	0	n	Bacteroidetes	1	Flavobacteriia	1			"Flavobacteriales"	1			Flavobacteriaceae	1	Flavobacterium	0.98
Otu740	0	0	0	0	0	0	0	0	0	0	0	0	0	0	0	0	0	0	0	0	0	0	0	0	0	0	0	0	0	0	n	Actinobacteria	1	Actinobacteria	1	Acidimicrobidae	0.71	Acidimicrobiales	0.71	"Acidimicrobineae"	0.71	"Acidimicrobineae"_incertae_sedis	0.46	Aciditerrimonas	0.46
Otu741	1	0	0	0	0	0	0	0	0	0	0	0	0	0	0	2.84722e-05	0	0	0	0	0	0	0	0	0	0	0	0	0	0	n	Firmicutes	0.64	Clostridia	0.31			Clostridiales	0.31			Clostridiaceae 4	0.09	Anaerosolibacter	0.06
Otu742	0	0	0	0	0	0	0	0	0	0	2	1	1	0	0	0	0	0	0	0	0	0	0	0	0	2.93681e-05	2.36967e-05	1.88729e-05	0	0	n	Actinobacteria	1	Actinobacteria	1	Actinobacteridae	1	Actinomycetales	1	Micrococcineae	1	Microbacteriaceae	1	Cryobacterium	0.99
Otu743	0	0	0	0	0	0	0	0	0	0	0	0	0	0	0	0	0	0	0	0	0	0	0	0	0	0	0	0	0	0	n	Proteobacteria	1	Alphaproteobacteria	1			Rhizobiales	1			Rhizobiales_incertae_sedis	0.93	Bauldia	0.93
Otu744	0	0	0	0	0	0	0	0	0	0	0	0	0	0	0	0	0	0	0	0	0	0	0	0	0	0	0	0	0	0	n	Bacteroidetes	1	Sphingobacteriia	0.59			"Sphingobacteriales"	0.59			Sphingobacteriaceae	0.56	Solitalea	0.52
Otu745	0	0	0	0	0	0	0	0	0	0	0	0	0	0	0	0	0	0	0	0	0	0	0	0	0	0	0	0	0	0	n	Proteobacteria	0.94	Alphaproteobacteria	0.34			Rhizobiales	0.33			Bradyrhizobiaceae	0.33	Tardiphaga	0.33
Otu746	0	0	0	0	0	0	0	0	0	0	0	0	0	0	0	0	0	0	0	0	0	0	0	0	0	0	0	0	0	0	n	Proteobacteria	0.96	Deltaproteobacteria	0.92			Myxococcales	0.71	Cystobacterineae	0.55	Cystobacteraceae	0.27	Archangium	0.11
Otu747	0	0	0	0	0	0	0	0	0	0	0	0	0	0	0	0	0	0	0	0	0	0	0	0	0	0	0	0	0	0	n	Proteobacteria	1	Gammaproteobacteria	0.99			Pseudomonadales	0.99			Pseudomonadaceae	0.99	Rhizobacter	0.99
Otu748	0	0	0	0	0	0	0	0	0	0	2	2	0	0	1	0	0	0	0	0	0	0	0	0	0	2.93681e-05	4.73934e-05	0	0	1.76975e-05	n	Proteobacteria	1	Betaproteobacteria	1			Burkholderiales	0.96			Burkholderiaceae	0.39	Burkholderia	0.37
Otu749	0	0	0	0	0	0	0	0	0	0	0	0	0	0	0	0	0	0	0	0	0	0	0	0	0	0	0	0	0	0	n	Proteobacteria	0.92	Deltaproteobacteria	0.86			Myxococcales	0.78	Nannocystineae	0.7	"Haliangiaceae"	0.43	Haliangium	0.43
Otu75	0	0	0	0	0	0	0	0	0	0	0	0	0	0	0	0	0	0	0	0	0	0	0	0	0	0	0	0	0	0	n	Proteobacteria	1	Deltaproteobacteria	1			Myxococcales	1	Cystobacterineae	1	Cystobacteraceae	0.99	Hyalangium	0.56
Otu750	0	0	0	0	0	0	0	0	0	0	0	0	0	0	0	0	0	0	0	0	0	0	0	0	0	0	0	0	0	0	n	Proteobacteria	1	Alphaproteobacteria	1			Rhizobiales	0.99			Xanthobacteraceae	0.64	Pseudolabrys	0.64
Otu751	0	0	0	0	0	0	0	0	0	0	0	0	0	0	0	0	0	0	0	0	0	0	0	0	0	0	0	0	0	0	n	Proteobacteria	0.99	Deltaproteobacteria	0.95			Myxococcales	0.91	Nannocystineae	0.76	"Haliangiaceae"	0.62	Haliangium	0.62
Otu752	0	0	0	0	0	0	0	0	0	0	0	0	0	0	0	0	0	0	0	0	0	0	0	0	0	0	0	0	0	0	n	Proteobacteria	0.59	Gammaproteobacteria	0.3			Chromatiales	0.27			Chromatiaceae	0.22	Thiobaca	0.21
Otu753	0	0	0	0	0	0	0	0	0	0	0	0	0	0	0	0	0	0	0	0	0	0	0	0	0	0	0	0	0	0	n	Acidobacteria	1	Acidobacteria_Gp3	0.95									Bryobacter	0.43
Otu754	0	0	0	0	0	0	0	0	0	0	0	0	0	0	0	0	0	0	0	0	0	0	0	0	0	0	0	0	0	0	n	Firmicutes	0.95	Bacilli	0.89			Bacillales	0.88			Paenibacillaceae 1	0.66	Fontibacillus	0.24
Otu755	0	0	0	0	0	0	0	0	0	0	0	0	0	0	0	0	0	0	0	0	0	0	0	0	0	0	0	0	0	0	n	Acidobacteria	0.42	Acidobacteria_Gp1	0.42									Candidatus Koribacter	0.32
Otu756	0	0	0	0	0	0	0	0	0	0	0	0	0	0	0	0	0	0	0	0	0	0	0	0	0	0	0	0	0	0	n	Proteobacteria	0.94	Betaproteobacteria	0.81			Neisseriales	0.4			Neisseriaceae	0.4	Alysiella	0.27
Otu757	0	0	0	0	0	0	0	0	0	0	0	0	0	0	0	0	0	0	0	0	0	0	0	0	0	0	0	0	0	0	n	Actinobacteria	1	Actinobacteria	1	Actinobacteridae	1	Actinomycetales	1	Micrococcineae	1	Micrococcaceae	1	Arthrobacter	1
Otu758	0	0	0	0	0	0	0	0	0	0	0	0	0	0	0	0	0	0	0	0	0	0	0	0	0	0	0	0	0	0	n	Actinobacteria	0.29	Actinobacteria	0.29	Actinobacteridae	0.28	Actinomycetales	0.28	Propionibacterineae	0.2	Propionibacteriaceae	0.18	Naumannella	0.12
Otu759	0	0	0	0	0	0	0	0	0	0	0	0	0	0	0	0	0	0	0	0	0	0	0	0	0	0	0	0	0	0	n	Actinobacteria	0.88	Actinobacteria	0.88	Actinobacteridae	0.76	Actinomycetales	0.74	Frankineae	0.41	Sporichthyaceae	0.3	Sporichthya	0.3
Otu76	91	90	35	111	86	19	12	33	32	9	108	67	47	39	86	0.00259097	0.00380695	0.00128149	0.00294118	0.00316316	0.0008102	0.00031412	0.00084761	0.000796892	0.000180126	0.00158588	0.00158768	0.000887027	0.000678969	0.00152199	n	Proteobacteria	0.86	Betaproteobacteria	0.65			Burkholderiales	0.62			Oxalobacteraceae	0.15	Rugamonas	0.11
Otu760	0	0	0	0	0	0	0	0	0	0	0	0	0	0	0	0	0	0	0	0	0	0	0	0	0	0	0	0	0	0	n	Acidobacteria	0.8	Acidobacteria_Gp3	0.8									Candidatus Solibacter	0.8
Otu761	0	0	0	0	0	0	0	0	0	0	0	0	0	0	0	0	0	0	0	0	0	0	0	0	0	0	0	0	0	0	n	Proteobacteria	0.58	Deltaproteobacteria	0.41			Syntrophobacterales	0.36			Syntrophobacteraceae	0.36	Desulfovirga	0.34
Otu762	0	0	0	0	0	0	0	0	0	0	0	0	0	0	0	0	0	0	0	0	0	0	0	0	0	0	0	0	0	0	n	Verrucomicrobia	0.26	Opitutae	0.26			Opitutales	0.25			Opitutaceae	0.25	Alterococcus	0.24
Otu763	0	0	0	0	0	0	0	0	0	0	0	0	0	0	0	0	0	0	0	0	0	0	0	0	0	0	0	0	0	0	n	Proteobacteria	1	Betaproteobacteria	0.99			Burkholderiales	0.92			Oxalobacteraceae	0.8	Oxalobacter	0.76
Otu764	0	0	0	0	0	0	0	0	0	0	0	0	0	0	0	0	0	0	0	0	0	0	0	0	0	0	0	0	0	0	n	Proteobacteria	1	Gammaproteobacteria	0.97			Xanthomonadales	0.97			Xanthomonadaceae	0.97	Fulvimonas	0.47
Otu765	0	0	0	0	0	0	0	0	0	0	0	0	0	0	0	0	0	0	0	0	0	0	0	0	0	0	0	0	0	0	n	Proteobacteria	1	Alphaproteobacteria	1			Rhizobiales	1			Beijerinckiaceae	0.97	Methylocella	0.51
Otu766	0	0	0	0	0	0	0	0	0	0	0	0	0	0	0	0	0	0	0	0	0	0	0	0	0	0	0	0	0	0	n	Proteobacteria	0.72	Deltaproteobacteria	0.48			Myxococcales	0.16			Sandaracinaceae	0.13	Sandaracinus	0.13
Otu767	0	0	0	0	0	0	0	0	0	0	0	0	0	0	0	0	0	0	0	0	0	0	0	0	0	0	0	0	0	0	n	Elusimicrobia	0.49	Endomicrobia	0.47									Candidatus Endomicrobium	0.47
Otu768	0	0	0	0	0	0	0	0	0	0	0	0	0	0	0	0	0	0	0	0	0	0	0	0	0	0	0	0	0	0	n	Proteobacteria	1	Alphaproteobacteria	0.99			Rhizobiales	0.68			Xanthobacteraceae	0.37	Pseudolabrys	0.37
Otu769	0	0	0	0	0	0	0	0	0	0	0	0	0	0	0	0	0	0	0	0	0	0	0	0	0	0	0	0	0	0	n	Verrucomicrobia	1	Subdivision3	1									Subdivision3_genera_incertae_sedis	1
Otu77	0	0	0	0	0	0	0	0	0	0	0	0	0	0	0	0	0	0	0	0	0	0	0	0	0	0	0	0	0	0	n	Proteobacteria	1	Betaproteobacteria	0.96			Hydrogenophilales	0.34			Hydrogenophilaceae	0.34	Thiobacillus	0.34
Otu770	0	0	0	0	0	0	0	0	0	0	0	0	0	4	0	0	0	0	0	0	0	0	0	0	0	0	0	0	6.96379e-05	0	n	Proteobacteria	1	Betaproteobacteria	0.73			Burkholderiales	0.73			Burkholderiaceae	0.48	Paucimonas	0.26
Otu771	0	0	0	0	0	0	0	0	0	0	0	0	0	0	0	0	0	0	0	0	0	0	0	0	0	0	0	0	0	0	n	Proteobacteria	0.88	Betaproteobacteria	0.81			Burkholderiales	0.76			Alcaligenaceae	0.64	Paralcaligenes	0.09
Otu772	0	0	0	0	0	0	0	0	0	0	0	0	0	0	0	0	0	0	0	0	0	0	0	0	0	0	0	0	0	0	n	Acidobacteria	1	Acidobacteria_Gp3	0.99									Gp3	0.83
Otu773	0	0	0	0	0	0	0	0	0	0	0	0	0	0	0	0	0	0	0	0	0	0	0	0	0	0	0	0	0	0	n	Acidobacteria	0.47	Acidobacteria_Gp3	0.36									Bryobacter	0.27
Otu774	0	0	0	0	0	0	0	0	0	0	0	0	0	0	0	0	0	0	0	0	0	0	0	0	0	0	0	0	0	0	n	Proteobacteria	0.96	Alphaproteobacteria	0.82			Rhodospirillales	0.4			Rhodospirillaceae	0.4	Telmatospirillum	0.28
Otu775	0	0	0	0	0	0	0	0	0	0	0	0	0	0	0	0	0	0	0	0	0	0	0	0	0	0	0	0	0	0	n	Proteobacteria	1	Alphaproteobacteria	1			Rhizobiales	0.99			Hyphomicrobiaceae	0.36	Prosthecomicrobium	0.12
Otu776	0	0	0	0	0	0	0	0	0	0	0	0	0	0	0	0	0	0	0	0	0	0	0	0	0	0	0	0	0	0	n	Chlamydiae	0.98	Chlamydiia	0.98			Chlamydiales	0.98			Parachlamydiaceae	0.92	Parachlamydia	0.71
Otu777	0	0	0	0	0	0	0	0	0	0	0	0	0	0	0	0	0	0	0	0	0	0	0	0	0	0	0	0	0	0	n	Proteobacteria	1	Deltaproteobacteria	0.98			Myxococcales	0.96	Cystobacterineae	0.96	Cystobacteraceae	0.68	Melittangium	0.51
Otu778	0	0	0	0	0	0	0	0	0	0	0	0	0	0	0	0	0	0	0	0	0	0	0	0	0	0	0	0	0	0	n	Elusimicrobia	0.18	Endomicrobia	0.18									Candidatus Endomicrobium	0.18
Otu779	0	0	0	0	0	0	0	0	0	0	0	0	0	0	0	0	0	0	0	0	0	0	0	0	0	0	0	0	0	0	n	Proteobacteria	0.85	Deltaproteobacteria	0.78			Desulfuromonadales	0.76			Geobacteraceae	0.72	Geothermobacter	0.57
Otu78	0	0	0	0	0	0	0	0	0	0	0	0	0	0	0	0	0	0	0	0	0	0	0	0	0	0	0	0	0	0	n	Acidobacteria	1	Acidobacteria_Gp2	1									Gp2	1
Otu780	0	0	0	0	0	0	0	6	0	0	0	0	0	0	0	0	0	0	0	0	0	0	0.000154111	0	0	0	0	0	0	0	n	Proteobacteria	0.99	Alphaproteobacteria	0.99			Rhodospirillales	0.92			Rhodospirillaceae	0.92	Nisaea	0.57
Otu781	0	0	0	0	0	0	0	0	0	0	0	0	0	0	0	0	0	0	0	0	0	0	0	0	0	0	0	0	0	0	n	Proteobacteria	0.99	Alphaproteobacteria	0.95			Rhodospirillales	0.93			Acetobacteraceae	0.81	Paracraurococcus	0.29
Otu782	0	0	0	0	0	0	0	0	0	0	0	0	0	0	0	0	0	0	0	0	0	0	0	0	0	0	0	0	0	0	n	Proteobacteria	1	Alphaproteobacteria	0.99			Alphaproteobacteria_incertae_sedis	0.84					Rhizomicrobium	0.84
Otu783	0	0	0	0	0	0	0	0	0	0	0	0	0	0	0	0	0	0	0	0	0	0	0	0	0	0	0	0	0	0	n	Proteobacteria	0.75	Alphaproteobacteria	0.72			Sphingomonadales	0.41			Erythrobacteraceae	0.16	Erythromicrobium	0.13
Otu784	0	0	0	0	0	0	0	0	0	0	0	0	0	0	0	0	0	0	0	0	0	0	0	0	0	0	0	0	0	0	n	Acidobacteria	0.61	Acidobacteria_Gp3	0.6									Paludibaculum	0.51
Otu785	0	0	0	0	0	0	0	0	0	0	0	0	0	0	0	0	0	0	0	0	0	0	0	0	0	0	0	0	0	0	n	Proteobacteria	0.6	Gammaproteobacteria	0.55			Xanthomonadales	0.54			Sinobacteraceae	0.54	Povalibacter	0.54
Otu786	0	0	0	0	0	0	0	0	0	0	0	0	0	0	0	0	0	0	0	0	0	0	0	0	0	0	0	0	0	0	n	Proteobacteria	1	Alphaproteobacteria	0.99			Sphingomonadales	0.95			Sphingomonadaceae	0.95	Polymorphobacter	0.26
Otu787	0	0	0	0	0	0	0	0	0	0	0	0	0	0	0	0	0	0	0	0	0	0	0	0	0	0	0	0	0	0	n	Chloroflexi	0.34	Thermomicrobia	0.15	Sphaerobacteridae	0.15	Sphaerobacterales	0.15	"Sphaerobacterineae"	0.15	Sphaerobacteraceae	0.15	Nitrolancea	0.08
Otu788	0	0	0	0	0	0	0	0	0	0	0	0	0	0	0	0	0	0	0	0	0	0	0	0	0	0	0	0	0	0	n	Proteobacteria	0.55	Alphaproteobacteria	0.55			Rhodospirillales	0.52			Acetobacteraceae	0.44	Paracraurococcus	0.28
Otu789	0	0	0	0	0	0	0	0	0	0	0	0	0	0	0	0	0	0	0	0	0	0	0	0	0	0	0	0	0	0	n	Proteobacteria	1	Alphaproteobacteria	1			Rhizobiales	0.95			Hyphomicrobiaceae	0.16	Prosthecomicrobium	0.15
Otu79	14	0	9	7	47	2	0	9	0	0	41	22	4	9	5	0.000398611	0	0.000329525	0.00018548	0.0017287	8.52842e-05	0	0.000231166	0	0	0.000602047	0.000521327	7.54916e-05	0.000156685	8.84877e-05	n	Proteobacteria	1	Alphaproteobacteria	1			Rhizobiales	1			Bradyrhizobiaceae	1	Afipia	0.59
Otu790	0	0	0	0	0	0	0	0	0	0	0	0	0	0	0	0	0	0	0	0	0	0	0	0	0	0	0	0	0	0	n	Nitrospirae	0.68	Nitrospira	0.68			"Nitrospirales"	0.68			"Nitrospiraceae"	0.68	Nitrospira	0.68
Otu791	0	0	0	0	0	0	0	0	0	0	0	0	0	0	0	0	0	0	0	0	0	0	0	0	0	0	0	0	0	0	n	Bacteroidetes	1	Cytophagia	1			Cytophagales	1					Ohtaekwangia	0.71
Otu792	0	0	0	0	0	0	0	0	0	0	0	0	0	0	0	0	0	0	0	0	0	0	0	0	0	0	0	0	0	0	n	Acidobacteria	1	Acidobacteria_Gp3	1									Candidatus Solibacter	0.54
Otu793	0	0	0	0	0	0	0	0	0	0	0	0	0	0	0	0	0	0	0	0	0	0	0	0	0	0	0	0	0	0	n	Proteobacteria	0.99	Alphaproteobacteria	0.99			Rhodospirillales	0.8			Acetobacteraceae	0.32	Stella	0.29
Otu794	0	0	0	0	0	0	0	0	0	0	0	0	0	0	0	0	0	0	0	0	0	0	0	0	0	0	0	0	0	0	n	Verrucomicrobia	1	Subdivision3	1									Subdivision3_genera_incertae_sedis	1
Otu795	0	0	0	0	0	0	0	0	0	0	0	0	0	0	0	0	0	0	0	0	0	0	0	0	0	0	0	0	0	0	n	Proteobacteria	0.99	Alphaproteobacteria	0.99			Sneathiellales	0.49			Sneathiellaceae	0.49	Taonella	0.36
Otu796	0	0	0	0	0	0	0	0	3	0	0	0	0	0	0	0	0	0	0	0	0	0	0	7.47086e-05	0	0	0	0	0	0	n	Proteobacteria	0.97	Gammaproteobacteria	0.35			Xanthomonadales	0.35			Xanthomonadaceae	0.35	Rudaea	0.26
Otu797	0	0	0	0	0	0	0	0	0	0	0	0	0	0	0	0	0	0	0	0	0	0	0	0	0	0	0	0	0	0	n	Proteobacteria	0.75	Alphaproteobacteria	0.52			Caulobacterales	0.36			Caulobacteraceae	0.36	Phenylobacterium	0.36
Otu798	0	0	0	0	0	0	0	0	0	0	0	0	0	0	0	0	0	0	0	0	0	0	0	0	0	0	0	0	0	0	n	Firmicutes	1	Bacilli	1			Bacillales	1			Paenibacillaceae 1	0.99	Cohnella	0.99
Otu799	0	0	0	0	0	0	0	0	0	0	0	0	0	0	0	0	0	0	0	0	0	0	0	0	0	0	0	0	0	0	n	Proteobacteria	0.88	Alphaproteobacteria	0.84			Rhizobiales	0.84			Bradyrhizobiaceae	0.83	Tardiphaga	0.82
Otu80	6	0	0	0	0	0	6	0	0	0	0	0	0	0	0	0.000170833	0	0	0	0	0	0.00015706	0	0	0	0	0	0	0	0	n	Proteobacteria	1	Alphaproteobacteria	1			Rhizobiales	0.97			Hyphomicrobiaceae	0.91	Pelagibacterium	0.56
Otu800	0	0	0	0	0	0	0	0	0	0	0	0	0	0	0	0	0	0	0	0	0	0	0	0	0	0	0	0	0	0	n	Acidobacteria	0.13	Holophagae	0.09			Holophagales	0.09			Holophagaceae	0.09	Geothrix	0.02
Otu801	0	0	0	0	0	0	0	0	0	0	0	0	0	0	0	0	0	0	0	0	0	0	0	0	0	0	0	0	0	0	n	Firmicutes	1	Clostridia	1			Clostridiales	1			Peptostreptococcaceae	1	Romboutsia	0.75
Otu802	0	0	0	0	0	0	0	0	0	0	0	0	0	0	0	0	0	0	0	0	0	0	0	0	0	0	0	0	0	0	n	Proteobacteria	1	Betaproteobacteria	0.85			Burkholderiales	0.43			Alcaligenaceae	0.2	Brackiella	0.08
Otu803	0	0	0	0	0	0	0	0	0	0	0	0	0	0	0	0	0	0	0	0	0	0	0	0	0	0	0	0	0	0	n	Actinobacteria	0.75	Actinobacteria	0.75	Rubrobacteridae	0.46	Gaiellales	0.44			Gaiellaceae	0.44	Gaiella	0.44
Otu804	0	0	0	0	0	0	0	0	0	0	0	0	0	0	0	0	0	0	0	0	0	0	0	0	0	0	0	0	0	0	n	Firmicutes	0.78	Clostridia	0.74			Clostridiales	0.68			Clostridiales_Incertae Sedis IV	0.25	Mahella	0.25
Otu805	0	0	0	0	0	0	0	0	0	0	0	0	0	0	0	0	0	0	0	0	0	0	0	0	0	0	0	0	0	0	n	Proteobacteria	1	Deltaproteobacteria	1			Bdellovibrionales	1			Bacteriovoracaceae	1	Peredibacter	1
Otu806	0	0	0	0	0	0	0	0	0	0	0	0	0	0	0	0	0	0	0	0	0	0	0	0	0	0	0	0	0	0	n	Proteobacteria	1	Betaproteobacteria	1			Burkholderiales	0.66			Alcaligenaceae	0.31	Azohydromonas	0.29
Otu807	0	0	0	0	0	0	0	0	0	0	0	0	0	0	0	0	0	0	0	0	0	0	0	0	0	0	0	0	0	0	n	Planctomycetes	0.76	Phycisphaerae	0.66			Phycisphaerales	0.52			Phycisphaeraceae	0.52	Phycisphaera	0.52
Otu808	0	0	0	0	0	0	0	0	0	0	0	0	0	0	0	0	0	0	0	0	0	0	0	0	0	0	0	0	0	0	n	Proteobacteria	0.99	Alphaproteobacteria	0.97			Caulobacterales	0.89			Caulobacteraceae	0.89	Caulobacter	0.4
Otu809	0	0	0	0	0	0	0	0	2	1	0	0	0	0	0	0	0	0	0	0	0	0	0	4.98058e-05	2.0014e-05	0	0	0	0	0	n	Proteobacteria	1	Betaproteobacteria	1			Burkholderiales	1			Comamonadaceae	0.79	Pelomonas	0.49
Otu81	0	0	0	0	0	0	0	0	0	0	0	0	0	0	0	0	0	0	0	0	0	0	0	0	0	0	0	0	0	0	n	Proteobacteria	1	Gammaproteobacteria	1			Xanthomonadales	1			Xanthomonadaceae	1	Arenimonas	0.4
Otu810	0	0	0	0	0	0	0	0	0	0	0	0	0	0	0	0	0	0	0	0	0	0	0	0	0	0	0	0	0	0	n	Chloroflexi	0.59	Ktedonobacteria	0.32			Ktedonobacterales	0.32			Thermosporotrichaceae	0.25	Thermosporothrix	0.25
Otu811	0	0	0	0	0	0	0	0	0	0	0	0	0	0	0	0	0	0	0	0	0	0	0	0	0	0	0	0	0	0	n	Firmicutes	0.31	Clostridia	0.26			Thermoanaerobacterales	0.24			Thermoanaerobacteraceae	0.24	Syntrophaceticus	0.24
Otu812	0	0	0	0	0	0	0	0	0	0	0	0	0	0	0	0	0	0	0	0	0	0	0	0	0	0	0	0	0	0	n	Proteobacteria	0.95	Alphaproteobacteria	0.92			Rhizobiales	0.92			Hyphomicrobiaceae	0.62	Aquabacter	0.35
Otu813	0	0	0	0	0	0	0	0	0	0	0	0	0	0	0	0	0	0	0	0	0	0	0	0	0	0	0	0	0	0	n	Proteobacteria	0.5	Deltaproteobacteria	0.33			Bdellovibrionales	0.12			Bacteriovoracaceae	0.12	Bacteriovorax	0.12
Otu814	0	0	0	0	0	0	0	0	0	0	0	0	0	0	0	0	0	0	0	0	0	0	0	0	0	0	0	0	0	0	n	Proteobacteria	0.75	Alphaproteobacteria	0.43			Rhizobiales	0.09			Methylocystaceae	0.08	Terasakiella	0.08
Otu815	0	0	0	0	0	0	0	0	0	0	0	0	0	0	0	0	0	0	0	0	0	0	0	0	0	0	0	0	0	0	n	Proteobacteria	0.89	Alphaproteobacteria	0.86			Rhizobiales	0.54			Rhodobiaceae	0.04	Lutibaculum	0.04
Otu816	0	0	0	0	0	0	0	0	0	0	0	0	0	0	0	0	0	0	0	0	0	0	0	0	0	0	0	0	0	0	n	Proteobacteria	0.9	Alphaproteobacteria	0.87			Alphaproteobacteria_incertae_sedis	0.49					Rhizomicrobium	0.49
Otu817	0	0	0	0	0	0	0	0	0	0	0	0	0	0	0	0	0	0	0	0	0	0	0	0	0	0	0	0	0	0	n	Proteobacteria	1	Alphaproteobacteria	1			Rhodospirillales	1					Reyranella	1
Otu818	0	0	0	0	0	0	0	0	0	0	0	0	0	0	0	0	0	0	0	0	0	0	0	0	0	0	0	0	0	0	n	Actinobacteria	1	Actinobacteria	1	Rubrobacteridae	0.99	Gaiellales	0.99			Gaiellaceae	0.99	Gaiella	0.99
Otu819	0	0	0	0	0	0	0	0	0	0	0	0	0	0	0	0	0	0	0	0	0	0	0	0	0	0	0	0	0	0	n	Proteobacteria	0.98	Betaproteobacteria	0.96			Rhodocyclales	0.35			Rhodocyclaceae	0.35	Uliginosibacterium	0.11
Otu82	0	6	0	2	2	1	30	21	0	1	0	0	0	0	0	0	0.000253796	0	5.29942e-05	7.35619e-05	4.26421e-05	0.000785299	0.000539388	0	2.0014e-05	0	0	0	0	0	n	Proteobacteria	1	Alphaproteobacteria	1			Rhizobiales	1			Hyphomicrobiaceae	0.91	Devosia	0.9
Otu820	0	0	0	0	0	0	0	0	0	0	0	0	0	0	0	0	0	0	0	0	0	0	0	0	0	0	0	0	0	0	n	Bacteroidetes	0.98	Sphingobacteriia	0.84			"Sphingobacteriales"	0.84			Chitinophagaceae	0.69	Parafilimonas	0.18
Otu821	0	0	0	0	0	0	0	0	0	0	0	0	0	0	0	0	0	0	0	0	0	0	0	0	0	0	0	0	0	0	n	Acidobacteria	0.32	Acidobacteria_Gp23	0.3									Thermoanaerobaculum	0.3
Otu822	0	0	0	0	0	0	0	0	0	0	0	0	0	0	0	0	0	0	0	0	0	0	0	0	0	0	0	0	0	0	n	Acidobacteria	0.52	Acidobacteria_Gp1	0.52									Candidatus Koribacter	0.51
Otu823	0	0	0	0	0	0	0	0	0	0	0	0	0	0	0	0	0	0	0	0	0	0	0	0	0	0	0	0	0	0	n	Acidobacteria	0.97	Acidobacteria_Gp1	0.96									Edaphobacter	0.24
Otu824	0	0	0	0	0	0	0	0	0	0	0	0	0	0	0	0	0	0	0	0	0	0	0	0	0	0	0	0	0	0	n	Planctomycetes	0.67	Planctomycetia	0.61			Planctomycetales	0.56			Planctomycetaceae	0.56	Thermogutta	0.28
Otu825	0	0	0	0	0	0	0	0	0	0	0	0	0	0	0	0	0	0	0	0	0	0	0	0	0	0	0	0	0	0	n	Actinobacteria	1	Actinobacteria	1	Actinobacteridae	1	Actinomycetales	1	Micrococcineae	1	Intrasporangiaceae	1	Oryzihumus	1
Otu826	0	0	0	0	0	0	0	0	0	0	0	0	0	0	0	0	0	0	0	0	0	0	0	0	0	0	0	0	0	0	n	Bacteroidetes	1	Sphingobacteriia	1			"Sphingobacteriales"	1			Chitinophagaceae	1	Ferruginibacter	0.93
Otu827	0	0	0	0	0	0	0	0	0	0	0	0	0	0	0	0	0	0	0	0	0	0	0	0	0	0	0	0	0	0	n	Acidobacteria	0.95	Acidobacteria_Gp1	0.94									Telmatobacter	0.72
Otu828	0	0	0	0	0	0	0	0	0	0	0	0	0	0	0	0	0	0	0	0	0	0	0	0	0	0	0	0	0	0	n	Proteobacteria	0.91	Alphaproteobacteria	0.59			Rhizobiales	0.59			Bradyrhizobiaceae	0.59	Tardiphaga	0.58
Otu829	0	0	0	0	0	0	0	0	0	0	0	0	0	0	0	0	0	0	0	0	0	0	0	0	0	0	0	0	0	0	n	Actinobacteria	1	Actinobacteria	1	Acidimicrobidae	0.79	Acidimicrobiales	0.79	"Acidimicrobineae"	0.79	"Acidimicrobineae"_incertae_sedis	0.56	Aciditerrimonas	0.56
Otu83	0	2	71	29	3	0	0	0	0	0	0	0	0	0	0	0	8.45988e-05	0.00259959	0.000768415	0.000110343	0	0	0	0	0	0	0	0	0	0	n	Proteobacteria	1	Alphaproteobacteria	1			Rhizobiales	0.96			Phyllobacteriaceae	0.29	Phyllobacterium	0.18
Otu830	0	0	0	0	0	0	0	0	0	0	0	0	0	0	0	0	0	0	0	0	0	0	0	0	0	0	0	0	0	0	n	Acidobacteria	1	Acidobacteria_Gp13	0.9									Gp13	0.9
Otu831	0	0	0	0	0	0	0	0	0	0	0	0	0	0	0	0	0	0	0	0	0	0	0	0	0	0	0	0	0	0	n	Acidobacteria	0.77	Acidobacteria_Gp1	0.43									Telmatobacter	0.17
Otu832	0	0	0	0	0	0	0	0	0	0	0	0	0	0	0	0	0	0	0	0	0	0	0	0	0	0	0	0	0	0	n	Acidobacteria	1	Acidobacteria_Gp3	1									Candidatus Solibacter	0.98
Otu833	0	0	0	0	0	0	0	0	0	0	0	0	0	0	0	0	0	0	0	0	0	0	0	0	0	0	0	0	0	0	n	Proteobacteria	0.75	Alphaproteobacteria	0.6			Rhizobiales	0.6			Bradyrhizobiaceae	0.49	Tardiphaga	0.48
Otu834	0	0	0	0	0	0	0	0	0	0	0	0	0	0	0	0	0	0	0	0	0	0	0	0	0	0	0	0	0	0	n	Acidobacteria	1	Acidobacteria_Gp3	1									Bryobacter	0.76
Otu835	0	0	0	0	0	0	0	0	0	0	0	0	0	0	0	0	0	0	0	0	0	0	0	0	0	0	0	0	0	0	n	Proteobacteria	0.78	Alphaproteobacteria	0.72			Rhodospirillales	0.7			Acetobacteraceae	0.63	Rhodovarius	0.21
Otu836	0	0	0	0	0	0	0	0	0	0	0	0	0	0	0	0	0	0	0	0	0	0	0	0	0	0	0	0	0	0	n	Proteobacteria	0.98	Alphaproteobacteria	0.93			Rhizobiales	0.9			Beijerinckiaceae	0.52	Methyloferula	0.19
Otu837	0	0	0	0	0	0	0	0	0	0	0	0	0	0	0	0	0	0	0	0	0	0	0	0	0	0	0	0	0	0	n	Proteobacteria	0.94	Alphaproteobacteria	0.91			Rhizobiales	0.9			Xanthobacteraceae	0.61	Pseudolabrys	0.61
Otu838	0	0	0	0	0	2	6	104	103	0	0	1	0	0	0	0	0	0	0	0	8.52842e-05	0.00015706	0.00267126	0.002565	0	0	2.36967e-05	0	0	0	n	Proteobacteria	1	Betaproteobacteria	1			Burkholderiales	1			Oxalobacteraceae	1	Janthinobacterium	0.36
Otu839	0	0	0	1	1	16	13	115	31	118	0	6	2	3	0	0	0	0	2.64971e-05	3.67809e-05	0.000682274	0.000340296	0.00295379	0.000771989	0.00236165	0	0.00014218	3.77458e-05	5.22284e-05	0	n	Proteobacteria	1	Betaproteobacteria	1			Burkholderiales	1			Oxalobacteraceae	1	Herbaspirillum	0.99
Otu84	0	0	0	0	0	0	0	0	1	0	1	0	0	0	0	0	0	0	0	0	0	0	0	2.49029e-05	0	1.46841e-05	0	0	0	0	n	Proteobacteria	1	Alphaproteobacteria	1			Rhodospirillales	1			Acetobacteraceae	0.99	Gluconacetobacter	0.29
Otu840	0	0	0	0	0	0	0	0	0	0	0	0	0	0	0	0	0	0	0	0	0	0	0	0	0	0	0	0	0	0	n	Proteobacteria	1	Betaproteobacteria	1			Burkholderiales	0.98			Oxalobacteraceae	0.98	Massilia	0.82
Otu841	0	0	0	0	0	0	0	0	1	2	0	0	0	0	1	0	0	0	0	0	0	0	0	2.49029e-05	4.0028e-05	0	0	0	0	1.76975e-05	n	Proteobacteria	1	Betaproteobacteria	1			Burkholderiales	1			Burkholderiaceae	0.96	Ralstonia	0.38
Otu842	2	0	0	0	0	0	0	0	0	0	0	0	0	0	0	5.69444e-05	0	0	0	0	0	0	0	0	0	0	0	0	0	0	n	Proteobacteria	1	Betaproteobacteria	1			Burkholderiales	1			Alcaligenaceae	1	Bordetella	0.37
Otu843	0	0	0	0	0	0	0	0	0	0	0	0	0	0	0	0	0	0	0	0	0	0	0	0	0	0	0	0	0	0	n	Proteobacteria	1	Alphaproteobacteria	0.98			Rhizobiales	0.96			Rhodobiaceae	0.7	Methyloceanibacter	0.34
Otu844	0	0	0	0	0	0	0	0	0	0	0	0	0	0	0	0	0	0	0	0	0	0	0	0	0	0	0	0	0	0	n	Proteobacteria	1	Alphaproteobacteria	1			Rhizobiales	1			Bradyrhizobiaceae	0.54	Tardiphaga	0.36
Otu845	0	0	0	0	0	0	0	0	0	0	0	0	0	0	0	0	0	0	0	0	0	0	0	0	0	0	0	0	0	0	n	Acidobacteria	1	Acidobacteria_Gp3	1									Candidatus Solibacter	0.97
Otu846	0	0	0	0	0	0	0	0	0	0	0	0	0	0	0	0	0	0	0	0	0	0	0	0	0	0	0	0	0	0	n	Proteobacteria	1	Alphaproteobacteria	1			Rhizobiales	0.81			Beijerinckiaceae	0.55	Methylovirgula	0.54
Otu847	0	0	0	0	0	0	0	0	0	0	0	0	0	0	0	0	0	0	0	0	0	0	0	0	0	0	0	0	0	0	n	Proteobacteria	0.97	Alphaproteobacteria	0.97			Rhizobiales	0.97			Bradyrhizobiaceae	0.97	Oligotropha	0.94
Otu848	0	0	0	0	0	0	0	0	0	0	0	0	0	0	0	0	0	0	0	0	0	0	0	0	0	0	0	0	0	0	n	Proteobacteria	1	Alphaproteobacteria	1			Rhodospirillales	1			Acetobacteraceae	1	Granulibacter	0.78
Otu849	0	0	0	0	0	0	0	0	0	0	0	0	0	0	0	0	0	0	0	0	0	0	0	0	0	0	0	0	0	0	n	Proteobacteria	0.75	Deltaproteobacteria	0.5			Myxococcales	0.29	Sorangiineae	0.29	Phaselicystidaceae	0.14	Phaselicystis	0.14
Otu85	0	0	0	0	0	0	0	0	0	0	0	0	0	0	0	0	0	0	0	0	0	0	0	0	0	0	0	0	0	0	n	Proteobacteria	1	Betaproteobacteria	0.96			Burkholderiales	0.39			Alcaligenaceae	0.37	Eoetvoesia	0.15
Otu850	0	0	0	0	0	0	0	0	0	0	0	0	0	0	0	0	0	0	0	0	0	0	0	0	0	0	0	0	0	0	n	Proteobacteria	0.91	Gammaproteobacteria	0.81			Xanthomonadales	0.74			Xanthomonadaceae	0.7	Rehaibacterium	0.12
Otu851	0	0	0	0	0	0	0	0	0	0	0	0	0	0	0	0	0	0	0	0	0	0	0	0	0	0	0	0	0	0	n	Proteobacteria	0.77	Betaproteobacteria	0.77			Burkholderiales	0.63			Burkholderiaceae	0.41	Paucimonas	0.41
Otu852	0	0	0	0	0	0	0	0	0	0	0	0	0	0	0	0	0	0	0	0	0	0	0	0	0	0	0	0	0	0	n	Proteobacteria	0.97	Alphaproteobacteria	0.88			Sphingomonadales	0.75			Sphingomonadaceae	0.71	Sandaracinobacter	0.5
Otu853	0	0	0	0	0	0	0	0	0	0	0	0	0	0	0	0	0	0	0	0	0	0	0	0	0	0	0	0	0	0	n	Verrucomicrobia	1	Subdivision3	1									Subdivision3_genera_incertae_sedis	1
Otu854	0	0	0	0	0	0	0	0	0	0	0	0	0	0	0	0	0	0	0	0	0	0	0	0	0	0	0	0	0	0	n	Proteobacteria	0.88	Oligoflexia	0.36			Oligoflexales	0.36			Oligoflexaceae	0.36	Oligoflexus	0.36
Otu855	0	0	0	0	0	0	0	0	0	0	0	0	0	0	0	0	0	0	0	0	0	0	0	0	0	0	0	0	0	0	n	Proteobacteria	0.9	Gammaproteobacteria	0.78			Alteromonadales	0.24			Alteromonadales_incertae_sedis	0.16	Psychrobium	0.16
Otu856	0	0	0	0	0	0	0	0	0	0	0	0	0	0	0	0	0	0	0	0	0	0	0	0	0	0	0	0	0	0	n	Verrucomicrobia	0.42	Subdivision3	0.34									Subdivision3_genera_incertae_sedis	0.34
Otu857	0	0	0	0	0	0	0	0	0	0	0	0	0	0	0	0	0	0	0	0	0	0	0	0	0	0	0	0	0	0	n	Acidobacteria	1	Acidobacteria_Gp10	1									Gp10	1
Otu858	0	0	0	0	0	0	0	0	0	0	0	0	0	0	0	0	0	0	0	0	0	0	0	0	0	0	0	0	0	0	n	Proteobacteria	1	Alphaproteobacteria	0.97			Rhodospirillales	0.68			Rhodospirillaceae	0.61	Constrictibacter	0.33
Otu859	0	0	0	0	0	0	0	0	0	0	0	0	0	0	0	0	0	0	0	0	0	0	0	0	0	0	0	0	0	0	n	Acidobacteria	0.74	Acidobacteria_Gp3	0.13									Bryobacter	0.13
Otu86	0	0	0	0	0	0	0	0	0	0	0	0	0	0	0	0	0	0	0	0	0	0	0	0	0	0	0	0	0	0	n	Proteobacteria	1	Gammaproteobacteria	1			Xanthomonadales	0.98			Xanthomonadaceae	0.98	Dokdonella	0.31
Otu860	0	0	0	0	0	0	0	0	0	0	0	0	0	0	0	0	0	0	0	0	0	0	0	0	0	0	0	0	0	0	n	Acidobacteria	0.9	Acidobacteria_Gp1	0.89									Telmatobacter	0.69
Otu861	0	0	0	0	0	0	0	0	0	0	0	0	0	0	0	0	0	0	0	0	0	0	0	0	0	0	0	0	0	0	n	Acidobacteria	0.58	Acidobacteria_Gp3	0.58									Candidatus Solibacter	0.58
Otu862	0	0	0	0	0	0	0	0	0	0	0	0	0	0	0	0	0	0	0	0	0	0	0	0	0	0	0	0	0	0	n	Proteobacteria	1	Alphaproteobacteria	1			Rhodobacterales	1			Rhodobacteraceae	1	Rubellimicrobium	0.6
Otu863	0	0	0	0	0	0	0	0	0	0	0	0	0	0	0	0	0	0	0	0	0	0	0	0	0	0	0	0	0	0	n	Firmicutes	0.45	Clostridia	0.25			Clostridiales	0.18			Clostridiales_Incertae Sedis XII	0.16	Guggenheimella	0.16
Otu864	0	0	0	0	0	0	2	0	0	0	0	0	0	0	0	0	0	0	0	0	0	5.23533e-05	0	0	0	0	0	0	0	0	n	Proteobacteria	1	Gammaproteobacteria	0.99			Xanthomonadales	0.98			Xanthomonadaceae	0.98	Frateuria	0.46
Otu865	0	0	0	0	0	0	0	0	0	0	0	0	0	0	0	0	0	0	0	0	0	0	0	0	0	0	0	0	0	0	n	Proteobacteria	1	Alphaproteobacteria	1			Alphaproteobacteria_incertae_sedis	0.99					Rhizomicrobium	0.99
Otu866	0	0	0	0	0	0	0	0	0	0	0	0	0	0	0	0	0	0	0	0	0	0	0	0	0	0	0	0	0	0	n	Proteobacteria	0.98	Betaproteobacteria	0.93			Burkholderiales	0.46			Burkholderiales_incertae_sedis	0.13	Thiobacter	0.1
Otu867	0	0	0	0	0	0	0	0	0	0	0	0	0	0	0	0	0	0	0	0	0	0	0	0	0	0	0	0	0	0	n	Proteobacteria	0.96	Deltaproteobacteria	0.37			Desulfobacterales	0.28			Desulfobacteraceae	0.28	Desulfoconvexum	0.13
Otu868	0	0	0	0	0	0	0	0	0	0	0	0	0	0	0	0	0	0	0	0	0	0	0	0	0	0	0	0	0	0	n	Proteobacteria	0.98	Alphaproteobacteria	0.82			Alphaproteobacteria_incertae_sedis	0.64					Rhizomicrobium	0.64
Otu869	0	0	0	0	0	0	0	0	0	0	0	0	0	0	0	0	0	0	0	0	0	0	0	0	0	0	0	0	0	0	n	Proteobacteria	1	Alphaproteobacteria	1			Rhizobiales	0.91			Hyphomicrobiaceae	0.57	Cucumibacter	0.4
Otu87	0	0	0	0	0	0	44	3	0	5	0	0	0	0	0	0	0	0	0	0	0	0.00115177	7.70555e-05	0	0.00010007	0	0	0	0	0	n	Bacteroidetes	1	Flavobacteriia	1			"Flavobacteriales"	1			Flavobacteriaceae	1	Chryseobacterium	1
Otu870	0	0	0	0	0	0	0	0	0	0	0	0	0	0	0	0	0	0	0	0	0	0	0	0	0	0	0	0	0	0	n	Proteobacteria	1	Betaproteobacteria	0.87			Burkholderiales	0.78			Burkholderiaceae	0.57	Limnobacter	0.31
Otu871	0	0	0	0	0	0	0	0	0	0	0	0	0	0	0	0	0	0	0	0	0	0	0	0	0	0	0	0	0	0	n	Bacteroidetes	0.97	Flavobacteriia	0.97			"Flavobacteriales"	0.97			Flavobacteriaceae	0.95	Subsaxibacter	0.35
Otu872	0	0	0	0	0	0	0	0	0	0	0	0	0	0	0	0	0	0	0	0	0	0	0	0	0	0	0	0	0	0	n	Proteobacteria	0.84	Betaproteobacteria	0.43			Burkholderiales	0.38			Burkholderiaceae	0.12	Paucimonas	0.1
Otu873	0	0	0	0	0	0	0	0	0	0	0	0	0	0	0	0	0	0	0	0	0	0	0	0	0	0	0	0	0	0	n	Proteobacteria	0.56	Deltaproteobacteria	0.39			Syntrophobacterales	0.18			Syntrophobacteraceae	0.18	Desulfovirga	0.15
Otu874	0	0	0	0	0	0	0	0	0	0	0	0	0	0	0	0	0	0	0	0	0	0	0	0	0	0	0	0	0	0	n	Proteobacteria	0.57	Deltaproteobacteria	0.38			Bdellovibrionales	0.28			Bdellovibrionaceae	0.28	Bdellovibrio	0.28
Otu875	0	0	0	0	0	0	0	0	0	0	0	0	0	0	0	0	0	0	0	0	0	0	0	0	0	0	0	0	0	0	n	Bacteroidetes	0.99	Sphingobacteriia	0.88			"Sphingobacteriales"	0.88			Sphingobacteriaceae	0.87	Solitalea	0.62
Otu876	0	0	0	0	0	0	0	0	0	0	0	0	0	0	0	0	0	0	0	0	0	0	0	0	0	0	0	0	0	0	n	Bacteroidetes	0.64	Flavobacteriia	0.64			"Flavobacteriales"	0.64			Flavobacteriaceae	0.64	Subsaxibacter	0.49
Otu877	0	0	0	0	0	0	0	0	0	0	0	0	0	0	0	0	0	0	0	0	0	0	0	0	0	0	0	0	0	0	n	Proteobacteria	0.89	Betaproteobacteria	0.51			Rhodocyclales	0.3			Rhodocyclaceae	0.3	Georgfuchsia	0.06
Otu878	0	0	0	0	0	0	0	0	0	0	0	0	0	0	0	0	0	0	0	0	0	0	0	0	0	0	0	0	0	0	n	Chloroflexi	0.51	Anaerolineae	0.26			Anaerolineales	0.26			Anaerolineaceae	0.26	Thermomarinilinea	0.26
Otu879	0	0	0	0	0	0	0	0	0	0	0	0	0	0	0	0	0	0	0	0	0	0	0	0	0	0	0	0	0	0	n	Bacteroidetes	0.98	Flavobacteriia	0.98			"Flavobacteriales"	0.98			Flavobacteriaceae	0.98	Olleya	0.08
Otu88	0	0	0	0	0	0	0	0	0	0	0	0	0	0	0	0	0	0	0	0	0	0	0	0	0	0	0	0	0	0	n	Proteobacteria	1	Betaproteobacteria	1									Chitinivorax	0.33
Otu880	0	0	0	0	0	0	0	0	0	0	0	0	0	0	0	0	0	0	0	0	0	0	0	0	0	0	0	0	0	0	n	Proteobacteria	0.84	Alphaproteobacteria	0.77			Rhizobiales	0.76			Xanthobacteraceae	0.48	Pseudolabrys	0.48
Otu881	0	0	0	0	0	0	0	0	0	0	0	0	0	0	0	0	0	0	0	0	0	0	0	0	0	0	0	0	0	0	n	Proteobacteria	0.85	Alphaproteobacteria	0.47			Rhizobiales	0.46			Xanthobacteraceae	0.43	Pseudolabrys	0.43
Otu882	0	0	0	0	0	0	0	0	0	0	0	0	0	0	0	0	0	0	0	0	0	0	0	0	0	0	0	0	0	0	n	Actinobacteria	0.99	Actinobacteria	0.99	Actinobacteridae	0.99	Actinomycetales	0.99	Micrococcineae	0.75	Intrasporangiaceae	0.41	Arsenicicoccus	0.18
Otu883	0	0	0	0	0	0	0	0	0	0	0	0	0	0	0	0	0	0	0	0	0	0	0	0	0	0	0	0	0	0	n	Proteobacteria	0.67	Deltaproteobacteria	0.61			Desulfuromonadales	0.24			Geobacteraceae	0.24	Geopsychrobacter	0.2
Otu884	0	0	0	0	0	0	0	0	0	0	0	0	0	0	0	0	0	0	0	0	0	0	0	0	0	0	0	0	0	0	n	Acidobacteria	0.37	Acidobacteria_Gp1	0.15									Bryocella	0.08
Otu885	0	0	0	0	0	0	0	0	0	0	0	0	0	0	0	0	0	0	0	0	0	0	0	0	0	0	0	0	0	0	n	Proteobacteria	0.91	Gammaproteobacteria	0.65			Gammaproteobacteria_incertae_sedis	0.17					Pleionea	0.04
Otu886	0	0	0	0	0	0	0	0	0	0	0	0	0	0	0	0	0	0	0	0	0	0	0	0	0	0	0	0	0	0	n	Proteobacteria	0.94	Gammaproteobacteria	0.63			Xanthomonadales	0.42			Sinobacteraceae	0.41	Panacagrimonas	0.39
Otu887	0	0	0	0	0	0	0	0	0	0	0	0	0	0	0	0	0	0	0	0	0	0	0	0	0	0	0	0	0	0	n	Chlamydiae	0.96	Chlamydiia	0.96			Chlamydiales	0.96			Waddliaceae	0.57	Waddlia	0.57
Otu888	0	0	0	0	0	0	0	0	0	0	0	0	0	0	0	0	0	0	0	0	0	0	0	0	0	0	0	0	0	0	n	Proteobacteria	0.92	Deltaproteobacteria	0.87			Bdellovibrionales	0.78			Bdellovibrionaceae	0.7	Bdellovibrio	0.7
Otu889	0	0	0	0	0	0	0	0	0	0	0	0	0	0	0	0	0	0	0	0	0	0	0	0	0	0	0	0	0	0	n	Proteobacteria	0.75	Gammaproteobacteria	0.17			Chromatiales	0.11			Ectothiorhodospiraceae	0.11	Acidiferrobacter	0.11
Otu89	0	0	0	0	0	1	1	5	0	0	28	25	3	64	4	0	0	0	0	0	4.26421e-05	2.61766e-05	0.000128426	0	0	0.000411154	0.000592417	5.66187e-05	0.00111421	7.07902e-05	n	Proteobacteria	1	Alphaproteobacteria	0.97			Sphingomonadales	0.97			Sphingomonadaceae	0.95	Sphingomonas	0.87
Otu890	0	0	0	0	0	0	0	0	0	0	0	0	0	0	0	0	0	0	0	0	0	0	0	0	0	0	0	0	0	0	n	Proteobacteria	1	Gammaproteobacteria	0.82			Alteromonadales	0.67			Alteromonadales_incertae_sedis	0.67	Pseudoteredinibacter	0.6
Otu891	0	0	0	0	0	0	0	0	0	0	0	0	0	0	0	0	0	0	0	0	0	0	0	0	0	0	0	0	0	0	n	Proteobacteria	0.98	Alphaproteobacteria	0.97			Caulobacterales	0.95			Caulobacteraceae	0.95	Caulobacter	0.69
Otu892	0	0	0	0	0	0	0	0	0	0	0	0	0	0	0	0	0	0	0	0	0	0	0	0	0	0	0	0	0	0	n	Proteobacteria	0.53	Gammaproteobacteria	0.53			Xanthomonadales	0.53			Xanthomonadaceae	0.53	Fulvimonas	0.28
Otu893	0	0	0	0	0	0	0	0	0	0	0	0	0	0	0	0	0	0	0	0	0	0	0	0	0	0	0	0	0	0	n	Proteobacteria	0.66	Alphaproteobacteria	0.45			Rhizobiales	0.44			Rhodobiaceae	0.25	Dichotomicrobium	0.25
Otu894	0	0	0	0	0	0	0	0	0	0	0	0	0	0	0	0	0	0	0	0	0	0	0	0	0	0	0	0	0	0	n	Proteobacteria	1	Betaproteobacteria	1			Burkholderiales	0.99			Alcaligenaceae	0.97	Candidimonas	0.39
Otu895	0	0	0	0	0	0	0	0	0	0	0	0	0	0	0	0	0	0	0	0	0	0	0	0	0	0	0	0	0	0	n	Acidobacteria	0.89	Acidobacteria_Gp1	0.89									Edaphobacter	0.66
Otu896	0	0	0	0	0	0	0	0	0	0	0	0	0	0	0	0	0	0	0	0	0	0	0	0	0	0	0	0	0	0	n	Firmicutes	0.59	Bacilli	0.57			Bacillales	0.5			Bacillaceae 1	0.44	Falsibacillus	0.43
Otu897	0	0	0	1	0	0	0	0	0	0	0	0	0	0	0	0	0	0	2.64971e-05	0	0	0	0	0	0	0	0	0	0	0	n	Acidobacteria	1	Acidobacteria_Gp3	1									Paludibaculum	1
Otu898	0	0	0	0	0	0	0	0	0	0	0	0	0	0	0	0	0	0	0	0	0	0	0	0	0	0	0	0	0	0	n	Actinobacteria	0.81	Actinobacteria	0.81	Actinobacteridae	0.74	Actinomycetales	0.74	Propionibacterineae	0.74	Nocardioidaceae	0.74	Thermasporomyces	0.74
Otu899	0	0	0	0	0	0	0	0	0	0	0	0	0	0	0	0	0	0	0	0	0	0	0	0	0	0	0	0	0	0	n	Proteobacteria	0.87	Alphaproteobacteria	0.87			Rhizobiales	0.69			Phyllobacteriaceae	0.49	Pseudaminobacter	0.25
Otu90	81	94	44	39	205	0	0	0	0	0	0	0	0	0	0	0.00230625	0.00397614	0.00161101	0.00103339	0.00754009	0	0	0	0	0	0	0	0	0	0	n	Actinobacteria	1	Actinobacteria	1	Actinobacteridae	1	Actinomycetales	1	Corynebacterineae	1	Nocardiaceae	1	Gordonia	1
Otu900	0	0	0	0	0	0	0	0	0	0	0	0	0	0	0	0	0	0	0	0	0	0	0	0	0	0	0	0	0	0	n	Firmicutes	0.56	Clostridia	0.56			Clostridiales	0.56			Peptostreptococcaceae	0.56	Intestinibacter	0.2
Otu901	0	0	0	0	0	0	0	0	0	0	0	0	0	0	0	0	0	0	0	0	0	0	0	0	0	0	0	0	0	0	n	Acidobacteria	0.83	Acidobacteria_Gp4	0.81									Aridibacter	0.58
Otu902	0	0	0	0	0	0	0	0	0	0	0	0	0	0	0	0	0	0	0	0	0	0	0	0	0	0	0	0	0	0	n	Proteobacteria	0.94	Alphaproteobacteria	0.62			Rhodospirillales	0.17			Rhodospirillaceae	0.1	Pelagibius	0.09
Otu903	0	0	0	0	0	0	0	0	0	0	0	0	0	0	0	0	0	0	0	0	0	0	0	0	0	0	0	0	0	0	n	Proteobacteria	0.94	Alphaproteobacteria	0.79			Rhodospirillales	0.73			Acetobacteraceae	0.7	Endobacter	0.19
Otu904	0	0	0	0	0	0	0	0	0	0	0	0	0	0	0	0	0	0	0	0	0	0	0	0	0	0	0	0	0	0	n	Proteobacteria	1	Betaproteobacteria	0.94			Burkholderiales	0.93			Comamonadaceae	0.62	Pseudacidovorax	0.45
Otu905	0	0	0	0	0	0	0	0	0	0	0	0	0	0	0	0	0	0	0	0	0	0	0	0	0	0	0	0	0	0	n	Proteobacteria	0.6	Alphaproteobacteria	0.59			Rhizobiales	0.59			Xanthobacteraceae	0.13	Pseudolabrys	0.13
Otu906	0	0	0	0	0	0	0	0	0	0	0	0	0	0	0	0	0	0	0	0	0	0	0	0	0	0	0	0	0	0	n	Actinobacteria	0.28	Actinobacteria	0.28	Acidimicrobidae	0.28	Acidimicrobiales	0.28	"Acidimicrobineae"	0.28	Acidimicrobiaceae	0.21	Ferrithrix	0.19
Otu907	0	0	0	0	0	0	0	0	0	0	0	0	0	0	0	0	0	0	0	0	0	0	0	0	0	0	0	0	0	0	n	Nitrospirae	0.2	Nitrospira	0.2			"Nitrospirales"	0.2			"Nitrospiraceae"	0.2	Nitrospira	0.19
Otu908	0	0	0	0	0	0	0	0	0	0	0	0	0	0	0	0	0	0	0	0	0	0	0	0	0	0	0	0	0	0	n	Acidobacteria	0.99	Acidobacteria_Gp3	0.96									Candidatus Solibacter	0.93
Otu909	0	0	0	0	0	0	0	0	0	0	0	0	0	0	0	0	0	0	0	0	0	0	0	0	0	0	0	0	0	0	n	Acidobacteria	0.7	Acidobacteria_Gp1	0.5									Candidatus Koribacter	0.4
Otu91	0	0	0	0	0	0	0	0	0	0	0	0	0	0	0	0	0	0	0	0	0	0	0	0	0	0	0	0	0	0	n	Proteobacteria	1	Betaproteobacteria	1			Rhodocyclales	0.39			Rhodocyclaceae	0.39	Ferribacterium	0.1
Otu910	0	0	0	0	0	0	0	0	0	0	0	0	0	0	0	0	0	0	0	0	0	0	0	0	0	0	0	0	0	0	n	Proteobacteria	0.82	Betaproteobacteria	0.72			Burkholderiales	0.3			Comamonadaceae	0.25	Alicycliphilus	0.23
Otu911	0	0	0	0	0	0	0	0	0	0	0	0	0	0	0	0	0	0	0	0	0	0	0	0	0	0	0	0	0	0	n	Proteobacteria	0.91	Deltaproteobacteria	0.86			Myxococcales	0.85	Sorangiineae	0.85	Polyangiaceae	0.74	Byssovorax	0.56
Otu912	0	0	0	0	0	0	0	0	0	0	0	0	0	0	0	0	0	0	0	0	0	0	0	0	0	0	0	0	0	0	n	Proteobacteria	0.93	Betaproteobacteria	0.93			Burkholderiales	0.85			Burkholderiaceae	0.51	Paucimonas	0.1
Otu913	0	0	0	0	0	0	0	0	0	0	0	0	0	0	0	0	0	0	0	0	0	0	0	0	0	0	0	0	0	0	n	Nitrospirae	0.91	Nitrospira	0.91			"Nitrospirales"	0.91			"Nitrospiraceae"	0.91	Nitrospira	0.9
Otu914	0	0	0	0	2	0	0	0	0	0	0	0	0	0	0	0	0	0	0	7.35619e-05	0	0	0	0	0	0	0	0	0	0	n	Proteobacteria	0.76	Gammaproteobacteria	0.72			"Enterobacteriales"	0.34			Enterobacteriaceae	0.34	Rahnella	0.17
Otu915	0	0	0	0	0	0	0	0	0	0	0	0	0	0	0	0	0	0	0	0	0	0	0	0	0	0	0	0	0	0	n	Proteobacteria	0.92	Betaproteobacteria	0.92			Burkholderiales	0.9			Oxalobacteraceae	0.88	Rugamonas	0.34
Otu916	0	0	0	0	0	0	0	0	0	0	0	0	0	0	0	0	0	0	0	0	0	0	0	0	0	0	0	0	0	0	n	Firmicutes	0.52	Bacilli	0.51			Bacillales	0.47			Bacillaceae 1	0.43	Falsibacillus	0.35
Otu917	0	0	0	0	0	0	0	0	0	0	0	0	0	0	0	0	0	0	0	0	0	0	0	0	0	0	0	0	0	0	n	Proteobacteria	0.94	Deltaproteobacteria	0.93			Myxococcales	0.93	Nannocystineae	0.86	"Haliangiaceae"	0.53	Haliangium	0.53
Otu918	0	0	0	0	0	0	0	0	0	0	0	0	0	0	0	0	0	0	0	0	0	0	0	0	0	0	0	0	0	0	n	Proteobacteria	1	Alphaproteobacteria	1			Rhodospirillales	1			Rhodospirillaceae	1	Inquilinus	1
Otu919	0	0	0	0	0	0	0	0	0	0	0	0	0	0	0	0	0	0	0	0	0	0	0	0	0	0	0	0	0	0	n	Proteobacteria	0.98	Alphaproteobacteria	0.98			Sphingomonadales	0.51			Sphingomonadaceae	0.47	Rhizorhabdus	0.19
Otu92	0	0	0	0	0	0	0	0	0	0	0	0	0	0	0	0	0	0	0	0	0	0	0	0	0	0	0	0	0	0	n	Proteobacteria	1	Alphaproteobacteria	1			Rhodospirillales	1			Acetobacteraceae	1	Belnapia	0.85
Otu920	0	0	0	0	0	0	0	0	0	0	0	0	0	0	0	0	0	0	0	0	0	0	0	0	0	0	0	0	0	0	n	Proteobacteria	0.89	Alphaproteobacteria	0.87			Rhodospirillales	0.86			Acetobacteraceae	0.86	Rubritepida	0.56
Otu921	0	0	0	0	0	0	0	0	0	0	0	0	0	0	0	0	0	0	0	0	0	0	0	0	0	0	0	0	0	0	n	Proteobacteria	0.99	Alphaproteobacteria	0.88			Rhizobiales	0.87			Bradyrhizobiaceae	0.85	Tardiphaga	0.53
Otu922	0	0	0	0	0	0	0	0	0	0	0	0	0	0	0	0	0	0	0	0	0	0	0	0	0	0	0	0	0	0	n	Actinobacteria	0.75	Actinobacteria	0.75	Acidimicrobidae	0.54	Acidimicrobiales	0.54	"Acidimicrobineae"	0.54	Iamiaceae	0.46	Aquihabitans	0.37
Otu923	0	0	0	0	0	0	0	0	0	0	0	0	0	0	1	0	0	0	0	0	0	0	0	0	0	0	0	0	0	1.76975e-05	n	Firmicutes	1	Clostridia	1			Clostridiales	1			Clostridiaceae 1	1	Clostridium sensu stricto	1
Otu924	0	0	0	0	0	0	0	0	0	0	0	0	0	0	0	0	0	0	0	0	0	0	0	0	0	0	0	0	0	0	n	Chlamydiae	0.4	Chlamydiia	0.4			Chlamydiales	0.4			Waddliaceae	0.34	Waddlia	0.34
Otu925	0	0	0	0	0	0	0	0	0	0	0	0	0	0	0	0	0	0	0	0	0	0	0	0	0	0	0	0	0	0	n	Proteobacteria	0.91	Alphaproteobacteria	0.33			Alphaproteobacteria_incertae_sedis	0.3					Rhizomicrobium	0.3
Otu926	0	0	0	0	0	0	0	0	0	0	0	0	0	0	0	0	0	0	0	0	0	0	0	0	0	0	0	0	0	0	n	Actinobacteria	1	Actinobacteria	1	Actinobacteridae	1	Actinomycetales	1	Frankineae	0.69	Sporichthyaceae	0.36	Sporichthya	0.36
Otu927	0	0	0	0	0	0	0	0	0	0	0	0	0	0	0	0	0	0	0	0	0	0	0	0	0	0	0	0	0	0	n	Proteobacteria	1	Betaproteobacteria	1			Burkholderiales	1			Comamonadaceae	0.6	Ramlibacter	0.58
Otu928	0	0	0	0	0	0	0	0	0	0	0	0	0	0	0	0	0	0	0	0	0	0	0	0	0	0	0	0	0	0	n	Actinobacteria	0.28	Actinobacteria	0.27	Actinobacteridae	0.27	Actinomycetales	0.27	Micromonosporineae	0.21	Micromonosporaceae	0.21	Polymorphospora	0.03
Otu929	0	0	0	0	0	0	0	0	0	0	0	0	0	0	0	0	0	0	0	0	0	0	0	0	0	0	0	0	0	0	n	Proteobacteria	1	Alphaproteobacteria	1			Rhodospirillales	1			Acetobacteraceae	1	Roseomonas	0.41
Otu93	0	0	0	0	0	0	0	0	0	1	0	0	0	0	0	0	0	0	0	0	0	0	0	0	2.0014e-05	0	0	0	0	0	n	Actinobacteria	1	Actinobacteria	1	Actinobacteridae	1	Actinomycetales	1	Micrococcineae	1	Microbacteriaceae	1	Amnibacterium	1
Otu930	0	0	0	0	0	0	0	0	0	0	0	0	0	0	0	0	0	0	0	0	0	0	0	0	0	0	0	0	0	0	n	Proteobacteria	0.97	Alphaproteobacteria	0.79			Rhodospirillales	0.78			Acetobacteraceae	0.74	Acidisphaera	0.37
Otu931	0	0	0	0	0	11	45	4	4	33	0	0	13	0	0	0	0	0	0	0	0.000469063	0.00117795	0.000102741	9.96115e-05	0.000660462	0	0	0.000245348	0	0	n	Proteobacteria	0.99	Betaproteobacteria	0.69			Burkholderiales	0.68			Burkholderiales_incertae_sedis	0.57	Xylophilus	0.56
Otu932	0	0	0	0	0	0	0	0	0	0	0	0	0	0	0	0	0	0	0	0	0	0	0	0	0	0	0	0	0	0	n	Proteobacteria	1	Betaproteobacteria	1			Burkholderiales	0.95			Burkholderiaceae	0.84	Burkholderia	0.44
Otu933	0	0	0	0	0	0	0	0	0	0	0	0	0	0	0	0	0	0	0	0	0	0	0	0	0	0	0	0	0	0	n	Deinococcus-Thermus	0.41	Deinococci	0.41			Deinococcales	0.3			Trueperaceae	0.3	Truepera	0.3
Otu934	0	0	0	0	0	0	0	0	0	0	0	0	0	0	0	0	0	0	0	0	0	0	0	0	0	0	0	0	0	0	n	Firmicutes	0.54	Clostridia	0.25			Clostridiales	0.25			Lachnospiraceae	0.11	Mobilitalea	0.11
Otu935	0	0	0	0	0	0	3	1	0	0	0	0	0	0	0	0	0	0	0	0	0	7.85299e-05	2.56852e-05	0	0	0	0	0	0	0	n	Bacteroidetes	1	Sphingobacteriia	1			"Sphingobacteriales"	1			Chitinophagaceae	1	Chitinophaga	1
Otu936	0	0	0	0	0	0	0	0	0	0	0	0	0	0	0	0	0	0	0	0	0	0	0	0	0	0	0	0	0	0	n	Proteobacteria	1	Alphaproteobacteria	0.99			Rhizobiales	0.99			Methylobacteriaceae	0.75	Methylobacterium	0.48
Otu937	0	0	0	0	0	0	0	0	0	0	0	0	0	0	0	0	0	0	0	0	0	0	0	0	0	0	0	0	0	0	n	Firmicutes	0.47	Clostridia	0.39			Clostridiales	0.38			Clostridiaceae 1	0.31	Proteiniclasticum	0.26
Otu938	0	0	0	0	0	0	0	0	0	0	0	0	0	0	0	0	0	0	0	0	0	0	0	0	0	0	0	0	0	0	n	Proteobacteria	0.75	Alphaproteobacteria	0.75			Caulobacterales	0.4			Caulobacteraceae	0.39	Caulobacter	0.39
Otu939	0	0	0	0	0	0	0	0	0	0	0	0	0	0	0	0	0	0	0	0	0	0	0	0	0	0	0	0	0	0	n	Acidobacteria	1	Acidobacteria_Gp7	1									Gp7	1
Otu94	1	0	142	2	78	133	28	12	12	0	0	5	0	0	0	2.84722e-05	0	0.00519918	5.29942e-05	0.00286891	0.0056714	0.000732946	0.000308222	0.000298835	0	0	0.000118483	0	0	0	n	Proteobacteria	1	Alphaproteobacteria	1			Rhizobiales	1			Methylobacteriaceae	1	Methylobacterium	1
Otu940	0	0	0	0	0	0	0	0	0	0	0	0	0	0	0	0	0	0	0	0	0	0	0	0	0	0	0	0	0	0	n	Proteobacteria	1	Betaproteobacteria	0.86			Burkholderiales	0.84			Oxalobacteraceae	0.77	Duganella	0.49
Otu941	0	0	0	0	0	67	141	63	156	0	0	0	0	0	0	0	0	0	0	0	0.00285702	0.00369091	0.00161816	0.00388485	0	0	0	0	0	0	n	Proteobacteria	1	Alphaproteobacteria	1			Rhizobiales	0.6			Rhizobiales_incertae_sedis	0.57	Hartmannibacter	0.57
Otu942	0	0	0	0	0	0	0	0	0	0	0	0	0	0	0	0	0	0	0	0	0	0	0	0	0	0	0	0	0	0	n	Actinobacteria	0.73	Actinobacteria	0.73	Actinobacteridae	0.73	Actinomycetales	0.73	Micrococcineae	0.67	Intrasporangiaceae	0.49	Intrasporangium	0.35
Otu943	0	0	0	0	0	0	0	0	0	0	0	0	0	0	0	0	0	0	0	0	0	0	0	0	0	0	0	0	0	0	n	Acidobacteria	0.64	Acidobacteria_Gp3	0.54									Bryobacter	0.48
Otu944	0	0	0	0	0	0	0	0	0	0	0	0	0	0	0	0	0	0	0	0	0	0	0	0	0	0	0	0	0	0	n	Proteobacteria	0.87	Betaproteobacteria	0.87			Burkholderiales	0.86			Oxalobacteraceae	0.82	Duganella	0.48
Otu945	0	0	0	0	0	0	0	0	0	0	0	0	0	0	0	0	0	0	0	0	0	0	0	0	0	0	0	0	0	0	n	Proteobacteria	1	Betaproteobacteria	0.99			Burkholderiales	0.98			Burkholderiaceae	0.96	Burkholderia	0.57
Otu946	0	0	0	0	0	0	0	0	0	0	0	0	0	0	0	0	0	0	0	0	0	0	0	0	0	0	0	0	0	0	n	Proteobacteria	1	Betaproteobacteria	0.48			Burkholderiales	0.46			Burkholderiaceae	0.29	Paucimonas	0.23
Otu947	0	0	0	0	0	0	0	0	0	0	0	0	0	0	0	0	0	0	0	0	0	0	0	0	0	0	0	0	0	0	n	Proteobacteria	1	Betaproteobacteria	1			Sulfuricellales	0.48			Sulfuricellaceae	0.48	Sulfuriferula	0.48
Otu948	0	0	0	0	0	0	0	0	0	0	0	0	0	0	0	0	0	0	0	0	0	0	0	0	0	0	0	0	0	0	n	Actinobacteria	1	Actinobacteria	1	Actinobacteridae	1	Actinomycetales	1	Kineosporiineae	0.58	Kineosporiaceae	0.58	Angustibacter	0.21
Otu949	0	0	0	0	0	0	0	0	0	0	0	0	0	0	0	0	0	0	0	0	0	0	0	0	0	0	0	0	0	0	n	Proteobacteria	0.95	Deltaproteobacteria	0.75			Bdellovibrionales	0.47			Bdellovibrionaceae	0.43	Bdellovibrio	0.43
Otu95	0	0	0	0	0	0	0	0	0	0	0	0	0	0	0	0	0	0	0	0	0	0	0	0	0	0	0	0	0	0	n	Proteobacteria	1	Betaproteobacteria	1			Nitrosomonadales	1			Nitrosomonadaceae	1	Nitrosospira	1
Otu950	0	0	0	0	0	0	0	0	0	0	0	0	0	0	0	0	0	0	0	0	0	0	0	0	0	0	0	0	0	0	n	Proteobacteria	0.98	Deltaproteobacteria	0.48			Myxococcales	0.36	Cystobacterineae	0.36	Cystobacteraceae	0.1	Melittangium	0.1
Otu951	0	0	0	0	0	0	0	0	0	0	0	0	0	0	0	0	0	0	0	0	0	0	0	0	0	0	0	0	0	0	n	Actinobacteria	0.78	Actinobacteria	0.78	Nitriliruptoridae	0.19	Euzebyales	0.17			Euzebyaceae	0.17	Euzebya	0.17
Otu952	0	0	0	0	0	0	0	0	0	0	0	0	0	0	0	0	0	0	0	0	0	0	0	0	0	0	0	0	0	0	n	Acidobacteria	0.3	Acidobacteria_Gp3	0.26									Bryobacter	0.25
Otu953	0	0	0	0	0	0	0	0	0	0	0	0	0	0	0	0	0	0	0	0	0	0	0	0	0	0	0	0	0	0	n	Proteobacteria	0.95	Alphaproteobacteria	0.33			Rhodospirillales	0.3			Acetobacteraceae	0.29	Ameyamaea	0.13
Otu954	0	0	0	0	0	0	0	0	0	0	0	0	0	0	0	0	0	0	0	0	0	0	0	0	0	0	0	0	0	0	n	Proteobacteria	1	Gammaproteobacteria	0.68			"Enterobacteriales"	0.31			Enterobacteriaceae	0.31	Yokenella	0.08
Otu955	0	0	0	0	0	1	0	0	0	0	2	0	1	1	0	0	0	0	0	0	4.26421e-05	0	0	0	0	2.93681e-05	0	1.88729e-05	1.74095e-05	0	n	Proteobacteria	1	Betaproteobacteria	0.82			Burkholderiales	0.82			Comamonadaceae	0.73	Diaphorobacter	0.18
Otu956	0	0	0	0	0	0	0	0	0	0	0	0	0	0	0	0	0	0	0	0	0	0	0	0	0	0	0	0	0	0	n	Proteobacteria	0.61	Deltaproteobacteria	0.5			Myxococcales	0.19			Sandaracinaceae	0.17	Sandaracinus	0.17
Otu957	0	0	0	0	0	0	0	0	0	0	0	0	0	0	0	0	0	0	0	0	0	0	0	0	0	0	0	0	0	0	n	Proteobacteria	0.68	Alphaproteobacteria	0.62			Rhodospirillales	0.28			Rhodospirillaceae	0.28	Telmatospirillum	0.13
Otu958	0	0	0	0	0	0	0	0	0	0	0	0	0	0	0	0	0	0	0	0	0	0	0	0	0	0	0	0	0	0	n	Actinobacteria	0.51	Actinobacteria	0.45	Rubrobacteridae	0.44	Solirubrobacterales	0.38			Conexibacteraceae	0.25	Conexibacter	0.25
Otu959	0	0	0	0	0	0	0	0	0	0	0	0	0	0	0	0	0	0	0	0	0	0	0	0	0	0	0	0	0	0	n	Chloroflexi	0.52	Ardenticatenia	0.15			Ardenticatenales	0.15			Ardenticatenaceae	0.15	Ardenticatena	0.15
Otu96	0	0	0	0	0	0	0	0	0	0	0	5	0	0	0	0	0	0	0	0	0	0	0	0	0	0	0.000118483	0	0	0	n	Proteobacteria	1	Alphaproteobacteria	1			Rhizobiales	0.98			Hyphomicrobiaceae	0.9	Pelagibacterium	0.72
Otu960	0	0	0	0	0	0	0	0	0	0	0	0	0	0	0	0	0	0	0	0	0	0	0	0	0	0	0	0	0	0	n	Proteobacteria	1	Alphaproteobacteria	1			Sphingomonadales	1			Sphingomonadaceae	1	Sphingomonas	0.98
Otu961	0	0	0	0	0	0	0	0	0	0	0	0	0	0	0	0	0	0	0	0	0	0	0	0	0	0	0	0	0	0	n	Proteobacteria	0.63	Deltaproteobacteria	0.55			Syntrophobacterales	0.29			Syntrophobacteraceae	0.28	Desulfoglaeba	0.25
Otu962	0	0	0	0	0	0	0	0	0	0	0	0	0	0	0	0	0	0	0	0	0	0	0	0	0	0	0	0	0	0	n	Proteobacteria	0.5	Deltaproteobacteria	0.29			Syntrophobacterales	0.14			Syntrophobacteraceae	0.14	Desulfovirga	0.13
Otu963	0	0	0	0	0	0	0	0	0	0	0	0	0	0	0	0	0	0	0	0	0	0	0	0	0	0	0	0	0	0	n	Proteobacteria	0.98	Alphaproteobacteria	0.82			Sphingomonadales	0.63			Sphingomonadaceae	0.46	Sandarakinorhabdus	0.1
Otu964	0	0	0	0	0	0	0	0	0	0	0	0	0	0	0	0	0	0	0	0	0	0	0	0	0	0	0	0	0	0	n	Bacteroidetes	1	Flavobacteriia	1			"Flavobacteriales"	1			Flavobacteriaceae	1	Flavobacterium	0.82
Otu965	0	0	0	0	0	0	0	0	0	0	0	0	0	0	0	0	0	0	0	0	0	0	0	0	0	0	0	0	0	0	n	Acidobacteria	0.63	Acidobacteria_Gp3	0.63									Candidatus Solibacter	0.62
Otu966	0	0	0	0	0	0	0	0	0	0	0	0	0	0	0	0	0	0	0	0	0	0	0	0	0	0	0	0	0	0	n	Actinobacteria	1	Actinobacteria	1	Acidimicrobidae	0.95	Acidimicrobiales	0.95	"Acidimicrobineae"	0.95	Iamiaceae	0.51	Aquihabitans	0.51
Otu967	0	0	0	0	0	0	0	0	0	0	0	0	0	0	0	0	0	0	0	0	0	0	0	0	0	0	0	0	0	0	n	Proteobacteria	1	Alphaproteobacteria	0.52			Rhodospirillales	0.39					Reyranella	0.35
Otu968	0	0	0	0	0	0	0	0	0	0	0	0	0	0	0	0	0	0	0	0	0	0	0	0	0	0	0	0	0	0	n	Proteobacteria	0.86	Deltaproteobacteria	0.77			Myxococcales	0.66	Nannocystineae	0.43	"Haliangiaceae"	0.24	Haliangium	0.24
Otu969	0	0	0	0	0	0	0	0	0	0	0	0	0	0	0	0	0	0	0	0	0	0	0	0	0	0	0	0	0	0	n	Proteobacteria	1	Betaproteobacteria	1			Nitrosomonadales	0.43			Nitrosomonadaceae	0.43	Nitrosospira	0.43
Otu97	0	0	0	0	0	0	0	0	0	1	0	0	0	0	0	0	0	0	0	0	0	0	0	0	2.0014e-05	0	0	0	0	0	n	Actinobacteria	1	Actinobacteria	1	Actinobacteridae	1	Actinomycetales	1	Propionibacterineae	0.35	Nocardioidaceae	0.28	Nocardioides	0.25
Otu970	0	0	0	0	0	0	2	0	0	0	0	0	0	0	0	0	0	0	0	0	0	5.23533e-05	0	0	0	0	0	0	0	0	n	Proteobacteria	1	Gammaproteobacteria	0.5			Pseudomonadales	0.36			Pseudomonadaceae	0.36	Azomonas	0.36
Otu971	0	0	0	0	0	0	0	0	0	0	0	0	0	0	0	0	0	0	0	0	0	0	0	0	0	0	0	0	0	0	n	Chloroflexi	0.84	Ktedonobacteria	0.75			Ktedonobacterales	0.71			Thermosporotrichaceae	0.52	Thermosporothrix	0.52
Otu972	0	0	0	0	0	0	0	0	0	0	0	0	0	0	0	0	0	0	0	0	0	0	0	0	0	0	0	0	0	0	n	Acidobacteria	0.8	Acidobacteria_Gp3	0.79									Candidatus Solibacter	0.45
Otu973	0	0	0	0	0	0	0	0	0	0	0	0	0	0	0	0	0	0	0	0	0	0	0	0	0	0	0	0	0	0	n	Proteobacteria	1	Alphaproteobacteria	1			Rhodospirillales	0.95			Acetobacteraceae	0.93	Acidisphaera	0.19
Otu974	0	0	0	0	0	0	0	0	0	0	0	0	0	0	0	0	0	0	0	0	0	0	0	0	0	0	0	0	0	0	n	Proteobacteria	0.48	Betaproteobacteria	0.44			Rhodocyclales	0.17			Rhodocyclaceae	0.17	Uliginosibacterium	0.17
Otu975	0	0	0	0	0	0	0	0	0	0	0	0	0	0	0	0	0	0	0	0	0	0	0	0	0	0	0	0	0	0	n	Proteobacteria	0.96	Alphaproteobacteria	0.95			Sphingomonadales	0.78			Sphingomonadaceae	0.78	Sandarakinorhabdus	0.66
Otu976	0	0	0	0	0	0	0	0	0	0	0	0	0	0	0	0	0	0	0	0	0	0	0	0	0	0	0	0	0	0	n	Proteobacteria	0.66	Alphaproteobacteria	0.63			Rhizobiales	0.63			Beijerinckiaceae	0.62	Methyloferula	0.32
Otu977	0	0	0	0	0	0	0	0	0	0	0	0	0	0	0	0	0	0	0	0	0	0	0	0	0	0	0	0	0	0	n	Proteobacteria	1	Betaproteobacteria	1			Rhodocyclales	0.62			Rhodocyclaceae	0.62	Methyloversatilis	0.24
Otu978	0	0	0	0	0	0	0	0	0	0	0	0	0	0	0	0	0	0	0	0	0	0	0	0	0	0	0	0	0	0	n	Proteobacteria	0.57	Alphaproteobacteria	0.57			Rhizobiales	0.57			Bradyrhizobiaceae	0.56	Tardiphaga	0.55
Otu979	0	0	0	0	0	0	0	0	0	0	0	0	0	0	0	0	0	0	0	0	0	0	0	0	0	0	0	0	0	0	n	Proteobacteria	0.69	Alphaproteobacteria	0.38			Rhizobiales	0.14			Methylobacteriaceae	0.03	Psychroglaciecola	0.02
Otu98	0	0	0	0	0	0	0	0	0	0	0	0	0	0	0	0	0	0	0	0	0	0	0	0	0	0	0	0	0	0	n	Proteobacteria	1	Alphaproteobacteria	1			Rhizobiales	0.97			Methylobacteriaceae	0.45	Psychroglaciecola	0.38
Otu980	0	0	0	0	0	0	0	0	0	0	0	0	0	0	0	0	0	0	0	0	0	0	0	0	0	0	0	0	0	0	n	Proteobacteria	0.98	Betaproteobacteria	0.76			Rhodocyclales	0.43			Rhodocyclaceae	0.43	Uliginosibacterium	0.25
Otu981	0	0	0	0	0	0	0	0	0	0	0	0	0	0	0	0	0	0	0	0	0	0	0	0	0	0	0	0	0	0	n	Actinobacteria	1	Actinobacteria	1	Actinobacteridae	1	Actinomycetales	1	Micromonosporineae	0.89	Micromonosporaceae	0.89	Longispora	0.41
Otu982	0	0	0	0	0	0	0	0	0	0	0	0	0	0	0	0	0	0	0	0	0	0	0	0	0	0	0	0	0	0	n	Actinobacteria	0.85	Actinobacteria	0.78	Rubrobacteridae	0.6	Solirubrobacterales	0.6			Conexibacteraceae	0.24	Conexibacter	0.24
Otu983	0	0	0	0	0	0	0	0	0	0	0	0	0	0	0	0	0	0	0	0	0	0	0	0	0	0	0	0	0	0	n	Actinobacteria	1	Actinobacteria	1	Actinobacteridae	1	Actinomycetales	1	Corynebacterineae	0.99	Mycobacteriaceae	0.99	Mycobacterium	0.95
Otu984	0	0	0	0	0	0	0	0	0	0	0	0	0	0	0	0	0	0	0	0	0	0	0	0	0	0	0	0	0	0	n	Acidobacteria	1	Acidobacteria_Gp5	1									Gp5	1
Otu985	0	0	0	0	0	0	0	0	0	0	0	0	0	0	0	0	0	0	0	0	0	0	0	0	0	0	0	0	0	0	n	Proteobacteria	0.89	Alphaproteobacteria	0.82			Rickettsiales	0.43			Rickettsiaceae	0.17	Orientia	0.17
Otu986	0	0	0	0	0	5	0	0	0	0	0	0	0	0	0	0	0	0	0	0	0.000213211	0	0	0	0	0	0	0	0	0	n	Proteobacteria	0.94	Alphaproteobacteria	0.6			Rhizobiales	0.5			Bradyrhizobiaceae	0.39	Oligotropha	0.22
Otu987	0	0	0	0	0	0	0	0	0	0	0	0	0	0	0	0	0	0	0	0	0	0	0	0	0	0	0	0	0	0	n	Acidobacteria	0.43	Acidobacteria_Gp1	0.42									Acidipila	0.3
Otu988	0	0	0	0	0	0	0	0	0	0	0	0	0	0	0	0	0	0	0	0	0	0	0	0	0	0	0	0	0	0	n	Nitrospirae	0.55	Nitrospira	0.55			"Nitrospirales"	0.55			"Nitrospiraceae"	0.55	Nitrospira	0.55
Otu989	0	3	0	0	0	0	0	0	0	0	0	0	0	0	0	0	0.000126898	0	0	0	0	0	0	0	0	0	0	0	0	0	n	Proteobacteria	0.4	Alphaproteobacteria	0.39			Sphingomonadales	0.38			Sphingomonadaceae	0.19	Hephaestia	0.1
Otu99	3	35	7	3	217	62	496	375	772	5	0	0	0	0	0	8.54165e-05	0.00148048	0.000256298	7.94913e-05	0.00798146	0.00264381	0.0129836	0.00963193	0.019225	0.00010007	0	0	0	0	0	n	Proteobacteria	1	Gammaproteobacteria	1			Xanthomonadales	1			Xanthomonadaceae	1	Stenotrophomonas	0.91
Otu990	0	6	0	0	3	8	0	2	0	0	0	0	0	0	0	0	0.000253796	0	0	0.000110343	0.000341137	0	5.13703e-05	0	0	0	0	0	0	0	n	Proteobacteria	0.74	Betaproteobacteria	0.74			Burkholderiales	0.71			Alcaligenaceae	0.63	Eoetvoesia	0.24
Otu991	0	0	0	0	0	0	0	0	0	0	0	0	0	0	0	0	0	0	0	0	0	0	0	0	0	0	0	0	0	0	n	Proteobacteria	0.62	Betaproteobacteria	0.51			Burkholderiales	0.49			Oxalobacteraceae	0.15	Rugamonas	0.1
Otu992	0	0	0	0	0	0	0	0	0	0	0	0	0	0	0	0	0	0	0	0	0	0	0	0	0	0	0	0	0	0	n	Proteobacteria	0.98	Alphaproteobacteria	0.98			Rhizobiales	0.97			Bradyrhizobiaceae	0.96	Tardiphaga	0.91
Otu993	0	0	0	0	0	0	0	0	0	0	0	0	0	0	0	0	0	0	0	0	0	0	0	0	0	0	0	0	0	0	n	Proteobacteria	0.82	Betaproteobacteria	0.59			Burkholderiales	0.42			Comamonadaceae	0.32	Macromonas	0.14
Otu994	0	0	0	0	0	0	0	0	0	0	0	0	0	0	0	0	0	0	0	0	0	0	0	0	0	0	0	0	0	0	n	Proteobacteria	1	Alphaproteobacteria	0.98			Rhizobiales	0.98			Beijerinckiaceae	0.8	Methylocella	0.47
Otu995	0	0	0	0	0	0	0	0	0	0	0	0	0	0	0	0	0	0	0	0	0	0	0	0	0	0	0	0	0	0	n	Acidobacteria	0.48	Acidobacteria_Gp1	0.47									Acidobacterium	0.44
Otu996	0	0	0	0	0	0	0	0	0	0	0	0	0	0	0	0	0	0	0	0	0	0	0	0	0	0	0	0	0	0	n	Acidobacteria	0.56	Acidobacteria_Gp1	0.56									Candidatus Koribacter	0.5
Otu997	0	0	0	0	0	0	0	0	0	0	0	0	0	0	0	0	0	0	0	0	0	0	0	0	0	0	0	0	0	0	n	Acidobacteria	0.84	Acidobacteria_Gp3	0.76									Candidatus Solibacter	0.51
Otu998	0	0	0	0	0	0	0	0	0	0	0	0	0	0	0	0	0	0	0	0	0	0	0	0	0	0	0	0	0	0	n	Proteobacteria	0.94	Betaproteobacteria	0.5			Rhodocyclales	0.41			Rhodocyclaceae	0.41	Ferribacterium	0.36
Otu999	0	0	0	0	0	0	0	0	0	0	0	0	0	0	0	0	0	0	0	0	0	0	0	0	0	0	0	0	0	0	n	Proteobacteria	0.61	Alphaproteobacteria	0.42			Rhodospirillales	0.28			Rhodospirillaceae	0.26	Magnetovibrio	0.12
